# Supplementary material for: Injury threshold of oral contact with hot foods and method for its sensory evaluation
Source: Preprints.org preprint supplement (doi:10.20944/preprints201808.0126.v2), 2018-08-09
Supplement: Supplementary file 1 [file supplementary]

## Sheet: Eingabe
							Physikalisches Modell für die Berechnung
		Eingaben nur in den grün unterlegten Feldern
	Umgebungstemperatur [°C]	20
	Wärmeübergangszahl linke Fläche α₁ [W/m2∙K]	20					T =70 °C			T =35 °C
	Wärmeübergangszahl rechte Fläche: α₃ [W/m2∙K]	300					Kartoffeln			menschliche Haut
	Temperatur Umgebung [°C]	20				α₁=20					α₃=300
	Temperatur menschliche Haut [°C]	35
	Starttemperatur Probe (links) [°C]	70
	Starttemperatur rechts:	35
	Gesamtdicke cm	0.5
	Verkleinerungsfaktor für Volumenelemente an der Kontaktfläche *	1						Kontaktproblem
	Zeitintervall s; (tmax = 100,65 s)	0.05						homogener Körper
Auswahl der Kontaktpartner: Nummer des Materials siehe Tabelle "Kontakte"			Auswahl Nr.
	21	1	22	Gemüse
	Umgebung/links	Festkörper rechts	9	Fisch
Bezeichnung	Kartoffeln	menschliche Haut	14	Olivenöl
Wärmeleitfähigkeit λ[W/(m·K]	0.55	0.5	21	Kartoffeln
Dichte ρ[kg/m³]	1050	1020	19	Fleich mager
spezifische Wärme c[J/(kg·K]	3350	2400	4	Wasser
Temperaturleitzahl	1.56361e-07	2.04248e-07	7	PVC
Wärmeeindringzahl	1390.91	1106.35
Wärmekapazität	1875.5	1564.61
	* Temperatur bei x = 0 wird genauer berechnet, wenn Dicke der
	Volumenelemente an der Kontaktfläche reduziert wird. Eingestellt
	wird der Verkleinerungsfaktor. Er kann nicht beliebig groß gewählt
	werden, sonst wird das Verfahren instabil.

## Sheet: Rechner
			Kontakt	Durchgang																								Alu
	Auswahl		0	1
	Wärmedurchgang ( = 1) oder Kontaktproblem?	0
	Für Wärmedurchgang: Art der Wärmezufuhr
	begrenzte Kontaktzeit (=1) oder abklingend gem Vorgabe		0	2
Begrenzte Masse als Wärmequelle (=2) Einstell. in Tab. "Abkühlen"		0	30	30
	Für Wärmedurchgang: Umgebungstemperatur nach Wärmezufuhr [°C ]	20	0	1000
	Wärmeübergangszahl mit Wärmezufuhr: linke Fläche α1	20	0	60
	Wärmeübergangszahl ohne Wärmezufuhr: linke Fläche: α2	20	0	0
	Wärmeübergangszahl rechte Fläche: α3	300	20	20									Temperaturausgleich von zwei Festkörpern
	Kontaktzeit links Sekunden	0	80	80
	Temperatur Wärmeträger links [°C]	20	35	30									0.195833		0.0002	0.000191667
	Temperatur Wärmeträger rechts [°C]	35	80	35
	Starttemperatur [°C] (links = rechts)	70	0	0				1	λ	ρ	c	Tstart	2	λ	ρ	c	Tstart	3	λ	ρ	c	Tstart	4	λ	ρ	c	Tstart	5	λ	ρ	c	Tstart	6	λ	ρ	c	Tstart	7	λ	ρ	c	Tstart	8	λ	ρ	c	Tstart	9	λ
	Schichten 14 - 16 mit andere Wärmeleitfähigkeit Ja = 1	0						0	0.55	1050	3350	70		0.55	1050	3350	70		0.55	1050	3350	70		0.55	1050	3350	70		0.55	1050	3350	70		0.55	1050	3350	70		0.55	1050	3350	70		0.55	1050	3350	70		0.55
	Gewählte Wärmeleitfähigkeit λ =	1						0		0.1		0.0002	0.0002		0.295833		0.000391667	0.000391667		0.4875		0.000583333	0.000583333		0.679167		0.000775	0.000775		0.870833		0.000966667	0.000966667		1.0625		0.00115833	0.00115833		1.25417		0.00135	0.00135		1.44583		0.00154167	0.00154167
	Für Kontaktproblem: Starttemperaturen links/rechts		35	35	dt	t	Tꚙ	T Wand	Qzu [Ws]	Tm	Qab [Ws]				Tm	Qab [Ws]			0	Tm	Qab [Ws]				Tm	Qab [Ws]				Tm	Qab [Ws]				Tm	Qab [Ws]				Tm	Qab [Ws]				Tm	Qab [Ws]
	Links wie oben eingegeben. Rechts:	35		α1
				20	0.05	0	20	70	0	70	0				70	0				70	0				70	0				70	0				70	0				70	0				70	0
Geometrie: Ebene Platten				20	0.05	0.05	20	69.9289	-0.045	69.9289	0	0			70	0				70	0				70	0				70	0				70	0				70	0				70	0
	Gesamtdicke cm	0.5		20	0.05	0.1	20	69.8358	-0.044936	69.8721	-0.00898244	-0.181818			69.9852	0				70	0				70	0				70	0				70	0				70	0				70	0
Dicke der Volumenelemente linke und rechte Wand				20	0.05	0.15	20	69.7661	-0.0448522	69.8239	-0.0142882	-0.18156			69.9648	-0.00191161				69.9968	0				70	0				70	0				70	0				70	0				70	0
	zusätzlich zum Soll-Intervall in %	0		20	0.05	0.2	20	69.7093	-0.0447895	69.7813	-0.0178112	-0.181221			69.9423	-0.00413873				69.9907	-0.000406823				69.9993	0				70	0				70	0				70	0				70	0
	Resultierende Dicke beider Volumenelemente	0.0002		20	0.05	0.25	20	69.6605	-0.0447383	69.7427	-0.0203485	-0.180968			69.919	-0.00625424				69.9822	-0.00111446				69.9976	-8.65786e-05				69.9999	0				70	0				70	0				70	0
	Kontaktproblem: Schichtdicke in der Mitte an Trennfläche mm	0.2		20	0.05	0.3	20	69.6173	-0.0446944	69.7073	-0.0222813	-0.180761			69.8958	-0.0081599				69.9721	-0.00198954				69.9948	-0.000286903				69.9994	-1.84254e-05				70	0				70	0				69.9969	0.00187903
	Kontaktfläche A m^2	0.0009		20	0.05	0.35	20	69.5782	-0.0446556	69.6744	-0.0238138	-0.180584			69.8728	-0.00985201				69.9607	-0.00294034				69.991	-0.000592115				69.9986	-7.16405e-05				69.9999	-3.92122e-06				69.9993	0.000399889				69.9871	0.00634722
	Volumen V m^3	1.8e-07		20	0.05	0.4	20	69.5422	-0.0446204	69.6435	-0.025066	-0.180426			69.8502	-0.0113524				69.9484	-0.00391152				69.9861	-0.000981091				69.9972	-0.000167994				69.9995	6.76046e-05				69.9968	0.00157964				69.968	0.0131693
	x-Intervall [m] (xmax = 5 mm)	0.0002		20	0.05	0.45	20	69.5088	-0.044588	69.6144	-0.0261128	-0.180284			69.828	-0.0126873				69.9355	-0.00487142				69.9805	-0.00143169				69.9953	-0.000290896				69.9984	0.000339252				69.9913	0.00372432				69.9383	0.0217387
	Zeitintervall s; (tmax = 100,6 s)	0.05		20	0.05	0.5	20	69.4775	-0.0445579	69.5866	-0.0270043	-0.180154			69.8064	-0.0138811				69.9222	-0.00580274				69.9741	-0.00192094				69.9928	-0.000399571				69.9962	0.000925544				69.9815	0.00683767				69.8978	0.0314151
				20	0.05	0.55	20	69.4479	-0.0445298	69.5602	-0.0277748	-0.180032			69.7853	-0.0149547				69.9086	-0.00669585				69.967	-0.00242328				69.9896	-0.000441338				69.9924	0.00190174				69.9668	0.01081				69.847	0.0416587
Auswahl der Kontaktpartner: Nummer des Materials siehe Tabelle "Kontakte"				20	0.05	0.6	20	69.4198	-0.0445031	69.5348	-0.028449	-0.179918			69.7646	-0.0159254				69.8948	-0.00754421				69.9594	-0.00291076				69.9854	-0.000364483				69.9863	0.00329891				69.9468	0.0154793				69.7867	0.0520603
	21	1		20	0.05	0.65	20	69.3931	-0.0444779	69.5104	-0.029045	-0.179811			69.7445	-0.016807				69.8808	-0.0083418				69.9512	-0.00335495				69.98	-0.000126743				69.9777	0.00511146				69.9211	0.0206721				69.718	0.0623302
	Umgebung/links	Festkörper rechts		20	0.05	0.7	20	69.3674	-0.0444538	69.4869	-0.0295765	-0.179709			69.7247	-0.0176099				69.8668	-0.00908204				69.9423	-0.00372922				69.9734	0.000301018				69.9662	0.00730825				69.8899	0.0262261				69.6421	0.0722742
Bezeichnung	Kartoffeln	menschliche Haut		20	0.05	0.75	20	69.3428	-0.0444307	69.4642	-0.0300537	-0.179611			69.7054	-0.0183417				69.8526	-0.00975774				69.9329	-0.00401069				69.9653	0.000934573				69.9515	0.00984303				69.8534	0.0319999				69.5601	0.0817699
Wärmeleitfähigkeit λ[W/(m·K]	0.55	0.5		20	0.05	0.8	20	69.3191	-0.0444085	69.4422	-0.030484	-0.179518			69.6865	-0.0190074				69.8384	-0.0103615				69.9227	-0.00418132				69.9554	0.00177801				69.9335	0.0126625				69.8119	0.0378764				69.473	0.0907464
Dichte ρ[kg/m³]	1050	1020		20	0.05	0.85	20	69.2961	-0.0443872	69.4209	-0.030873	-0.179428			69.668	-0.0196098				69.824	-0.0108862				69.9117	-0.00422832				69.9438	0.00282616				69.9123	0.015712				69.7656	0.0437621				69.3817	0.0991694
spezifische Wärme c[J/(kg·K]	3350	2400		20	0.05	0.9	20	69.274	-0.0443665	69.4001	-0.0312246	-0.179342			69.6497	-0.0201503				69.8095	-0.0113258				69.8999	-0.00414393				69.9303	0.00406718				69.8878	0.0189392				69.7151	0.0495842				69.287	0.107029
Temperaturleitzahl	1.56361e-07	2.04248e-07		20	0.05	0.95	20	69.2525	-0.0443466	69.3799	-0.0315412	-0.179259			69.6317	-0.0206291				69.7947	-0.0116754				69.8871	-0.0039249				69.9148	0.00548474				69.8601	0.022296				69.6608	0.0552876				69.1897	0.114333
Wärmeeindringzahl	1390.91	1106.35		20	0.05	1	20	69.2316	-0.0443272	69.3602	-0.0318244	-0.179178			69.614	-0.0210459				69.7797	-0.0119315				69.8733	-0.00357181				69.8972	0.00705992				69.8293	0.0257394				69.6029	0.0608322				69.0904	0.121097
Wärmekapazität	1875.5	1564.61		20	0.05	1.05	20	69.2112	-0.0443084	69.3408	-0.032075	-0.1791			69.5964	-0.0214				69.7643	-0.0120921				69.8585	-0.00308827				69.8777	0.00877262				69.7956	0.0292324				69.542	0.0661893				68.9896	0.127348
				20	0.05	1.1	20	69.1914	-0.0442901	69.3219	-0.0322935	-0.179024			69.5789	-0.021691				69.7486	-0.0121568				69.8425	-0.00248024				69.8561	0.0106026				69.7591	0.0327433				69.4784	0.0713398				68.8878	0.133111
				20	0.05	1.15	20	69.172	-0.0442723	69.3033	-0.0324797	-0.17895			69.5615	-0.0219183				69.7325	-0.0121265				69.8254	-0.00175533				69.8326	0.0125303				69.72	0.0362454				69.4124	0.0762717				68.7853	0.138417
				20	0.05	1.2	20	69.1531	-0.0442548	69.2849	-0.0326338	-0.178878			69.5441	-0.0220821				69.7159	-0.0120032				69.8072	-0.000922274				69.8071	0.014537				69.6785	0.0397167				69.3444	0.0809791				68.6826	0.143296
	17	17		20	0.05	1.25	20	69.1344	-0.0442377	69.2668	-0.0327557	-0.178807			69.5267	-0.0221827				69.6988	-0.01179				69.7877	9.51316e-06				69.7798	0.0166057				69.6348	0.0431393				69.2747	0.0854599				68.5799	0.147778
				20	0.05	1.3	20	69.1161	-0.044221	69.2488	-0.0328454	-0.178738			69.5092	-0.0222211				69.6811	-0.0114906				69.7671	0.00103033				69.7506	0.0187205				69.589	0.0464991				69.2035	0.0897156				68.4775	0.15189
Time [s]				20	0.05	1.35	20	69.098	-0.0442045	69.231	-0.0329032	-0.178671			69.4915	-0.0221985				69.6628	-0.0111096				69.7453	0.00213044				69.7197	0.0208675				69.5413	0.0497845				69.131	0.0937501				68.3754	0.155659
Temperature [°C]		kleiner Trennf		20	0.05	1.4	20	69.0801	-0.0441882	69.2132	-0.0329293	-0.178604			69.4737	-0.0221167				69.6439	-0.0106518				69.7223	0.0033003				69.6872	0.023034				69.492	0.0529871				69.0575	0.0975688				68.274	0.159113
Depth x [mm]		20		20	0.05	1.45	20	69.0624	-0.0441721	69.1954	-0.0329246	-0.178538			69.4557	-0.0219779				69.6244	-0.0101225				69.6981	0.00453072				69.6531	0.0252088				69.4411	0.0561003				68.9832	0.101179				68.1733	0.162273
				20	0.05	1.5	20	69.0447	-0.0441561	69.1776	-0.0328896	-0.178473			69.4374	-0.0217845				69.6042	-0.00952706				69.6729	0.00581293				69.6176	0.0273824				69.3888	0.0591195				68.9083	0.104587				68.0735	0.165163
Kartoffeln - menschliche Haut				20	0.05	1.55	20	69.0271	-0.0441403	69.1598	-0.0328255				69.4188	-0.0215393				69.5833	-0.00887104				69.6465	0.00713867				69.5806	0.0295462				69.3352	0.0620416				68.8329	0.107802				67.9746	0.167803
Schwellenwert				20	0.05	1.6	20	69.0095	-0.0441244	69.1418	-0.0327332				69.3998	-0.0212451				69.5617	-0.00815992				69.619	0.00850024				69.5424	0.0316931				69.2805	0.0648647				68.7571	0.110833				67.8767	0.170212
Kartoffeln				20	0.05	1.65	20	68.9918	-0.0441085	69.1236	-0.0326142				69.3805	-0.0209052				69.5395	-0.00739911				69.5905	0.00989051				69.503	0.0338167				69.2249	0.067588				68.6812	0.113687				67.78	0.172408
				20	0.05	1.7	20	68.9741	-0.0440926	69.1053	-0.0324697				69.3608	-0.0205228				69.5165	-0.00659392				69.561	0.0113029				69.4624	0.0359119				69.1684	0.0702115				68.6051	0.116373				67.6843	0.174408
				20	0.05	1.75	20	68.9561	-0.0440766	69.0867	-0.0323014				69.3407	-0.020101				69.4929	-0.00574948				69.5306	0.0127314				69.4208	0.0379742				69.1111	0.072736				68.529	0.1189				67.5898	0.176225
				20	0.05	1.8	20	68.938	-0.0440605	69.0678	-0.0321106				69.3202	-0.0196432				69.4685	-0.00487069				69.4992	0.0141704				69.3783	0.04				69.0531	0.0751626				68.453	0.121275				67.4966	0.177875
				20	0.05	1.85	20	68.9197	-0.0440442	69.0486	-0.0318991				69.2992	-0.0191526				69.4435	-0.00396226				69.4669	0.0156151				69.3348	0.0419862				68.9946	0.077493				68.3772	0.123507				67.4045	0.179369
				20	0.05	1.9	20	68.9011	-0.0440277	69.0291	-0.0316685				69.2777	-0.0186325				69.4178	-0.00302863				69.4338	0.0170609				69.2905	0.0439304				68.9356	0.0797291				68.3016	0.125603				67.3136	0.18072
				20	0.05	1.95	20	68.8822	-0.044011	69.0092	-0.0314203				69.2557	-0.018086				69.3914	-0.00207401				69.3999	0.0185038				69.2455	0.0458307				68.8762	0.0818733				68.2263	0.12757				67.224	0.181938
				20	0.05	2	20	68.863	-0.043994	68.9889	-0.0311561				69.2332	-0.0175161				69.3643	-0.00110233				69.3652	0.0199401				69.1998	0.0476856				68.8165	0.0839279				68.1513	0.129415				67.1357	0.183032
				20	0.05	2.05	20	68.8435	-0.0439767	68.9682	-0.0308776				69.2102	-0.0169258				69.3366	-0.000117275				69.3298	0.0213666				69.1534	0.0494938				68.7565	0.0858954				68.0767	0.131145				67.0486	0.184013
				20	0.05	2.1	20	68.8235	-0.0439591	68.9471	-0.0305863				69.1867	-0.0163179				69.3083	0.000877719				69.2937	0.0227804				69.1065	0.0512548				68.6963	0.0877785				68.0026	0.132766				66.9627	0.184888
				20	0.05	2.15	20	68.8032	-0.0439412	68.9255	-0.0302837				69.1627	-0.0156949				69.2793	0.00187947				69.257	0.024179				69.059	0.0529678				68.6359	0.0895798				67.9289	0.134284				66.878	0.185664
				20	0.05	2.2	20	68.7824	-0.0439228	68.9035	-0.0299712				69.1381	-0.0150595				69.2497	0.00288505				69.2196	0.02556				69.0111	0.0546327				68.5755	0.0913021				67.8557	0.135705				66.7945	0.186351
				20	0.05	2.25	20	68.7612	-0.0439042	68.881	-0.0296502				69.113	-0.0144141				69.2196	0.00389175				69.1816	0.0269216				68.9628	0.0562494				68.515	0.0929479				67.7831	0.137034				66.7122	0.186952
				20	0.05	2.3	20	68.7395	-0.0438851	68.858	-0.0293219				69.0874	-0.0137608				69.1888	0.00489709				69.1431	0.0282619				68.9141	0.057818				68.4545	0.09452				67.7109	0.138275				66.6312	0.187476
				20	0.05	2.35	20	68.7174	-0.0438655	68.8345	-0.0289876				69.0612	-0.0131017				69.1575	0.0058988				69.1041	0.0295795				68.865	0.0593388				68.3941	0.096021				67.6394	0.139434				66.5512	0.187927
				20	0.05	2.4	20	68.6947	-0.0438456	68.8105	-0.0286486				69.0345	-0.0124389				69.1256	0.00689482				69.0646	0.0308731				68.8157	0.0608121				68.3337	0.0974534				67.5684	0.140515				66.4725	0.18831
				20	0.05	2.45	20	68.6716	-0.0438252	68.786	-0.0283058				69.0072	-0.011774				69.0932	0.00788326				69.0246	0.0321416				68.7661	0.0622385				68.2734	0.0988198				67.498	0.141522				66.3948	0.188631
				20	0.05	2.5	20	68.648	-0.0438044	68.761	-0.0279602				68.9794	-0.0111089				69.0603	0.00886245				68.9842	0.0333842				68.7162	0.0636185				68.2132	0.100123				67.4283	0.14246				66.3183	0.188893
				20	0.05	2.55	20	68.6238	-0.0437832	68.7354	-0.0276129				68.9511	-0.0104449				69.0269	0.00983085				68.9434	0.0345999				68.6662	0.0649528				68.1532	0.101364				67.3591	0.143332				66.2429	0.1891
			0	20	0.05	2.6	20	68.5992	-0.0437614	68.7094	-0.0272648				68.9223	-0.00978353				68.993	0.0107871				68.9022	0.0357882				68.616	0.0662421				68.0934	0.102546				67.2906	0.144141				66.1685	0.189257
		0	70	20	0.05	2.65	20	68.574	-0.0437393	68.6828	-0.0269165				68.893	-0.00912606				68.9586	0.01173				68.8606	0.0369487				68.5657	0.0674872				68.0338	0.103672				67.2226	0.14489				66.0952	0.189367
			0	20	0.05	2.7	20	68.5483	-0.0437166	68.6557	-0.026569				68.8632	-0.00847365				68.9238	0.0126584				68.8187	0.0380808				68.5153	0.0686888				67.9744	0.104743				67.1553	0.145584				66.0229	0.189433
		0	60	20	0.05	2.75	20	68.5221	-0.0436935	68.6281	-0.0262228				68.8329	-0.00782738				68.8885	0.0135715				68.7765	0.0391844				68.4647	0.0698479				67.9152	0.105762				67.0886	0.146224				65.9517	0.189458
				20	0.05	2.8	20	68.4954	-0.0436699	68.6	-0.0258785				68.8021	-0.00718819				68.8529	0.0144683				68.734	0.0402593				68.4141	0.0709653				67.8562	0.10673				67.0226	0.146814				65.8814	0.189445
			0	20	0.05	2.85	20	68.4682	-0.0436459	68.5714	-0.0255369				68.7708	-0.00655695				68.8167	0.0153482				68.6912	0.0413053				68.3635	0.0720418				67.7975	0.107649				66.9571	0.147356				65.8121	0.189395
			100	20	0.05	2.9	20	68.4405	-0.0436214	68.5423	-0.0251983				68.739	-0.00593442				68.7803	0.0162105				68.6482	0.0423224				68.3128	0.0730784				67.7391	0.108522				66.8923	0.147852				65.7438	0.189313
				20	0.05	2.95	20	68.4122	-0.0435964	68.5127	-0.0248633				68.7068	-0.00532129				68.7434	0.0170547				68.6049	0.0433108				68.2621	0.0740759				67.681	0.109349				66.8281	0.148306				65.6764	0.1892
		-1	0	20	0.05	3	20	68.3835	-0.043571	68.4827	-0.0245322				68.6742	-0.00471816				68.7061	0.0178805				68.5614	0.0442704				68.2114	0.0750352				67.6231	0.110133				66.7645	0.148718				65.6099	0.189057
		-1	80	20	0.05	3.05	20	68.3543	-0.0435452	68.4521	-0.0242055				68.6411	-0.00412556				68.6685	0.0186873				68.5177	0.0452014				68.1607	0.0759573				67.5656	0.110875				66.7015	0.149091				65.5444	0.188888
				20	0.05	3.1	20	68.3246	-0.0435189	68.4211	-0.0238835				68.6076	-0.00354395				68.6306	0.019475				68.4738	0.0461042				68.11	0.076843				67.5084	0.111577				66.6392	0.149428				65.4796	0.188693
				20	0.05	3.15	20	68.2944	-0.0434921	68.3896	-0.0235664				68.5736	-0.00297373				68.5923	0.0202433				68.4298	0.0469788				68.0594	0.0776933				67.4514	0.11224				66.5774	0.149729				65.4158	0.188474
				20	0.05	3.2	20	68.2637	-0.0434649	68.3577	-0.0232546				68.5393	-0.00241522				68.5538	0.0209921				68.3855	0.0478256				68.0088	0.0785089				67.3948	0.112866				66.5162	0.149996				65.3528	0.188233
				20	0.05	3.25	20	68.2326	-0.0434374	68.3253	-0.0229482				68.5045	-0.00186871				68.5149	0.0217212				68.3412	0.0486449				67.9583	0.0792908				67.3385	0.113456				66.4556	0.150232				65.2906	0.187972
	zugeführte Wärme	-56.1808		20	0.05	3.3	20	68.201	-0.0434093	68.2926	-0.0226474				68.4694	-0.00133443				68.4757	0.0224307				68.2967	0.049437				67.9079	0.0800398				67.2825	0.114012				66.3955	0.150437				65.2292	0.187691
-10				20	0.05	3.35	20	68.169	-0.0433809	68.2593	-0.0223524				68.4339	-0.00081257				68.4363	0.0231205				68.252	0.0502024				67.8575	0.0807568				67.2268	0.114534				66.3361	0.150613				65.1686	0.187392
200	Ausgleichstemperatur	66.4507		20	0.05	3.4	20	68.1365	-0.0433521	68.2257	-0.0220634				68.3981	-0.00030326				68.3966	0.0237906				68.2073	0.0509414				67.8073	0.0814427				67.1715	0.115024				66.2772	0.150762				65.1087	0.187076
				20	0.05	3.45	20	68.1037	-0.0433229	68.1917	-0.0217805				68.3618	0.000193393				68.3566	0.0244412				68.1624	0.0516545				67.7571	0.0820981				67.1165	0.115483				66.2188	0.150885				65.0496	0.186744
	2.5	0		20	0.05	3.5	20	68.0704	-0.0432933	68.1573	-0.0215036				68.3253	0.000677325				68.3164	0.0250723				68.1175	0.0523419				67.707	0.0827241				67.0618	0.115912				66.161	0.150982				64.9912	0.186397
	2.5	100		20	0.05	3.55	20	68.0367	-0.0432633	68.1225	-0.021233				68.2884	0.0011485				68.276	0.0256841				68.0725	0.0530043				67.6571	0.0833212				67.0074	0.116313				66.1038	0.151055				64.9336	0.186036
	-2.49	0		20	0.05	3.6	20	68.0026	-0.043233	68.0873	-0.0209687				68.2512	0.00160691				68.2353	0.0262767				68.0274	0.0536421				67.6072	0.0838904				66.9534	0.116685				66.047	0.151106				64.8766	0.185662
	-2.49	100		20	0.05	3.65	20	67.9681	-0.0432023	68.0518	-0.0207106				68.2137	0.00205259				68.1944	0.0268504				67.9822	0.0542556				67.5575	0.0844323				66.8996	0.117031				65.9908	0.151135				64.8204	0.185275
				20	0.05	3.7	20	67.9332	-0.0431713	68.0159	-0.0204589				68.1759	0.00248558				68.1534	0.0274053				67.937	0.0548454				67.5079	0.0849478				66.8462	0.117351				65.9352	0.151143				64.7648	0.184878
				20	0.05	3.75	20	67.898	-0.0431399	67.9797	-0.0202134				68.1378	0.00290594				68.1121	0.0279417				67.8917	0.055412				67.4584	0.0854376				66.7931	0.117647				65.88	0.151131				64.7098	0.184469
	Kontakttemperatur			20	0.05	3.8	20	67.8624	-0.0431082	67.9432	-0.0199743				68.0994	0.00331378				68.0707	0.0284598				67.8464	0.0559558				67.409	0.0859023				66.7404	0.117918				65.8253	0.1511				64.6555	0.18405
	54.4941			20	0.05	3.85	20	67.8265	-0.0430762	67.9063	-0.0197414				68.0607	0.00370918				68.029	0.0289599				67.801	0.0564773				67.3598	0.0863427				66.6879	0.118166				65.7711	0.151051				64.6019	0.183622
	54.4941			20	0.05	3.9	20	67.7903	-0.0430439	67.8692	-0.0195148				68.0218	0.00409228				67.9873	0.0294423				67.7557	0.056977				67.3107	0.0867594				66.6358	0.118392				65.7174	0.150984				64.5488	0.183185
	Adiabate Mischungstemperatur			20	0.05	3.95	20	67.7537	-0.0430113	67.8317	-0.0192943				67.9827	0.00446321				67.9453	0.0299072				67.7103	0.0574553				67.2618	0.0871531				66.584	0.118596				65.6641	0.150901				64.4963	0.18274
-10	55.6374			20	0.05	4	20	67.7168	-0.0429783	67.794	-0.01908				67.9433	0.00482212				67.9032	0.030355				67.6648	0.0579128				67.213	0.0875245				66.5325	0.11878				65.6114	0.150802				64.4444	0.182287
200	55.6374			20	0.05	4.05	20	67.6797	-0.0429452	67.7559	-0.0188718				67.9037	0.00516917				67.861	0.0307859				67.6194	0.0583499				67.1643	0.0878743				66.4813	0.118943				65.559	0.150687				64.3931	0.181826
				20	0.05	4.1	20	67.6422	-0.0429117	67.7176	-0.0186696				67.8638	0.00550452				67.8187	0.0312003				67.574	0.0587671				67.1158	0.0882029				66.4304	0.119087				65.5072	0.150559				64.3423	0.181359
	Dicke bis Vol 12 m	0.0025		20	0.05	4.15	20	67.6044	-0.042878	67.6791	-0.0184734				67.8238	0.00582836				67.7762	0.0315985				67.5285	0.0591649				67.0674	0.0885111				66.3798	0.119212				65.4557	0.150416				64.2921	0.180885
	Dicke 13 bis 26	0.0025		20	0.05	4.2	20	67.5664	-0.042844	67.6403	-0.018283				67.7835	0.00614086				67.7336	0.0319808				67.4831	0.0595437				67.0192	0.0887994				66.3295	0.119319				65.4048	0.150259				64.2424	0.180406
		0.005	Masse kg	20	0.05	4.25	20	67.5281	-0.0428098	67.6013	-0.0180984				67.7431	0.00644222				67.6909	0.0323475				67.4377	0.0599039				66.9712	0.0890683				66.2795	0.119409				65.3542	0.15009				64.1933	0.17992
	Volumen links	2.25e-06	0.0023625	20	0.05	4.3	20	67.4896	-0.0427753	67.562	-0.0179195				67.7024	0.00673263				67.6481	0.0326989				67.3923	0.0602461				66.9232	0.0893186				66.2298	0.119481				65.304	0.149909				64.1446	0.17943
	Volumen rechts	2.25e-06	0.002295	20	0.05	4.35	20	67.4508	-0.0427406	67.5225	-0.0177462				67.6616	0.00701229				67.6052	0.0330353				67.3469	0.0605707				66.8755	0.0895506				66.1803	0.119538				65.2543	0.149716				64.0965	0.178934
			0.0046575	20	0.05	4.4	20	67.4118	-0.0427057	67.4829	-0.0175784				67.6207	0.0072814				67.5623	0.0333572				67.3016	0.0608781				66.8279	0.0897649				66.1312	0.119578				65.205	0.149512				64.0488	0.178434
	Mischungstemperatur	55.6374		20	0.05	4.45	20	67.3726	-0.0426706	67.443	-0.0174161				67.5795	0.00754017				67.5192	0.0336647				67.2562	0.0611688				66.7804	0.0899621				66.0823	0.119604				65.156	0.149297				64.0016	0.17793
			Gesamtmasse	20	0.05	4.5	20	67.3331	-0.0426353	67.4029	-0.017259				67.5383	0.00778881				67.4761	0.0339583				67.2109	0.0614432				66.7331	0.0901427				66.0338	0.119615				65.1075	0.149071				63.9549	0.177421
			0.004725	20	0.05	4.55	20	67.2935	-0.0425998	67.3626	-0.0171072				67.4968	0.00802752				67.4329	0.0342382				67.1657	0.0617017				66.686	0.0903071				65.9855	0.119611				65.0593	0.148836				63.9086	0.176909
	Trennfläche	0	0	20	0.05	4.6	20	67.2536	-0.0425641	67.3222	-0.0169605				67.4553	0.00825651				67.3896	0.0345048				67.1205	0.0619447				66.639	0.0904558				65.9375	0.119594				65.0115	0.148591				63.8628	0.176393
		0	0	20	0.05	4.65	20	67.2136	-0.0425283	67.2816	-0.0168188				67.4136	0.00847599				67.3463	0.0347584				67.0753	0.0621727				66.5922	0.0905894				65.8897	0.119564				64.9641	0.148337				63.8174	0.175874
		0	100	20	0.05	4.7	20	67.1734	-0.0424922	67.2408	-0.0166821				67.3718	0.00868617				67.303	0.0349993				67.0301	0.062386				66.5455	0.0907081				65.8422	0.119521				64.9171	0.148074				63.7725	0.175352
	Trennfläche +1	2.69167	0	20	0.05	4.75	20	67.133	-0.0424561	67.1999	-0.0165501				67.3299	0.00888726				67.2595	0.0352278				66.9851	0.0625851				66.499	0.0908126				65.795	0.119466				64.8704	0.147803				63.7279	0.174827
		2.69167	100	20	0.05	4.8	20	67.0925	-0.0424197	67.1588	-0.0164229				67.2878	0.00907946				67.2161	0.0354442				66.94	0.0627703				66.4526	0.0909032				65.748	0.119398				64.824	0.147523				63.6838	0.1743
	Trennfläche -1		0	20	0.05	4.85	20	67.0518	-0.0423832	67.1177	-0.0163003				67.2457	0.00926298				67.1726	0.0356488				66.895	0.062942				66.4064	0.0909803				65.7013	0.11932				64.778	0.147236				63.6401	0.17377
		0	100	20	0.05	4.9	20	67.0109	-0.0423466	67.0763	-0.0161821				67.2035	0.00943803				67.1291	0.0358419				66.8501	0.0631005				66.3603	0.0910444				65.6549	0.11923				64.7323	0.146942				63.5967	0.173238
				20	0.05	4.95	20	66.9699	-0.0423098	67.0349	-0.0160684				67.1612	0.00960481				67.0855	0.0360238				66.8053	0.0632464				66.3144	0.0910958				65.6087	0.119129				64.687	0.146641				63.5538	0.172704
				20	0.05	5	20	66.9288	-0.0422729	66.9933	-0.015959				67.1188	0.00976352				67.042	0.0361948				66.7604	0.0633798				66.2687	0.0911349				65.5627	0.119018				64.642	0.146332				63.5112	0.172167
				20	0.05	5.05	20	66.8876	-0.0422359	66.9517	-0.0158538				67.0763	0.00991435				66.9984	0.0363552				66.7157	0.0635011				66.2231	0.0911621				65.517	0.118897				64.5973	0.146017				63.469	0.171629
				20	0.05	5.1	20	66.8462	-0.0421988	66.9099	-0.0157527				67.0338	0.0100575				66.9548	0.0365052				66.671	0.0636107				66.1777	0.0911778				65.4715	0.118766				64.5529	0.145696				63.4271	0.17109
				20	0.05	5.15	20	66.8047	-0.0421616	66.868	-0.0156557				66.9912	0.0101932				66.9112	0.0366452				66.6264	0.063709				66.1324	0.0911824				65.4263	0.118626				64.5088	0.145369				63.3856	0.170549
				20	0.05	5.2	20	66.7632	-0.0421243	66.8261	-0.0155625				66.9485	0.0103216				66.8676	0.0367754				66.5819	0.0637962				66.0873	0.0911761				65.3813	0.118477				64.465	0.145037				63.3445	0.170006
				20	0.05	5.25	20	66.7215	-0.0420868	66.784	-0.0154731				66.9058	0.0104428				66.824	0.036896				66.5374	0.0638726				66.0423	0.0911593				65.3366	0.118319				64.4216	0.144698				63.3037	0.169463
				20	0.05	5.3	20	66.6797	-0.0420493	66.7419	-0.0153875				66.863	0.0105572				66.7804	0.0370074				66.4931	0.0639386				65.9975	0.0911323				65.292	0.118153				64.3784	0.144355				63.2632	0.168918
				20	0.05	5.35	20	66.6379	-0.0420118	66.6997	-0.0153055				66.8202	0.0106648				66.7369	0.0371098				66.4488	0.0639945				65.9528	0.0910955				65.2477	0.117979				64.3355	0.144006				63.223	0.168372
				20	0.05	5.4	20	66.5959	-0.0419741	66.6575	-0.015227				66.7774	0.0107658				66.6933	0.0372033				66.4045	0.0640405				65.9083	0.0910491				65.2036	0.117797				64.2929	0.143653				63.1832	0.167826
				20	0.05	5.45	20	66.5539	-0.0419364	66.6152	-0.015152				66.7345	0.0108604				66.6497	0.0372884				66.3604	0.064077				65.8639	0.0909936				65.1598	0.117607				64.2505	0.143294				63.1437	0.167279
				20	0.05	5.5	20	66.5119	-0.0418986	66.5728	-0.0150803				66.6916	0.0109489				66.6062	0.0373651				66.3163	0.0641042				65.8197	0.090929				65.1161	0.11741				64.2085	0.142932				63.1044	0.16673
				20	0.05	5.55	20	66.4698	-0.0418607	66.5304	-0.0150119				66.6487	0.0110312				66.5627	0.0374338				66.2723	0.0641225				65.7757	0.0908558				65.0727	0.117206				64.1667	0.142565				63.0655	0.166182
				20	0.05	5.6	20	66.4276	-0.0418228	66.488	-0.0149467				66.6058	0.0111077				66.5192	0.0374947				66.2284	0.064132				65.7318	0.0907742				65.0295	0.116995				64.1252	0.142194				63.0269	0.165633
				20	0.05	5.65	20	66.3853	-0.0417848	66.4455	-0.0148846				66.5628	0.0111785				66.4757	0.037548				66.1846	0.064133				65.688	0.0906845				64.9865	0.116778				64.0839	0.14182				62.9886	0.165083
				20	0.05	5.7	20	66.343	-0.0417468	66.403	-0.0148255				66.5198	0.0112437				66.4323	0.0375939				66.1409	0.0641259				65.6444	0.090587				64.9437	0.116554				64.0429	0.141441				62.9505	0.164533
				20	0.05	5.75	20	66.3007	-0.0417087	66.3604	-0.0147693				66.4769	0.0113035				66.3889	0.0376326				66.0972	0.0641108				65.6009	0.0904818				64.9011	0.116324				64.0021	0.141059				62.9127	0.163983
				20	0.05	5.8	20	66.2584	-0.0416707	66.3179	-0.014716				66.4339	0.011358				66.3456	0.0376643				66.0537	0.064088				65.5576	0.0903693				64.8587	0.116088				63.9616	0.140674				62.8752	0.163433
				20	0.05	5.85	20	66.216	-0.0416325	66.2753	-0.0146655				66.3909	0.0114075				66.3022	0.0376893				66.0102	0.0640577				65.5145	0.0902497				64.8165	0.115847				63.9213	0.140285				62.838	0.162883
				20	0.05	5.9	20	66.1736	-0.0415944	66.2327	-0.0146177				66.348	0.0114519				66.259	0.0377077				65.9669	0.0640201				65.4714	0.0901231				64.7745	0.1156				63.8813	0.139893				62.801	0.162332
				20	0.05	5.95	20	66.1311	-0.0415562	66.19	-0.0145725				66.305	0.0114915				66.2158	0.0377198				65.9236	0.0639756				65.4286	0.08999				64.7328	0.115348				63.8415	0.139499				62.7643	0.161782
				20	0.05	6	20	66.0887	-0.041518	66.1474	-0.0145299				66.2621	0.0115265				66.1726	0.0377256				65.8804	0.0639242				65.3858	0.0898504				64.6912	0.115091				63.8019	0.139101				62.7278	0.161232
				20	0.05	6.05	20	66.0462	-0.0414798	66.1048	-0.0144897				66.2191	0.0115569				66.1294	0.0377255				65.8373	0.0638662				65.3433	0.0897045				64.6497	0.114829				63.7626	0.138701				62.6916	0.160682
				20	0.05	6.1	20	66.0037	-0.0414416	66.0622	-0.014452				66.1762	0.0115828				66.0864	0.0377196				65.7944	0.0638019				65.3008	0.0895527				64.6085	0.114563				63.7234	0.138299				62.6556	0.160132
				20	0.05	6.15	20	65.9613	-0.0414034	66.0195	-0.0144166				66.1334	0.0116045				66.0433	0.037708				65.7515	0.0637313				65.2585	0.0893951				64.5675	0.114292				63.6845	0.137894				62.6198	0.159582
				20	0.05	6.2	20	65.9188	-0.0413651	65.9769	-0.0143835				66.0905	0.011622				66.0004	0.0376909				65.7087	0.0636548				65.2164	0.0892318				64.5266	0.114016				63.6459	0.137486				62.5843	0.159033
				20	0.05	6.25	20	65.8763	-0.0413269	65.9343	-0.0143527				66.0477	0.0116355				65.9575	0.0376686				65.666	0.0635725				65.1744	0.0890631				64.486	0.113737				63.6074	0.137077				62.549	0.158484
				20	0.05	6.3	20	65.8338	-0.0412887	65.8917	-0.014324				66.0049	0.0116451				65.9146	0.0376411				65.6234	0.0634845				65.1325	0.0888892				64.4455	0.113453				63.5691	0.136666				62.514	0.157935
				20	0.05	6.35	20	65.7914	-0.0412504	65.8492	-0.0142973				65.9621	0.0116508				65.8719	0.0376086				65.5809	0.0633911				65.0908	0.0887102				64.4052	0.113165				63.5311	0.136252				62.4792	0.157387
				20	0.05	6.4	20	65.7489	-0.0412122	65.8066	-0.0142727				65.9194	0.0116529				65.8291	0.0375713				65.5385	0.0632925				65.0492	0.0885263				64.3651	0.112874				63.4932	0.135837				62.4445	0.15684
				20	0.05	6.45	20	65.7065	-0.041174	65.7641	-0.0142501				65.8767	0.0116513				65.7865	0.0375293				65.4962	0.0631888				65.0077	0.0883378				64.3251	0.112579				63.4556	0.13542				62.4101	0.156293
				20	0.05	6.5	20	65.6641	-0.0411358	65.7216	-0.0142294				65.834	0.0116463				65.7439	0.0374828				65.454	0.0630802				64.9664	0.0881447				64.2853	0.112281				63.4182	0.135001				62.3759	0.155747
				20	0.05	6.55	20	65.6217	-0.0410977	65.6791	-0.0142106				65.7914	0.011638				65.7014	0.0374319				65.412	0.0629668				64.9252	0.0879472				64.2457	0.11198				63.3809	0.134581				62.342	0.155201
				20	0.05	6.6	20	65.5793	-0.0410595	65.6367	-0.0141935				65.7489	0.0116264				65.659	0.0373768				65.37	0.0628488				64.8842	0.0877454				64.2063	0.111675				63.3439	0.134159				62.3082	0.154656
				20	0.05	6.65	20	65.537	-0.0410214	65.5943	-0.0141783				65.7064	0.0116116				65.6166	0.0373175				65.3281	0.0627263				64.8433	0.0875396				64.167	0.111367				63.307	0.133736				62.2746	0.154112
				20	0.05	6.7	20	65.4947	-0.0409833	65.5519	-0.0141647				65.6639	0.0115937				65.5743	0.0372543				65.2863	0.0625996				64.8026	0.0873299				64.1279	0.111057				63.2703	0.133312				62.2412	0.153568
				20	0.05	6.75	20	65.4524	-0.0409452	65.5096	-0.0141528				65.6215	0.0115729				65.5321	0.0371872				65.2447	0.0624687				64.7619	0.0871164				64.089	0.110744				63.2338	0.132887				62.208	0.153025
				20	0.05	6.8	20	65.4102	-0.0409072	65.4674	-0.0141424				65.5792	0.0115492				65.49	0.0371164				65.2031	0.0623338				64.7215	0.0868993				64.0502	0.110428				63.1975	0.13246				62.175	0.152484
				20	0.05	6.85	20	65.368	-0.0408692	65.4251	-0.0141337				65.5369	0.0115227				65.4479	0.037042				65.1616	0.0621951				64.6811	0.0866786				64.0116	0.110109				63.1614	0.132033				62.1422	0.151943
				20	0.05	6.9	20	65.3258	-0.0408312	65.383	-0.0141264				65.4947	0.0114935				65.4059	0.036964				65.1203	0.0620526				64.6409	0.0864546				63.9731	0.109789				63.1254	0.131604				62.1096	0.151402
				20	0.05	6.95	20	65.2837	-0.0407933	65.3408	-0.0141206				65.4525	0.0114617				65.364	0.0368827				65.0791	0.0619065				64.6008	0.0862273				63.9348	0.109465				63.0896	0.131175				62.0771	0.150863
				20	0.05	7	20	65.2417	-0.0407554	65.2988	-0.0141162				65.4104	0.0114274				65.3222	0.0367982				65.0379	0.0617569				64.5609	0.0859969				63.8967	0.10914				63.054	0.130745				62.0449	0.150325
				20	0.05	7.05	20	65.1997	-0.0407175	65.2567	-0.0141132				65.3684	0.0113906				65.2805	0.0367105				64.9969	0.0616039				64.521	0.0857634				63.8587	0.108813				63.0186	0.130314				62.0128	0.149788
				20	0.05	7.1	20	65.1577	-0.0406797	65.2148	-0.0141115				65.3264	0.0113515				65.2388	0.0366197				64.956	0.0614477				64.4814	0.0855272				63.8209	0.108483				62.9833	0.129882				61.9809	0.149251
				20	0.05	7.15	20	65.1158	-0.040642	65.1729	-0.0141112				65.2845	0.01131				65.1973	0.036526				64.9152	0.0612884				64.4418	0.0852881				63.7832	0.108152				62.9482	0.12945				61.9491	0.148716
				20	0.05	7.2	20	65.074	-0.0406042	65.131	-0.014112				65.2427	0.0112664				65.1558	0.0364295				64.8745	0.0611261				64.4024	0.0850463				63.7457	0.107819				62.9133	0.129018				61.9175	0.148182
				20	0.05	7.25	20	65.0322	-0.0405666	65.0892	-0.0141141				65.201	0.0112206				65.1144	0.0363302				64.8339	0.0609609				64.3631	0.0848021				63.7083	0.107484				62.8785	0.128585				61.8861	0.147649
				20	0.05	7.3	20	64.9905	-0.040529	65.0475	-0.0141174				65.1593	0.0111727				65.0731	0.0362283				64.7934	0.0607929				64.3239	0.0845553				63.671	0.107147				62.8439	0.128151				61.8548	0.147117
				20	0.05	7.35	20	64.9488	-0.0404914	65.0059	-0.0141218				65.1177	0.0111228				65.0319	0.0361238				64.753	0.0606222				64.2849	0.0843063				63.634	0.106809				62.8094	0.127717				61.8237	0.146586
				20	0.05	7.4	20	64.9072	-0.0404539	64.9643	-0.0141273				65.0761	0.011071				64.9908	0.0360168				64.7127	0.0604489				64.246	0.0840549				63.597	0.10647				62.7751	0.127283				61.7928	0.146056
				20	0.05	7.45	20	64.8657	-0.0404165	64.9228	-0.0141338				65.0347	0.0110172				64.9498	0.0359075				64.6726	0.0602731				64.2072	0.0838014				63.5602	0.106129				62.741	0.126849				61.762	0.145528
				20	0.05	7.5	20	64.8242	-0.0403791	64.8814	-0.0141414				64.9933	0.0109617				64.9089	0.0357958				64.6325	0.0600949				64.1686	0.0835459				63.5236	0.105787				62.707	0.126415				61.7314	0.145
				20	0.05	7.55	20	64.7828	-0.0403418	64.84	-0.01415				64.952	0.0109045				64.868	0.035682				64.5926	0.0599144				64.13	0.0832884				63.4871	0.105444				62.6732	0.12598				61.7009	0.144474
				20	0.05	7.6	20	64.7415	-0.0403045	64.7987	-0.0141596				64.9108	0.0108455				64.8273	0.035566				64.5528	0.0597317				64.0916	0.083029				63.4507	0.105099				62.6395	0.125545				61.6706	0.143949
				20	0.05	7.65	20	64.7002	-0.0402673	64.7575	-0.0141701				64.8697	0.0107849				64.7866	0.0354479				64.5131	0.0595469				64.0534	0.0827678				63.4144	0.104754				62.6059	0.125111				61.6404	0.143425
				20	0.05	7.7	20	64.659	-0.0402302	64.7163	-0.0141815				64.8286	0.0107228				64.7461	0.0353279				64.4735	0.05936				64.0152	0.082505				63.3783	0.104407				62.5725	0.124676				61.6104	0.142903
				20	0.05	7.75	20	64.6179	-0.0401931	64.6753	-0.0141938				64.7877	0.0106591				64.7056	0.035206				64.434	0.0591712				63.9772	0.0822404				63.3424	0.104059				62.5392	0.124241				61.5805	0.142382
				20	0.05	7.8	20	64.5769	-0.0401561	64.6343	-0.0142069				64.7468	0.010594				64.6653	0.0350822				64.3946	0.0589805				63.9393	0.0819744				63.3066	0.103711				62.5061	0.123807				61.5507	0.141862
				20	0.05	7.85	20	64.5359	-0.0401192	64.5934	-0.0142209				64.706	0.0105274				64.625	0.0349567				64.3553	0.058788				63.9015	0.0817068				63.2709	0.103362				62.4731	0.123373				61.5211	0.141344
				20	0.05	7.9	20	64.495	-0.0400823	64.5526	-0.0142357				64.6653	0.0104595				64.5849	0.0348294				64.3161	0.0585938				63.8639	0.0814379				63.2353	0.103012				62.4403	0.122939				61.4916	0.140827
				20	0.05	7.95	20	64.4542	-0.0400455	64.5118	-0.0142512				64.6247	0.0103903				64.5448	0.0347006				64.2771	0.058398				63.8264	0.0811676				63.1999	0.102661				62.4076	0.122505				61.4623	0.140311
				20	0.05	8	20	64.4135	-0.0400088	64.4712	-0.0142674				64.5842	0.0103198				64.5048	0.0345701				64.2381	0.0582005				63.789	0.0808961				63.1646	0.10231				62.375	0.122071				61.4331	0.139796
				20	0.05	8.05	20	64.3728	-0.0399721	64.4306	-0.0142844				64.5438	0.0102481				64.465	0.0344382				64.1993	0.0580016				63.7517	0.0806234				63.1294	0.101958				62.3426	0.121638				61.404	0.139283
				20	0.05	8.1	20	64.3323	-0.0399356	64.3901	-0.0143021				64.5034	0.0101752				64.4252	0.0343048				64.1606	0.0578012				63.7145	0.0803495				63.0944	0.101606				62.3103	0.121205				61.375	0.138772
				20	0.05	8.15	20	64.2918	-0.0398991	64.3497	-0.0143204				64.4632	0.0101012				64.3855	0.0341701				64.122	0.0575994				63.6775	0.0800746				63.0595	0.101253				62.2781	0.120773				61.3462	0.138262
				20	0.05	8.2	20	64.2514	-0.0398626	64.3094	-0.0143394				64.423	0.0100261				64.346	0.034034				64.0835	0.0573964				63.6406	0.0797987				63.0247	0.1009				62.2461	0.12034				61.3175	0.137753
				20	0.05	8.25	20	64.2111	-0.0398263	64.2692	-0.014359				64.3829	0.00995				64.3065	0.0338966				64.0451	0.057192				63.6038	0.0795218				62.9901	0.100547				62.2142	0.119909				61.2889	0.137245
				20	0.05	8.3	20	64.1709	-0.03979	64.229	-0.0143793				64.343	0.00987287				64.2671	0.033758				64.0068	0.0569865				63.5671	0.0792441				62.9556	0.100193				62.1824	0.119478				61.2605	0.13674
				20	0.05	8.35	20	64.1308	-0.0397538	64.189	-0.0144001				64.3031	0.00979477				64.2279	0.0336183				63.9686	0.0567799				63.5305	0.0789656				62.9212	0.0998387				62.1507	0.119047				61.2322	0.136235
				20	0.05	8.4	20	64.0907	-0.0397177	64.149	-0.0144214				64.2633	0.00971575				64.1887	0.0334774				63.9306	0.0565722				63.4941	0.0786862				62.8869	0.0994845				62.1192	0.118617				61.2039	0.135732
				20	0.05	8.45	20	64.0508	-0.0396817	64.1092	-0.0144433				64.2236	0.00963584				64.1496	0.0333355				63.8926	0.0563635				63.4577	0.0784062				62.8527	0.09913				62.0878	0.118188				61.1759	0.135231
				20	0.05	8.5	20	64.0109	-0.0396457	64.0694	-0.0144657				64.1841	0.00955508				64.1107	0.0331926				63.8548	0.0561538				63.4215	0.0781255				62.8187	0.0987754				62.0565	0.117759				61.1479	0.134731
				20	0.05	8.55	20	63.9712	-0.0396098	64.0297	-0.0144886				64.1446	0.0094735				64.0718	0.0330486				63.817	0.0559432				63.3854	0.0778442				62.7848	0.0984208				62.0253	0.117331				61.12	0.134232
				20	0.05	8.6	20	63.9315	-0.039574	63.9902	-0.014512				64.1052	0.00939114				64.0331	0.0329038				63.7794	0.0557318				63.3495	0.0775624				62.751	0.0980661				61.9943	0.116903				61.0923	0.133735
				20	0.05	8.65	20	63.8919	-0.0395383	63.9507	-0.0145359				64.0659	0.00930803				63.9944	0.0327581				63.7419	0.0555195				63.3136	0.07728				62.7173	0.0977114				61.9634	0.116477				61.0647	0.13324
				20	0.05	8.7	20	63.8524	-0.0395027	63.9113	-0.0145602				64.0267	0.00922421				63.9559	0.0326115				63.7045	0.0553065				63.2778	0.0769972				62.6838	0.0973568				61.9326	0.11605				61.0372	0.132746
				20	0.05	8.75	20	63.813	-0.0394672	63.872	-0.014585				63.9876	0.0091397				63.9175	0.0324642				63.6672	0.0550928				63.2422	0.0767139				62.6503	0.0970023				61.9019	0.115625				61.0097	0.132253
				20	0.05	8.8	20	63.7737	-0.0394317	63.8328	-0.0146101				63.9486	0.00905454				63.8791	0.0323161				63.63	0.0548784				63.2067	0.0764303				62.617	0.0966478				61.8713	0.115201				60.9825	0.131762
				20	0.05	8.85	20	63.7345	-0.0393963	63.7937	-0.0146357				63.9097	0.00896875				63.8409	0.0321673				63.5929	0.0546633				63.1713	0.0761463				62.5838	0.0962935				61.8408	0.114777				60.9553	0.131273
				20	0.05	8.9	20	63.6954	-0.039361	63.7546	-0.0146616				63.8709	0.00888236				63.8028	0.0320178				63.556	0.0544477				63.136	0.075862				62.5507	0.0959394				61.8105	0.114354				60.9282	0.130785
				20	0.05	8.95	20	63.6564	-0.0393258	63.7157	-0.0146879				63.8322	0.00879541				63.7647	0.0318676				63.5191	0.0542316				63.1008	0.0755775				62.5177	0.0955856				61.7803	0.113932				60.9012	0.130299
				20	0.05	9	20	63.6174	-0.0392907	63.6769	-0.0147146				63.7936	0.00870792				63.7268	0.0317169				63.4824	0.0540149				63.0657	0.0752928				62.4849	0.0952319				61.7501	0.113511				60.8743	0.129815
				20	0.05	9.05	20	63.5786	-0.0392557	63.6382	-0.0147416				63.7551	0.00861992				63.689	0.0315656				63.4457	0.0537978				63.0308	0.0750079				62.4521	0.0948786				61.7201	0.11309				60.8476	0.129332
				20	0.05	9.1	20	63.5399	-0.0392207	63.5996	-0.0147689				63.7167	0.00853142				63.6513	0.0314138				63.4092	0.0535803				62.9959	0.0747229				62.4195	0.0945256				61.6902	0.112671				60.8209	0.12885
				20	0.05	9.15	20	63.5012	-0.0391859	63.5611	-0.0147965				63.6784	0.00844247				63.6137	0.0312614				63.3728	0.0533624				62.9612	0.0744377				62.387	0.0941729				61.6604	0.112253				60.7943	0.12837
				20	0.05	9.2	20	63.4627	-0.0391511	63.5226	-0.0148245				63.6402	0.00835307				63.5762	0.0311086				63.3364	0.0531441				62.9266	0.0741525				62.3546	0.0938206				61.6307	0.111835				60.7679	0.127892
				20	0.05	9.25	20	63.4243	-0.0391164	63.4843	-0.0148527				63.6021	0.00826327				63.5388	0.0309554				63.3002	0.0529255				62.8921	0.0738673				62.3222	0.0934687				61.6011	0.111419				60.7415	0.127416
				20	0.05	9.3	20	63.3859	-0.0390819	63.4461	-0.0148812				63.5641	0.00817306				63.5015	0.0308017				63.2641	0.0527067				62.8577	0.073582				62.2901	0.0931172				61.5717	0.111003				60.7153	0.126941
				20	0.05	9.35	20	63.3477	-0.0390473	63.408	-0.0149099				63.5262	0.00808249				63.4643	0.0306477				63.2281	0.0524876				62.8234	0.0732968				62.258	0.0927662				61.5423	0.110588				60.6891	0.126467
				20	0.05	9.4	20	63.3096	-0.0390129	63.37	-0.0149389				63.4884	0.00799157				63.4272	0.0304933				63.1923	0.0522682				62.7892	0.0730117				62.226	0.0924156				61.513	0.110175				60.663	0.125995
				20	0.05	9.45	20	63.2715	-0.0389786	63.332	-0.0149682				63.4507	0.00790033				63.3902	0.0303386				63.1565	0.0520487				62.7551	0.0727266				62.1941	0.0920656				61.4839	0.109762				60.637	0.125525
				20	0.05	9.5	20	63.2336	-0.0389444	63.2942	-0.0149977				63.4131	0.00780877				63.3533	0.0301837				63.1208	0.051829				62.7211	0.0724417				62.1623	0.0917161				61.4548	0.109351				60.6111	0.125057
				20	0.05	9.55	20	63.1957	-0.0389102	63.2565	-0.0150273				63.3756	0.00771694				63.3166	0.0300284				63.0852	0.0516093				62.6873	0.0721569				62.1307	0.0913671				61.4258	0.10894				60.5854	0.12459
				20	0.05	9.6	20	63.158	-0.0388762	63.2189	-0.0150572				63.3382	0.00762483				63.2799	0.0298729				63.0498	0.0513894				62.6535	0.0718723				62.0991	0.0910187				61.397	0.108531				60.5597	0.124125
				20	0.05	9.65	20	63.1204	-0.0388422	63.1813	-0.0150873				63.301	0.00753248				63.2433	0.0297172				63.0144	0.0511694				62.6199	0.0715878				62.0677	0.0906709				61.3682	0.108123				60.534	0.123661
				20	0.05	9.7	20	63.0828	-0.0388083	63.1439	-0.0151176				63.2638	0.00743989				63.2069	0.0295613				62.9792	0.0509494				62.5863	0.0713037				62.0363	0.0903238				61.3395	0.107716				60.5085	0.123199
				20	0.05	9.75	20	63.0454	-0.0387745	63.1066	-0.015148				63.2267	0.00734709				63.1705	0.0294053				62.944	0.0507294				62.5529	0.0710197				62.0051	0.0899772				61.311	0.107309				60.4831	0.122739
				20	0.05	9.8	20	63.008	-0.0387408	63.0694	-0.0151786				63.1897	0.0072541				63.1343	0.029249				62.909	0.0505094				62.5195	0.0707361				61.974	0.0896314				61.2825	0.106905				60.4578	0.12228
				20	0.05	9.85	20	62.9708	-0.0387072	63.0323	-0.0152094				63.1529	0.00716093				63.0981	0.0290927				62.8741	0.0502894				62.4863	0.0704527				61.9429	0.0892862				61.2541	0.106501				60.4325	0.121824
				20	0.05	9.9	20	62.9337	-0.0386737	62.9953	-0.0152403				63.1161	0.0070676				63.0621	0.0289363				62.8392	0.0500695				62.4532	0.0701697				61.912	0.0889416				61.2259	0.106098				60.4073	0.121368
				20	0.05	9.95	20	62.8966	-0.0386403	62.9584	-0.0152714				63.0794	0.00697412				63.0262	0.0287798				62.8045	0.0498496				62.4202	0.069887				61.8811	0.0885979				61.1977	0.105697				60.3823	0.120915
				20	0.05	10	20	62.8597	-0.038607	62.9216	-0.0153026				63.0429	0.00688051				62.9903	0.0286232				62.7699	0.0496299				62.3872	0.0696047				61.8504	0.0882548				61.1696	0.105296				60.3573	0.120463
				20	0.05	10.05	20	62.8229	-0.0385737	62.8849	-0.0153339				63.0064	0.00678678				62.9546	0.0284666				62.7354	0.0494103				62.3544	0.0693228				61.8198	0.0879125				61.1416	0.104897				60.3324	0.120012
				20	0.05	10.1	20	62.7861	-0.0385406	62.8483	-0.0153653				62.9701	0.00669296				62.919	0.0283099				62.701	0.0491908				62.3217	0.0690413				61.7892	0.0875709				61.1137	0.104499				60.3075	0.119564
				20	0.05	10.15	20	62.7495	-0.0385075	62.8118	-0.0153968				62.9338	0.00659904				62.8835	0.0281533				62.6666	0.0489715				62.2891	0.0687602				61.7588	0.0872302				61.0859	0.104103				60.2828	0.119117
				20	0.05	10.2	20	62.713	-0.0384746	62.7754	-0.0154285				62.8977	0.00650505				62.848	0.0279966				62.6324	0.0487524				62.2566	0.0684796				61.7284	0.0868902				61.0582	0.103707				60.2581	0.118671
				20	0.05	10.25	20	62.6766	-0.0384417	62.7391	-0.0154602				62.8616	0.006411				62.8127	0.0278401				62.5983	0.0485335				62.2242	0.0681994				61.6982	0.086551				61.0306	0.103313				60.2335	0.118228
				20	0.05	10.3	20	62.6402	-0.0384089	62.7029	-0.015492				62.8257	0.00631691				62.7775	0.0276835				62.5643	0.0483148				62.1919	0.0679197				61.6681	0.0862127				61.003	0.10292				60.209	0.117786
				20	0.05	10.35	20	62.604	-0.0383762	62.6668	-0.0155239				62.7899	0.00622278				62.7424	0.027527				62.5304	0.0480964				62.1597	0.0676405				61.638	0.0858752				60.9756	0.102528				60.1846	0.117346
				20	0.05	10.4	20	62.5679	-0.0383436	62.6308	-0.0155559				62.7541	0.00612862				62.7074	0.0273706				62.4966	0.0478782				62.1275	0.0673618				61.608	0.0855386				60.9482	0.102137				60.1603	0.116907
				20	0.05	10.45	20	62.5319	-0.0383111	62.5949	-0.0155879				62.7185	0.00603445				62.6725	0.0272143				62.4629	0.0476603				62.0955	0.0670837				61.5782	0.0852028				60.921	0.101748				60.136	0.11647
				20	0.05	10.5	20	62.496	-0.0382787	62.5591	-0.01562				62.6829	0.00594029				62.6377	0.0270581				62.4293	0.0474427				62.0636	0.0668061				61.5484	0.0848679				60.8938	0.10136				60.1118	0.116035
				20	0.05	10.55	20	62.4601	-0.0382464	62.5234	-0.0156521				62.6475	0.00584613				62.603	0.0269021				62.3958	0.0472254				62.0318	0.0665291				61.5187	0.0845339				60.8667	0.100973				60.0877	0.115601
				20	0.05	10.6	20	62.4244	-0.0382141	62.4878	-0.0156843				62.6122	0.005752				62.5684	0.0267462				62.3625	0.0470084				62.0001	0.0662527				61.4892	0.0842007				60.8397	0.100588				60.0637	0.11517
				20	0.05	10.65	20	62.3888	-0.038182	62.4523	-0.0157166				62.577	0.0056579				62.5339	0.0265904				62.3292	0.0467917				61.9685	0.0659768				61.4597	0.0838685				60.8128	0.100204				60.0397	0.114739
				20	0.05	10.7	20	62.3533	-0.0381499	62.417	-0.0157488				62.5418	0.00556384				62.4995	0.0264348				62.296	0.0465755				61.937	0.0657016				61.4303	0.0835373				60.7859	0.0998207				60.0158	0.114311
				20	0.05	10.75	20	62.3179	-0.038118	62.3817	-0.0157811				62.5068	0.00546984				62.4652	0.0262794				62.2629	0.0463595				61.9055	0.0654269				61.401	0.0832069				60.7592	0.099439				59.992	0.113884
				20	0.05	10.8	20	62.2826	-0.0380861	62.3465	-0.0158134				62.4719	0.0053759				62.431	0.0261242				62.2299	0.046144				61.8742	0.065153				61.3718	0.0828775				60.7325	0.0990587				59.9683	0.113459
				20	0.05	10.85	20	62.2474	-0.0380543	62.3114	-0.0158458				62.4371	0.00528203				62.3969	0.0259691				62.197	0.0459289				61.843	0.0648796				61.3426	0.082549				60.7059	0.0986796				59.9447	0.113035
				20	0.05	10.9	20	62.2123	-0.0380226	62.2765	-0.0158782				62.4024	0.00518824				62.3629	0.0258143				62.1642	0.0457141				61.8118	0.0646069				61.3136	0.0822216				60.6794	0.0983019				59.9211	0.112614
				20	0.05	10.95	20	62.1773	-0.0379911	62.2416	-0.0159105				62.3677	0.00509454				62.329	0.0256598				62.1315	0.0454998				61.7808	0.0643349				61.2847	0.081895				60.653	0.0979255				59.8976	0.112193
				20	0.05	11	20	62.1424	-0.0379595	62.2068	-0.0159429				62.3332	0.00500093				62.2952	0.0255054				62.0989	0.045286				61.7498	0.0640636				61.2558	0.0815695				60.6267	0.0975504				59.8741	0.111775
				20	0.05	11.05	20	62.1076	-0.0379281	62.1721	-0.0159753				62.2988	0.00490744				62.2615	0.0253514				62.0664	0.0450725				61.719	0.0637929				61.2271	0.081245				60.6004	0.0971766				59.8507	0.111358
				20	0.05	11.1	20	62.0729	-0.0378968	62.1376	-0.0160077				62.2645	0.00481406				62.2279	0.0251975				62.034	0.0448596				61.6882	0.063523				61.1984	0.0809214				60.5742	0.0968042				59.8274	0.110943
				20	0.05	11.15	20	62.0383	-0.0378656	62.1031	-0.01604				62.2303	0.0047208				62.1944	0.025044				62.0017	0.044647				61.6576	0.0632538				61.1698	0.0805988				60.5481	0.096433				59.8042	0.11053
				20	0.05	11.2	20	62.0038	-0.0378344	62.0687	-0.0160724				62.1962	0.00462767				62.161	0.0248907				61.9695	0.044435				61.627	0.0629853				61.1413	0.0802773				60.5221	0.0960633				59.781	0.110118
				20	0.05	11.25	20	61.9694	-0.0378034	62.0345	-0.0161047				62.1621	0.00453467				62.1277	0.0247378				61.9374	0.0442235				61.5965	0.0627175				61.1129	0.0799568				60.4962	0.0956948				59.7579	0.109708
				20	0.05	11.3	20	61.9351	-0.0377724	62.0003	-0.016137				62.1282	0.00444182				62.0945	0.0245851				61.9053	0.0440124				61.5661	0.0624505				61.0846	0.0796373				60.4703	0.0953277				59.7349	0.109299
				20	0.05	11.35	20	61.9009	-0.0377416	61.9662	-0.0161693				62.0944	0.00434912				62.0614	0.0244327				61.8734	0.0438019				61.5358	0.0621842				61.0563	0.0793188				60.4445	0.0949619				59.712	0.108893
				20	0.05	11.4	20	61.8668	-0.0377108	61.9322	-0.0162016				62.0607	0.00425658				62.0284	0.0242807				61.8416	0.0435919				61.5056	0.0619187				61.0282	0.0790014				60.4188	0.0945975				59.6891	0.108488
				20	0.05	11.45	20	61.8328	-0.0376801	61.8984	-0.0162338				62.0271	0.0041642				61.9955	0.024129				61.8099	0.0433824				61.4755	0.0616539				61.0001	0.078685				60.3932	0.0942344				59.6662	0.108084
				20	0.05	11.5	20	61.7988	-0.0376495	61.8646	-0.016266				61.9936	0.00407199				61.9627	0.0239776				61.7782	0.0431734				61.4455	0.0613899				60.9721	0.0783697				60.3677	0.0938727				59.6435	0.107682
				20	0.05	11.55	20	61.765	-0.037619	61.8309	-0.0162982				61.9601	0.00397996				61.93	0.0238265				61.7467	0.042965				61.4156	0.0611267				60.9442	0.0780554				60.3422	0.0935123				59.6208	0.107282
				20	0.05	11.6	20	61.7313	-0.0375885	61.7973	-0.0163303				61.9268	0.00388811				61.8974	0.0236758				61.7152	0.0427571				61.3857	0.0608643				60.9164	0.0777422				60.3168	0.0931533				59.5982	0.106884
				20	0.05	11.65	20	61.6977	-0.0375582	61.7639	-0.0163624				61.8936	0.00379645				61.8649	0.0235255				61.6839	0.0425498				61.356	0.0606027				60.8887	0.07743				60.2915	0.0927956				59.5756	0.106487
				20	0.05	11.7	20	61.6642	-0.037528	61.7305	-0.0163944				61.8605	0.00370498				61.8325	0.0233755				61.6526	0.0423431				61.3263	0.0603419				60.861	0.0771189				60.2662	0.0924393				59.5531	0.106092
				20	0.05	11.75	20	61.6308	-0.0374978	61.6972	-0.0164264				61.8274	0.0036137				61.8002	0.0232259				61.6214	0.0421369				61.2967	0.0600819				60.8335	0.0768089				60.241	0.0920844				59.5307	0.105698
				20	0.05	11.8	20	61.5975	-0.0374677	61.664	-0.0164583				61.7945	0.00352264				61.7679	0.0230767				61.5904	0.0419313				61.2672	0.0598227				60.806	0.0765				60.2159	0.0917308				59.5083	0.105306
				20	0.05	11.85	20	61.5643	-0.0374378	61.6309	-0.0164902				61.7617	0.00343178				61.7358	0.0229278				61.5594	0.0417263				61.2378	0.0595643				60.7786	0.0761922				60.1909	0.0913785				59.486	0.104916
				20	0.05	11.9	20	61.5312	-0.0374079	61.598	-0.016522				61.7289	0.00334113				61.7038	0.0227794				61.5285	0.0415219				61.2085	0.0593068				60.7512	0.0758854				60.1659	0.0910277				59.4637	0.104528
				20	0.05	11.95	20	61.4982	-0.0373781	61.5651	-0.0165538				61.6963	0.0032507				61.6718	0.0226313				61.4977	0.0413181				61.1793	0.0590501				60.724	0.0755797				60.1411	0.0906782				59.4415	0.104141
				20	0.05	12	20	61.4652	-0.0373483	61.5323	-0.0165855				61.6638	0.0031605				61.64	0.0224837				61.467	0.0411149				61.1502	0.0587942				60.6968	0.0752751				60.1163	0.09033				59.4194	0.103755
				20	0.05	12.05	20	61.4324	-0.0373187	61.4996	-0.0166171				61.6313	0.00307052				61.6082	0.0223364				61.4364	0.0409123				61.1211	0.0585392				60.6698	0.0749717				60.0915	0.0899833				59.3973	0.103372
				20	0.05	12.1	20	61.3997	-0.0372892	61.467	-0.0166486				61.599	0.00298077				61.5766	0.0221896				61.4059	0.0407103				61.0922	0.058285				60.6428	0.0746693				60.0668	0.0896378				59.3753	0.10299
				20	0.05	12.15	20	61.3671	-0.0372597	61.4345	-0.0166801				61.5667	0.00289126				61.545	0.0220431				61.3754	0.040509				61.0633	0.0580317				60.6158	0.074368				60.0422	0.0892938				59.3534	0.102609
				20	0.05	12.2	20	61.3345	-0.0372303	61.4021	-0.0167115				61.5345	0.00280199				61.5135	0.0218971				61.3451	0.0403083				61.0345	0.0577792				60.589	0.0740678				60.0177	0.0889511				59.3315	0.102231
				20	0.05	12.25	20	61.3021	-0.0372011	61.3698	-0.0167428				61.5025	0.00271296				61.4822	0.0217516				61.3148	0.0401082				61.0058	0.0575276				60.5622	0.0737687				59.9933	0.0886098				59.3097	0.101853
				20	0.05	12.3	20	61.2697	-0.0371719	61.3375	-0.0167741				61.4705	0.00262418				61.4509	0.0216064				61.2847	0.0399087				60.9772	0.0572768				60.5355	0.0734708				59.9689	0.0882698				59.2879	0.101478
				20	0.05	12.35	20	61.2375	-0.0371428	61.3054	-0.0168052				61.4386	0.00253564				61.4197	0.0214617				61.2546	0.0397099				60.9486	0.0570269				60.5089	0.0731739				59.9445	0.0879313				59.2662	0.101104
				20	0.05	12.4	20	61.2053	-0.0371137	61.2734	-0.0168363				61.4069	0.00244736				61.3886	0.0213175				61.2246	0.0395117				60.9202	0.0567779				60.4824	0.0728782				59.9203	0.087594				59.2446	0.100732
				20	0.05	12.45	20	61.1733	-0.0370848	61.2415	-0.0168673				61.3752	0.00235934				61.3576	0.0211736				61.1947	0.0393142				60.8918	0.0565298				60.4559	0.0725836				59.8961	0.0872582				59.223	0.100361
				20	0.05	12.5	20	61.1413	-0.037056	61.2096	-0.0168982				61.3436	0.00227158				61.3267	0.0210303				61.1649	0.0391174				60.8635	0.0562825				60.4295	0.0722901				59.872	0.0869237				59.2014	0.0999919
				20	0.05	12.55	20	61.1095	-0.0370272	61.1779	-0.0169291				61.3121	0.00218408				61.2958	0.0208873				61.1352	0.0389212				60.8353	0.0560362				60.4032	0.0719977				59.8479	0.0865905				59.1799	0.0996244
				20	0.05	12.6	20	61.0777	-0.0369985	61.1462	-0.0169598				61.2807	0.00209685				61.2651	0.0207449				61.1056	0.0387256				60.8072	0.0557907				60.377	0.0717064				59.824	0.0862587				59.1585	0.0992585
				20	0.05	12.65	20	61.046	-0.0369699	61.1147	-0.0169904				61.2494	0.00200989				61.2345	0.0206029				61.076	0.0385308				60.7791	0.0555461				60.3509	0.0714162				59.8	0.0859283				59.1371	0.0988941
				20	0.05	12.7	20	61.0144	-0.0369414	61.0832	-0.017021				61.2181	0.0019232				61.2039	0.0204613				61.0465	0.0383365				60.7512	0.0553024				60.3248	0.0711272				59.7762	0.0855993				59.1158	0.0985314
				20	0.05	12.75	20	60.9829	-0.036913	61.0518	-0.0170514				61.187	0.00183678				61.1734	0.0203202				61.0172	0.038143				60.7233	0.0550596				60.2988	0.0708393				59.7524	0.0852715				59.0946	0.0981703
				20	0.05	12.8	20	60.9515	-0.0368846	61.0206	-0.0170818				61.156	0.00175064				61.1431	0.0201796				60.9879	0.0379502				60.6955	0.0548176				60.2728	0.0705525				59.7287	0.0849452				59.0734	0.0978107
				20	0.05	12.85	20	60.9202	-0.0368564	60.9894	-0.0171121				61.125	0.00166478				61.1128	0.0200395				60.9587	0.037758				60.6678	0.0545766				60.247	0.0702669				59.705	0.0846202				59.0522	0.0974527
				20	0.05	12.9	20	60.889	-0.0368282	60.9583	-0.0171422				61.0942	0.0015792				61.0826	0.0198998				60.9296	0.0375665				60.6401	0.0543365				60.2212	0.0699824				59.6814	0.0842965				59.0311	0.0970963
				20	0.05	12.95	20	60.8579	-0.0368001	60.9273	-0.0171723				61.0634	0.00149391				61.0525	0.0197607				60.9005	0.0373757				60.6126	0.0540972				60.1955	0.0696989				59.6579	0.0839743				59.0101	0.0967415
				20	0.05	13	20	60.8269	-0.0367721	60.8964	-0.0172022				61.0327	0.0014089				61.0225	0.019622				60.8716	0.0371855				60.5851	0.0538589				60.1698	0.0694167				59.6344	0.0836533				58.9891	0.0963882
				20	0.05	13.05	20	60.7959	-0.0367442	60.8656	-0.0172321				61.0021	0.00132419				60.9925	0.0194837				60.8427	0.0369961				60.5577	0.0536215				60.1443	0.0691355				59.611	0.0833337				58.9682	0.0960365
				20	0.05	13.1	20	60.7651	-0.0367163	60.8348	-0.0172618				60.9717	0.00123976				60.9627	0.019346				60.814	0.0368073				60.5304	0.053385				60.1188	0.0688555				59.5877	0.0830155				58.9473	0.0956863
				20	0.05	13.15	20	60.7343	-0.0366886	60.8042	-0.0172915				60.9413	0.00115562				60.933	0.0192087				60.7853	0.0366193				60.5031	0.0531494				60.0933	0.0685766				59.5644	0.0826985				58.9265	0.0953377
				20	0.05	13.2	20	60.7036	-0.0366609	60.7737	-0.017321				60.9109	0.00107178				60.9033	0.019072				60.7566	0.0364319				60.476	0.0529146				60.068	0.0682988				59.5412	0.082383				58.9057	0.0949906
				20	0.05	13.25	20	60.6731	-0.0366333	60.7432	-0.0173504				60.8807	0.000988233				60.8737	0.0189357				60.7281	0.0362452				60.4489	0.0526808				60.0427	0.0680221				59.5181	0.0820688				58.8849	0.0946451
				20	0.05	13.3	20	60.6426	-0.0366058	60.7128	-0.0173797				60.8506	0.000904985				60.8442	0.0187999				60.6997	0.0360592				60.4219	0.052448				60.0175	0.0677466				59.495	0.0817559				58.8643	0.0943011
				20	0.05	13.35	20	60.6122	-0.0365783	60.6826	-0.0174089				60.8205	0.000822037				60.8148	0.0186647				60.6713	0.035874				60.3949	0.052216				59.9924	0.0674722				59.472	0.0814443				58.8436	0.0939587
				20	0.05	13.4	20	60.5819	-0.036551	60.6524	-0.017438				60.7906	0.000739389				60.7855	0.0185299				60.643	0.0356894				60.3681	0.0519849				59.9673	0.0671989				59.449	0.0811341				58.8231	0.0936178
				20	0.05	13.45	20	60.5517	-0.0365237	60.6223	-0.017467				60.7607	0.000657043				60.7563	0.0183956				60.6148	0.0355055				60.3413	0.0517547				59.9423	0.0669268				59.4261	0.0808252				58.8025	0.0932784
				20	0.05	13.5	20	60.5215	-0.0364965	60.5923	-0.0174959				60.7309	0.000575001				60.7271	0.0182618				60.5867	0.0353223				60.3146	0.0515255				59.9173	0.0666557				59.4032	0.0805176				58.7821	0.0929405
				20	0.05	13.55	20	60.4915	-0.0364694	60.5623	-0.0175246				60.7012	0.000493264				60.698	0.0181285				60.5587	0.0351399				60.288	0.0512972				59.8925	0.0663858				59.3805	0.0802114				58.7617	0.0926042
				20	0.05	13.6	20	60.4616	-0.0364424	60.5325	-0.0175533				60.6716	0.000411833				60.6691	0.0179958				60.5307	0.0349581				60.2614	0.0510697				59.8677	0.066117				59.3577	0.0799065				58.7413	0.0922693
				20	0.05	13.65	20	60.4317	-0.0364154	60.5028	-0.0175818				60.6421	0.000330709				60.6402	0.0178635				60.5029	0.0347771				60.2349	0.0508432				59.8429	0.0658493				59.3351	0.0796028				58.7209	0.091936
				20	0.05	13.7	20	60.4019	-0.0363885	60.4731	-0.0176102				60.6127	0.000249895				60.6114	0.0177317				60.4751	0.0345967				60.2085	0.0506176				59.8183	0.0655827				59.3125	0.0793006				58.7007	0.0916041
				20	0.05	13.75	20	60.3722	-0.0363617	60.4435	-0.0176385				60.5833	0.000169389				60.5826	0.0176004				60.4473	0.0344171				60.1822	0.0503929				59.7937	0.0653173				59.2899	0.0789996				58.6804	0.0912738
				20	0.05	13.8	20	60.3426	-0.036335	60.414	-0.0176667				60.5541	8.91945e-05				60.554	0.0174697				60.4197	0.0342381				60.1559	0.0501692				59.7692	0.065053				59.2674	0.0786999				58.6603	0.090945
				20	0.05	13.85	20	60.3131	-0.0363084	60.3846	-0.0176947				60.5249	9.31137e-06				60.5254	0.0173394				60.3921	0.0340599				60.1298	0.0499463				59.7447	0.0647897				59.245	0.0784016				58.6401	0.0906176
				20	0.05	13.9	20	60.2837	-0.0362818	60.3553	-0.0177226				60.4958	-7.02593e-05				60.4969	0.0172097				60.3647	0.0338824				60.1037	0.0497243				59.7203	0.0645276				59.2226	0.0781045				58.62	0.0902917
				20	0.05	13.95	20	60.2544	-0.0362553	60.3261	-0.0177504				60.4668	-0.000149517				60.4685	0.0170805				60.3373	0.0337056				60.0776	0.0495033				59.696	0.0642666				59.2003	0.0778088				58.6	0.0899674
				20	0.05	14	20	60.2251	-0.0362289	60.297	-0.0177781				60.4379	-0.00022846				60.4402	0.0169517				60.3099	0.0335295				60.0517	0.0492832				59.6717	0.0640068				59.178	0.0775143				58.58	0.0896444
				20	0.05	14.05	20	60.1959	-0.0362026	60.2679	-0.0178057				60.409	-0.000307089				60.412	0.0168235				60.2827	0.0333541				60.0258	0.049064				59.6475	0.063748				59.1558	0.0772212				58.5601	0.089323
				20	0.05	14.1	20	60.1669	-0.0361764	60.2389	-0.0178331				60.3803	-0.000385402				60.3838	0.0166958				60.2555	0.0331795				59.9999	0.0488456				59.6234	0.0634903				59.1337	0.0769293				58.5402	0.089003
				20	0.05	14.15	20	60.1379	-0.0361502	60.2101	-0.0178605				60.3516	-0.000463399				60.3558	0.0165687				60.2285	0.0330055				59.9742	0.0486282				59.5993	0.0632337				59.1116	0.0766388				58.5203	0.0886845
				20	0.05	14.2	20	60.109	-0.0361241	60.1813	-0.0178877				60.323	-0.000541079				60.3278	0.016442				60.2014	0.0328322				59.9485	0.0484118				59.5753	0.0629782				59.0895	0.0763495				58.5005	0.0883674
				20	0.05	14.25	20	60.0801	-0.0360981	60.1525	-0.0179147				60.2945	-0.000618442				60.2999	0.0163158				60.1745	0.0326597				59.9229	0.0481962				59.5513	0.0627239				59.0676	0.0760615				58.4808	0.0880518
				20	0.05	14.3	20	60.0514	-0.0360721	60.1239	-0.0179417				60.2661	-0.000695487				60.2721	0.0161902				60.1476	0.0324879				59.8974	0.0479815				59.5275	0.0624706				59.0456	0.0757747				58.461	0.0877376
				20	0.05	14.35	20	60.0227	-0.0360462	60.0953	-0.0179685				60.2377	-0.000772214				60.2443	0.016065				60.1209	0.0323168				59.8719	0.0477677				59.5036	0.0622184				59.0238	0.0754893				58.4414	0.0874249
				20	0.05	14.4	20	59.9941	-0.0360205	60.0669	-0.0179952				60.2095	-0.000848623				60.2166	0.0159404				60.0942	0.0321463				59.8465	0.0475548				59.4799	0.0619673				59.0019	0.0752051				58.4217	0.0871136
				20	0.05	14.45	20	59.9657	-0.0359947	60.0385	-0.0180218				60.1813	-0.000924713				60.189	0.0158163				60.0675	0.0319766				59.8212	0.0473429				59.4562	0.0617173				58.9802	0.0749222				58.4022	0.0868037
				20	0.05	14.5	20	59.9372	-0.0359691	60.0102	-0.0180482				60.1532	-0.00100048				60.1615	0.0156927				60.041	0.0318076				59.7959	0.0471318				59.4326	0.0614684				58.9585	0.0746406				58.3826	0.0864952
				20	0.05	14.55	20	59.9089	-0.0359435	59.982	-0.0180746				60.1252	-0.00107593				60.1341	0.0155697				60.0145	0.0316394				59.7708	0.0469216				59.409	0.0612206				58.9368	0.0743602				58.3631	0.0861882
				20	0.05	14.6	20	59.8807	-0.035918	59.9538	-0.0181008				60.0972	-0.00115107				60.1067	0.0154471				59.9881	0.0314718				59.7456	0.0467124				59.3855	0.0609739				58.9152	0.0740811				58.3437	0.0858826
				20	0.05	14.65	20	59.8525	-0.0358926	59.9258	-0.0181268				60.0694	-0.00122588				60.0795	0.0153251				59.9617	0.0313049				59.7206	0.046504				59.3621	0.0607282				58.8937	0.0738032				58.3243	0.0855784
				20	0.05	14.7	20	59.8244	-0.0358673	59.8978	-0.0181528				60.0416	-0.00130037				60.0523	0.0152035				59.9355	0.0311388				59.6956	0.0462965				59.3387	0.0604836				58.8722	0.0735266				58.3049	0.0852756
				20	0.05	14.75	20	59.7964	-0.035842	59.8699	-0.0181786				60.0139	-0.00137454				60.0251	0.0150825				59.9093	0.0309733				59.6707	0.04609				59.3154	0.0602401				58.8507	0.0732512				58.2856	0.0849742
				20	0.05	14.8	20	59.7685	-0.0358168	59.8421	-0.0182043				59.9863	-0.00144839				59.9981	0.014962				59.8832	0.0308086				59.6458	0.0458843				59.2921	0.0599977				58.8293	0.0729771				58.2663	0.0846742
				20	0.05	14.85	20	59.7407	-0.0357916	59.8143	-0.0182299				59.9588	-0.00152192				59.9711	0.014842				59.8571	0.0306445				59.6211	0.0456795				59.2689	0.0597564				58.808	0.0727042				58.2471	0.0843755
				20	0.05	14.9	20	59.7129	-0.0357666	59.7867	-0.0182553				59.9313	-0.00159513				59.9442	0.0147225				59.8311	0.0304812				59.5964	0.0454756				59.2458	0.0595161				58.7867	0.0724325				58.2279	0.0840783
				20	0.05	14.95	20	59.6852	-0.0357416	59.7591	-0.0182806				59.9039	-0.00166802				59.9174	0.0146036				59.8052	0.0303185				59.5717	0.0452726				59.2227	0.0592769				58.7655	0.0721621				58.2087	0.0837824
				20	0.05	15	20	59.6576	-0.0357167	59.7316	-0.0183058				59.8766	-0.00174059				59.8907	0.0144851				59.7794	0.0301566				59.5471	0.0450705				59.1997	0.0590387				58.7443	0.0718929				58.1896	0.083488
				20	0.05	15.05	20	59.6301	-0.0356919	59.7042	-0.0183308				59.8494	-0.00181284				59.864	0.0143672				59.7537	0.0299954				59.5226	0.0448692				59.1767	0.0588016				58.7232	0.0716249				58.1706	0.0831948
				20	0.05	15.1	20	59.6027	-0.0356671	59.6768	-0.0183558				59.8223	-0.00188477				59.8374	0.0142497				59.728	0.0298348				59.4982	0.0446689				59.1538	0.0585656				58.7021	0.0713582				58.1515	0.0829031
				20	0.05	15.15	20	59.5753	-0.0356424	59.6496	-0.0183805				59.7952	-0.00195638				59.8109	0.0141328				59.7024	0.029675				59.4738	0.0444694				59.1309	0.0583306				58.681	0.0710927				58.1325	0.0826127
				20	0.05	15.2	20	59.548	-0.0356178	59.6224	-0.0184052				59.7682	-0.00202767				59.7845	0.0140164				59.6768	0.0295158				59.4495	0.0442708				59.1082	0.0580967				58.6601	0.0708283				58.1136	0.0823236
				20	0.05	15.25	20	59.5208	-0.0355932	59.5953	-0.0184298				59.7413	-0.00209864				59.7581	0.0139005				59.6513	0.0293574				59.4252	0.0440731				59.0854	0.0578638				58.6391	0.0705652				58.0947	0.0820359
				20	0.05	15.3	20	59.4937	-0.0355687	59.5682	-0.0184542				59.7145	-0.00216929				59.7318	0.0137851				59.6259	0.0291997				59.401	0.0438762				59.0628	0.057632				58.6182	0.0703033				58.0758	0.0817496
				20	0.05	15.35	20	59.4666	-0.0355443	59.5413	-0.0184784				59.6877	-0.00223962				59.7056	0.0136702				59.6006	0.0290426				59.3769	0.0436803				59.0402	0.0574012				58.5974	0.0700426				58.057	0.0814645
				20	0.05	15.4	20	59.4396	-0.03552	59.5144	-0.0185026				59.661	-0.00230964				59.6794	0.0135558				59.5753	0.0288862				59.3528	0.0434852				59.0176	0.0571715				58.5766	0.0697831				58.0382	0.0811809
				20	0.05	15.45	20	59.4127	-0.0354957	59.4876	-0.0185266				59.6344	-0.00237933				59.6534	0.013442				59.5501	0.0287306				59.3288	0.0432909				58.9951	0.0569428				58.5559	0.0695248				58.0195	0.0808985
				20	0.05	15.5	20	59.3859	-0.0354715	59.4609	-0.0185505				59.6079	-0.00244871				59.6274	0.0133286				59.525	0.0285756				59.3049	0.0430976				58.9727	0.0567151				58.5352	0.0692676				58.0008	0.0806174
				20	0.05	15.55	20	59.3592	-0.0354473	59.4342	-0.0185743				59.5814	-0.00251777				59.6014	0.0132157				59.5	0.0284213				59.281	0.0429051				58.9503	0.0564884				58.5146	0.0690117				57.9821	0.0803377
				20	0.05	15.6	20	59.3325	-0.0354233	59.4077	-0.0185979				59.555	-0.00258651				59.5756	0.0131034				59.475	0.0282677				59.2572	0.0427135				58.9279	0.0562628				58.494	0.0687569				57.9635	0.0800593
				20	0.05	15.65	20	59.3059	-0.0353993	59.3812	-0.0186214				59.5287	-0.00265493				59.5498	0.0129915				59.45	0.0281148				59.2335	0.0425227				58.9057	0.0560382				58.4734	0.0685033				57.9449	0.0797822
				20	0.05	15.7	20	59.2794	-0.0353753	59.3547	-0.0186448				59.5025	-0.00272304				59.5241	0.0128802				59.4252	0.0279625				59.2098	0.0423328				58.8834	0.0558147				58.4529	0.0682509				57.9263	0.0795064
				20	0.05	15.75	20	59.2529	-0.0353515	59.3284	-0.0186681				59.4763	-0.00279083				59.4984	0.0127693				59.4004	0.027811				59.1862	0.0421437				58.8613	0.0555921				58.4325	0.0679996				57.9078	0.0792319
				20	0.05	15.8	20	59.2266	-0.0353277	59.3021	-0.0186912				59.4502	-0.00285831				59.4728	0.012659				59.3757	0.0276601				59.1626	0.0419555				58.8392	0.0553706				58.4121	0.0677495				57.8894	0.0789586
				20	0.05	15.85	20	59.2003	-0.0353039	59.2759	-0.0187142				59.4242	-0.00292547				59.4473	0.0125491				59.351	0.0275099				59.1391	0.0417682				58.8171	0.0551501				58.3917	0.0675006				57.8709	0.0786867
				20	0.05	15.9	20	59.1741	-0.0352803	59.2498	-0.0187371				59.3982	-0.00299232				59.4219	0.0124398				59.3264	0.0273604				59.1157	0.0415817				58.7951	0.0549306				58.3714	0.0672528				57.8525	0.078416
				20	0.05	15.95	20	59.1479	-0.0352567	59.2237	-0.0187598				59.3723	-0.00305885				59.3965	0.0123309				59.3019	0.0272116				59.0923	0.041396				58.7732	0.0547121				58.3512	0.0670061				57.8342	0.0781466
				20	0.05	16	20	59.1218	-0.0352331	59.1978	-0.0187824				59.3465	-0.00312507				59.3713	0.0122226				59.2774	0.0270634				59.069	0.0412112				58.7513	0.0544946				58.3309	0.0667606				57.8158	0.0778785
				20	0.05	16.05	20	59.0958	-0.0352097	59.1718	-0.0188049				59.3208	-0.00319097				59.346	0.0121147				59.253	0.0269159				59.0457	0.0410272				58.7294	0.0542781				58.3108	0.0665163				57.7975	0.0776117
				20	0.05	16.1	20	59.0699	-0.0351863	59.146	-0.0188272				59.2951	-0.00325657				59.3209	0.0120074				59.2287	0.0267691				59.0225	0.0408441				58.7077	0.0540626				58.2906	0.0662731				57.7793	0.0773461
				20	0.05	16.15	20	59.0441	-0.0351629	59.1202	-0.0188495				59.2696	-0.00332185				59.2958	0.0119005				59.2045	0.026623				58.9994	0.0406618				58.6859	0.0538481				58.2706	0.066031				57.7611	0.0770817
				20	0.05	16.2	20	59.0183	-0.0351397	59.0945	-0.0188716				59.244	-0.00338682				59.2708	0.0117941				59.1803	0.0264775				58.9763	0.0404804				58.6642	0.0536345				58.2505	0.06579				57.7429	0.0768186
				20	0.05	16.25	20	58.9926	-0.0351164	59.0689	-0.0188935				59.2186	-0.00345148				59.2458	0.0116882				59.1561	0.0263327				58.9533	0.0402998				58.6426	0.053422				58.2306	0.0655502				57.7248	0.0765567
				20	0.05	16.3	20	58.9669	-0.0350933	59.0434	-0.0189154				59.1932	-0.00351583				59.2209	0.0115828				59.132	0.0261885				58.9304	0.04012				58.621	0.0532105				58.2106	0.0653115				57.7067	0.0762961
				20	0.05	16.35	20	58.9414	-0.0350702	59.0179	-0.0189371				59.1679	-0.00357987				59.1961	0.0114779				59.108	0.026045				58.9074	0.039941				58.5995	0.0529999				58.1907	0.0650739				57.6886	0.0760367
				20	0.05	16.4	20	58.9159	-0.0350472	58.9925	-0.0189587				59.1427	-0.0036436				59.1714	0.0113735				59.0841	0.0259022				58.8846	0.0397628				58.5781	0.0527903				58.1709	0.0648374				57.6706	0.0757786
				20	0.05	16.45	20	58.8904	-0.0350243	58.9671	-0.0189802				59.1175	-0.00370702				59.1467	0.0112696				59.0602	0.02576				58.8618	0.0395855				58.5566	0.0525817				58.151	0.0646021				57.6526	0.0755216
				20	0.05	16.5	20	58.8651	-0.0350014	58.9419	-0.0190015				59.0924	-0.00377014				59.1221	0.0111661				59.0364	0.0256185				58.8391	0.039409				58.5353	0.052374				58.1313	0.0643678				57.6346	0.0752659
				20	0.05	16.55	20	58.8398	-0.0349786	58.9167	-0.0190227				59.0674	-0.00383294				59.0975	0.0110631				59.0126	0.0254776				58.8164	0.0392333				58.5139	0.0521673				58.1116	0.0641346				57.6167	0.0750114
				20	0.05	16.6	20	58.8146	-0.0349558	58.8915	-0.0190438				59.0424	-0.00389545				59.073	0.0109606				58.9889	0.0253374				58.7938	0.0390585				58.4927	0.0519616				58.0919	0.0639025				57.5988	0.0747581
				20	0.05	16.65	20	58.7894	-0.0349331	58.8665	-0.0190648				59.0175	-0.00395765				59.0486	0.0108586				58.9653	0.0251979				58.7713	0.0388844				58.4715	0.0517568				58.0722	0.0636715				57.5809	0.074506
				20	0.05	16.7	20	58.7643	-0.0349105	58.8415	-0.0190856				58.9927	-0.00401954				59.0243	0.0107571				58.9417	0.025059				58.7488	0.0387111				58.4503	0.051553				58.0526	0.0634416				57.5631	0.0742551
				20	0.05	16.75	20	58.7393	-0.0348879	58.8166	-0.0191063				58.9679	-0.00408113				59	0.0106561				58.9182	0.0249207				58.7263	0.0385387				58.4292	0.0513501				58.0331	0.0632128				57.5453	0.0740053
				20	0.05	16.8	20	58.7144	-0.0348654	58.7917	-0.0191269				58.9432	-0.00414242				58.9758	0.0105555				58.8948	0.0247831				58.7039	0.0383671				58.4081	0.0511482				58.0136	0.0629851				57.5276	0.0737568
				20	0.05	16.85	20	58.6895	-0.034843	58.7669	-0.0191474				58.9186	-0.00420341				58.9516	0.0104554				58.8714	0.0246461				58.6816	0.0381962				58.3871	0.0509473				57.9941	0.0627584				57.5099	0.0735094
				20	0.05	16.9	20	58.6647	-0.0348206	58.7422	-0.0191677				58.894	-0.00426409				58.9275	0.0103558				58.8481	0.0245098				58.6593	0.0380262				58.3661	0.0507472				57.9747	0.0625328				57.4922	0.0732633
				20	0.05	16.95	20	58.64	-0.0347982	58.7175	-0.0191879				58.8695	-0.00432447				58.9035	0.0102566				58.8248	0.0243741				58.6371	0.0378569				58.3452	0.0505481				57.9553	0.0623083				57.4745	0.0730183
				20	0.05	17	20	58.6153	-0.034776	58.6929	-0.019208				58.8451	-0.00438456				58.8795	0.010158				58.8016	0.024239				58.6149	0.0376884				58.3244	0.05035				57.936	0.0620848				57.4569	0.0727744
				20	0.05	17.05	20	58.5907	-0.0347538	58.6684	-0.019228				58.8207	-0.00444435				58.8556	0.0100598				58.7784	0.0241046				58.5928	0.0375208				58.3035	0.0501528				57.9167	0.0618623				57.4393	0.0725317
				20	0.05	17.1	20	58.5662	-0.0347316	58.644	-0.0192478				58.7964	-0.00450383				58.8318	0.00996202				58.7554	0.0239708				58.5708	0.0373539				58.2828	0.0499565				57.8974	0.061641				57.4218	0.0722902
				20	0.05	17.15	20	58.5417	-0.0347096	58.6196	-0.0192675				58.7722	-0.00456303				58.808	0.00986475				58.7323	0.0238376				58.5488	0.0371878				58.2621	0.0497611				57.8782	0.0614206				57.4043	0.0720498
				20	0.05	17.2	20	58.5173	-0.0346875	58.5953	-0.0192871				58.748	-0.00462192				58.7843	0.00976794				58.7094	0.0237051				58.5268	0.0370225				58.2414	0.0495666				57.859	0.0612014				57.3868	0.0718105
				20	0.05	17.25	20	58.493	-0.0346656	58.571	-0.0193066				58.7239	-0.00468052				58.7606	0.0096716				58.6865	0.0235732				58.5049	0.0368579				58.2208	0.0493731				57.8399	0.0609831				57.3693	0.0715724
				20	0.05	17.3	20	58.4687	-0.0346437	58.5468	-0.019326				58.6999	-0.00473883				58.737	0.00957572				58.6636	0.0234419				58.4831	0.0366941				58.2002	0.0491804				57.8208	0.0607659				57.3519	0.0713355
				20	0.05	17.35	20	58.4445	-0.0346218	58.5227	-0.0193452				58.6759	-0.00479684				58.7135	0.00948031				58.6408	0.0233113				58.4613	0.0365311				58.1796	0.0489887				57.8017	0.0605497				57.3345	0.0710996
				20	0.05	17.4	20	58.4204	-0.0346	58.4986	-0.0193643				58.652	-0.00485456				58.69	0.00938535				58.6181	0.0231812				58.4396	0.0363689				58.1592	0.0487979				57.7827	0.0603345				57.3172	0.0708649
				20	0.05	17.45	20	58.3963	-0.0345783	58.4746	-0.0193833				58.6281	-0.00491198				58.6666	0.00929085				58.5954	0.0230518				58.4179	0.0362074				58.1387	0.048608				57.7638	0.0601204				57.2998	0.0706313
				20	0.05	17.5	20	58.3723	-0.0345566	58.4507	-0.0194022				58.6043	-0.00496912				58.6433	0.00919681				58.5728	0.022923				58.3962	0.0360467				58.1183	0.048419				57.7448	0.0599073				57.2825	0.0703988
				20	0.05	17.55	20	58.3483	-0.034535	58.4268	-0.0194209				58.5806	-0.00502597				58.62	0.00910322				58.5502	0.0227948				58.3747	0.0358868				58.098	0.0482309				57.7259	0.0596951				57.2653	0.0701674
				20	0.05	17.6	20	58.3244	-0.0345135	58.403	-0.0194395				58.557	-0.00508252				58.5968	0.00901008				58.5277	0.0226672				58.3531	0.0357276				58.0777	0.0480436				57.7071	0.059484				57.2481	0.0699372
				20	0.05	17.65	20	58.3006	-0.034492	58.3793	-0.019458				58.5334	-0.00513879				58.5736	0.0089174				58.5052	0.0225402				58.3317	0.0355692				58.0574	0.0478573				57.6883	0.0592739				57.2309	0.069708
				20	0.05	17.7	20	58.2769	-0.0344706	58.3556	-0.0194764				58.5098	-0.00519478				58.5505	0.00882517				58.4829	0.0224138				58.3102	0.0354115				58.0372	0.0476718				57.6695	0.0590648				57.2137	0.0694799
				20	0.05	17.75	20	58.2532	-0.0344492	58.332	-0.0194947				58.4863	-0.00525047				58.5274	0.00873338				58.4605	0.0222881				58.2889	0.0352546				58.0171	0.0474872				57.6507	0.0588567				57.1966	0.0692529
				20	0.05	17.8	20	58.2295	-0.0344279	58.3084	-0.0195129				58.4629	-0.00530589				58.5044	0.00864205				58.4382	0.0221629				58.2676	0.0350984				57.997	0.0473035				57.6321	0.0586496				57.1795	0.069027
				20	0.05	17.85	20	58.206	-0.0344066	58.2849	-0.0195309				58.4396	-0.00536101				58.4815	0.00855116				58.416	0.0220383				58.2463	0.034943				57.9769	0.0471207				57.6134	0.0584434				57.1624	0.0688022
				20	0.05	17.9	20	58.1825	-0.0343854	58.2615	-0.0195488				58.4163	-0.00541586				58.4587	0.00846071				58.3938	0.0219144				58.2251	0.0347883				57.9569	0.0469388				57.5948	0.0582383				57.1453	0.0685784
				20	0.05	17.95	20	58.159	-0.0343642	58.2381	-0.0195666				58.3931	-0.00547042				58.4358	0.00837071				58.3717	0.021791				58.2039	0.0346343				57.9369	0.0467577				57.5762	0.0580341				57.1283	0.0683557
				20	0.05	18	20	58.1356	-0.0343431	58.2148	-0.0195843				58.3699	-0.0055247				58.4131	0.00828114				58.3496	0.0216682				58.1828	0.0344811				57.9169	0.0465774				57.5576	0.0578309				57.1114	0.0681341
				20	0.05	18.05	20	58.1123	-0.0343221	58.1915	-0.0196018				58.3468	-0.0055787				58.3904	0.00819202				58.3276	0.021546				58.1617	0.0343286				57.8971	0.0463981				57.5391	0.0576287				57.0944	0.0679135
				20	0.05	18.1	20	58.0891	-0.0343011	58.1683	-0.0196193				58.3237	-0.00563242				58.3678	0.00810333				58.3057	0.0214244				58.1407	0.0341768				57.8772	0.0462195				57.5207	0.0574274				57.0775	0.067694
				20	0.05	18.15	20	58.0659	-0.0342802	58.1452	-0.0196366				58.3007	-0.00568586				58.3452	0.00801508				58.2838	0.0213034				58.1197	0.0340258				57.8574	0.0460419				57.5022	0.0572271				57.0606	0.0674755
				20	0.05	18.2	20	58.0427	-0.0342593	58.1222	-0.0196538				58.2778	-0.00573902				58.3227	0.00792727				58.2619	0.021183				58.0988	0.0338755				57.8376	0.045865				57.4838	0.0570277				57.0437	0.0672581
				20	0.05	18.25	20	58.0196	-0.0342385	58.0991	-0.0196709				58.2549	-0.00579191				58.3002	0.00783988				58.2401	0.0210631				58.078	0.0337259				57.8179	0.0456891				57.4655	0.0568293				57.0269	0.0670417
				20	0.05	18.3	20	57.9966	-0.0342177	58.0762	-0.0196879				58.2321	-0.00584452				58.2778	0.00775293				58.2184	0.0209438				58.0571	0.033577				57.7983	0.0455139				57.4471	0.0566319				57.0101	0.0668264
				20	0.05	18.35	20	57.9737	-0.034197	58.0533	-0.0197048				58.2094	-0.00589686				58.2554	0.00766641				58.1967	0.0208251				58.0364	0.0334288				57.7786	0.0453396				57.4289	0.0564353				56.9933	0.0666121
				20	0.05	18.4	20	57.9508	-0.0341763	58.0305	-0.0197215				58.1867	-0.00594892				58.2331	0.00758032				58.1751	0.020707				58.0156	0.0332814				57.759	0.0451662				57.4106	0.0562398				56.9766	0.0663988
				20	0.05	18.45	20	57.9279	-0.0341557	58.0077	-0.0197382				58.164	-0.00600072				58.2109	0.00749465				58.1535	0.0205895				57.995	0.0331346				57.7395	0.0449935				57.3924	0.0560451				56.9599	0.0661865
				20	0.05	18.5	20	57.9052	-0.0341351	57.985	-0.0197547				58.1414	-0.00605224				58.1887	0.00740941				58.132	0.0204725				57.9743	0.0329886				57.72	0.0448217				57.3742	0.0558514				56.9432	0.0659752
				20	0.05	18.55	20	57.8824	-0.0341146	57.9623	-0.0197711				58.1189	-0.00610349				58.1666	0.00732459				58.1105	0.0203561				57.9538	0.0328432				57.7005	0.0446507				57.3561	0.0556586				56.9265	0.065765
				20	0.05	18.6	20	57.8598	-0.0340942	57.9397	-0.0197874				58.0964	-0.00615447				58.1445	0.00724019				58.0891	0.0202402				57.9332	0.0326986				57.6811	0.0444806				57.338	0.0554668				56.9099	0.0655557
				20	0.05	18.65	20	57.8372	-0.0340738	57.9172	-0.0198036				58.074	-0.00620518				58.1225	0.00715621				58.0677	0.020125				57.9127	0.0325546				57.6617	0.0443112				57.3199	0.0552758				56.8933	0.0653475
				20	0.05	18.7	20	57.8146	-0.0340535	57.8947	-0.0198197				58.0517	-0.00625562				58.1005	0.00707265				58.0464	0.0200102				57.8923	0.0324114				57.6424	0.0441427				57.3019	0.0550858				56.8767	0.0651402
				20	0.05	18.75	20	57.7921	-0.0340332	57.8723	-0.0198356				58.0294	-0.0063058				58.0786	0.0069895				58.0251	0.0198961				57.8719	0.0322688				57.6231	0.0439749				57.2839	0.0548967				56.8602	0.064934
				20	0.05	18.8	20	57.7697	-0.0340129	57.8499	-0.0198515				58.0071	-0.00635572				58.0567	0.00690677				58.0039	0.0197825				57.8516	0.032127				57.6039	0.043808				57.2659	0.0547084				56.8437	0.0647287
				20	0.05	18.85	20	57.7473	-0.0339927	57.8276	-0.0198672				57.9849	-0.00640536				58.0349	0.00682446				57.9827	0.0196694				57.8313	0.0319858				57.5847	0.0436419				57.248	0.0545211				56.8272	0.0645244
				20	0.05	18.9	20	57.725	-0.0339726	57.8054	-0.0198829				57.9628	-0.00645475				58.0132	0.00674255				57.9616	0.0195569				57.811	0.0318453				57.5655	0.0434765				57.2301	0.0543347				56.8107	0.0643211
				20	0.05	18.95	20	57.7028	-0.0339525	57.7832	-0.0198984				57.9407	-0.00650387				57.9915	0.00666106				57.9405	0.019445				57.7908	0.0317054				57.5464	0.043312				57.2122	0.0541492				56.7943	0.0641187
				20	0.05	19	20	57.6806	-0.0339325	57.761	-0.0199138				57.9187	-0.00655273				57.9698	0.00657997				57.9195	0.0193336				57.7706	0.0315663				57.5273	0.0431483				57.1944	0.0539645				56.7779	0.0639174
				20	0.05	19.05	20	57.6584	-0.0339125	57.7389	-0.0199291				57.8968	-0.00660134				57.9483	0.00649929				57.8985	0.0192227				57.7505	0.0314278				57.5082	0.0429853				57.1766	0.0537808				56.7615	0.0637169
				20	0.05	19.1	20	57.6363	-0.0338926	57.7169	-0.0199443				57.8748	-0.00664968				57.9267	0.00641902				57.8776	0.0191124				57.7305	0.03129				57.4892	0.0428231				57.1588	0.0535979				56.7452	0.0635175
				20	0.05	19.15	20	57.6143	-0.0338727	57.6949	-0.0199594				57.853	-0.00669776				57.9052	0.00633914				57.8568	0.0190026				57.7104	0.0311528				57.4702	0.0426617				57.1411	0.0534159				56.7289	0.063319
				20	0.05	19.2	20	57.5923	-0.0338529	57.673	-0.0199744				57.8312	-0.00674559				57.8838	0.00625967				57.8359	0.0188934				57.6905	0.0310164				57.4513	0.0425011				57.1234	0.0532348				56.7126	0.0631214
				20	0.05	19.25	20	57.5704	-0.0338331	57.6512	-0.0199893				57.8094	-0.00679316				57.8624	0.0061806				57.8152	0.0187847				57.6705	0.0308805				57.4324	0.0423413				57.1058	0.0530545				56.6963	0.0629248
				20	0.05	19.3	20	57.5485	-0.0338133	57.6293	-0.020004				57.7877	-0.00684048				57.8411	0.00610193				57.7944	0.0186765				57.6506	0.0307454				57.4136	0.0421822				57.0881	0.0528751				56.6801	0.0627292
				20	0.05	19.35	20	57.5267	-0.0337937	57.6076	-0.0200187				57.7661	-0.00688754				57.8198	0.00602366				57.7738	0.0185689				57.6308	0.0306109				57.3948	0.0420239				57.0706	0.0526966				56.6638	0.0625344
				20	0.05	19.4	20	57.5049	-0.033774	57.5859	-0.0200332				57.7445	-0.00693435				57.7986	0.00594578				57.7531	0.0184618				57.611	0.030477				57.376	0.0418663				57.053	0.0525189				56.6477	0.0623406
				20	0.05	19.45	20	57.4832	-0.0337544	57.5642	-0.0200477				57.723	-0.0069809				57.7774	0.00586829				57.7326	0.0183552				57.5912	0.0303438				57.3573	0.0417095				57.0355	0.0523421				56.6315	0.0621478
				20	0.05	19.5	20	57.4616	-0.0337349	57.5426	-0.020062				57.7015	-0.00702721				57.7563	0.00579119				57.712	0.0182492				57.5715	0.0302113				57.3386	0.0415535				57.018	0.0521661				56.6154	0.0619558
				20	0.05	19.55	20	57.44	-0.0337154	57.5211	-0.0200763				57.6801	-0.00707327				57.7352	0.00571449				57.6915	0.0181436				57.5518	0.0300793				57.3199	0.0413982				57.0005	0.051991				56.5993	0.0617648
				20	0.05	19.6	20	57.4184	-0.033696	57.4996	-0.0200904				57.6587	-0.00711907				57.7142	0.00563817				57.6711	0.0180386				57.5322	0.0299481				57.3013	0.0412437				56.9831	0.0518167				56.5832	0.0615746
				20	0.05	19.65	20	57.3969	-0.0336766	57.4782	-0.0201044				57.6374	-0.00716463				57.6932	0.00556224				57.6507	0.0179341				57.5126	0.0298174				57.2827	0.0410899				56.9657	0.0516432				56.5671	0.0613854
				20	0.05	19.7	20	57.3755	-0.0336572	57.4568	-0.0201184				57.6161	-0.00720995				57.6723	0.00548669				57.6304	0.0178302				57.4931	0.0296874				57.2642	0.0409369				56.9483	0.0514706				56.5511	0.0611971
				20	0.05	19.75	20	57.3541	-0.0336379	57.4355	-0.0201322				57.5949	-0.00725501				57.6514	0.00541153				57.6101	0.0177267				57.4736	0.0295581				57.2457	0.0407846				56.931	0.0512988				56.5351	0.0610097
				20	0.05	19.8	20	57.3328	-0.0336187	57.4142	-0.0201459				57.5737	-0.00729984				57.6306	0.00533675				57.5898	0.0176237				57.4541	0.0294293				57.2272	0.040633				56.9137	0.0511278				56.5191	0.0608232
				20	0.05	19.85	20	57.3115	-0.0335995	57.393	-0.0201595				57.5526	-0.00734442				57.6098	0.00526235				57.5696	0.0175213				57.4347	0.0293012				57.2088	0.0404821				56.8965	0.0509577				56.5031	0.0606376
				20	0.05	19.9	20	57.2903	-0.0335803	57.3718	-0.020173				57.5315	-0.00738875				57.5891	0.00518833				57.5495	0.0174194				57.4153	0.0291738				57.1904	0.040332				56.8792	0.0507884				56.4872	0.0604528
				20	0.05	19.95	20	57.2691	-0.0335612	57.3507	-0.0201864				57.5105	-0.00743285				57.5684	0.00511468				57.5293	0.0173179				57.396	0.0290469				57.1721	0.0401826				56.862	0.0506198				56.4713	0.060269
				20	0.05	20	20	57.248	-0.0335422	57.3296	-0.0201998				57.4895	-0.0074767				57.5478	0.00504141				57.5093	0.017217				57.3767	0.0289206				57.1537	0.040034				56.8449	0.0504521				56.4554	0.060086
				20	0.05	20.05	20	57.2269	-0.0335232	57.3086	-0.020213				57.4686	-0.00752032				57.5272	0.00496851				57.4893	0.0171166				57.3575	0.028795				57.1355	0.039886				56.8277	0.0502852				56.4396	0.0599039
				20	0.05	20.1	20	57.2059	-0.0335042	57.2876	-0.0202261				57.4477	-0.00756369				57.5066	0.00489599				57.4693	0.0170166				57.3383	0.02867				57.1172	0.0397388				56.8106	0.0501191				56.4238	0.0597226
				20	0.05	20.15	20	57.1849	-0.0334853	57.2667	-0.0202391				57.4269	-0.00760683				57.4862	0.00482383				57.4494	0.0169172				57.3191	0.0285456				57.099	0.0395923				56.7935	0.0499538				56.408	0.0595423
				20	0.05	20.2	20	57.164	-0.0334664	57.2458	-0.020252				57.4061	-0.00764973				57.4657	0.00475205				57.4295	0.0168182				57.3	0.0284218				57.0808	0.0394465				56.7765	0.0497893				56.3922	0.0593628
				20	0.05	20.25	20	57.1431	-0.0334476	57.225	-0.0202648				57.3854	-0.0076924				57.4453	0.00468063				57.4096	0.0167198				57.2809	0.0282986				57.0627	0.0393013				56.7595	0.0496255				56.3764	0.0591841
				20	0.05	20.3	20	57.1223	-0.0334288	57.2042	-0.0202775				57.3648	-0.00773483				57.425	0.00460957				57.3898	0.0166218				57.2619	0.028176				57.0446	0.0391569				56.7425	0.0494626				56.3607	0.0590063
				20	0.05	20.35	20	57.1015	-0.03341	57.1835	-0.0202901				57.3441	-0.00777703				57.4047	0.00453888				57.3701	0.0165243				57.2429	0.028054				57.0265	0.0390132				56.7255	0.0493004				56.345	0.0588293
				20	0.05	20.4	20	57.0808	-0.0333913	57.1628	-0.0203027				57.3236	-0.007819				57.3844	0.00446855				57.3504	0.0164273				57.2239	0.0279326				57.0085	0.0388702				56.7086	0.0491391				56.3293	0.0586532
				20	0.05	20.45	20	57.0601	-0.0333727	57.1422	-0.0203151				57.303	-0.00786074				57.3642	0.00439858				57.3307	0.0163308				57.205	0.0278118				56.9905	0.0387279				56.6917	0.0489784				56.3137	0.0584779
				20	0.05	20.5	20	57.0395	-0.0333541	57.1216	-0.0203274				57.2826	-0.00790224				57.3441	0.00432897				57.3111	0.0162348				57.1861	0.0276916				56.9726	0.0385863				56.6749	0.0488186				56.298	0.0583035
				20	0.05	20.55	20	57.0189	-0.0333355	57.1011	-0.0203396				57.2621	-0.00794352				57.324	0.00425972				57.2915	0.0161392				57.1673	0.0275719				56.9547	0.0384453				56.658	0.0486595				56.2824	0.0581299
				20	0.05	20.6	20	56.9984	-0.033317	57.0806	-0.0203518				57.2417	-0.00798457				57.3039	0.00419082				57.272	0.0160441				57.1485	0.0274529				56.9368	0.038305				56.6412	0.0485012				56.2668	0.0579571
				20	0.05	20.65	20	56.9779	-0.0332985	57.0602	-0.0203638				57.2214	-0.00802539				57.2839	0.00412228				57.2525	0.0159495				57.1297	0.0273344				56.9189	0.0381654				56.6244	0.0483437				56.2513	0.0577852
				20	0.05	20.7	20	56.9575	-0.0332801	57.0398	-0.0203758				57.2011	-0.00806599				57.2639	0.00405409				57.233	0.0158554				57.111	0.0272166				56.9011	0.0380265				56.6077	0.0481869				56.2357	0.057614
				20	0.05	20.75	20	56.9371	-0.0332617	57.0195	-0.0203876				57.1809	-0.00810636				57.244	0.00398625				57.2136	0.0157617				57.0923	0.0270993				56.8833	0.0378883				56.591	0.0480308				56.2202	0.0574437
				20	0.05	20.8	20	56.9167	-0.0332434	56.9992	-0.0203994				57.1607	-0.0081465				57.2241	0.00391876				57.1943	0.0156685				57.0736	0.0269825				56.8656	0.0377507				56.5743	0.0478755				56.2047	0.0572742
				20	0.05	20.85	20	56.8965	-0.0332251	56.9789	-0.020411				57.1405	-0.00818643				57.2042	0.00385162				57.1749	0.0155758				57.055	0.0268664				56.8479	0.0376138				56.5576	0.047721				56.1893	0.0571055
				20	0.05	20.9	20	56.8762	-0.0332068	56.9588	-0.0204226				57.1204	-0.00822613				57.1844	0.00378482				57.1557	0.0154835				57.0365	0.0267508				56.8302	0.0374775				56.541	0.0475672				56.1738	0.0569376
				20	0.05	20.95	20	56.856	-0.0331886	56.9386	-0.0204341				57.1004	-0.00826561				57.1647	0.00371837				57.1364	0.0153917				57.0179	0.0266357				56.8125	0.0373419				56.5244	0.0474141				56.1584	0.0567704
				20	0.05	21	20	56.8359	-0.0331704	56.9185	-0.0204454				57.0804	-0.00830487				57.145	0.00365225				57.1172	0.0153003				56.9994	0.0265213				56.7949	0.037207				56.5078	0.0472618				56.143	0.0566041
				20	0.05	21.05	20	56.8158	-0.0331523	56.8985	-0.0204567				57.0604	-0.00834391				57.1253	0.00358649				57.0981	0.0152094				56.981	0.0264074				56.7774	0.0370727				56.4913	0.0471102				56.1276	0.0564386
				20	0.05	21.1	20	56.7957	-0.0331342	56.8785	-0.0204679				57.0405	-0.00838273				57.1057	0.00352106				57.0789	0.015119				56.9626	0.026294				56.7598	0.0369391				56.4748	0.0469593				56.1123	0.0562739
				20	0.05	21.15	20	56.7757	-0.0331162	56.8585	-0.020479				57.0206	-0.00842134				57.0861	0.00345596				57.0599	0.015029				56.9442	0.0261812				56.7423	0.0368061				56.4583	0.0468091				56.097	0.0561099
				20	0.05	21.2	20	56.7558	-0.0330982	56.8386	-0.0204901				57.0008	-0.00845973				57.0666	0.00339121				57.0408	0.0149394				56.9258	0.026069				56.7248	0.0366738				56.4418	0.0466597				56.0816	0.0559467
				20	0.05	21.25	20	56.7359	-0.0330802	56.8187	-0.020501				56.981	-0.00849791				57.0471	0.00332679				57.0218	0.0148503				56.9075	0.0259573				56.7074	0.0365421				56.4254	0.0465109				56.0664	0.0557843
				20	0.05	21.3	20	56.716	-0.0330623	56.7989	-0.0205118				56.9613	-0.00853587				57.0277	0.0032627				57.0029	0.0147617				56.8893	0.0258462				56.69	0.036411				56.409	0.0463629				56.0511	0.0556227
				20	0.05	21.35	20	56.6962	-0.0330444	56.7791	-0.0205226				56.9416	-0.00857362				57.0083	0.00319894				56.984	0.0146735				56.871	0.0257356				56.6726	0.0362806				56.3926	0.0462156				56.0359	0.0554618
				20	0.05	21.4	20	56.6764	-0.0330266	56.7594	-0.0205332				56.9219	-0.00861115				56.9889	0.00313552				56.9651	0.0145857				56.8528	0.0256255				56.6552	0.0361508				56.3763	0.046069				56.0207	0.0553017
				20	0.05	21.45	20	56.6567	-0.0330088	56.7397	-0.0205438				56.9023	-0.00864848				56.9696	0.00307242				56.9463	0.0144984				56.8347	0.025516				56.6379	0.0360216				56.36	0.0459231				56.0055	0.0551424
				20	0.05	21.5	20	56.637	-0.032991	56.7201	-0.0205543				56.8828	-0.00868559				56.9503	0.00300965				56.9275	0.0144115				56.8166	0.025407				56.6206	0.035893				56.3437	0.0457779				55.9903	0.0549838
				20	0.05	21.55	20	56.6173	-0.0329733	56.7005	-0.0205646				56.8633	-0.0087225				56.9311	0.00294721				56.9087	0.014325				56.7985	0.0252986				56.6034	0.0357651				56.3274	0.0456334				55.9751	0.0548259
				20	0.05	21.6	20	56.5978	-0.0329556	56.6809	-0.020575				56.8438	-0.0087592				56.9119	0.00288509				56.89	0.014239				56.7804	0.0251907				56.5862	0.0356378				56.3112	0.0454896				55.96	0.0546688
				20	0.05	21.65	20	56.5782	-0.032938	56.6614	-0.0205852				56.8243	-0.00879569				56.8927	0.00282329				56.8714	0.0141534				56.7624	0.0250833				56.569	0.0355111				56.295	0.0453465				55.9449	0.0545125
				20	0.05	21.7	20	56.5587	-0.0329204	56.6419	-0.0205953				56.805	-0.00883197				56.8736	0.00276181				56.8527	0.0140682				56.7444	0.0249764				56.5518	0.035385				56.2788	0.045204				55.9298	0.0543569
				20	0.05	21.75	20	56.5392	-0.0329028	56.6225	-0.0206053				56.7856	-0.00886805				56.8546	0.00270066				56.8341	0.0139835				56.7265	0.0248701				56.5347	0.0352596				56.2626	0.0450623				55.9148	0.054202
				20	0.05	21.8	20	56.5198	-0.0328853	56.6031	-0.0206153				56.7663	-0.00890393				56.8355	0.00263982				56.8156	0.0138992				56.7086	0.0247643				56.5176	0.0351347				56.2465	0.0449212				55.8997	0.0540479
				20	0.05	21.85	20	56.5004	-0.0328678	56.5838	-0.0206252				56.7471	-0.0089396				56.8166	0.00257929				56.7971	0.0138153				56.6907	0.024659				56.5006	0.0350104				56.2304	0.0447808				55.8847	0.0538945
				20	0.05	21.9	20	56.4811	-0.0328504	56.5645	-0.020635				56.7278	-0.00897507				56.7976	0.00251908				56.7786	0.0137318				56.6729	0.0245542				56.4835	0.0348868				56.2143	0.044641				55.8697	0.0537418
				20	0.05	21.95	20	56.4618	-0.032833	56.5452	-0.0206447				56.7087	-0.00901034				56.7787	0.00245919				56.7601	0.0136487				56.6551	0.02445				56.4665	0.0347637				56.1983	0.0445019				55.8547	0.0535898
				20	0.05	22	20	56.4426	-0.0328156	56.526	-0.0206543				56.6895	-0.00904541				56.7599	0.0023996				56.7417	0.0135661				56.6373	0.0243462				56.4496	0.0346412				56.1822	0.0443635				55.8398	0.0534385
				20	0.05	22.05	20	56.4234	-0.0327983	56.5069	-0.0206638				56.6704	-0.00908028				56.741	0.00234033				56.7234	0.0134839				56.6196	0.024243				56.4326	0.0345193				56.1663	0.0442258				55.8248	0.053288
				20	0.05	22.1	20	56.4042	-0.032781	56.4877	-0.0206733				56.6514	-0.00911495				56.7223	0.00228137				56.705	0.0134021				56.6019	0.0241402				56.4157	0.0343981				56.1503	0.0440887				55.8099	0.0531382
				20	0.05	22.15	20	56.3851	-0.0327638	56.4687	-0.0206826				56.6324	-0.00914943				56.7035	0.00222271				56.6867	0.0133207				56.5842	0.024038				56.3989	0.0342773				56.1343	0.0439522				55.795	0.0529891
				20	0.05	22.2	20	56.366	-0.0327466	56.4496	-0.0206919				56.6134	-0.0091837				56.6848	0.00216436				56.6685	0.0132397				56.5666	0.0239363				56.382	0.0341572				56.1184	0.0438164				55.7801	0.0528406
				20	0.05	22.25	20	56.347	-0.0327294	56.4306	-0.0207011				56.5945	-0.00921779				56.6661	0.00210631				56.6503	0.0131591				56.549	0.023835				56.3652	0.0340377				56.1025	0.0436813				55.7653	0.0526929
				20	0.05	22.3	20	56.328	-0.0327123	56.4117	-0.0207102				56.5756	-0.00925167				56.6475	0.00204856				56.6321	0.0130789				56.5314	0.0237343				56.3484	0.0339187				56.0867	0.0435468				55.7505	0.0525459
				20	0.05	22.35	20	56.309	-0.0326952	56.3928	-0.0207193				56.5568	-0.00928537				56.6289	0.00199112				56.614	0.0129991				56.5139	0.0236341				56.3317	0.0338003				56.0708	0.0434129				55.7356	0.0523996
				20	0.05	22.4	20	56.2901	-0.0326781	56.3739	-0.0207282				56.538	-0.00931887				56.6104	0.00193398				56.5959	0.0129197				56.4964	0.0235343				56.3149	0.0336825				56.055	0.0432797				55.7209	0.0522539
				20	0.05	22.45	20	56.2712	-0.0326611	56.3551	-0.0207371				56.5192	-0.00935218				56.5919	0.00187713				56.5778	0.0128407				56.479	0.0234351				56.2982	0.0335652				56.0392	0.0431471				55.7061	0.052109
				20	0.05	22.5	20	56.2524	-0.0326441	56.3363	-0.0207459				56.5005	-0.0093853				56.5734	0.00182059				56.5598	0.0127621				56.4615	0.0233363				56.2816	0.0334486				56.0234	0.0430152				55.6913	0.0519647
				20	0.05	22.55	20	56.2336	-0.0326272	56.3175	-0.0207546				56.4818	-0.00941822				56.555	0.00176433				56.5418	0.012684				56.4441	0.023238				56.2649	0.0333324				56.0077	0.0428838				55.6766	0.0518211
				20	0.05	22.6	20	56.2149	-0.0326103	56.2988	-0.0207633				56.4632	-0.00945096				56.5366	0.00170838				56.5238	0.0126062				56.4268	0.0231402				56.2483	0.0332169				55.992	0.0427531				55.6619	0.0516782
				20	0.05	22.65	20	56.1962	-0.0325934	56.2801	-0.0207718				56.4445	-0.00948352				56.5182	0.00165271				56.5059	0.0125287				56.4094	0.0230429				56.2317	0.0331019				55.9763	0.0426231				55.6472	0.0515359
				20	0.05	22.7	20	56.1775	-0.0325766	56.2615	-0.0207803				56.426	-0.00951588				56.4999	0.00159734				56.488	0.0124517				56.3921	0.022946				56.2152	0.0329874				55.9606	0.0424936				55.6325	0.0513943
				20	0.05	22.75	20	56.1589	-0.0325598	56.2429	-0.0207887				56.4075	-0.00954806				56.4816	0.00154225				56.4701	0.0123751				56.3749	0.0228496				56.1987	0.0328735				55.945	0.0423647				55.6179	0.0512534
				20	0.05	22.8	20	56.1403	-0.032543	56.2244	-0.020797				56.389	-0.00958005				56.4634	0.00148746				56.4523	0.0122988				56.3577	0.0227537				56.1822	0.0327601				55.9294	0.0422365				55.6033	0.0511131
				20	0.05	22.85	20	56.1218	-0.0325263	56.2058	-0.0208053				56.3705	-0.00961186				56.4452	0.00143295				56.4345	0.012223				56.3405	0.0226583				56.1657	0.0326473				55.9138	0.0421089				55.5887	0.0509735
				20	0.05	22.9	20	56.1033	-0.0325096	56.1874	-0.0208134				56.3521	-0.00964349				56.427	0.00137872				56.4168	0.0121475				56.3233	0.0225633				56.1493	0.0325351				55.8982	0.0419818				55.5741	0.0508346
				20	0.05	22.95	20	56.0848	-0.0324929	56.1689	-0.0208215				56.3337	-0.00967493				56.4089	0.00132478				56.3991	0.0120724				56.3062	0.0224688				56.1329	0.0324233				55.8827	0.0418554				55.5595	0.0506963
				20	0.05	23	20	56.0664	-0.0324763	56.1505	-0.0208295				56.3154	-0.00970619				56.3908	0.00127113				56.3814	0.0119976				56.2891	0.0223748				56.1165	0.0323122				55.8671	0.0417296				55.5449	0.0505586
				20	0.05	23.05	20	56.048	-0.0324597	56.1322	-0.0208375				56.2971	-0.00973727				56.3728	0.00121775				56.3637	0.0119233				56.272	0.0222812				56.1002	0.0322015				55.8516	0.0416044				55.5304	0.0504216
				20	0.05	23.1	20	56.0296	-0.0324432	56.1139	-0.0208454				56.2789	-0.00976817				56.3547	0.00116466				56.3461	0.0118493				56.2549	0.0221881				56.0838	0.0320914				55.8362	0.0414797				55.5159	0.0502852
				20	0.05	23.15	20	56.0113	-0.0324267	56.0956	-0.0208531				56.2606	-0.00979889				56.3368	0.00111184				56.3286	0.0117757				56.2379	0.0220954				56.0675	0.0319818				55.8207	0.0413557				55.5014	0.0501495
				20	0.05	23.2	20	55.993	-0.0324102	56.0773	-0.0208609				56.2425	-0.00982944				56.3188	0.0010593				56.311	0.0117024				56.221	0.0220032				56.0513	0.0318727				55.8053	0.0412322				55.4869	0.0500144
				20	0.05	23.25	20	55.9748	-0.0323937	56.0591	-0.0208685				56.2243	-0.0098598				56.3009	0.00100703				56.2935	0.0116296				56.204	0.0219114				56.035	0.0317642				55.7899	0.0411094				55.4725	0.0498799
				20	0.05	23.3	20	55.9566	-0.0323773	56.041	-0.0208761				56.2062	-0.00988999				56.283	0.000955044				56.276	0.0115571				56.1871	0.0218201				56.0188	0.0316562				55.7745	0.0409871				55.458	0.0497461
				20	0.05	23.35	20	55.9385	-0.032361	56.0228	-0.0208836				56.1881	-0.00992001				56.2652	0.000903327				56.2586	0.0114849				56.1702	0.0217292				56.0026	0.0315487				55.7592	0.0408654				55.4436	0.0496129
				20	0.05	23.4	20	55.9203	-0.0323446	56.0048	-0.020891				56.1701	-0.00994985				56.2474	0.000851882				56.2412	0.0114131				56.1534	0.0216388				55.9865	0.0314417				55.7438	0.0407442				55.4292	0.0494803
				20	0.05	23.45	20	55.9023	-0.0323283	55.9867	-0.0208983				56.1521	-0.00997951				56.2296	0.000800706				56.2238	0.0113417				56.1365	0.0215488				55.9704	0.0313352				55.7285	0.0406237				55.4149	0.0493483
				20	0.05	23.5	20	55.8842	-0.032312	55.9687	-0.0209056				56.1342	-0.010009				56.2119	0.0007498				56.2065	0.0112707				56.1198	0.0214593				55.9543	0.0312292				55.7132	0.0405037				55.4005	0.0492169
				20	0.05	23.55	20	55.8662	-0.0322958	55.9507	-0.0209128				56.1162	-0.0100383				56.1942	0.000699161				56.1892	0.0112				56.103	0.0213702				55.9382	0.0311238				55.698	0.0403843				55.3861	0.0490862
				20	0.05	23.6	20	55.8482	-0.0322796	55.9328	-0.0209199				56.0984	-0.0100675				56.1765	0.000648789				56.1719	0.0111296				56.0863	0.0212815				55.9221	0.0310188				55.6827	0.0402654				55.3718	0.048956
				20	0.05	23.65	20	55.8303	-0.0322634	55.9149	-0.020927				56.0805	-0.0100965				56.1589	0.000598681				56.1547	0.0110596				56.0696	0.0211933				55.9061	0.0309144				55.6675	0.0401471				55.3575	0.0488265
				20	0.05	23.7	20	55.8124	-0.0322473	55.897	-0.020934				56.0627	-0.0101253				56.1413	0.000548837				56.1375	0.01099				56.0529	0.0211055				55.8901	0.0308105				55.6523	0.0400293				55.3432	0.0486976
				20	0.05	23.75	20	55.7945	-0.0322312	55.8792	-0.0209409				56.0449	-0.0101539				56.1238	0.000499255				56.1203	0.0109207				56.0362	0.0210181				55.8742	0.030707				55.6372	0.0399121				55.329	0.0485692
				20	0.05	23.8	20	55.7767	-0.0322151	55.8614	-0.0209477				56.0272	-0.0101824				56.1062	0.000449934				56.1031	0.0108517				56.0196	0.0209312				55.8582	0.0306041				55.622	0.0397955				55.3147	0.0484415
				20	0.05	23.85	20	55.7589	-0.032199	55.8436	-0.0209545				56.0095	-0.0102107				56.0888	0.000400873				56.086	0.0107831				56.0031	0.0208446				55.8423	0.0305016				55.6069	0.0396794				55.3005	0.0483143
				20	0.05	23.9	20	55.7412	-0.032183	55.8259	-0.0209612				55.9918	-0.0102388				56.0713	0.000352069				56.0689	0.0107149				55.9865	0.0207585				55.8264	0.0303996				55.5918	0.0395639				55.2863	0.0481877
				20	0.05	23.95	20	55.7235	-0.0321671	55.8082	-0.0209679				55.9742	-0.0102668				56.0539	0.000303523				56.0519	0.010647				55.97	0.0206729				55.8105	0.0302982				55.5767	0.0394489				55.2721	0.0480618
				20	0.05	24	20	55.7058	-0.0321511	55.7905	-0.0209744				55.9566	-0.0102946				56.0365	0.000255232				56.0349	0.0105794				55.9535	0.0205876				55.7947	0.0301972				55.5616	0.0393344				55.2579	0.0479364
				20	0.05	24.05	20	55.6881	-0.0321352	55.7729	-0.0209809				55.939	-0.0103223				56.0191	0.000207196				56.0179	0.0105121				55.937	0.0205028				55.7789	0.0300966				55.5466	0.0392205				55.2437	0.0478115
				20	0.05	24.1	20	55.6705	-0.0321193	55.7553	-0.0209874				55.9215	-0.0103498				56.0018	0.000159413				56.001	0.0104453				55.9206	0.0204183				55.7631	0.0299966				55.5316	0.0391071				55.2296	0.0476873
				20	0.05	24.15	20	55.653	-0.0321035	55.7378	-0.0209937				55.904	-0.0103771				55.9845	0.000111881				55.984	0.0103787				55.9042	0.0203343				55.7473	0.0298971				55.5166	0.0389942				55.2155	0.0475636
				20	0.05	24.2	20	55.6354	-0.0320877	55.7203	-0.021				55.8865	-0.0104043				55.9673	6.45999e-05				55.9671	0.0103125				55.8878	0.0202507				55.7316	0.029798				55.5016	0.0388819				55.2014	0.0474405
				20	0.05	24.25	20	55.6179	-0.0320719	55.7028	-0.0210062				55.8691	-0.0104313				55.9501	1.7568e-05				55.9503	0.0102466				55.8714	0.0201675				55.7159	0.0296994				55.4867	0.0387701				55.1873	0.047318
				20	0.05	24.3	20	55.6005	-0.0320561	55.6854	-0.0210124				55.8517	-0.0104581				55.9329	-2.9216e-05				55.9335	0.010181				55.8551	0.0200847				55.7002	0.0296012				55.4717	0.0386588				55.1732	0.047196
				20	0.05	24.35	20	55.583	-0.0320404	55.668	-0.0210185				55.8343	-0.0104848				55.9157	-7.57533e-05				55.9167	0.0101158				55.8388	0.0200023				55.6846	0.0295036				55.4568	0.0385481				55.1592	0.0470746
				20	0.05	24.4	20	55.5656	-0.0320247	55.6506	-0.0210245				55.817	-0.0105113				55.8986	-0.000122045				55.8999	0.0100509				55.8226	0.0199203				55.6689	0.0294064				55.4419	0.0384379				55.1451	0.0469538
				20	0.05	24.45	20	55.5483	-0.0320091	55.6332	-0.0210305				55.7997	-0.0105377				55.8815	-0.000168093				55.8832	0.00998628				55.8063	0.0198387				55.6533	0.0293096				55.4271	0.0383281				55.1311	0.0468335
				20	0.05	24.5	20	55.5309	-0.0319934	55.6159	-0.0210364				55.7824	-0.0105639				55.8644	-0.000213898				55.8665	0.00992203				55.7901	0.0197575				55.6377	0.0292134				55.4122	0.0382189				55.1171	0.0467138
				20	0.05	24.55	20	55.5136	-0.0319778	55.5987	-0.0210422				55.7652	-0.01059				55.8474	-0.000259461				55.8498	0.00985809				55.7739	0.0196767				55.6222	0.0291175				55.3974	0.0381102				55.1031	0.0465946
				20	0.05	24.6	20	55.4964	-0.0319623	55.5814	-0.021048				55.748	-0.0106159				55.8304	-0.000304784				55.8331	0.00979448				55.7578	0.0195963				55.6066	0.0290222				55.3826	0.0380021				55.0892	0.0464759
				20	0.05	24.65	20	55.4791	-0.0319467	55.5642	-0.0210537				55.7309	-0.0106416				55.8135	-0.000349868				55.8165	0.00973118				55.7417	0.0195163				55.5911	0.0289273				55.3678	0.0378944				55.0752	0.0463579
				20	0.05	24.7	20	55.462	-0.0319312	55.5471	-0.0210594				55.7137	-0.0106672				55.7965	-0.000394713				55.7999	0.0096682				55.7256	0.0194367				55.5756	0.0288328				55.3531	0.0377872				55.0613	0.0462403
				20	0.05	24.75	20	55.4448	-0.0319158	55.5299	-0.0210649				55.6966	-0.0106927				55.7796	-0.000439322				55.7834	0.00960554				55.7095	0.0193574				55.5602	0.0287388				55.3384	0.0376805				55.0474	0.0461233
				20	0.05	24.8	20	55.4277	-0.0319003	55.5128	-0.0210704				55.6796	-0.010718				55.7628	-0.000483696				55.7669	0.00954319				55.6934	0.0192786				55.5447	0.0286452				55.3236	0.0375743				55.0335	0.0460068
				20	0.05	24.85	20	55.4106	-0.0318849	55.4957	-0.0210759				55.6625	-0.0107431				55.7459	-0.000527835				55.7504	0.00948116				55.6774	0.0192001				55.5293	0.0285521				55.3089	0.0374686				55.0196	0.0458909
				20	0.05	24.9	20	55.3935	-0.0318695	55.4787	-0.0210813				55.6455	-0.0107681				55.7291	-0.000571741				55.7339	0.00941943				55.6614	0.019122				55.5139	0.0284594				55.2943	0.0373634				55.0057	0.0457755
				20	0.05	24.95	20	55.3765	-0.0318542	55.4617	-0.0210866				55.6286	-0.010793				55.7124	-0.000615415				55.7175	0.00935801				55.6455	0.0190443				55.4986	0.0283672				55.2796	0.0372587				54.9919	0.0456606
				20	0.05	25	20	55.3595	-0.0318388	55.4447	-0.0210919				55.6117	-0.0108177				55.6956	-0.000658859				55.7011	0.00929691				55.6295	0.018967				55.4832	0.0282754				55.265	0.0371545				54.9781	0.0455462
				20	0.05	25.05	20	55.3425	-0.0318235	55.4278	-0.0210971				55.5948	-0.0108422				55.6789	-0.000702073				55.6847	0.0092361				55.6136	0.01889				55.4679	0.028184				55.2504	0.0370508				54.9642	0.0454324
				20	0.05	25.1	20	55.3256	-0.0318083	55.4109	-0.0211022				55.5779	-0.0108666				55.6622	-0.000745059				55.6683	0.0091756				55.5977	0.0188134				55.4526	0.0280931				55.2358	0.0369475				54.9504	0.0453191
				20	0.05	25.15	20	55.3087	-0.031793	55.394	-0.0211073				55.561	-0.0108909				55.6456	-0.000787817				55.652	0.00911541				55.5819	0.0187372				55.4374	0.0280026				55.2212	0.0368448				54.9367	0.0452062
				20	0.05	25.2	20	55.2918	-0.0317778	55.3771	-0.0211123				55.5442	-0.010915				55.629	-0.00083035				55.6357	0.00905552				55.566	0.0186614				55.4221	0.0279125				55.2066	0.0367425				54.9229	0.045094
				20	0.05	25.25	20	55.275	-0.0317626	55.3603	-0.0211173				55.5275	-0.010939				55.6124	-0.000872658				55.6194	0.00899592				55.5502	0.0185859				55.4069	0.0278229				55.1921	0.0366406				54.9092	0.0449822
				20	0.05	25.3	20	55.2582	-0.0317475	55.3436	-0.0211222				55.5107	-0.0109628				55.5958	-0.000914742				55.6032	0.00893663				55.5345	0.0185108				55.3917	0.0277337				55.1776	0.0365393				54.8954	0.0448709
				20	0.05	25.35	20	55.2414	-0.0317324	55.3268	-0.021127				55.494	-0.0109865				55.5793	-0.000956604				55.587	0.00887763				55.5187	0.018436				55.3765	0.0276449				55.1631	0.0364384				54.8817	0.0447601
				20	0.05	25.4	20	55.2247	-0.0317173	55.3101	-0.0211318				55.4773	-0.01101				55.5628	-0.000998245				55.5708	0.00881892				55.503	0.0183616				55.3614	0.0275565				55.1486	0.036338				54.868	0.0446499
				20	0.05	25.45	20	55.208	-0.0317022	55.2934	-0.0211365				55.4607	-0.0110334				55.5463	-0.00103966				55.5547	0.00876051				55.4873	0.0182876				55.3462	0.0274685				55.1342	0.0362381				54.8543	0.0445401
				20	0.05	25.5	20	55.1913	-0.0316872	55.2767	-0.0211412				55.4441	-0.0110567				55.5299	-0.00108087				55.5385	0.00870239				55.4716	0.0182139				55.3311	0.027381				55.1198	0.0361386				54.8407	0.0444309
				20	0.05	25.55	20	55.1747	-0.0316722	55.2601	-0.0211458				55.4275	-0.0110798				55.5134	-0.00112185				55.5225	0.00864457				55.456	0.0181406				55.316	0.0272938				55.1053	0.0360395				54.827	0.0443221
				20	0.05	25.6	20	55.1581	-0.0316572	55.2435	-0.0211503				55.4109	-0.0111028				55.4971	-0.00116262				55.5064	0.00858703				55.4403	0.0180677				55.301	0.0272071				55.0909	0.035941				54.8134	0.0442138
				20	0.05	25.65	20	55.1415	-0.0316422	55.227	-0.0211548				55.3944	-0.0111256				55.4807	-0.00120317				55.4903	0.00852978				55.4247	0.017995				55.2859	0.0271208				55.0766	0.0358429				54.7998	0.044106
				20	0.05	25.7	20	55.1249	-0.0316273	55.2104	-0.0211593				55.3779	-0.0111484				55.4644	-0.0012435				55.4743	0.00847281				55.4092	0.0179228				55.2709	0.0270349				55.0622	0.0357452				54.7862	0.0439987
				20	0.05	25.75	20	55.1084	-0.0316124	55.1939	-0.0211636				55.3614	-0.0111709				55.4481	-0.00128363				55.4583	0.00841613				55.3936	0.0178509				55.2559	0.0269494				55.0479	0.035648				54.7726	0.0438919
				20	0.05	25.8	20	55.0919	-0.0315976	55.1774	-0.0211679				55.345	-0.0111934				55.4318	-0.00132354				55.4424	0.00835973				55.3781	0.0177793				55.2409	0.0268643				55.0336	0.0355512				54.759	0.0437856
				20	0.05	25.85	20	55.0754	-0.0315827	55.161	-0.0211722				55.3286	-0.0112157				55.4156	-0.00136324				55.4265	0.00830362				55.3626	0.0177081				55.226	0.0267796				55.0193	0.0354549				54.7454	0.0436797
				20	0.05	25.9	20	55.059	-0.0315679	55.1446	-0.0211764				55.3122	-0.0112378				55.3994	-0.00140273				55.4105	0.00824778				55.3471	0.0176372				55.2111	0.0266953				55.005	0.035359				54.7319	0.0435743
				20	0.05	25.95	20	55.0426	-0.0315531	55.1282	-0.0211806				55.2958	-0.0112598				55.3832	-0.00144201				55.3947	0.00819222				55.3317	0.0175667				55.1962	0.0266114				54.9907	0.0352636				54.7184	0.0434694
				20	0.05	26	20	55.0263	-0.0315384	55.1119	-0.0211847				55.2795	-0.0112817				55.367	-0.00148108				55.3788	0.00813694				55.3162	0.0174965				55.1813	0.0265278				54.9765	0.0351686				54.7049	0.043365
				20	0.05	26.05	20	55.0099	-0.0315236	55.0955	-0.0211887				55.2632	-0.0113035				55.3509	-0.00151995				55.363	0.00808194				55.3008	0.0174267				55.1664	0.0264447				54.9623	0.035074				54.6914	0.0432611
				20	0.05	26.1	20	54.9936	-0.0315089	55.0792	-0.0211927				55.247	-0.0113251				55.3348	-0.00155861				55.3472	0.00802721				55.2855	0.0173571				55.1516	0.026362				54.9481	0.0349799				54.6779	0.0431576
				20	0.05	26.15	20	54.9773	-0.0314942	55.063	-0.0211966				55.2307	-0.0113466				55.3188	-0.00159707				55.3314	0.00797275				55.2701	0.017288				55.1368	0.0262796				54.9339	0.0348862				54.6644	0.0430545
				20	0.05	26.2	20	54.9611	-0.0314796	55.0467	-0.0212005				55.2145	-0.011368				55.3027	-0.00163532				55.3157	0.00791857				55.2548	0.0172191				55.122	0.0261977				54.9197	0.0347929				54.651	0.042952
				20	0.05	26.25	20	54.9449	-0.031465	55.0305	-0.0212043				55.1983	-0.0113892				55.2867	-0.00167337				55.3	0.00786465				55.2395	0.0171506				55.1072	0.0261161				54.9056	0.0347001				54.6376	0.0428499
				20	0.05	26.3	20	54.9287	-0.0314504	55.0144	-0.0212081				55.1822	-0.0114103				55.2707	-0.00171122				55.2843	0.007811				55.2242	0.0170824				55.0924	0.0260349				54.8914	0.0346077				54.6241	0.0427482
				20	0.05	26.35	20	54.9125	-0.0314358	54.9982	-0.0212118				55.1661	-0.0114313				55.2548	-0.00174887				55.2686	0.00775762				55.2089	0.0170145				55.0777	0.0259541				54.8773	0.0345157				54.6107	0.042647
				20	0.05	26.4	20	54.8964	-0.0314212	54.9821	-0.0212154				55.15	-0.0114522				55.2388	-0.00178632				55.253	0.00770451				55.1937	0.016947				55.063	0.0258737				54.8632	0.0344241				54.5974	0.0425463
				20	0.05	26.45	20	54.8803	-0.0314067	54.966	-0.021219				55.1339	-0.0114729				55.2229	-0.00182357				55.2373	0.00765166				55.1785	0.0168798				55.0483	0.0257936				54.8492	0.034333				54.584	0.042446
				20	0.05	26.5	20	54.8642	-0.0313922	54.9499	-0.0212226				55.1179	-0.0114935				55.2071	-0.00186062				55.2218	0.00759907				55.1633	0.0168129				55.0336	0.0257139				54.8351	0.0342422				54.5706	0.0423461
				20	0.05	26.55	20	54.8481	-0.0313778	54.9339	-0.0212261				55.1019	-0.011514				55.1912	-0.00189748				55.2062	0.00754675				55.1481	0.0167463				55.019	0.0256346				54.8211	0.0341519				54.5573	0.0422467
				20	0.05	26.6	20	54.8321	-0.0313633	54.9179	-0.0212295				55.0859	-0.0115343				55.1754	-0.00193414				55.1906	0.00749468				55.133	0.0166801				55.0043	0.0255557				54.807	0.034062				54.544	0.0421478
				20	0.05	26.65	20	54.8161	-0.0313489	54.9019	-0.0212329				55.07	-0.0115546				55.1596	-0.00197061				55.1751	0.00744287				55.1179	0.0166141				54.9897	0.0254771				54.793	0.0339725				54.5307	0.0420493
				20	0.05	26.7	20	54.8002	-0.0313345	54.886	-0.0212363				55.054	-0.0115747				55.1438	-0.00200689				55.1596	0.00739133				55.1028	0.0165485				54.9752	0.0253989				54.7791	0.0338834				54.5174	0.0419512
				20	0.05	26.75	20	54.7842	-0.0313201	54.8701	-0.0212396				55.0381	-0.0115946				55.1281	-0.00204297				55.1442	0.00734003				55.0877	0.0164832				54.9606	0.025321				54.7651	0.0337947				54.5041	0.0418535
				20	0.05	26.8	20	54.7683	-0.0313058	54.8542	-0.0212428				55.0223	-0.0116145				55.1124	-0.00207886				55.1287	0.007289				55.0727	0.0164182				54.946	0.0252435				54.7512	0.0337064				54.4908	0.0417563
				20	0.05	26.85	20	54.7524	-0.0312915	54.8383	-0.021246				55.0064	-0.0116342				55.0967	-0.00211457				55.1133	0.00723821				55.0577	0.0163535				54.9315	0.0251664				54.7372	0.0336185				54.4776	0.0416596
				20	0.05	26.9	20	54.7366	-0.0312772	54.8225	-0.0212492				54.9906	-0.0116538				55.081	-0.00215008				55.0979	0.00718768				55.0427	0.0162892				54.917	0.0250896				54.7233	0.033531				54.4643	0.0415632
				20	0.05	26.95	20	54.7208	-0.0312629	54.8066	-0.0212523				54.9748	-0.0116733				55.0654	-0.00218541				55.0826	0.0071374				55.0277	0.0162251				54.9025	0.0250132				54.7094	0.033444				54.4511	0.0414673
				20	0.05	27	20	54.705	-0.0312487	54.7909	-0.0212553				54.9591	-0.0116927				55.0498	-0.00222054				55.0672	0.00708737				55.0127	0.0161613				54.8881	0.0249372				54.6955	0.0333573				54.4379	0.0413718
				20	0.05	27.05	20	54.6892	-0.0312345	54.7751	-0.0212583				54.9433	-0.0117119				55.0342	-0.0022555				55.0519	0.00703758				54.9978	0.0160979				54.8736	0.0248615				54.6817	0.0332709				54.4247	0.0412767
				20	0.05	27.1	20	54.6735	-0.0312203	54.7594	-0.0212612				54.9276	-0.0117311				55.0186	-0.00229027				55.0366	0.00698804				54.9829	0.0160347				54.8592	0.0247861				54.6678	0.033185				54.4115	0.0411821
				20	0.05	27.15	20	54.6577	-0.0312061	54.7437	-0.0212641				54.9119	-0.0117501				55.0031	-0.00232485				55.0214	0.00693875				54.968	0.0159719				54.8448	0.0247111				54.654	0.0330995				54.3983	0.0410878
				20	0.05	27.2	20	54.6421	-0.031192	54.728	-0.021267				54.8963	-0.011769				54.9876	-0.00235925				55.0061	0.00688971				54.9531	0.0159093				54.8304	0.0246364				54.6402	0.0330144				54.3852	0.040994
				20	0.05	27.25	20	54.6264	-0.0311779	54.7123	-0.0212698				54.8807	-0.0117878				54.9721	-0.00239347				54.9909	0.0068409				54.9383	0.0158471				54.8161	0.0245621				54.6264	0.0329296				54.3721	0.0409006
				20	0.05	27.3	20	54.6108	-0.0311638	54.6967	-0.0212725				54.8651	-0.0118064				54.9566	-0.00242751				54.9757	0.00679234				54.9235	0.0157851				54.8017	0.0244882				54.6126	0.0328452				54.3589	0.0408076
				20	0.05	27.35	20	54.5952	-0.0311497	54.6811	-0.0212752				54.8495	-0.011825				54.9412	-0.00246136				54.9605	0.00674402				54.9087	0.0157235				54.7874	0.0244145				54.5989	0.0327612				54.3458	0.040715
				20	0.05	27.4	20	54.5796	-0.0311356	54.6656	-0.0212779				54.8339	-0.0118434				54.9258	-0.00249504				54.9454	0.00669593				54.8939	0.0156621				54.7731	0.0243412				54.5851	0.0326776				54.3327	0.0406228
				20	0.05	27.45	20	54.564	-0.0311216	54.65	-0.0212805				54.8184	-0.0118617				54.9104	-0.00252854				54.9303	0.00664809				54.8791	0.015601				54.7588	0.0242683				54.5714	0.0325944				54.3197	0.0405311
				20	0.05	27.5	20	54.5485	-0.0311076	54.6345	-0.0212831				54.8029	-0.01188				54.8951	-0.00256186				54.9152	0.00660048				54.8644	0.0155402				54.7445	0.0241957				54.5577	0.0325115				54.3066	0.0404397
				20	0.05	27.55	20	54.533	-0.0310936	54.619	-0.0212856				54.7875	-0.0118981				54.8797	-0.00259501				54.9001	0.00655311				54.8497	0.0154797				54.7303	0.0241234				54.544	0.032429				54.2935	0.0403487
				20	0.05	27.6	20	54.5175	-0.0310797	54.6035	-0.0212881				54.772	-0.011916				54.8644	-0.00262798				54.885	0.00650597				54.835	0.0154195				54.7161	0.0240515				54.5304	0.0323469				54.2805	0.0402581
				20	0.05	27.65	20	54.5021	-0.0310658	54.5881	-0.0212905				54.7566	-0.0119339				54.8491	-0.00266078				54.87	0.00645906				54.8203	0.0153596				54.7019	0.0239798				54.5167	0.0322651				54.2675	0.040168
				20	0.05	27.7	20	54.4866	-0.0310519	54.5727	-0.0212929				54.7412	-0.0119517				54.8339	-0.0026934				54.855	0.00641239				54.8057	0.0152999				54.6877	0.0239085				54.5031	0.0321837				54.2545	0.0400782
				20	0.05	27.75	20	54.4713	-0.031038	54.5573	-0.0212952				54.7258	-0.0119693				54.8186	-0.00272585				54.84	0.00636594				54.7911	0.0152406				54.6735	0.0238376				54.4894	0.0321027				54.2415	0.0399888
				20	0.05	27.8	20	54.4559	-0.0310241	54.5419	-0.0212975				54.7105	-0.0119869				54.8034	-0.00275813				54.825	0.00631973				54.7765	0.0151815				54.6594	0.023767				54.4758	0.032022				54.2285	0.0398998
				20	0.05	27.85	20	54.4405	-0.0310103	54.5266	-0.0212997				54.6952	-0.0120043				54.7883	-0.00279023				54.8101	0.00627374				54.7619	0.0151227				54.6452	0.0236966				54.4623	0.0319417				54.2155	0.0398112
				20	0.05	27.9	20	54.4252	-0.0309965	54.5113	-0.0213019				54.6799	-0.0120216				54.7731	-0.00282217				54.7952	0.00622798				54.7473	0.0150642				54.6311	0.0236267				54.4487	0.0318618				54.2026	0.0397229
				20	0.05	27.95	20	54.4099	-0.0309827	54.496	-0.0213041				54.6646	-0.0120388				54.758	-0.00285394				54.7803	0.00618244				54.7328	0.0150059				54.617	0.023557				54.4351	0.0317822				54.1896	0.0396351
				20	0.05	28	20	54.3946	-0.0309689	54.4807	-0.0213062				54.6493	-0.0120559				54.7428	-0.00288554				54.7654	0.00613713				54.7183	0.0149479				54.6029	0.0234876				54.4216	0.031703				54.1767	0.0395476
				20	0.05	28.05	20	54.3794	-0.0309552	54.4655	-0.0213082				54.6341	-0.0120729				54.7278	-0.00291697				54.7506	0.00609205				54.7038	0.0148902				54.5889	0.0234186				54.4081	0.0316241				54.1638	0.0394605
				20	0.05	28.1	20	54.3642	-0.0309415	54.4503	-0.0213102				54.6189	-0.0120898				54.7127	-0.00294824				54.7358	0.00604718				54.6893	0.0148328				54.5748	0.0233499				54.3946	0.0315455				54.1509	0.0393738
				20	0.05	28.15	20	54.349	-0.0309278	54.4351	-0.0213122				54.6038	-0.0121066				54.6976	-0.00297934				54.721	0.00600254				54.6748	0.0147757				54.5608	0.0232815				54.3811	0.0314674				54.138	0.0392875
				20	0.05	28.2	20	54.3338	-0.0309141	54.4199	-0.0213142				54.5886	-0.0121233				54.6826	-0.00301028				54.7062	0.00595811				54.6604	0.0147188				54.5468	0.0232134				54.3676	0.0313895				54.1251	0.0392015
				20	0.05	28.25	20	54.3187	-0.0309004	54.4048	-0.021316				54.5735	-0.0121398				54.6676	-0.00304105				54.6914	0.0059139				54.646	0.0146622				54.5328	0.0231456				54.3541	0.031312				54.1122	0.039116
				20	0.05	28.3	20	54.3036	-0.0308868	54.3897	-0.0213179				54.5584	-0.0121563				54.6527	-0.00307166				54.6767	0.00586991				54.6316	0.0146058				54.5189	0.0230781				54.3407	0.0312349				54.0994	0.0390307
				20	0.05	28.35	20	54.2885	-0.0308732	54.3746	-0.0213197				54.5433	-0.0121727				54.6377	-0.00310211				54.662	0.00582614				54.6172	0.0145497				54.5049	0.023011				54.3273	0.0311581				54.0866	0.0389459
				20	0.05	28.4	20	54.2734	-0.0308596	54.3595	-0.0213214				54.5283	-0.012189				54.6228	-0.0031324				54.6473	0.00578258				54.6028	0.0144939				54.491	0.0229441				54.3138	0.0310816				54.0737	0.0388614
				20	0.05	28.45	20	54.2583	-0.030846	54.3445	-0.0213232				54.5132	-0.0122051				54.6079	-0.00316253				54.6326	0.00573924				54.5885	0.0144383				54.4771	0.0228776				54.3005	0.0310055				54.0609	0.0387773
				20	0.05	28.5	20	54.2433	-0.0308325	54.3295	-0.0213248				54.4982	-0.0122212				54.593	-0.0031925				54.618	0.00569611				54.5742	0.014383				54.4632	0.0228113				54.2871	0.0309297				54.0481	0.0386935
				20	0.05	28.55	20	54.2283	-0.030819	54.3145	-0.0213265				54.4833	-0.0122371				54.5781	-0.00322231				54.6033	0.00565318				54.5599	0.014328				54.4493	0.0227454				54.2737	0.0308542				54.0354	0.0386101
				20	0.05	28.6	20	54.2133	-0.0308055	54.2995	-0.0213281				54.4683	-0.012253				54.5633	-0.00325196				54.5887	0.00561047				54.5456	0.0142732				54.4355	0.0226797				54.2604	0.0307791				54.0226	0.0385271
				20	0.05	28.65	20	54.1984	-0.030792	54.2846	-0.0213296				54.4534	-0.0122687				54.5485	-0.00328146				54.5741	0.00556797				54.5313	0.0142187				54.4217	0.0226144				54.247	0.0307043				54.0098	0.0384444
				20	0.05	28.7	20	54.1835	-0.0307786	54.2697	-0.0213311				54.4385	-0.0122844				54.5337	-0.0033108				54.5596	0.00552568				54.5171	0.0141644				54.4078	0.0225493				54.2337	0.0306299				53.9971	0.0383621
				20	0.05	28.75	20	54.1686	-0.0307651	54.2548	-0.0213326				54.4236	-0.0123				54.5189	-0.00333998				54.545	0.0054836				54.5029	0.0141104				54.394	0.0224845				54.2204	0.0305557				53.9844	0.0382801
				20	0.05	28.8	20	54.1537	-0.0307517	54.2399	-0.021334				54.4087	-0.0123154				54.5042	-0.00336901				54.5305	0.00544172				54.4887	0.0140566				54.3802	0.0224201				54.2071	0.0304819				53.9716	0.0381985
				20	0.05	28.85	20	54.1388	-0.0307383	54.225	-0.0213354				54.3939	-0.0123308				54.4895	-0.00339789				54.516	0.00540004				54.4745	0.0140031				54.3665	0.0223559				54.1939	0.0304084				53.9589	0.0381172
				20	0.05	28.9	20	54.124	-0.0307249	54.2102	-0.0213368				54.379	-0.0123461				54.4748	-0.00342661				54.5015	0.00535857				54.4604	0.0139498				54.3527	0.022292				54.1806	0.0303353				53.9462	0.0380362
				20	0.05	28.95	20	54.1092	-0.0307116	54.1954	-0.0213381				54.3643	-0.0123612				54.4601	-0.00345519				54.4871	0.0053173				54.4462	0.0138968				54.339	0.0222284				54.1674	0.0302624				53.9336	0.0379557
				20	0.05	29	20	54.0944	-0.0306983	54.1806	-0.0213393				54.3495	-0.0123763				54.4454	-0.00348361				54.4726	0.00527623				54.4321	0.013844				54.3253	0.0221651				54.1541	0.0301899				53.9209	0.0378754
				20	0.05	29.05	20	54.0796	-0.030685	54.1659	-0.0213406				54.3347	-0.0123913				54.4308	-0.00351188				54.4582	0.00523537				54.418	0.0137915				54.3116	0.022102				54.1409	0.0301177				53.9082	0.0377955
				20	0.05	29.1	20	54.0649	-0.0306717	54.1511	-0.0213418				54.32	-0.0124061				54.4162	-0.00354				54.4438	0.0051947				54.4039	0.0137392				54.2979	0.0220393				54.1277	0.0300458				53.8956	0.0377159
				20	0.05	29.15	20	54.0502	-0.0306584	54.1364	-0.0213429				54.3053	-0.0124209				54.4016	-0.00356797				54.4294	0.00515423				54.3898	0.0136872				54.2843	0.0219768				54.1145	0.0299742				53.883	0.0376367
				20	0.05	29.2	20	54.0355	-0.0306452	54.1217	-0.021344				54.2906	-0.0124356				54.387	-0.0035958				54.4151	0.00511396				54.3758	0.0136354				54.2706	0.0219146				54.1014	0.0299029				53.8704	0.0375578
				20	0.05	29.25	20	54.0208	-0.0306319	54.1071	-0.0213451				54.276	-0.0124502				54.3725	-0.00362348				54.4008	0.00507389				54.3618	0.0135839				54.257	0.0218527				54.0882	0.029832				53.8578	0.0374793
				20	0.05	29.3	20	54.0062	-0.0306187	54.0924	-0.0213461				54.2613	-0.0124647				54.358	-0.00365101				54.3864	0.00503401				54.3478	0.0135325				54.2434	0.0217911				54.0751	0.0297613				53.8452	0.037401
				20	0.05	29.35	20	53.9915	-0.0306055	54.0778	-0.0213471				54.2467	-0.0124791				54.3435	-0.0036784				54.3722	0.00499432				54.3338	0.0134815				54.2298	0.0217297				54.062	0.029691				53.8326	0.0373231
				20	0.05	29.4	20	53.9769	-0.0305924	54.0632	-0.0213481				54.2321	-0.0124935				54.329	-0.00370564				54.3579	0.00495483				54.3198	0.0134306				54.2162	0.0216687				54.0489	0.0296209				53.82	0.0372456
				20	0.05	29.45	20	53.9623	-0.0305792	54.0486	-0.021349				54.2175	-0.0125077				54.3145	-0.00373274				54.3436	0.00491553				54.3059	0.01338				54.2026	0.0216078				54.0358	0.0295512				53.8075	0.0371683
				20	0.05	29.5	20	53.9478	-0.0305661	54.0341	-0.0213499				54.203	-0.0125218				54.3001	-0.0037597				54.3294	0.00487642				54.2919	0.0133297				54.1891	0.0215473				54.0227	0.0294818				53.7949	0.0370914
				20	0.05	29.55	20	53.9332	-0.030553	54.0195	-0.0213508				54.1885	-0.0125359				54.2857	-0.00378651				54.3152	0.0048375				54.278	0.0132795				54.1756	0.021487				54.0096	0.0294127				53.7824	0.0370148
				20	0.05	29.6	20	53.9187	-0.0305399	54.005	-0.0213516				54.174	-0.0125498				54.2713	-0.00381319				54.301	0.00479877				54.2641	0.0132296				54.1621	0.021427				53.9966	0.0293438				53.7699	0.0369386
				20	0.05	29.65	20	53.9042	-0.0305269	53.9905	-0.0213524				54.1595	-0.0125637				54.2569	-0.00383972				54.2868	0.00476023				54.2502	0.0131799				54.1486	0.0213673				53.9836	0.0292753				53.7574	0.0368626
				20	0.05	29.7	20	53.8898	-0.0305138	53.9761	-0.0213531				54.145	-0.0125774				54.2425	-0.00386611				54.2727	0.00472187				54.2364	0.0131305				54.1351	0.0213079				53.9705	0.0292071				53.7449	0.036787
				20	0.05	29.75	20	53.8753	-0.0305008	53.9616	-0.0213538				54.1306	-0.0125911				54.2282	-0.00389236				54.2585	0.0046837				54.2226	0.0130813				54.1216	0.0212487				53.9575	0.0291391				53.7324	0.0367117
				20	0.05	29.8	20	53.8609	-0.0304878	53.9472	-0.0213545				54.1162	-0.0126047				54.2139	-0.00391848				54.2444	0.00464572				54.2087	0.0130323				54.1082	0.0211897				53.9445	0.0290715				53.7199	0.0366367
				20	0.05	29.85	20	53.8465	-0.0304748	53.9328	-0.0213551				54.1018	-0.0126182				54.1996	-0.00394445				54.2303	0.00460792				54.1949	0.0129835				54.0948	0.0211311				53.9316	0.0290041				53.7075	0.036562
				20	0.05	29.9	20	53.8321	-0.0304618	53.9184	-0.0213557				54.0874	-0.0126317				54.1853	-0.00397029				54.2162	0.0045703				54.1811	0.012935				54.0813	0.0210726				53.9186	0.028937				53.695	0.0364876
				20	0.05	29.95	20	53.8177	-0.0304489	53.904	-0.0213563				54.073	-0.012645				54.171	-0.003996				54.2022	0.00453286				54.1674	0.0128867				54.0679	0.0210145				53.9057	0.0288702				53.6826	0.0364136
				20	0.05	30	20	53.8034	-0.030436	53.8897	-0.0213568				54.0587	-0.0126582				54.1568	-0.00402157				54.1882	0.00449561				54.1536	0.0128386				54.0546	0.0209566				53.8927	0.0288038				53.6702	0.0363398
				20	0.05	30.05	20	53.7891	-0.0304231	53.8754	-0.0213573				54.0444	-0.0126714				54.1426	-0.004047				54.1741	0.00445853				54.1399	0.0127907				54.0412	0.0208989				53.8798	0.0287375				53.6578	0.0362663
				20	0.05	30.1	20	53.7748	-0.0304102	53.8611	-0.0213577				54.0301	-0.0126845				54.1284	-0.0040723				54.1601	0.00442164				54.1262	0.012743				54.0279	0.0208416				53.8669	0.0286716				53.6454	0.0361932
				20	0.05	30.15	20	53.7605	-0.0303973	53.8468	-0.0213581				54.0158	-0.0126975				54.1142	-0.00409746				54.1462	0.00438492				54.1125	0.0126956				54.0145	0.0207844				53.854	0.028606				53.633	0.0361204
				20	0.05	30.2	20	53.7462	-0.0303844	53.8325	-0.0213585				54.0015	-0.0127104				54.1001	-0.0041225				54.1322	0.00434838				54.0988	0.0126484				54.0012	0.0207275				53.8411	0.0285406				53.6206	0.0360478
				20	0.05	30.25	20	53.732	-0.0303716	53.8183	-0.0213589				53.9873	-0.0127232				54.0859	-0.0041474				54.1183	0.00431202				54.0851	0.0126014				53.9879	0.0206709				53.8283	0.0284755				53.6083	0.0359756
				20	0.05	30.3	20	53.7178	-0.0303588	53.8041	-0.0213592				53.9731	-0.0127359				54.0718	-0.00417217				54.1043	0.00427583				54.0715	0.0125546				53.9746	0.0206145				53.8154	0.0284107				53.5959	0.0359036
				20	0.05	30.35	20	53.7036	-0.030346	53.7899	-0.0213595				53.9589	-0.0127486				54.0577	-0.00419681				54.0904	0.00423982				54.0579	0.012508				53.9614	0.0205584				53.8026	0.0283462				53.5836	0.035832
				20	0.05	30.4	20	53.6894	-0.0303332	53.7757	-0.0213597				53.9447	-0.0127612				54.0437	-0.00422132				54.0765	0.00420398				54.0443	0.0124617				53.9481	0.0205025				53.7898	0.0282819				53.5712	0.0357607
				20	0.05	30.45	20	53.6753	-0.0303205	53.7616	-0.02136				53.9306	-0.0127737				54.0296	-0.0042457				54.0627	0.00416831				54.0307	0.0124155				53.9349	0.0204469				53.777	0.0282179				53.5589	0.0356896
				20	0.05	30.5	20	53.6611	-0.0303077	53.7474	-0.0213601				53.9165	-0.0127861				54.0156	-0.00426995				54.0488	0.00413281				54.0171	0.0123696				53.9217	0.0203915				53.7642	0.0281542				53.5466	0.0356188
				20	0.05	30.55	20	53.647	-0.030295	53.7333	-0.0213603				53.9023	-0.0127984				54.0016	-0.00429408				54.035	0.00409748				54.0035	0.0123239				53.9085	0.0203363				53.7514	0.0280908				53.5343	0.0355484
				20	0.05	30.6	20	53.6329	-0.0302823	53.7192	-0.0213604				53.8883	-0.0128107				53.9876	-0.00431808				54.0212	0.00406233				53.99	0.0122783				53.8953	0.0202814				53.7386	0.0280276				53.5221	0.0354782
				20	0.05	30.65	20	53.6189	-0.0302696	53.7052	-0.0213605				53.8742	-0.0128228				53.9736	-0.00434195				54.0074	0.00402734				53.9765	0.012233				53.8821	0.0202267				53.7259	0.0279647				53.5098	0.0354083
				20	0.05	30.7	20	53.6048	-0.030257	53.6911	-0.0213605				53.8601	-0.0128349				53.9596	-0.0043657				53.9936	0.00399252				53.963	0.0121879				53.8689	0.0201723				53.7131	0.027902				53.4975	0.0353387
				20	0.05	30.75	20	53.5908	-0.0302443	53.6771	-0.0213606				53.8461	-0.0128469				53.9457	-0.00438932				53.9799	0.00395787				53.9495	0.012143				53.8558	0.0201181				53.7004	0.0278397				53.4853	0.0352694
				20	0.05	30.8	20	53.5768	-0.0302317	53.6631	-0.0213606				53.8321	-0.0128588				53.9318	-0.00441282				53.9661	0.00392338				53.936	0.0120983				53.8427	0.0200642				53.6877	0.0277776				53.4731	0.0352003
				20	0.05	30.85	20	53.5628	-0.0302191	53.6491	-0.0213605				53.8181	-0.0128707				53.9179	-0.00443619				53.9524	0.00388906				53.9225	0.0120538				53.8295	0.0200104				53.675	0.0277157				53.4608	0.0351316
				20	0.05	30.9	20	53.5488	-0.0302065	53.6351	-0.0213604				53.8041	-0.0128825				53.904	-0.00445944				53.9387	0.0038549				53.9091	0.0120095				53.8164	0.0199569				53.6623	0.0276541				53.4486	0.0350631
				20	0.05	30.95	20	53.5348	-0.0301939	53.6212	-0.0213603				53.7902	-0.0128942				53.8901	-0.00448257				53.925	0.00382091				53.8957	0.0119654				53.8034	0.0199037				53.6496	0.0275928				53.4364	0.0349949
				20	0.05	31	20	53.5209	-0.0301814	53.6072	-0.0213602				53.7762	-0.0129058				53.8763	-0.00450558				53.9113	0.00378708				53.8823	0.0119215				53.7903	0.0198507				53.637	0.0275317				53.4242	0.034927
				20	0.05	31.05	20	53.507	-0.0301688	53.5933	-0.02136				53.7623	-0.0129173				53.8624	-0.00452846				53.8977	0.00375341				53.8689	0.0118778				53.7772	0.0197979				53.6243	0.0274709				53.4121	0.0348593
				20	0.05	31.1	20	53.4931	-0.0301563	53.5794	-0.0213598				53.7484	-0.0129288				53.8486	-0.00455123				53.8841	0.0037199				53.8555	0.0118343				53.7642	0.0197453				53.6117	0.0274103				53.3999	0.0347919
				20	0.05	31.15	20	53.4792	-0.0301438	53.5656	-0.0213596				53.7346	-0.0129402				53.8349	-0.00457388				53.8704	0.00368655				53.8422	0.011791				53.7512	0.019693				53.5991	0.02735				53.3877	0.0347248
				20	0.05	31.2	20	53.4654	-0.0301313	53.5517	-0.0213593				53.7207	-0.0129515				53.8211	-0.00459641				53.8569	0.00365336				53.8288	0.0117479				53.7382	0.0196408				53.5865	0.0272899				53.3756	0.034658
				20	0.05	31.25	20	53.4516	-0.0301188	53.5379	-0.0213591				53.7069	-0.0129627				53.8073	-0.00461882				53.8433	0.00362033				53.8155	0.011705				53.7252	0.019589				53.5739	0.0272301				53.3635	0.0345915
				20	0.05	31.3	20	53.4377	-0.0301064	53.524	-0.0213587				53.693	-0.0129739				53.7936	-0.00464111				53.8297	0.00358746				53.8022	0.0116623				53.7122	0.0195373				53.5613	0.0271706				53.3513	0.0345252
				20	0.05	31.35	20	53.4239	-0.030094	53.5102	-0.0213584				53.6792	-0.012985				53.7799	-0.00466328				53.8162	0.00355474				53.7889	0.0116198				53.6992	0.0194859				53.5487	0.0271113				53.3392	0.0344591
				20	0.05	31.4	20	53.4102	-0.0300815	53.4965	-0.021358				53.6655	-0.012996				53.7662	-0.00468534				53.8026	0.00352218				53.7756	0.0115774				53.6863	0.0194346				53.5362	0.0270522				53.3271	0.0343934
				20	0.05	31.45	20	53.3964	-0.0300691	53.4827	-0.0213576				53.6517	-0.0130069				53.7525	-0.00470728				53.7891	0.00348977				53.7624	0.0115353				53.6734	0.0193836				53.5236	0.0269934				53.3151	0.0343279
				20	0.05	31.5	20	53.3827	-0.0300568	53.469	-0.0213572				53.638	-0.0130178				53.7389	-0.00472911				53.7756	0.00345752				53.7491	0.0114933				53.6604	0.0193329				53.5111	0.0269348				53.303	0.0342627
				20	0.05	31.55	20	53.369	-0.0300444	53.4553	-0.0213567				53.6242	-0.0130286				53.7252	-0.00475083				53.7622	0.00342542				53.7359	0.0114516				53.6475	0.0192823				53.4986	0.0268765				53.2909	0.0341977
				20	0.05	31.6	20	53.3552	-0.0300321	53.4415	-0.0213562				53.6105	-0.0130393				53.7116	-0.00477243				53.7487	0.00339347				53.7227	0.01141				53.6346	0.0192319				53.4861	0.0268184				53.2789	0.034133
				20	0.05	31.65	20	53.3416	-0.0300197	53.4279	-0.0213557				53.5968	-0.0130499				53.698	-0.00479391				53.7353	0.00336168				53.7095	0.0113686				53.6218	0.0191818				53.4736	0.0267605				53.2668	0.0340685
				20	0.05	31.7	20	53.3279	-0.0300074	53.4142	-0.0213551				53.5832	-0.0130605				53.6844	-0.00481529				53.7218	0.00333003				53.6963	0.0113274				53.6089	0.0191319				53.4611	0.0267029				53.2548	0.0340043
				20	0.05	31.75	20	53.3143	-0.0299951	53.4006	-0.0213545				53.5695	-0.013071				53.6708	-0.00483655				53.7084	0.00329854				53.6831	0.0112863				53.596	0.0190822				53.4487	0.0266455				53.2428	0.0339404
				20	0.05	31.8	20	53.3006	-0.0299828	53.3869	-0.0213539				53.5559	-0.0130815				53.6573	-0.0048577				53.695	0.00326719				53.67	0.0112455				53.5832	0.0190327				53.4362	0.0265884				53.2307	0.0338767
				20	0.05	31.85	20	53.287	-0.0299706	53.3733	-0.0213533				53.5423	-0.0130918				53.6437	-0.00487874				53.6817	0.003236				53.6569	0.0112048				53.5704	0.0189834				53.4238	0.0265315				53.2187	0.0338133
				20	0.05	31.9	20	53.2734	-0.0299583	53.3597	-0.0213526				53.5287	-0.0131021				53.6302	-0.00489967				53.6683	0.00320495				53.6437	0.0111643				53.5576	0.0189344				53.4113	0.0264748				53.2068	0.0337501
				20	0.05	31.95	20	53.2599	-0.0299461	53.3461	-0.0213519				53.5151	-0.0131123				53.6167	-0.00492049				53.655	0.00317404				53.6306	0.011124				53.5448	0.0188855				53.3989	0.0264184				53.1948	0.0336872
				20	0.05	32	20	53.2463	-0.0299339	53.3326	-0.0213512				53.5015	-0.0131225				53.6032	-0.0049412				53.6417	0.00314328				53.6175	0.0110839				53.532	0.0188369				53.3865	0.0263622				53.1828	0.0336245
				20	0.05	32.05	20	53.2328	-0.0299217	53.3191	-0.0213504				53.488	-0.0131326				53.5898	-0.0049618				53.6283	0.00311267				53.6045	0.011044				53.5193	0.0187884				53.3741	0.0263062				53.1708	0.0335621
				20	0.05	32.1	20	53.2193	-0.0299095	53.3055	-0.0213497				53.4745	-0.0131426				53.5763	-0.0049823				53.6151	0.0030822				53.5914	0.0110042				53.5065	0.0187402				53.3618	0.0262505				53.1589	0.0334999
				20	0.05	32.15	20	53.2058	-0.0298973	53.292	-0.0213488				53.4609	-0.0131525				53.5629	-0.00500269				53.6018	0.00305188				53.5784	0.0109646				53.4938	0.0186922				53.3494	0.026195				53.147	0.0334379
				20	0.05	32.2	20	53.1923	-0.0298852	53.2785	-0.021348				53.4475	-0.0131624				53.5495	-0.00502297				53.5885	0.0030217				53.5654	0.0109252				53.481	0.0186443				53.337	0.0261397				53.135	0.0333762
				20	0.05	32.25	20	53.1788	-0.0298731	53.2651	-0.0213472				53.434	-0.0131722				53.5361	-0.00504314				53.5753	0.00299166				53.5523	0.010886				53.4683	0.0185967				53.3247	0.0260846				53.1231	0.0333148
				20	0.05	32.3	20	53.1654	-0.0298609	53.2516	-0.0213463				53.4205	-0.013182				53.5227	-0.00506321				53.5621	0.00296176				53.5393	0.0108469				53.4556	0.0185493				53.3124	0.0260298				53.1112	0.0332536
				20	0.05	32.35	20	53.152	-0.0298488	53.2382	-0.0213454				53.4071	-0.0131917				53.5093	-0.00508318				53.5488	0.002932				53.5264	0.010808				53.443	0.0185021				53.3	0.0259751				53.0993	0.0331926
				20	0.05	32.4	20	53.1385	-0.0298368	53.2248	-0.0213444				53.3937	-0.0132013				53.496	-0.00510304				53.5356	0.00290238				53.5134	0.0107693				53.4303	0.018455				53.2877	0.0259207				53.0874	0.0331319
				20	0.05	32.45	20	53.1252	-0.0298247	53.2114	-0.0213435				53.3803	-0.0132108				53.4826	-0.00512279				53.5225	0.0028729				53.5005	0.0107307				53.4176	0.0184082				53.2755	0.0258666				53.0756	0.0330714
				20	0.05	32.5	20	53.1118	-0.0298126	53.198	-0.0213425				53.3669	-0.0132203				53.4693	-0.00514245				53.5093	0.00284356				53.4875	0.0106923				53.405	0.0183616				53.2632	0.0258126				53.0637	0.0330111
				20	0.05	32.55	20	53.0984	-0.0298006	53.1847	-0.0213414				53.3535	-0.0132297				53.456	-0.005162				53.4962	0.00281436				53.4746	0.0106541				53.3924	0.0183151				53.2509	0.0257589				53.0518	0.0329511
				20	0.05	32.6	20	53.0851	-0.0297886	53.1713	-0.0213404				53.3402	-0.0132391				53.4428	-0.00518145				53.483	0.00278529				53.4617	0.0106161				53.3798	0.0182689				53.2387	0.0257053				53.04	0.0328913
				20	0.05	32.65	20	53.0718	-0.0297766	53.158	-0.0213393				53.3268	-0.0132484				53.4295	-0.0052008				53.4699	0.00275636				53.4488	0.0105782				53.3672	0.0182228				53.2264	0.025652				53.0282	0.0328317
				20	0.05	32.7	20	53.0585	-0.0297646	53.1447	-0.0213382				53.3135	-0.0132576				53.4162	-0.00522004				53.4568	0.00272756				53.4359	0.0105405				53.3546	0.018177				53.2142	0.0255989				53.0163	0.0327724
				20	0.05	32.75	20	53.0452	-0.0297526	53.1314	-0.0213371				53.3002	-0.0132668				53.403	-0.00523919				53.4437	0.0026989				53.4231	0.0105029				53.342	0.0181313				53.202	0.0255461				53.0045	0.0327133
				20	0.05	32.8	20	53.0319	-0.0297407	53.1181	-0.021336				53.2869	-0.0132759				53.3898	-0.00525823				53.4307	0.00267038				53.4102	0.0104656				53.3295	0.0180859				53.1897	0.0254934				52.9927	0.0326545
				20	0.05	32.85	20	53.0186	-0.0297287	53.1049	-0.0213348				53.2737	-0.0132849				53.3766	-0.00527718				53.4176	0.00264198				53.3974	0.0104283				53.3169	0.0180406				53.1776	0.0254409				52.9809	0.0325958
				20	0.05	32.9	20	53.0054	-0.0297168	53.0916	-0.0213336				53.2604	-0.0132939				53.3634	-0.00529603				53.4046	0.00261372				53.3846	0.0103913				53.3044	0.0179955				53.1654	0.0253887				52.9692	0.0325374
				20	0.05	32.95	20	52.9922	-0.0297049	53.0784	-0.0213324				53.2472	-0.0133028				53.3503	-0.00531478				53.3916	0.00258559				53.3718	0.0103544				53.2919	0.0179506				53.1532	0.0253367				52.9574	0.0324792
				20	0.05	33	20	52.979	-0.029693	53.0652	-0.0213311				53.234	-0.0133116				53.3371	-0.00533343				53.3786	0.00255759				53.359	0.0103177				53.2794	0.0179059				53.141	0.0252848				52.9456	0.0324212
				20	0.05	33.05	20	52.9658	-0.0296811	53.052	-0.0213299				53.2208	-0.0133204				53.324	-0.00535199				53.3656	0.00252972				53.3462	0.0102811				53.2669	0.0178613				53.1289	0.0252332				52.9339	0.0323635
				20	0.05	33.1	20	52.9526	-0.0296692	53.0388	-0.0213286				53.2076	-0.0133292				53.3109	-0.00537045				53.3526	0.00250198				53.3334	0.0102447				53.2544	0.017817				53.1167	0.0251818				52.9221	0.032306
				20	0.05	33.15	20	52.9395	-0.0296574	53.0257	-0.0213273				53.1944	-0.0133378				53.2978	-0.00538881				53.3396	0.00247437				53.3207	0.0102084				53.2419	0.0177728				53.1046	0.0251306				52.9104	0.0322487
				20	0.05	33.2	20	52.9264	-0.0296455	53.0125	-0.0213259				53.1813	-0.0133464				53.2847	-0.00540708				53.3267	0.00244689				53.308	0.0101723				53.2295	0.0177289				53.0925	0.0250796				52.8987	0.0321916
				20	0.05	33.25	20	52.9132	-0.0296337	52.9994	-0.0213246				53.1681	-0.013355				53.2716	-0.00542525				53.3138	0.00241953				53.2952	0.0101364				53.217	0.0176851				53.0804	0.0250288				52.887	0.0321347
				20	0.05	33.3	20	52.9001	-0.0296219	52.9863	-0.0213232				53.155	-0.0133635				53.2586	-0.00544333				53.3009	0.00239231				53.2825	0.0101006				53.2046	0.0176414				53.0683	0.0249782				52.8753	0.0320781
				20	0.05	33.35	20	52.887	-0.0296101	52.9732	-0.0213218				53.1419	-0.0133719				53.2455	-0.00546131				53.288	0.0023652				53.2698	0.010065				53.1922	0.017598				53.0562	0.0249278				52.8636	0.0320217
				20	0.05	33.4	20	52.874	-0.0295983	52.9601	-0.0213203				53.1288	-0.0133802				53.2325	-0.0054792				53.2751	0.00233823				53.2572	0.0100295				53.1798	0.0175547				53.0442	0.0248776				52.8519	0.0319654
				20	0.05	33.45	20	52.8609	-0.0295866	52.9471	-0.0213189				53.1157	-0.0133886				53.2195	-0.005497				53.2622	0.00231137				53.2445	0.00999415				53.1674	0.0175117				53.0321	0.0248276				52.8402	0.0319094
				20	0.05	33.5	20	52.8479	-0.0295748	52.934	-0.0213174				53.1027	-0.0133968				53.2065	-0.0055147				53.2493	0.00228465				53.2319	0.00995898				53.155	0.0174688				53.0201	0.0247778				52.8286	0.0318537
				20	0.05	33.55	20	52.8349	-0.0295631	52.921	-0.0213159				53.0897	-0.013405				53.1935	-0.00553231				53.2365	0.00225804				53.2192	0.00992396				53.1426	0.017426				53.008	0.0247282				52.8169	0.0317981
				20	0.05	33.6	20	52.8219	-0.0295514	52.908	-0.0213144				53.0766	-0.0134131				53.1806	-0.00554983				53.2237	0.00223156				53.2066	0.00988909				53.1303	0.0173835				52.996	0.0246787				52.8053	0.0317427
				20	0.05	33.65	20	52.8089	-0.0295397	52.895	-0.0213128				53.0636	-0.0134212				53.1676	-0.00556726				53.2109	0.0022052				53.194	0.00985437				53.118	0.0173411				52.984	0.0246295				52.7936	0.0316876
				20	0.05	33.7	20	52.7959	-0.029528	52.882	-0.0213112				53.0506	-0.0134292				53.1547	-0.0055846				53.1981	0.00217896				53.1814	0.0098198				53.1056	0.0172989				52.972	0.0245805				52.782	0.0316326
				20	0.05	33.75	20	52.783	-0.0295163	52.8691	-0.0213097				53.0377	-0.0134372				53.1418	-0.00560185				53.1853	0.00215284				53.1688	0.00978538				53.0933	0.0172569				52.96	0.0245317				52.7704	0.0315779
				20	0.05	33.8	20	52.77	-0.0295047	52.8561	-0.021308				53.0247	-0.0134451				53.1289	-0.00561901				53.1725	0.00212685				53.1563	0.0097511				53.081	0.017215				52.948	0.024483				52.7588	0.0315233
				20	0.05	33.85	20	52.7571	-0.029493	52.8432	-0.0213064				53.0118	-0.0134529				53.116	-0.00563608				53.1598	0.00210097				53.1437	0.00971698				53.0687	0.0171733				52.9361	0.0244346				52.7472	0.031469
				20	0.05	33.9	20	52.7442	-0.0294814	52.8303	-0.0213047				52.9988	-0.0134607				53.1031	-0.00565307				53.147	0.00207521				53.1312	0.009683				53.0564	0.0171318				52.9241	0.0243863				52.7356	0.0314149
				20	0.05	33.95	20	52.7313	-0.0294698	52.8174	-0.0213031				52.9859	-0.0134685				53.0903	-0.00566996				53.1343	0.00204957				53.1186	0.00964916				53.0442	0.0170904				52.9122	0.0243382				52.724	0.0313609
				20	0.05	34	20	52.7184	-0.0294582	52.8045	-0.0213014				52.973	-0.0134761				53.0774	-0.00568677				53.1216	0.00202404				53.1061	0.00961547				53.0319	0.0170493				52.9002	0.0242903				52.7125	0.0313072
				20	0.05	34.05	20	52.7056	-0.0294466	52.7916	-0.0212996				52.9601	-0.0134838				53.0646	-0.00570349				53.1089	0.00199863				53.0936	0.00958192				53.0197	0.0170082				52.8883	0.0242426				52.7009	0.0312537
				20	0.05	34.1	20	52.6927	-0.029435	52.7788	-0.0212979				52.9473	-0.0134913				53.0518	-0.00572012				53.0962	0.00197334				53.0812	0.00954852				53.0075	0.0169674				52.8764	0.0241951				52.6894	0.0312004
				20	0.05	34.15	20	52.6799	-0.0294234	52.7659	-0.0212961				52.9344	-0.0134989				53.039	-0.00573667				53.0836	0.00194817				53.0687	0.00951525				52.9953	0.0169267				52.8645	0.0241478				52.6778	0.0311472
				20	0.05	34.2	20	52.6671	-0.0294119	52.7531	-0.0212943				52.9216	-0.0135063				53.0262	-0.00575313				53.0709	0.00192311				53.0562	0.00948213				52.983	0.0168862				52.8526	0.0241006				52.6663	0.0310943
				20	0.05	34.25	20	52.6543	-0.0294004	52.7403	-0.0212925				52.9088	-0.0135137				53.0135	-0.00576951				53.0583	0.00189816				53.0438	0.00944915				52.9709	0.0168458				52.8407	0.0240536				52.6548	0.0310416
				20	0.05	34.3	20	52.6415	-0.0293888	52.7275	-0.0212907				52.896	-0.0135211				53.0007	-0.0057858				53.0457	0.00187333				53.0313	0.00941631				52.9587	0.0168056				52.8288	0.0240068				52.6433	0.030989
				20	0.05	34.35	20	52.6287	-0.0293773	52.7147	-0.0212888				52.8832	-0.0135284				52.988	-0.00580201				53.0331	0.00184861				53.0189	0.00938361				52.9465	0.0167656				52.817	0.0239602				52.6318	0.0309367
				20	0.05	34.4	20	52.616	-0.0293658	52.702	-0.021287				52.8704	-0.0135356				52.9753	-0.00581813				53.0205	0.00182401				53.0065	0.00935105				52.9344	0.0167257				52.8051	0.0239138				52.6203	0.0308845
				20	0.05	34.45	20	52.6032	-0.0293544	52.6892	-0.0212851				52.8576	-0.0135428				52.9626	-0.00583417				53.0079	0.00179951				52.9941	0.00931862				52.9222	0.016686				52.7933	0.0238676				52.6088	0.0308326
				20	0.05	34.5	20	52.5905	-0.0293429	52.6765	-0.0212832				52.8449	-0.01355				52.9499	-0.00585013				52.9953	0.00177513				52.9818	0.00928633				52.9101	0.0166465				52.7815	0.0238215				52.5974	0.0307808
				20	0.05	34.55	20	52.5778	-0.0293315	52.6638	-0.0212812				52.8322	-0.0135571				52.9372	-0.00586601				52.9828	0.00175086				52.9694	0.00925418				52.898	0.0166071				52.7697	0.0237756				52.5859	0.0307292
				20	0.05	34.6	20	52.5651	-0.02932	52.6511	-0.0212793				52.8195	-0.0135641				52.9245	-0.0058818				52.9702	0.00172669				52.957	0.00922217				52.8859	0.0165678				52.7579	0.0237299				52.5744	0.0306779
				20	0.05	34.65	20	52.5524	-0.0293086	52.6384	-0.0212773				52.8068	-0.0135711				52.9119	-0.00589751				52.9577	0.00170264				52.9447	0.00919028				52.8738	0.0165287				52.7461	0.0236843				52.563	0.0306267
				20	0.05	34.7	20	52.5398	-0.0292972	52.6257	-0.0212753				52.7941	-0.0135781				52.8993	-0.00591314				52.9452	0.0016787				52.9324	0.00915854				52.8617	0.0164898				52.7343	0.0236389				52.5516	0.0305756
				20	0.05	34.75	20	52.5271	-0.0292858	52.6131	-0.0212733				52.7814	-0.0135849				52.8867	-0.00592869				52.9327	0.00165486				52.9201	0.00912692				52.8496	0.0164511				52.7225	0.0235937				52.5402	0.0305248
				20	0.05	34.8	20	52.5145	-0.0292744	52.6004	-0.0212713				52.7687	-0.0135918				52.874	-0.00594416				52.9202	0.00163113				52.9078	0.00909544				52.8376	0.0164124				52.7108	0.0235487				52.5287	0.0304742
				20	0.05	34.85	20	52.5019	-0.029263	52.5878	-0.0212692				52.7561	-0.0135986				52.8615	-0.00595955				52.9077	0.00160751				52.8955	0.00906409				52.8255	0.016374				52.699	0.0235038				52.5173	0.0304237
				20	0.05	34.9	20	52.4893	-0.0292517	52.5752	-0.0212672				52.7435	-0.0136053				52.8489	-0.00597486				52.8953	0.001584				52.8832	0.00903287				52.8135	0.0163357				52.6873	0.0234592				52.5059	0.0303734
				20	0.05	34.95	20	52.4767	-0.0292403	52.5626	-0.0212651				52.7309	-0.013612				52.8363	-0.0059901				52.8828	0.00156059				52.8709	0.00900178				52.8015	0.0162975				52.6755	0.0234146				52.4946	0.0303234
				20	0.05	35	20	52.4641	-0.029229	52.55	-0.021263				52.7183	-0.0136186				52.8238	-0.00600525				52.8704	0.00153729				52.8587	0.00897082				52.7894	0.0162595				52.6638	0.0233703				52.4832	0.0302734
				20	0.05	35.05	20	52.4516	-0.0292177	52.5375	-0.0212608				52.7057	-0.0136252				52.8112	-0.00602033				52.858	0.00151409				52.8464	0.00894				52.7774	0.0162216				52.6521	0.0233261				52.4718	0.0302237
				20	0.05	35.1	20	52.439	-0.0292064	52.5249	-0.0212587				52.6931	-0.0136318				52.7987	-0.00603532				52.8456	0.001491				52.8342	0.00890929				52.7654	0.0161839				52.6404	0.0232821				52.4605	0.0301742
				20	0.05	35.15	20	52.4265	-0.0291951	52.5124	-0.0212565				52.6805	-0.0136382				52.7862	-0.00605025				52.8332	0.00146801				52.822	0.00887872				52.7535	0.0161464				52.6287	0.0232382				52.4491	0.0301248
				20	0.05	35.2	20	52.414	-0.0291838	52.4999	-0.0212543				52.668	-0.0136447				52.7737	-0.00606509				52.8208	0.00144512				52.8098	0.00884828				52.7415	0.016109				52.617	0.0231945				52.4378	0.0300756
				20	0.05	35.25	20	52.4015	-0.0291726	52.4873	-0.0212521				52.6555	-0.0136511				52.7612	-0.00607986				52.8084	0.00142234				52.7976	0.00881796				52.7296	0.0160717				52.6054	0.023151				52.4264	0.0300266
				20	0.05	35.3	20	52.389	-0.0291613	52.4748	-0.0212499				52.643	-0.0136574				52.7488	-0.00609455				52.7961	0.00139966				52.7854	0.00878776				52.7176	0.0160346				52.5937	0.0231077				52.4151	0.0299777
				20	0.05	35.35	20	52.3765	-0.0291501	52.4624	-0.0212477				52.6305	-0.0136637				52.7363	-0.00610917				52.7838	0.00137708				52.7733	0.00875769				52.7057	0.0159976				52.5821	0.0230645				52.4038	0.0299291
				20	0.05	35.4	20	52.364	-0.0291389	52.4499	-0.0212454				52.618	-0.01367				52.7239	-0.00612371				52.7714	0.0013546				52.7611	0.00872775				52.6938	0.0159608				52.5704	0.0230214				52.3925	0.0298806
				20	0.05	35.45	20	52.3516	-0.0291276	52.4374	-0.0212432				52.6055	-0.0136762				52.7115	-0.00613817				52.7591	0.00133222				52.749	0.00869793				52.6818	0.0159241				52.5588	0.0229785				52.3812	0.0298323
				20	0.05	35.5	20	52.3392	-0.0291164	52.425	-0.0212409				52.5931	-0.0136824				52.6991	-0.00615257				52.7468	0.00130994				52.7368	0.00866823				52.6699	0.0158875				52.5472	0.0229358				52.3699	0.0297841
				20	0.05	35.55	20	52.3268	-0.0291053	52.4126	-0.0212386				52.5806	-0.0136885				52.6867	-0.00616689				52.7345	0.00128776				52.7247	0.00863865				52.6581	0.0158511				52.5356	0.0228933				52.3586	0.0297361
				20	0.05	35.6	20	52.3144	-0.0290941	52.4002	-0.0212362				52.5682	-0.0136945				52.6743	-0.00618113				52.7223	0.00126568				52.7126	0.0086092				52.6462	0.0158149				52.524	0.0228509				52.3474	0.0296883
				20	0.05	35.65	20	52.302	-0.0290829	52.3878	-0.0212339				52.5558	-0.0137006				52.6619	-0.0061953				52.71	0.0012437				52.7005	0.00857987				52.6343	0.0157788				52.5124	0.0228086				52.3361	0.0296407
				20	0.05	35.7	20	52.2896	-0.0290718	52.3754	-0.0212315				52.5434	-0.0137065				52.6496	-0.0062094				52.6978	0.00122181				52.6885	0.00855065				52.6225	0.0157428				52.5008	0.0227665				52.3248	0.0295932
				20	0.05	35.75	20	52.2772	-0.0290606	52.363	-0.0212291				52.531	-0.0137125				52.6372	-0.00622343				52.6855	0.00120003				52.6764	0.00852156				52.6106	0.015707				52.4893	0.0227246				52.3136	0.0295459
				20	0.05	35.8	20	52.2649	-0.0290495	52.3507	-0.0212268				52.5186	-0.0137183				52.6249	-0.00623739				52.6733	0.00117833				52.6643	0.00849259				52.5988	0.0156713				52.4777	0.0226828				52.3024	0.0294988
				20	0.05	35.85	20	52.2526	-0.0290384	52.3383	-0.0212243				52.5062	-0.0137242				52.6126	-0.00625127				52.6611	0.00115674				52.6523	0.00846373				52.587	0.0156357				52.4662	0.0226412				52.2911	0.0294518
				20	0.05	35.9	20	52.2402	-0.0290273	52.326	-0.0212219				52.4939	-0.01373				52.6003	-0.00626508				52.6489	0.00113524				52.6403	0.00843499				52.5752	0.0156003				52.4546	0.0225997				52.2799	0.029405
				20	0.05	35.95	20	52.2279	-0.0290162	52.3137	-0.0212195				52.4816	-0.0137357				52.588	-0.00627883				52.6367	0.00111384				52.6282	0.00840637				52.5634	0.015565				52.4431	0.0225584				52.2687	0.0293584
				20	0.05	36	20	52.2156	-0.0290051	52.3014	-0.021217				52.4692	-0.0137414				52.5757	-0.0062925				52.6245	0.00109253				52.6162	0.00837787				52.5516	0.0155298				52.4316	0.0225172				52.2575	0.0293119
				20	0.05	36.05	20	52.2034	-0.0289941	52.2891	-0.0212145				52.4569	-0.0137471				52.5634	-0.0063061				52.6124	0.00107131				52.6042	0.00834948				52.5398	0.0154948				52.4201	0.0224762				52.2463	0.0292656
				20	0.05	36.1	20	52.1911	-0.028983	52.2768	-0.021212				52.4446	-0.0137527				52.5512	-0.00631963				52.6002	0.00105019				52.5923	0.00832121				52.528	0.0154599				52.4086	0.0224353				52.2352	0.0292194
				20	0.05	36.15	20	52.1789	-0.028972	52.2646	-0.0212095				52.4324	-0.0137583				52.539	-0.0063331				52.5881	0.00102916				52.5803	0.00829305				52.5163	0.0154252				52.3971	0.0223946				52.224	0.0291734
				20	0.05	36.2	20	52.1666	-0.028961	52.2523	-0.021207				52.4201	-0.0137638				52.5267	-0.00634649				52.576	0.00100823				52.5683	0.00826501				52.5045	0.0153906				52.3856	0.0223541				52.2128	0.0291276
				20	0.05	36.25	20	52.1544	-0.02895	52.2401	-0.0212044				52.4078	-0.0137693				52.5145	-0.00635982				52.5639	0.000987386				52.5564	0.00823708				52.4928	0.0153561				52.3742	0.0223136				52.2017	0.0290819
				20	0.05	36.3	20	52.1422	-0.028939	52.2279	-0.0212019				52.3956	-0.0137748				52.5023	-0.00637308				52.5518	0.000966634				52.5444	0.00820926				52.4811	0.0153217				52.3627	0.0222734				52.1905	0.0290364
				20	0.05	36.35	20	52.13	-0.028928	52.2157	-0.0211993				52.3834	-0.0137802				52.4901	-0.00638627				52.5397	0.000945974				52.5325	0.00818156				52.4694	0.0152875				52.3513	0.0222332				52.1794	0.0289911
				20	0.05	36.4	20	52.1178	-0.028917	52.2035	-0.0211967				52.3712	-0.0137855				52.478	-0.00639939				52.5276	0.000925404				52.5206	0.00815397				52.4577	0.0152534				52.3398	0.0221932				52.1683	0.0289459
				20	0.05	36.45	20	52.1056	-0.028906	52.1913	-0.0211941				52.359	-0.0137909				52.4658	-0.00641245				52.5156	0.000904924				52.5087	0.00812649				52.446	0.0152194				52.3284	0.0221534				52.1571	0.0289008
				20	0.05	36.5	20	52.0935	-0.0288951	52.1791	-0.0211915				52.3468	-0.0137961				52.4537	-0.00642544				52.5035	0.000884534				52.4968	0.00809911				52.4343	0.0151856				52.317	0.0221137				52.146	0.0288559
				20	0.05	36.55	20	52.0813	-0.0288841	52.167	-0.0211888				52.3346	-0.0138014				52.4415	-0.00643836				52.4915	0.000864232				52.4849	0.00807185				52.4226	0.0151519				52.3056	0.0220741				52.1349	0.0288112
				20	0.05	36.6	20	52.0692	-0.0288732	52.1548	-0.0211862				52.3224	-0.0138066				52.4294	-0.00645122				52.4795	0.00084402				52.4731	0.0080447				52.411	0.0151183				52.2942	0.0220347				52.1238	0.0287666
				20	0.05	36.65	20	52.0571	-0.0288623	52.1427	-0.0211835				52.3103	-0.0138117				52.4173	-0.00646401				52.4674	0.000823896				52.4612	0.00801766				52.3993	0.0150849				52.2828	0.0219955				52.1127	0.0287222
				20	0.05	36.7	20	52.045	-0.0288514	52.1306	-0.0211808				52.2981	-0.0138168				52.4052	-0.00647674				52.4554	0.00080386				52.4494	0.00799072				52.3877	0.0150515				52.2714	0.0219563				52.1017	0.0286779
				20	0.05	36.75	20	52.0329	-0.0288405	52.1185	-0.0211781				52.286	-0.0138219				52.3931	-0.00648941				52.4435	0.000783911				52.4375	0.0079639				52.3761	0.0150183				52.26	0.0219173				52.0906	0.0286338
				20	0.05	36.8	20	52.0208	-0.0288296	52.1064	-0.0211754				52.2739	-0.013827				52.381	-0.006502				52.4315	0.000764048				52.4257	0.00793718				52.3645	0.0149852				52.2487	0.0218785				52.0795	0.0285898
				20	0.05	36.85	20	52.0088	-0.0288187	52.0943	-0.0211726				52.2618	-0.013832				52.369	-0.00651454				52.4195	0.000744272				52.4139	0.00791056				52.3528	0.0149523				52.2373	0.0218398				52.0685	0.028546
				20	0.05	36.9	20	51.9967	-0.0288079	52.0822	-0.0211699				52.2497	-0.0138369				52.3569	-0.00652701				52.4076	0.000724582				52.4021	0.00788405				52.3413	0.0149195				52.226	0.0218012				52.0574	0.0285023
				20	0.05	36.95	20	51.9847	-0.028797	52.0702	-0.0211671				52.2377	-0.0138418				52.3449	-0.00653942				52.3956	0.000704977				52.3903	0.00785765				52.3297	0.0148868				52.2146	0.0217627				52.0464	0.0284588
				20	0.05	37	20	51.9726	-0.0287862	52.0582	-0.0211644				52.2256	-0.0138467				52.3329	-0.00655176				52.3837	0.000685458				52.3785	0.00783135				52.3181	0.0148542				52.2033	0.0217244				52.0354	0.0284154
				20	0.05	37.05	20	51.9606	-0.0287754	52.0461	-0.0211616				52.2136	-0.0138515				52.3209	-0.00656405				52.3718	0.000666022				52.3668	0.00780516				52.3065	0.0148217				52.192	0.0216863				52.0244	0.0283721
				20	0.05	37.1	20	51.9486	-0.0287646	52.0341	-0.0211588				52.2015	-0.0138563				52.3089	-0.00657627				52.3599	0.000646671				52.355	0.00777907				52.295	0.0147894				52.1807	0.0216482				52.0133	0.028329
				20	0.05	37.15	20	51.9366	-0.0287538	52.0221	-0.0211559				52.1895	-0.0138611				52.2969	-0.00658842				52.348	0.000627403				52.3433	0.00775309				52.2834	0.0147571				52.1694	0.0216103				52.0023	0.0282861
				20	0.05	37.2	20	51.9247	-0.028743	52.0101	-0.0211531				52.1775	-0.0138658				52.2849	-0.00660052				52.3361	0.000608219				52.3315	0.0077272				52.2719	0.014725				52.1581	0.0215726				51.9913	0.0282433
				20	0.05	37.25	20	51.9127	-0.0287322	51.9982	-0.0211503				52.1655	-0.0138705				52.2729	-0.00661256				52.3242	0.000589117				52.3198	0.00770142				52.2604	0.0146931				52.1468	0.0215349				51.9804	0.0282006
				20	0.05	37.3	20	51.9007	-0.0287214	51.9862	-0.0211474				52.1535	-0.0138751				52.261	-0.00662453				52.3124	0.000570097				52.3081	0.00767574				52.2489	0.0146612				52.1356	0.0214974				51.9694	0.0281581
				20	0.05	37.35	20	51.8888	-0.0287107	51.9742	-0.0211445				52.1415	-0.0138797				52.249	-0.00663644				52.3005	0.00055116				52.2964	0.00765016				52.2374	0.0146294				52.1243	0.0214601				51.9584	0.0281157
				20	0.05	37.4	20	51.8769	-0.0286999	51.9623	-0.0211416				52.1296	-0.0138843				52.2371	-0.0066483				52.2887	0.000532303				52.2847	0.00762468				52.2259	0.0145978				52.1131	0.0214228				51.9475	0.0280735
				20	0.05	37.45	20	51.865	-0.0286892	51.9504	-0.0211387				52.1176	-0.0138888				52.2252	-0.00666009				52.2769	0.000513528				52.273	0.0075993				52.2144	0.0145663				52.1018	0.0213857				51.9365	0.0280314
				20	0.05	37.5	20	51.8531	-0.0286785	51.9385	-0.0211358				52.1057	-0.0138933				52.2133	-0.00667183				52.2651	0.000494832				52.2614	0.00757402				52.2029	0.0145349				52.0906	0.0213487				51.9256	0.0279894
				20	0.05	37.55	20	51.8412	-0.0286678	51.9266	-0.0211329				52.0938	-0.0138978				52.2014	-0.0066835				52.2533	0.000476217				52.2497	0.00754884				52.1915	0.0145036				52.0794	0.0213119				51.9146	0.0279476
				20	0.05	37.6	20	51.8293	-0.0286571	51.9147	-0.0211299				52.0818	-0.0139022				52.1895	-0.00669512				52.2415	0.000457682				52.2381	0.00752376				52.18	0.0144724				52.0682	0.0212752				51.9037	0.0279059
				20	0.05	37.65	20	51.8174	-0.0286464	51.9028	-0.021127				52.0699	-0.0139066				52.1777	-0.00670667				52.2297	0.000439226				52.2264	0.00749877				52.1686	0.0144414				52.057	0.0212386				51.8928	0.0278644
				20	0.05	37.7	20	51.8056	-0.0286357	51.8909	-0.021124				52.0581	-0.013911				52.1658	-0.00671817				52.2179	0.000420848				52.2148	0.00747388				52.1571	0.0144104				52.0458	0.0212021				51.8819	0.027823
				20	0.05	37.75	20	51.7937	-0.028625	51.8791	-0.021121				52.0462	-0.0139153				52.154	-0.00672961				52.2062	0.000402549				52.2032	0.00744909				52.1457	0.0143796				52.0346	0.0211658				51.871	0.0277817
				20	0.05	37.8	20	51.7819	-0.0286144	51.8672	-0.021118				52.0343	-0.0139195				52.1421	-0.006741				52.1944	0.000384328				52.1916	0.0074244				52.1343	0.0143489				52.0234	0.0211295				51.8601	0.0277406
				20	0.05	37.85	20	51.7701	-0.0286037	51.8554	-0.021115				52.0225	-0.0139238				52.1303	-0.00675232				52.1827	0.000366184				52.18	0.0073998				52.1229	0.0143183				52.0122	0.0210934				51.8492	0.0276996
				20	0.05	37.9	20	51.7583	-0.0285931	51.8436	-0.021112				52.0106	-0.013928				52.1185	-0.00676359				52.171	0.000348118				52.1684	0.00737529				52.1115	0.0142878				52.0011	0.0210575				51.8383	0.0276587
				20	0.05	37.95	20	51.7465	-0.0285825	51.8318	-0.0211089				51.9988	-0.0139322				52.1067	-0.0067748				52.1593	0.000330128				52.1569	0.00735089				52.1001	0.0142574				51.9899	0.0210216				51.8274	0.027618
				20	0.05	38	20	51.7347	-0.0285719	51.82	-0.0211059				51.987	-0.0139363				52.0949	-0.00678596				52.1476	0.000312214				52.1453	0.00732657				52.0887	0.0142271				51.9788	0.0209859				51.8166	0.0275774
				20	0.05	38.05	20	51.723	-0.0285613	51.8082	-0.0211028				51.9752	-0.0139404				52.0832	-0.00679706				52.1359	0.000294376				52.1337	0.00730235				52.0774	0.0141969				51.9677	0.0209503				51.8057	0.0275369
				20	0.05	38.1	20	51.7112	-0.0285507	51.7965	-0.0210997				51.9634	-0.0139445				52.0714	-0.0068081				52.1242	0.000276614				52.1222	0.00727822				52.066	0.0141669				51.9566	0.0209148				51.7949	0.0274966
				20	0.05	38.15	20	51.6995	-0.0285401	51.7847	-0.0210967				51.9516	-0.0139485				52.0597	-0.00681909				52.1125	0.000258926				52.1107	0.00725418				52.0547	0.0141369				51.9454	0.0208795				51.784	0.0274564
				20	0.05	38.2	20	51.6877	-0.0285295	51.773	-0.0210936				51.9398	-0.0139525				52.0479	-0.00683003				52.1009	0.000241314				52.0992	0.00723024				52.0434	0.0141071				51.9343	0.0208442				51.7732	0.0274163
				20	0.05	38.25	20	51.676	-0.028519	51.7612	-0.0210904				51.9281	-0.0139564				52.0362	-0.0068409				52.0893	0.000223775				52.0877	0.00720639				52.032	0.0140774				51.9232	0.0208091				51.7624	0.0273764
				20	0.05	38.3	20	51.6643	-0.0285084	51.7495	-0.0210873				51.9163	-0.0139604				52.0245	-0.00685173				52.0776	0.00020631				52.0762	0.00718263				52.0207	0.0140477				51.9122	0.0207741				51.7516	0.0273366
				20	0.05	38.35	20	51.6526	-0.0284979	51.7378	-0.0210842				51.9046	-0.0139643				52.0128	-0.0068625				52.066	0.000188919				52.0647	0.00715896				52.0094	0.0140182				51.9011	0.0207392				51.7407	0.0272969
				20	0.05	38.4	20	51.6409	-0.0284873	51.7261	-0.021081				51.8929	-0.0139681				52.0011	-0.00687321				52.0544	0.000171601				52.0532	0.00713538				51.9981	0.0139888				51.89	0.0207044				51.7299	0.0272573
				20	0.05	38.45	20	51.6292	-0.0284768	51.7144	-0.0210779				51.8812	-0.013972				51.9894	-0.00688388				52.0428	0.000154355				52.0417	0.00711189				51.9868	0.0139595				51.879	0.0206698				51.7192	0.0272179
				20	0.05	38.5	20	51.6176	-0.0284663	51.7027	-0.0210747				51.8695	-0.0139757				51.9777	-0.00689448				52.0312	0.000137182				52.0303	0.00708849				51.9756	0.0139303				51.8679	0.0206353				51.7084	0.0271786
				20	0.05	38.55	20	51.6059	-0.0284558	51.6911	-0.0210715				51.8578	-0.0139795				51.9661	-0.00690504				52.0196	0.000120081				52.0188	0.00706518				51.9643	0.0139012				51.8569	0.0206009				51.6976	0.0271394
				20	0.05	38.6	20	51.5943	-0.0284453	51.6794	-0.0210683				51.8461	-0.0139832				51.9544	-0.00691554				52.0081	0.000103051				52.0074	0.00704196				51.953	0.0138722				51.8458	0.0205665				51.6868	0.0271003
				20	0.05	38.65	20	51.5827	-0.0284349	51.6678	-0.0210651				51.8344	-0.0139869				51.9428	-0.00692599				51.9965	8.6092e-05				51.996	0.00701882				51.9418	0.0138433				51.8348	0.0205324				51.6761	0.0270614
				20	0.05	38.7	20	51.5711	-0.0284244	51.6562	-0.0210619				51.8228	-0.0139906				51.9312	-0.00693639				51.985	6.92038e-05				51.9845	0.00699577				51.9305	0.0138145				51.8238	0.0204983				51.6653	0.0270226
				20	0.05	38.75	20	51.5594	-0.0284139	51.6445	-0.0210586				51.8111	-0.0139942				51.9195	-0.00694674				51.9734	5.23861e-05				51.9731	0.00697281				51.9193	0.0137858				51.8128	0.0204643				51.6546	0.0269839
				20	0.05	38.8	20	51.5479	-0.0284035	51.6329	-0.0210554				51.7995	-0.0139978				51.9079	-0.00695703				51.9619	3.56382e-05				51.9617	0.00694994				51.9081	0.0137572				51.8018	0.0204305				51.6438	0.0269453
				20	0.05	38.85	20	51.5363	-0.0283931	51.6213	-0.0210521				51.7879	-0.0140014				51.8963	-0.00696727				51.9504	1.896e-05				51.9504	0.00692715				51.8969	0.0137287				51.7908	0.0203967				51.6331	0.0269068
				20	0.05	38.9	20	51.5247	-0.0283826	51.6098	-0.0210489				51.7763	-0.0140049				51.8848	-0.00697747				51.9389	2.35099e-06				51.939	0.00690445				51.8857	0.0137003				51.7798	0.0203631				51.6224	0.0268685
				20	0.05	38.95	20	51.5131	-0.0283722	51.5982	-0.0210456				51.7647	-0.0140084				51.8732	-0.00698761				51.9274	-1.41892e-05				51.9276	0.00688183				51.8745	0.013672				51.7688	0.0203296				51.6117	0.0268303
				20	0.05	39	20	51.5016	-0.0283618	51.5866	-0.0210423				51.7531	-0.0140119				51.8616	-0.0069977				51.9159	-3.06609e-05				51.9163	0.0068593				51.8633	0.0136438				51.7579	0.0202962				51.601	0.0267922
				20	0.05	39.05	20	51.4901	-0.0283514	51.5751	-0.021039				51.7415	-0.0140154				51.8501	-0.00700774				51.9044	-4.70645e-05				51.9049	0.00683685				51.8521	0.0136157				51.7469	0.0202629				51.5903	0.0267543
				20	0.05	39.1	20	51.4785	-0.0283411	51.5635	-0.0210357				51.73	-0.0140188				51.8385	-0.00701773				51.893	-6.34003e-05				51.8936	0.00681448				51.841	0.0135877				51.736	0.0202297				51.5796	0.0267164
				20	0.05	39.15	20	51.467	-0.0283307	51.552	-0.0210324				51.7184	-0.0140221				51.827	-0.00702767				51.8815	-7.96688e-05				51.8823	0.0067922				51.8298	0.0135598				51.725	0.0201967				51.5689	0.0266787
				20	0.05	39.2	20	51.4555	-0.0283203	51.5405	-0.021029				51.7069	-0.0140255				51.8155	-0.00703756				51.8701	-9.58703e-05				51.8709	0.00677001				51.8187	0.013532				51.7141	0.0201637				51.5582	0.0266411
				20	0.05	39.25	20	51.444	-0.02831	51.529	-0.0210257				51.6953	-0.0140288				51.804	-0.0070474				51.8586	-0.000112005				51.8596	0.00674789				51.8076	0.0135042				51.7032	0.0201308				51.5475	0.0266036
				20	0.05	39.3	20	51.4325	-0.0282996	51.5175	-0.0210223				51.6838	-0.0140321				51.7925	-0.0070572				51.8472	-0.000128074				51.8483	0.00672586				51.7964	0.0134766				51.6923	0.0200981				51.5369	0.0265662
				20	0.05	39.35	20	51.4211	-0.0282893	51.506	-0.021019				51.6723	-0.0140354				51.781	-0.00706694				51.8358	-0.000144076				51.8371	0.0067039				51.7853	0.0134491				51.6814	0.0200655				51.5262	0.0265289
				20	0.05	39.4	20	51.4096	-0.028279	51.4945	-0.0210156				51.6608	-0.0140386				51.7695	-0.00707664				51.8244	-0.000160013				51.8258	0.00668203				51.7742	0.0134217				51.6705	0.0200329				51.5156	0.0264918
				20	0.05	39.45	20	51.3982	-0.0282687	51.4831	-0.0210122				51.6493	-0.0140418				51.7581	-0.00708629				51.813	-0.000175885				51.8145	0.00666024				51.7631	0.0133944				51.6596	0.0200005				51.505	0.0264547
				20	0.05	39.5	20	51.3867	-0.0282584	51.4716	-0.0210088				51.6378	-0.014045				51.7466	-0.00709589				51.8017	-0.000191692				51.8033	0.00663853				51.752	0.0133671				51.6487	0.0199682				51.4943	0.0264178
				20	0.05	39.55	20	51.3753	-0.0282481	51.4602	-0.0210054				51.6264	-0.0140481				51.7352	-0.00710544				51.7903	-0.000207434				51.792	0.0066169				51.7409	0.01334				51.6378	0.0199359				51.4837	0.026381
				20	0.05	39.6	20	51.3639	-0.0282378	51.4488	-0.021002				51.6149	-0.0140512				51.7238	-0.00711494				51.7789	-0.000223112				51.7808	0.00659535				51.7299	0.0133129				51.627	0.0199038				51.4731	0.0263443
				20	0.05	39.65	20	51.3525	-0.0282275	51.4373	-0.0209986				51.6035	-0.0140543				51.7123	-0.0071244				51.7676	-0.000238726				51.7695	0.00657388				51.7188	0.013286				51.6161	0.0198718				51.4625	0.0263077
				20	0.05	39.7	20	51.3411	-0.0282172	51.4259	-0.0209951				51.592	-0.0140574				51.7009	-0.00713381				51.7562	-0.000254277				51.7583	0.00655249				51.7077	0.0132591				51.6053	0.0198399				51.4519	0.0262712
				20	0.05	39.75	20	51.3297	-0.028207	51.4145	-0.0209917				51.5806	-0.0140604				51.6895	-0.00714318				51.7449	-0.000269764				51.7471	0.00653117				51.6967	0.0132323				51.5944	0.0198081				51.4413	0.0262348
				20	0.05	39.8	20	51.3183	-0.0281967	51.4032	-0.0209882				51.5692	-0.0140634				51.6781	-0.0071525				51.7336	-0.000285189				51.7359	0.00650994				51.6857	0.0132056				51.5836	0.0197764				51.4307	0.0261986
				20	0.05	39.85	20	51.307	-0.0281865	51.3918	-0.0209847				51.5578	-0.0140663				51.6668	-0.00716177				51.7223	-0.000300551				51.7247	0.00648878				51.6746	0.013179				51.5728	0.0197448				51.4201	0.0261624
				20	0.05	39.9	20	51.2956	-0.0281763	51.3804	-0.0209813				51.5464	-0.0140693				51.6554	-0.007171				51.711	-0.000315851				51.7136	0.00646769				51.6636	0.0131525				51.562	0.0197133				51.4096	0.0261264
				20	0.05	39.95	20	51.2843	-0.0281661	51.3691	-0.0209778				51.535	-0.0140722				51.644	-0.00718018				51.6997	-0.000331089				51.7024	0.00644669				51.6526	0.0131261				51.5512	0.0196818				51.399	0.0260905
				20	0.05	40	20	51.273	-0.0281559	51.3577	-0.0209743				51.5237	-0.0140751				51.6327	-0.00718932				51.6884	-0.000346266				51.6912	0.00642576				51.6416	0.0130998				51.5404	0.0196505				51.3884	0.0260546
				20	0.05	40.05	20	51.2617	-0.0281457	51.3464	-0.0209708				51.5123	-0.0140779				51.6213	-0.00719841				51.6772	-0.000361382				51.6801	0.0064049				51.6306	0.0130736				51.5296	0.0196193				51.3779	0.0260189
				20	0.05	40.1	20	51.2503	-0.0281355	51.3351	-0.0209673				51.5009	-0.0140808				51.61	-0.00720745				51.6659	-0.000376436				51.6689	0.00638413				51.6196	0.0130474				51.5188	0.0195882				51.3674	0.0259833
				20	0.05	40.15	20	51.239	-0.0281253	51.3238	-0.0209637				51.4896	-0.0140836				51.5987	-0.00721646				51.6546	-0.000391431				51.6578	0.00636342				51.6087	0.0130213				51.508	0.0195572				51.3568	0.0259478
				20	0.05	40.2	20	51.2278	-0.0281151	51.3125	-0.0209602				51.4783	-0.0140863				51.5874	-0.00722541				51.6434	-0.000406364				51.6467	0.00634279				51.5977	0.0129954				51.4973	0.0195263				51.3463	0.0259124
				20	0.05	40.25	20	51.2165	-0.028105	51.3012	-0.0209567				51.467	-0.0140891				51.5761	-0.00723433				51.6322	-0.000421239				51.6356	0.00632224				51.5868	0.0129695				51.4865	0.0194955				51.3358	0.0258771
				20	0.05	40.3	20	51.2052	-0.0280948	51.2899	-0.0209531				51.4557	-0.0140918				51.5648	-0.0072432				51.621	-0.000436053				51.6245	0.00630176				51.5758	0.0129437				51.4758	0.0194648				51.3253	0.025842
				20	0.05	40.35	20	51.194	-0.0280847	51.2786	-0.0209495				51.4444	-0.0140945				51.5535	-0.00725202				51.6098	-0.000450808				51.6134	0.00628135				51.5649	0.012918				51.465	0.0194341				51.3148	0.0258069
				20	0.05	40.4	20	51.1827	-0.0280746	51.2674	-0.020946				51.4331	-0.0140972				51.5423	-0.00726081				51.5986	-0.000465505				51.6023	0.00626102				51.5539	0.0128923				51.4543	0.0194036				51.3043	0.0257719
				20	0.05	40.45	20	51.1715	-0.0280645	51.2561	-0.0209424				51.4218	-0.0140998				51.531	-0.00726955				51.5874	-0.000480142				51.5912	0.00624076				51.543	0.0128668				51.4436	0.0193732				51.2938	0.025737
				20	0.05	40.5	20	51.1603	-0.0280543	51.2449	-0.0209388				51.4105	-0.0141024				51.5198	-0.00727825				51.5762	-0.000494722				51.5801	0.00622057				51.5321	0.0128413				51.4329	0.0193428				51.2833	0.0257022
				20	0.05	40.55	20	51.1491	-0.0280442	51.2336	-0.0209352				51.3993	-0.014105				51.5085	-0.0072869				51.565	-0.000509243				51.5691	0.00620045				51.5212	0.0128159				51.4222	0.0193126				51.2728	0.0256676
				20	0.05	40.6	20	51.1378	-0.0280341	51.2224	-0.0209316				51.388	-0.0141076				51.4973	-0.00729551				51.5539	-0.000523707				51.558	0.0061804				51.5103	0.0127907				51.4115	0.0192824				51.2624	0.025633
				20	0.05	40.65	20	51.1267	-0.0280241	51.2112	-0.020928				51.3768	-0.0141101				51.4861	-0.00730408				51.5427	-0.000538114				51.547	0.00616043				51.4994	0.0127654				51.4008	0.0192524				51.2519	0.0255985
				20	0.05	40.7	20	51.1155	-0.028014	51.2	-0.0209243				51.3656	-0.0141126				51.4749	-0.00731261				51.5316	-0.000552463				51.536	0.00614052				51.4886	0.0127403				51.3901	0.0192224				51.2415	0.0255642
				20	0.05	40.75	20	51.1043	-0.0280039	51.1888	-0.0209207				51.3543	-0.0141151				51.4637	-0.0073211				51.5204	-0.000566755				51.5249	0.00612069				51.4777	0.0127153				51.3794	0.0191926				51.231	0.0255299
				20	0.05	40.8	20	51.0931	-0.0279939	51.1777	-0.0209171				51.3431	-0.0141176				51.4525	-0.00732954				51.5093	-0.000580992				51.5139	0.00610093				51.4668	0.0126903				51.3687	0.0191628				51.2206	0.0254957
				20	0.05	40.85	20	51.082	-0.0279838	51.1665	-0.0209134				51.3319	-0.01412				51.4413	-0.00733794				51.4982	-0.000595172				51.5029	0.00608123				51.456	0.0126654				51.3581	0.0191331				51.2101	0.0254617
				20	0.05	40.9	20	51.0708	-0.0279738	51.1553	-0.0209097				51.3208	-0.0141224				51.4301	-0.00734631				51.4871	-0.000609296				51.4919	0.00606161				51.4451	0.0126406				51.3474	0.0191035				51.1997	0.0254277
				20	0.05	40.95	20	51.0597	-0.0279638	51.1442	-0.0209061				51.3096	-0.0141248				51.419	-0.00735463				51.476	-0.000623364				51.4809	0.00604205				51.4343	0.0126159				51.3368	0.019074				51.1893	0.0253938
				20	0.05	41	20	51.0486	-0.0279537	51.1331	-0.0209024				51.2984	-0.0141272				51.4078	-0.00736291				51.4649	-0.000637378				51.47	0.00602257				51.4235	0.0125913				51.3262	0.0190446				51.1789	0.02536
				20	0.05	41.05	20	51.0375	-0.0279437	51.1219	-0.0208987				51.2873	-0.0141295				51.3967	-0.00737115				51.4538	-0.000651336				51.459	0.00600315				51.4127	0.0125667				51.3155	0.0190152				51.1685	0.0253264
				20	0.05	41.1	20	51.0264	-0.0279337	51.1108	-0.020895				51.2761	-0.0141318				51.3856	-0.00737935				51.4428	-0.00066524				51.448	0.0059838				51.4018	0.0125422				51.3049	0.018986				51.1581	0.0252928
				20	0.05	41.15	20	51.0153	-0.0279237	51.0997	-0.0208913				51.265	-0.0141341				51.3744	-0.00738751				51.4317	-0.000679089				51.4371	0.00596451				51.391	0.0125178				51.2943	0.0189568				51.1477	0.0252593
				20	0.05	41.2	20	51.0042	-0.0279138	51.0886	-0.0208876				51.2538	-0.0141364				51.3633	-0.00739564				51.4207	-0.000692884				51.4261	0.0059453				51.3803	0.0124935				51.2837	0.0189278				51.1373	0.0252259
				20	0.05	41.25	20	50.9931	-0.0279038	51.0775	-0.0208839				51.2427	-0.0141386				51.3522	-0.00740372				51.4096	-0.000706626				51.4152	0.00592615				51.3695	0.0124693				51.2731	0.0188988				51.127	0.0251926
				20	0.05	41.3	20	50.9821	-0.0278938	51.0664	-0.0208802				51.2316	-0.0141408				51.3411	-0.00741176				51.3986	-0.000720314				51.4043	0.00590707				51.3587	0.0124451				51.2625	0.0188699				51.1166	0.0251594
				20	0.05	41.35	20	50.971	-0.0278839	51.0554	-0.0208764				51.2205	-0.014143				51.3301	-0.00741976				51.3876	-0.000733948				51.3934	0.00588805				51.3479	0.012421				51.2519	0.0188411				51.1062	0.0251263
				20	0.05	41.4	20	50.96	-0.0278739	51.0443	-0.0208727				51.2094	-0.0141452				51.319	-0.00742773				51.3766	-0.00074753				51.3825	0.0058691				51.3372	0.012397				51.2413	0.0188124				51.0959	0.0250933
				20	0.05	41.45	20	50.9489	-0.027864	51.0333	-0.0208689				51.1984	-0.0141473				51.3079	-0.00743565				51.3656	-0.000761059				51.3716	0.00585021				51.3264	0.012373				51.2308	0.0187838				51.0855	0.0250604
				20	0.05	41.5	20	50.9379	-0.027854	51.0222	-0.0208652				51.1873	-0.0141494				51.2969	-0.00744354				51.3546	-0.000774536				51.3607	0.00583139				51.3157	0.0123492				51.2202	0.0187552				51.0752	0.0250275
				20	0.05	41.55	20	50.9269	-0.0278441	51.0112	-0.0208614				51.1762	-0.0141515				51.2858	-0.00745139				51.3436	-0.00078796				51.3498	0.00581264				51.3049	0.0123254				51.2097	0.0187268				51.0649	0.0249948
				20	0.05	41.6	20	50.9159	-0.0278342	51.0002	-0.0208576				51.1652	-0.0141536				51.2748	-0.0074592				51.3326	-0.000801333				51.3389	0.00579394				51.2942	0.0123017				51.1991	0.0186984				51.0546	0.0249621
				20	0.05	41.65	20	50.9049	-0.0278243	50.9892	-0.0208539				51.1541	-0.0141557				51.2638	-0.00746698				51.3217	-0.000814654				51.3281	0.00577532				51.2835	0.0122781				51.1886	0.0186701				51.0442	0.0249296
				20	0.05	41.7	20	50.8939	-0.0278144	50.9782	-0.0208501				51.1431	-0.0141577				51.2528	-0.00747471				51.3107	-0.000827924				51.3172	0.00575675				51.2728	0.0122545				51.1781	0.0186419				51.0339	0.0248971
				20	0.05	41.75	20	50.8829	-0.0278045	50.9672	-0.0208463				51.1321	-0.0141597				51.2418	-0.00748241				51.2998	-0.000841143				51.3064	0.00573825				51.2621	0.012231				51.1676	0.0186138				51.0236	0.0248648
				20	0.05	41.8	20	50.872	-0.0277947	50.9562	-0.0208425				51.1211	-0.0141617				51.2308	-0.00749008				51.2888	-0.000854311				51.2956	0.00571982				51.2514	0.0122076				51.157	0.0185857				51.0133	0.0248325
				20	0.05	41.85	20	50.861	-0.0277848	50.9452	-0.0208387				51.1101	-0.0141636				51.2198	-0.0074977				51.2779	-0.000867428				51.2847	0.00570144				51.2407	0.0121843				51.1465	0.0185578				51.003	0.0248003
				20	0.05	41.9	20	50.8501	-0.0277749	50.9343	-0.0208348				51.0991	-0.0141656				51.2088	-0.00750529				51.267	-0.000880496				51.2739	0.00568313				51.23	0.012161				51.136	0.0185299				50.9928	0.0247682
				20	0.05	41.95	20	50.8391	-0.0277651	50.9233	-0.020831				51.0881	-0.0141675				51.1978	-0.00751284				51.2561	-0.000893513				51.2631	0.00566488				51.2194	0.0121378				51.1256	0.0185021				50.9825	0.0247362
				20	0.05	42	20	50.8282	-0.0277552	50.9124	-0.0208272				51.0771	-0.0141694				51.1869	-0.00752036				51.2452	-0.000906481				51.2523	0.00564669				51.2087	0.0121147				51.1151	0.0184744				50.9722	0.0247042
				20	0.05	42.05	20	50.8173	-0.0277454	50.9014	-0.0208233				51.0662	-0.0141712				51.1759	-0.00752783				51.2343	-0.0009194				51.2415	0.00562856				51.1981	0.0120916				51.1046	0.0184468				50.962	0.0246724
				20	0.05	42.1	20	50.8064	-0.0277356	50.8905	-0.0208195				51.0552	-0.0141731				51.165	-0.00753528				51.2234	-0.000932269				51.2307	0.0056105				51.1874	0.0120687				51.0941	0.0184192				50.9517	0.0246406
				20	0.05	42.15	20	50.7955	-0.0277258	50.8796	-0.0208156				51.0443	-0.0141749				51.1541	-0.00754269				51.2125	-0.000945089				51.2199	0.00559249				51.1768	0.0120458				51.0837	0.0183917				50.9415	0.024609
				20	0.05	42.2	20	50.7846	-0.0277159	50.8687	-0.0208118				51.0333	-0.0141767				51.1431	-0.00755006				51.2017	-0.000957861				51.2092	0.00557455				51.1662	0.0120229				51.0732	0.0183643				50.9312	0.0245774
				20	0.05	42.25	20	50.7737	-0.0277061	50.8578	-0.0208079				51.0224	-0.0141785				51.1322	-0.00755739				51.1908	-0.000970585				51.1984	0.00555667				51.1555	0.0120002				51.0628	0.018337				50.921	0.0245459
				20	0.05	42.3	20	50.7629	-0.0276964	50.8469	-0.020804				51.0115	-0.0141803				51.1213	-0.0075647				51.18	-0.00098326				51.1877	0.00553884				51.1449	0.0119775				51.0523	0.0183098				50.9108	0.0245145
				20	0.05	42.35	20	50.752	-0.0276866	50.836	-0.0208002				51.0006	-0.014182				51.1104	-0.00757196				51.1691	-0.000995887				51.1769	0.00552108				51.1343	0.0119548				51.0419	0.0182826				50.9005	0.0244832
				20	0.05	42.4	20	50.7411	-0.0276768	50.8252	-0.0207963				50.9897	-0.0141837				51.0995	-0.00757919				51.1583	-0.00100847				51.1662	0.00550337				51.1237	0.0119323				51.0315	0.0182556				50.8903	0.0244519
				20	0.05	42.45	20	50.7303	-0.027667	50.8143	-0.0207924				50.9788	-0.0141854				51.0887	-0.00758639				51.1475	-0.001021				51.1555	0.00548572				51.1131	0.0119098				51.0211	0.0182286				50.8801	0.0244208
				20	0.05	42.5	20	50.7195	-0.0276573	50.8035	-0.0207885				50.9679	-0.0141871				51.0778	-0.00759355				51.1367	-0.00103349				51.1448	0.00546814				51.1026	0.0118874				51.0107	0.0182016				50.8699	0.0243897
				20	0.05	42.55	20	50.7086	-0.0276475	50.7926	-0.0207846				50.9571	-0.0141888				51.0669	-0.00760068				51.1259	-0.00104592				51.1341	0.00545061				51.092	0.011865				51.0003	0.0181748				50.8597	0.0243587
				20	0.05	42.6	20	50.6978	-0.0276378	50.7818	-0.0207807				50.9462	-0.0141904				51.0561	-0.00760778				51.1151	-0.00105832				51.1234	0.00543313				51.0814	0.0118428				50.9899	0.018148				50.8495	0.0243278
				20	0.05	42.65	20	50.687	-0.027628	50.771	-0.0207767				50.9353	-0.014192				51.0453	-0.00761484				51.1043	-0.00107066				51.1127	0.00541572				51.0709	0.0118205				50.9795	0.0181213				50.8394	0.024297
				20	0.05	42.7	20	50.6762	-0.0276183	50.7602	-0.0207728				50.9245	-0.0141936				51.0344	-0.00762186				51.0935	-0.00108296				51.102	0.00539836				51.0603	0.0117984				50.9691	0.0180947				50.8292	0.0242663
				20	0.05	42.75	20	50.6654	-0.0276086	50.7494	-0.0207689				50.9137	-0.0141952				51.0236	-0.00762886				51.0827	-0.00109521				51.0913	0.00538106				51.0498	0.0117763				50.9588	0.0180682				50.819	0.0242356
				20	0.05	42.8	20	50.6547	-0.0275989	50.7386	-0.0207649				50.9028	-0.0141968				51.0128	-0.00763582				51.072	-0.00110742				51.0807	0.00536382				51.0392	0.0117543				50.9484	0.0180417				50.8089	0.024205
				20	0.05	42.85	20	50.6439	-0.0275892	50.7278	-0.020761				50.892	-0.0141983				51.002	-0.00764274				51.0612	-0.00111958				51.07	0.00534664				51.0287	0.0117324				50.938	0.0180153				50.7987	0.0241745
				20	0.05	42.9	20	50.6331	-0.0275795	50.717	-0.020757				50.8812	-0.0141998				50.9912	-0.00764964				51.0505	-0.0011317				51.0593	0.00532951				51.0182	0.0117105				50.9277	0.017989				50.7886	0.0241441
				20	0.05	42.95	20	50.6224	-0.0275698	50.7062	-0.0207531				50.8704	-0.0142013				50.9804	-0.0076565				51.0398	-0.00114377				51.0487	0.00531243				51.0077	0.0116887				50.9173	0.0179627				50.7784	0.0241138
				20	0.05	43	20	50.6116	-0.0275601	50.6955	-0.0207491				50.8596	-0.0142028				50.9696	-0.00766333				51.029	-0.0011558				51.0381	0.00529541				50.9972	0.0116669				50.907	0.0179365				50.7683	0.0240835
				20	0.05	43.05	20	50.6009	-0.0275505	50.6847	-0.0207451				50.8489	-0.0142043				50.9589	-0.00767013				51.0183	-0.00116779				51.0274	0.00527845				50.9867	0.0116452				50.8967	0.0179104				50.7582	0.0240534
				20	0.05	43.1	20	50.5902	-0.0275408	50.674	-0.0207412				50.8381	-0.0142057				50.9481	-0.00767689				51.0076	-0.00117973				51.0168	0.00526154				50.9762	0.0116236				50.8864	0.0178844				50.7481	0.0240233
				20	0.05	43.15	20	50.5795	-0.0275312	50.6633	-0.0207372				50.8273	-0.0142071				50.9374	-0.00768362				50.9969	-0.00119162				51.0062	0.00524469				50.9657	0.0116021				50.8761	0.0178585				50.738	0.0239932
				20	0.05	43.2	20	50.5688	-0.0275215	50.6525	-0.0207332				50.8166	-0.0142085				50.9266	-0.00769032				50.9862	-0.00120347				50.9956	0.00522789				50.9553	0.0115806				50.8658	0.0178326				50.7279	0.0239633
				20	0.05	43.25	20	50.5581	-0.0275119	50.6418	-0.0207292				50.8058	-0.0142099				50.9159	-0.00769699				50.9755	-0.00121528				50.985	0.00521115				50.9448	0.0115592				50.8555	0.0178068				50.7178	0.0239334
				20	0.05	43.3	20	50.5474	-0.0275023	50.6311	-0.0207252				50.7951	-0.0142113				50.9052	-0.00770363				50.9649	-0.00122705				50.9745	0.00519446				50.9344	0.0115378				50.8452	0.017781				50.7077	0.0239037
				20	0.05	43.35	20	50.5367	-0.0274926	50.6204	-0.0207212				50.7844	-0.0142126				50.8944	-0.00771023				50.9542	-0.00123877				50.9639	0.00517782				50.9239	0.0115165				50.8349	0.0177554				50.6976	0.0238739
				20	0.05	43.4	20	50.526	-0.027483	50.6098	-0.0207172				50.7736	-0.0142139				50.8837	-0.00771681				50.9435	-0.00125045				50.9533	0.00516124				50.9135	0.0114953				50.8246	0.0177298				50.6875	0.0238443
				20	0.05	43.45	20	50.5154	-0.0274734	50.5991	-0.0207132				50.7629	-0.0142152				50.873	-0.00772335				50.9329	-0.00126208				50.9428	0.00514471				50.903	0.0114741				50.8143	0.0177042				50.6774	0.0238148
				20	0.05	43.5	20	50.5047	-0.0274638	50.5884	-0.0207091				50.7522	-0.0142165				50.8623	-0.00772987				50.9222	-0.00127368				50.9322	0.00512823				50.8926	0.011453				50.8041	0.0176788				50.6674	0.0237853
				20	0.05	43.55	20	50.4941	-0.0274543	50.5777	-0.0207051				50.7415	-0.0142178				50.8517	-0.00773635				50.9116	-0.00128523				50.9217	0.00511181				50.8822	0.0114319				50.7938	0.0176534				50.6573	0.0237559
				20	0.05	43.6	20	50.4834	-0.0274447	50.5671	-0.0207011				50.7309	-0.014219				50.841	-0.0077428				50.901	-0.00129674				50.9111	0.00509543				50.8718	0.0114109				50.7836	0.0176281				50.6473	0.0237265
				20	0.05	43.65	20	50.4728	-0.0274351	50.5565	-0.020697				50.7202	-0.0142203				50.8303	-0.00774922				50.8904	-0.00130821				50.9006	0.00507911				50.8614	0.01139				50.7733	0.0176028				50.6372	0.0236973
				20	0.05	43.7	20	50.4622	-0.0274255	50.5458	-0.020693				50.7095	-0.0142215				50.8197	-0.00775561				50.8798	-0.00131963				50.8901	0.00506285				50.851	0.0113691				50.7631	0.0175776				50.6272	0.0236681
				20	0.05	43.75	20	50.4516	-0.027416	50.5352	-0.0206889				50.6989	-0.0142227				50.809	-0.00776197				50.8692	-0.00133102				50.8796	0.00504663				50.8406	0.0113483				50.7529	0.0175525				50.6172	0.023639
				20	0.05	43.8	20	50.441	-0.0274064	50.5246	-0.0206849				50.6882	-0.0142239				50.7984	-0.0077683				50.8586	-0.00134236				50.8691	0.00503046				50.8302	0.0113276				50.7427	0.0175275				50.6071	0.02361
				20	0.05	43.85	20	50.4304	-0.0273969	50.514	-0.0206808				50.6776	-0.014225				50.7877	-0.00777461				50.848	-0.00135367				50.8586	0.00501435				50.8199	0.0113069				50.7325	0.0175025				50.5971	0.023581
				20	0.05	43.9	20	50.4198	-0.0273874	50.5034	-0.0206767				50.6669	-0.0142262				50.7771	-0.00778088				50.8374	-0.00136493				50.8481	0.00499828				50.8095	0.0112863				50.7223	0.0174776				50.5871	0.0235521
				20	0.05	43.95	20	50.4092	-0.0273778	50.4928	-0.0206727				50.6563	-0.0142273				50.7665	-0.00778712				50.8269	-0.00137615				50.8376	0.00498227				50.7991	0.0112657				50.7121	0.0174527				50.5771	0.0235233
				20	0.05	44	20	50.3987	-0.0273683	50.4822	-0.0206686				50.6457	-0.0142284				50.7559	-0.00779334				50.8163	-0.00138734				50.8271	0.00496631				50.7888	0.0112452				50.7019	0.0174279				50.5671	0.0234946
				20	0.05	44.05	20	50.3881	-0.0273588	50.4716	-0.0206645				50.6351	-0.0142295				50.7453	-0.00779952				50.8058	-0.00139848				50.8167	0.00495039				50.7785	0.0112247				50.6917	0.0174032				50.5571	0.0234659
				20	0.05	44.1	20	50.3776	-0.0273493	50.4611	-0.0206604				50.6245	-0.0142306				50.7347	-0.00780568				50.7952	-0.00140958				50.8062	0.00493453				50.7681	0.0112043				50.6815	0.0173786				50.5471	0.0234373
				20	0.05	44.15	20	50.367	-0.0273398	50.4505	-0.0206563				50.6139	-0.0142316				50.7241	-0.0078118				50.7847	-0.00142064				50.7958	0.00491871				50.7578	0.011184				50.6713	0.017354				50.5371	0.0234088
				20	0.05	44.2	20	50.3565	-0.0273303	50.44	-0.0206522				50.6033	-0.0142327				50.7136	-0.0078179				50.7742	-0.00143167				50.7853	0.00490295				50.7475	0.0111637				50.6612	0.0173295				50.5272	0.0233803
				20	0.05	44.25	20	50.346	-0.0273209	50.4294	-0.0206481				50.5928	-0.0142337				50.703	-0.00782397				50.7636	-0.00144265				50.7749	0.00488723				50.7372	0.0111435				50.651	0.017305				50.5172	0.0233519
				20	0.05	44.3	20	50.3355	-0.0273114	50.4189	-0.020644				50.5822	-0.0142347				50.6924	-0.00783001				50.7531	-0.0014536				50.7645	0.00487157				50.7269	0.0111233				50.6409	0.0172806				50.5072	0.0233236
				20	0.05	44.35	20	50.325	-0.0273019	50.4084	-0.0206399				50.5716	-0.0142357				50.6819	-0.00783603				50.7426	-0.00146451				50.7541	0.00485595				50.7166	0.0111032				50.6307	0.0172563				50.4973	0.0232954
				20	0.05	44.4	20	50.3145	-0.0272925	50.3979	-0.0206358				50.5611	-0.0142366				50.6714	-0.00784201				50.7321	-0.00147537				50.7436	0.00484038				50.7063	0.0110832				50.6206	0.017232				50.4873	0.0232672
				20	0.05	44.45	20	50.304	-0.027283	50.3873	-0.0206317				50.5506	-0.0142376				50.6608	-0.00784797				50.7216	-0.0014862				50.7332	0.00482485				50.696	0.0110632				50.6105	0.0172079				50.4774	0.0232391
				20	0.05	44.5	20	50.2935	-0.0272736	50.3769	-0.0206275				50.54	-0.0142385				50.6503	-0.0078539				50.7112	-0.001497				50.7228	0.00480938				50.6857	0.0110433				50.6004	0.0171837				50.4675	0.0232111
				20	0.05	44.55	20	50.283	-0.0272641	50.3664	-0.0206234				50.5295	-0.0142395				50.6398	-0.0078598				50.7007	-0.00150775				50.7125	0.00479395				50.6755	0.0110234				50.5902	0.0171596				50.4575	0.0231831
				20	0.05	44.6	20	50.2726	-0.0272547	50.3559	-0.0206193				50.519	-0.0142404				50.6293	-0.00786568				50.6902	-0.00151847				50.7021	0.00477857				50.6652	0.0110035				50.5801	0.0171356				50.4476	0.0231552
				20	0.05	44.65	20	50.2621	-0.0272453	50.3454	-0.0206151				50.5085	-0.0142413				50.6188	-0.00787153				50.6798	-0.00152915				50.6917	0.00476323				50.6549	0.0109838				50.57	0.0171117				50.4377	0.0231274
				20	0.05	44.7	20	50.2517	-0.0272359	50.3349	-0.020611				50.498	-0.0142421				50.6083	-0.00787735				50.6693	-0.00153979				50.6814	0.00474795				50.6447	0.0109641				50.5599	0.0170878				50.4278	0.0230996
				20	0.05	44.75	20	50.2412	-0.0272265	50.3245	-0.0206068				50.4875	-0.014243				50.5978	-0.00788314				50.6589	-0.00155039				50.671	0.00473271				50.6345	0.0109444				50.5499	0.017064				50.4179	0.0230719
				20	0.05	44.8	20	50.2308	-0.0272171	50.314	-0.0206027				50.477	-0.0142438				50.5873	-0.00788891				50.6485	-0.00156096				50.6606	0.00471751				50.6242	0.0109248				50.5398	0.0170402				50.408	0.0230443
				20	0.05	44.85	20	50.2204	-0.0272077	50.3036	-0.0205985				50.4666	-0.0142447				50.5769	-0.00789465				50.6381	-0.00157149				50.6503	0.00470236				50.614	0.0109052				50.5297	0.0170165				50.3981	0.0230167
				20	0.05	44.9	20	50.21	-0.0271983	50.2932	-0.0205943				50.4561	-0.0142455				50.5664	-0.00790037				50.6276	-0.00158198				50.64	0.00468726				50.6038	0.0108857				50.5196	0.0169929				50.3882	0.0229892
				20	0.05	44.95	20	50.1996	-0.027189	50.2828	-0.0205902				50.4456	-0.0142463				50.556	-0.00790606				50.6172	-0.00159244				50.6297	0.0046722				50.5936	0.0108663				50.5096	0.0169693				50.3784	0.0229618
				20	0.05	45	20	50.1892	-0.0271796	50.2723	-0.020586				50.4352	-0.0142471				50.5455	-0.00791172				50.6068	-0.00160286				50.6193	0.00465719				50.5834	0.0108469				50.4995	0.0169458				50.3685	0.0229344
				20	0.05	45.05	20	50.1788	-0.0271702	50.2619	-0.0205818				50.4248	-0.0142478				50.5351	-0.00791735				50.5965	-0.00161325				50.609	0.00464222				50.5732	0.0108276				50.4895	0.0169223				50.3586	0.0229071
				20	0.05	45.1	20	50.1684	-0.0271609	50.2515	-0.0205776				50.4143	-0.0142486				50.5247	-0.00792296				50.5861	-0.0016236				50.5987	0.0046273				50.563	0.0108083				50.4795	0.0168989				50.3488	0.0228799
				20	0.05	45.15	20	50.158	-0.0271515	50.2411	-0.0205734				50.4039	-0.0142493				50.5143	-0.00792855				50.5757	-0.00163391				50.5884	0.00461242				50.5528	0.0107891				50.4694	0.0168756				50.3389	0.0228527
				20	0.05	45.2	20	50.1477	-0.0271422	50.2308	-0.0205693				50.3935	-0.01425				50.5038	-0.00793411				50.5653	-0.00164419				50.5781	0.00459759				50.5427	0.0107699				50.4594	0.0168523				50.3291	0.0228256
				20	0.05	45.25	20	50.1373	-0.0271329	50.2204	-0.0205651				50.3831	-0.0142507				50.4934	-0.00793964				50.555	-0.00165444				50.5679	0.0045828				50.5325	0.0107508				50.4494	0.0168291				50.3192	0.0227985
				20	0.05	45.3	20	50.1269	-0.0271236	50.21	-0.0205609				50.3727	-0.0142514				50.4831	-0.00794515				50.5446	-0.00166464				50.5576	0.00456806				50.5223	0.0107317				50.4394	0.0168059				50.3094	0.0227715
				20	0.05	45.35	20	50.1166	-0.0271143	50.1997	-0.0205567				50.3623	-0.0142521				50.4727	-0.00795063				50.5343	-0.00167482				50.5473	0.00455335				50.5122	0.0107127				50.4294	0.0167828				50.2996	0.0227446
				20	0.05	45.4	20	50.1063	-0.0271049	50.1893	-0.0205524				50.3519	-0.0142528				50.4623	-0.00795609				50.5239	-0.00168496				50.5371	0.0045387				50.502	0.0106937				50.4194	0.0167597				50.2898	0.0227178
				20	0.05	45.45	20	50.0959	-0.0270956	50.179	-0.0205482				50.3415	-0.0142534				50.4519	-0.00796152				50.5136	-0.00169506				50.5268	0.00452408				50.4919	0.0106748				50.4094	0.0167368				50.2799	0.022691
				20	0.05	45.5	20	50.0856	-0.0270864	50.1686	-0.020544				50.3312	-0.014254				50.4416	-0.00796693				50.5033	-0.00170513				50.5166	0.00450951				50.4818	0.0106559				50.3994	0.0167138				50.2701	0.0226642
				20	0.05	45.55	20	50.0753	-0.0270771	50.1583	-0.0205398				50.3208	-0.0142546				50.4312	-0.00797232				50.493	-0.00171517				50.5063	0.00449498				50.4716	0.0106371				50.3894	0.0166909				50.2603	0.0226376
				20	0.05	45.6	20	50.065	-0.0270678	50.148	-0.0205356				50.3105	-0.0142552				50.4209	-0.00797767				50.4827	-0.00172517				50.4961	0.0044805				50.4615	0.0106183				50.3794	0.0166681				50.2505	0.022611
				20	0.05	45.65	20	50.0547	-0.0270585	50.1377	-0.0205314				50.3001	-0.0142558				50.4105	-0.00798301				50.4724	-0.00173514				50.4859	0.00446605				50.4514	0.0105996				50.3695	0.0166454				50.2408	0.0225844
				20	0.05	45.7	20	50.0444	-0.0270493	50.1274	-0.0205271				50.2898	-0.0142564				50.4002	-0.00798832				50.4621	-0.00174507				50.4757	0.00445165				50.4413	0.0105809				50.3595	0.0166226				50.231	0.0225579
				20	0.05	45.75	20	50.0342	-0.02704	50.1171	-0.0205229				50.2795	-0.014257				50.3899	-0.00799361				50.4518	-0.00175497				50.4655	0.00443729				50.4312	0.0105623				50.3496	0.0166				50.2212	0.0225315
				20	0.05	45.8	20	50.0239	-0.0270308	50.1068	-0.0205186				50.2691	-0.0142575				50.3796	-0.00799887				50.4415	-0.00176484				50.4553	0.00442297				50.4211	0.0105437				50.3396	0.0165774				50.2114	0.0225052
				20	0.05	45.85	20	50.0136	-0.0270215	50.0965	-0.0205144				50.2588	-0.014258				50.3692	-0.00800411				50.4313	-0.00177468				50.4451	0.0044087				50.4111	0.0105252				50.3297	0.0165549				50.2017	0.0224789
				20	0.05	45.9	20	50.0034	-0.0270123	50.0863	-0.0205102				50.2485	-0.0142586				50.3589	-0.00800932				50.421	-0.00178448				50.4349	0.00439446				50.401	0.0105067				50.3198	0.0165324				50.1919	0.0224526
				20	0.05	45.95	20	49.9931	-0.0270031	50.076	-0.0205059				50.2382	-0.0142591				50.3487	-0.00801451				50.4108	-0.00179425				50.4247	0.00438027				50.3909	0.0104883				50.3098	0.0165099				50.1822	0.0224264
				20	0.05	46	20	49.9829	-0.0269938	50.0658	-0.0205017				50.2279	-0.0142596				50.3384	-0.00801968				50.4005	-0.00180398				50.4146	0.00436611				50.3809	0.0104699				50.2999	0.0164876				50.1724	0.0224003
				20	0.05	46.05	20	49.9727	-0.0269846	50.0555	-0.0204974				50.2177	-0.01426				50.3281	-0.00802483				50.3903	-0.00181369				50.4044	0.004352				50.3708	0.0104516				50.29	0.0164652				50.1627	0.0223742
				20	0.05	46.1	20	49.9625	-0.0269754	50.0453	-0.0204931				50.2074	-0.0142605				50.3178	-0.00802995				50.3801	-0.00182336				50.3942	0.00433793				50.3608	0.0104333				50.2801	0.016443				50.1529	0.0223482
				20	0.05	46.15	20	49.9522	-0.0269662	50.035	-0.0204889				50.1971	-0.0142609				50.3076	-0.00803505				50.3698	-0.001833				50.3841	0.0043239				50.3507	0.0104151				50.2702	0.0164207				50.1432	0.0223223
				20	0.05	46.2	20	49.942	-0.026957	50.0248	-0.0204846				50.1869	-0.0142614				50.2973	-0.00804012				50.3596	-0.00184261				50.374	0.00430991				50.3407	0.0103969				50.2603	0.0163986				50.1335	0.0222964
				20	0.05	46.25	20	49.9318	-0.0269478	50.0146	-0.0204803				50.1766	-0.0142618				50.2871	-0.00804517				50.3494	-0.00185218				50.3638	0.00429595				50.3307	0.0103787				50.2504	0.0163765				50.1238	0.0222706
				20	0.05	46.3	20	49.9217	-0.0269387	50.0044	-0.0204761				50.1664	-0.0142622				50.2768	-0.0080502				50.3392	-0.00186173				50.3537	0.00428204				50.3206	0.0103606				50.2406	0.0163544				50.1141	0.0222448
				20	0.05	46.35	20	49.9115	-0.0269295	49.9942	-0.0204718				50.1561	-0.0142626				50.2666	-0.00805521				50.329	-0.00187124				50.3436	0.00426817				50.3106	0.0103426				50.2307	0.0163324				50.1044	0.0222191
				20	0.05	46.4	20	49.9013	-0.0269203	49.984	-0.0204675				50.1459	-0.014263				50.2564	-0.00806019				50.3188	-0.00188072				50.3335	0.00425434				50.3006	0.0103246				50.2208	0.0163105				50.0947	0.0221934
				20	0.05	46.45	20	49.8911	-0.0269112	49.9738	-0.0204632				50.1357	-0.0142634				50.2462	-0.00806516				50.3087	-0.00189018				50.3234	0.00424054				50.2906	0.0103066				50.211	0.0162886				50.085	0.0221678
				20	0.05	46.5	20	49.881	-0.026902	49.9636	-0.0204589				50.1255	-0.0142637				50.236	-0.0080701				50.2985	-0.0018996				50.3133	0.00422679				50.2806	0.0102887				50.2011	0.0162667				50.0753	0.0221423
				20	0.05	46.55	20	49.8708	-0.0268929	49.9535	-0.0204546				50.1153	-0.0142641				50.2258	-0.00807502				50.2883	-0.00190898				50.3032	0.00421307				50.2707	0.0102709				50.1913	0.0162449				50.0656	0.0221168
				20	0.05	46.6	20	49.8607	-0.0268837	49.9433	-0.0204503				50.1051	-0.0142644				50.2156	-0.00807991				50.2782	-0.00191834				50.2931	0.00419939				50.2607	0.010253				50.1814	0.0162232				50.056	0.0220914
				20	0.05	46.65	20	49.8505	-0.0268746	49.9332	-0.0204461				50.0949	-0.0142647				50.2054	-0.00808479				50.268	-0.00192767				50.283	0.00418575				50.2507	0.0102353				50.1716	0.0162015				50.0463	0.022066
				20	0.05	46.7	20	49.8404	-0.0268655	49.923	-0.0204418				50.0847	-0.014265				50.1952	-0.00808964				50.2579	-0.00193697				50.273	0.00417215				50.2408	0.0102175				50.1618	0.0161798				50.0366	0.0220407
				20	0.05	46.75	20	49.8303	-0.0268564	49.9129	-0.0204374				50.0746	-0.0142653				50.185	-0.00809447				50.2478	-0.00194624				50.2629	0.00415859				50.2308	0.0101999				50.1519	0.0161582				50.027	0.0220154
				20	0.05	46.8	20	49.8202	-0.0268473	49.9027	-0.0204331				50.0644	-0.0142656				50.1749	-0.00809928				50.2376	-0.00195547				50.2528	0.00414506				50.2208	0.0101822				50.1421	0.0161367				50.0173	0.0219902
				20	0.05	46.85	20	49.8101	-0.0268382	49.8926	-0.0204288				50.0542	-0.0142658				50.1647	-0.00810407				50.2275	-0.00196468				50.2428	0.00413157				50.2109	0.0101646				50.1323	0.0161152				50.0077	0.0219651
				20	0.05	46.9	20	49.8	-0.0268291	49.8825	-0.0204245				50.0441	-0.0142661				50.1546	-0.00810883				50.2174	-0.00197386				50.2328	0.00411812				50.201	0.0101471				50.1225	0.0160938				49.9981	0.02194
				20	0.05	46.95	20	49.7899	-0.02682	49.8724	-0.0204202				50.0339	-0.0142663				50.1444	-0.00811358				50.2073	-0.00198301				50.2227	0.00410471				50.191	0.0101296				50.1127	0.0160724				49.9884	0.0219149
				20	0.05	47	20	49.7798	-0.0268109	49.8623	-0.0204159				50.0238	-0.0142666				50.1343	-0.0081183				50.1972	-0.00199213				50.2127	0.00409133				50.1811	0.0101121				50.1029	0.016051				49.9788	0.0218899
				20	0.05	47.05	20	49.7697	-0.0268018	49.8522	-0.0204116				50.0137	-0.0142668				50.1242	-0.00812301				50.1871	-0.00200122				50.2027	0.00407799				50.1712	0.0100947				50.0932	0.0160297				49.9692	0.021865
				20	0.05	47.1	20	49.7597	-0.0267928	49.8421	-0.0204072				50.0036	-0.014267				50.114	-0.00812769				50.177	-0.00201028				50.1927	0.00406469				50.1613	0.0100773				50.0834	0.0160085				49.9596	0.0218401
				20	0.05	47.15	20	49.7496	-0.0267837	49.832	-0.0204029				49.9934	-0.0142672				50.1039	-0.00813235				50.167	-0.00201931				50.1827	0.00405142				50.1514	0.01006				50.0736	0.0159873				49.95	0.0218153
				20	0.05	47.2	20	49.7395	-0.0267746	49.822	-0.0203986				49.9833	-0.0142674				50.0938	-0.00813699				50.1569	-0.00202832				50.1727	0.00403819				50.1415	0.0100427				50.0639	0.0159662				49.9404	0.0217905
				20	0.05	47.25	20	49.7295	-0.0267656	49.8119	-0.0203942				49.9732	-0.0142676				50.0837	-0.00814161				50.1468	-0.00203729				50.1627	0.004025				50.1316	0.0100254				50.0541	0.0159451				49.9308	0.0217658
				20	0.05	47.3	20	49.7195	-0.0267566	49.8019	-0.0203899				49.9632	-0.0142677				50.0736	-0.00814621				50.1368	-0.00204624				50.1527	0.00401184				50.1217	0.0100082				50.0443	0.015924				49.9212	0.0217411
				20	0.05	47.35	20	49.7094	-0.0267475	49.7918	-0.0203856				49.9531	-0.0142679				50.0636	-0.00815079				50.1267	-0.00205515				50.1427	0.00399871				50.1118	0.00999108				50.0346	0.015903				49.9116	0.0217165
				20	0.05	47.4	20	49.6994	-0.0267385	49.7818	-0.0203812				49.943	-0.014268				50.0535	-0.00815535				50.1167	-0.00206404				50.1327	0.00398563				50.102	0.00997396				50.0249	0.0158821				49.902	0.0216919
				20	0.05	47.45	20	49.6894	-0.0267295	49.7717	-0.0203769				49.9329	-0.0142681				50.0434	-0.00815989				50.1067	-0.00207291				50.1228	0.00397257				50.0921	0.00995689				50.0151	0.0158612				49.8925	0.0216674
				20	0.05	47.5	20	49.6794	-0.0267205	49.7617	-0.0203725				49.9229	-0.0142682				50.0334	-0.00816442				50.0966	-0.00208174				50.1128	0.00395956				50.0823	0.00993985				50.0054	0.0158403				49.8829	0.0216429
				20	0.05	47.55	20	49.6694	-0.0267114	49.7517	-0.0203682				49.9128	-0.0142683				50.0233	-0.00816892				50.0866	-0.00209055				50.1029	0.00394657				50.0724	0.00992286				49.9957	0.0158195				49.8733	0.0216185
				20	0.05	47.6	20	49.6594	-0.0267024	49.7417	-0.0203638				49.9028	-0.0142684				50.0133	-0.0081734				50.0766	-0.00209932				50.0929	0.00393363				50.0626	0.0099059				49.986	0.0157987				49.8638	0.0215942
				20	0.05	47.65	20	49.6494	-0.0266935	49.7317	-0.0203595				49.8927	-0.0142685				50.0032	-0.00817786				50.0666	-0.00210808				50.083	0.00392071				50.0527	0.00988899				49.9763	0.015778				49.8542	0.0215698
				20	0.05	47.7	20	49.6394	-0.0266845	49.7217	-0.0203551				49.8827	-0.0142686				49.9932	-0.0081823				50.0566	-0.0021168				50.0731	0.00390784				50.0429	0.00987212				49.9666	0.0157573				49.8447	0.0215456
				20	0.05	47.75	20	49.6295	-0.0266755	49.7117	-0.0203508				49.8727	-0.0142686				49.9832	-0.00818672				50.0466	-0.0021255				50.0631	0.00389499				50.0331	0.00985529				49.9569	0.0157367				49.8352	0.0215214
				20	0.05	47.8	20	49.6195	-0.0266665	49.7017	-0.0203464				49.8627	-0.0142687				49.9732	-0.00819112				50.0366	-0.00213417				50.0532	0.00388218				50.0233	0.0098385				49.9472	0.0157161				49.8256	0.0214972
				20	0.05	47.85	20	49.6095	-0.0266575	49.6917	-0.020342				49.8527	-0.0142687				49.9632	-0.00819551				50.0267	-0.00214281				50.0433	0.00386941				50.0134	0.00982175				49.9375	0.0156956				49.8161	0.0214731
				20	0.05	47.9	20	49.5996	-0.0266486	49.6818	-0.0203377				49.8427	-0.0142687				49.9531	-0.00819987				50.0167	-0.00215142				50.0334	0.00385666				50.0036	0.00980504				49.9278	0.0156751				49.8066	0.021449
				20	0.05	47.95	20	49.5896	-0.0266396	49.6718	-0.0203333				49.8327	-0.0142688				49.9432	-0.00820422				50.0067	-0.00216001				50.0235	0.00384396				49.9938	0.00978837				49.9182	0.0156546				49.7971	0.021425
				20	0.05	48	20	49.5797	-0.0266307	49.6619	-0.0203289				49.8227	-0.0142688				49.9332	-0.00820855				49.9968	-0.00216858				50.0136	0.00383128				49.9841	0.00977174				49.9085	0.0156342				49.7876	0.0214011
				20	0.05	48.05	20	49.5698	-0.0266217	49.6519	-0.0203246				49.8127	-0.0142687				49.9232	-0.00821285				49.9868	-0.00217711				50.0037	0.00381864				49.9743	0.00975515				49.8989	0.0156139				49.7781	0.0213772
				20	0.05	48.1	20	49.5599	-0.0266128	49.642	-0.0203202				49.8027	-0.0142687				49.9132	-0.00821714				49.9769	-0.00218562				49.9939	0.00380603				49.9645	0.00973859				49.8892	0.0155936				49.7686	0.0213533
				20	0.05	48.15	20	49.5499	-0.0266039	49.632	-0.0203158				49.7927	-0.0142687				49.9032	-0.00822141				49.9669	-0.00219411				49.984	0.00379346				49.9547	0.00972208				49.8796	0.0155733				49.7591	0.0213295
				20	0.05	48.2	20	49.54	-0.0265949	49.6221	-0.0203114				49.7828	-0.0142687				49.8933	-0.00822567				49.957	-0.00220257				49.9741	0.00378091				49.945	0.00970561				49.8699	0.0155531				49.7496	0.0213057
				20	0.05	48.25	20	49.5301	-0.026586	49.6122	-0.020307				49.7728	-0.0142686				49.8833	-0.0082299				49.9471	-0.002211				49.9643	0.0037684				49.9352	0.00968917				49.8603	0.0155329				49.7402	0.021282
				20	0.05	48.3	20	49.5202	-0.0265771	49.6023	-0.0203027				49.7629	-0.0142686				49.8734	-0.00823412				49.9372	-0.0022194				49.9544	0.00375592				49.9255	0.00967278				49.8507	0.0155128				49.7307	0.0212583
				20	0.05	48.35	20	49.5104	-0.0265682	49.5924	-0.0202983				49.753	-0.0142685				49.8635	-0.00823831				49.9273	-0.00222779				49.9446	0.00374348				49.9157	0.00965642				49.8411	0.0154927				49.7212	0.0212347
				20	0.05	48.4	20	49.5005	-0.0265593	49.5825	-0.0202939				49.743	-0.0142684				49.8535	-0.00824249				49.9174	-0.00223614				49.9348	0.00373107				49.906	0.0096401				49.8314	0.0154726				49.7118	0.0212111
				20	0.05	48.45	20	49.4906	-0.0265504	49.5726	-0.0202895				49.7331	-0.0142683				49.8436	-0.00824665				49.9075	-0.00224447				49.9249	0.00371869				49.8962	0.00962381				49.8218	0.0154526				49.7023	0.0211876
				20	0.05	48.5	20	49.4807	-0.0265416	49.5627	-0.0202851				49.7232	-0.0142682				49.8337	-0.0082508				49.8976	-0.00225278				49.9151	0.00370634				49.8865	0.00960757				49.8122	0.0154326				49.6929	0.0211641
				20	0.05	48.55	20	49.4709	-0.0265327	49.5528	-0.0202807				49.7133	-0.0142681				49.8238	-0.00825492				49.8877	-0.00226106				49.9053	0.00369402				49.8768	0.00959136				49.8026	0.0154127				49.6834	0.0211407
				20	0.05	48.6	20	49.461	-0.0265238	49.543	-0.0202763				49.7034	-0.014268				49.8139	-0.00825903				49.8779	-0.00226931				49.8955	0.00368173				49.8671	0.00957519				49.7931	0.0153929				49.674	0.0211173
				20	0.05	48.65	20	49.4512	-0.0265149	49.5331	-0.0202719				49.6935	-0.0142678				49.804	-0.00826312				49.868	-0.00227754				49.8857	0.00366948				49.8574	0.00955906				49.7835	0.015373				49.6646	0.021094
				20	0.05	48.7	20	49.4414	-0.0265061	49.5233	-0.0202675				49.6836	-0.0142677				49.7941	-0.0082672				49.8581	-0.00228575				49.8759	0.00365725				49.8477	0.00954297				49.7739	0.0153532				49.6551	0.0210707
				20	0.05	48.75	20	49.4315	-0.0264972	49.5134	-0.0202631				49.6737	-0.0142675				49.7842	-0.00827125				49.8483	-0.00229393				49.8661	0.00364506				49.838	0.00952691				49.7643	0.0153335				49.6457	0.0210474
				20	0.05	48.8	20	49.4217	-0.0264884	49.5036	-0.0202587				49.6638	-0.0142674				49.7743	-0.00827529				49.8384	-0.00230209				49.8563	0.0036329				49.8283	0.00951089				49.7548	0.0153138				49.6363	0.0210242
				20	0.05	48.85	20	49.4119	-0.0264795	49.4937	-0.0202543				49.654	-0.0142672				49.7645	-0.00827931				49.8286	-0.00231022				49.8466	0.00362077				49.8186	0.0094949				49.7452	0.0152941				49.6269	0.0210011
				20	0.05	48.9	20	49.4021	-0.0264707	49.4839	-0.0202499				49.6441	-0.014267				49.7546	-0.00828331				49.8188	-0.00231833				49.8368	0.00360867				49.8089	0.00947895				49.7357	0.0152745				49.6175	0.0209779
				20	0.05	48.95	20	49.3923	-0.0264619	49.4741	-0.0202455				49.6343	-0.0142668				49.7447	-0.0082873				49.8089	-0.00232641				49.827	0.0035966				49.7993	0.00946304				49.7261	0.0152549				49.6081	0.0209549
				20	0.05	49	20	49.3825	-0.0264531	49.4643	-0.020241				49.6244	-0.0142666				49.7349	-0.00829127				49.7991	-0.00233447				49.8173	0.00358456				49.7896	0.00944716				49.7166	0.0152353				49.5987	0.0209319
				20	0.05	49.05	20	49.3727	-0.0264442	49.4545	-0.0202366				49.6146	-0.0142664				49.725	-0.00829522				49.7893	-0.00234251				49.8075	0.00357255				49.7799	0.00943132				49.707	0.0152158				49.5894	0.0209089
				20	0.05	49.1	20	49.3629	-0.0264354	49.4447	-0.0202322				49.6047	-0.0142662				49.7152	-0.00829916				49.7795	-0.00235052				49.7978	0.00356057				49.7703	0.00941552				49.6975	0.0151964				49.58	0.0208859
				20	0.05	49.15	20	49.3532	-0.0264266	49.4349	-0.0202278				49.5949	-0.014266				49.7054	-0.00830308				49.7697	-0.00235851				49.788	0.00354862				49.7607	0.00939975				49.688	0.0151769				49.5706	0.0208631
				20	0.05	49.2	20	49.3434	-0.0264178	49.4251	-0.0202234				49.5851	-0.0142658				49.6956	-0.00830698				49.7599	-0.00236648				49.7783	0.0035367				49.751	0.00938402				49.6785	0.0151576				49.5612	0.0208402
				20	0.05	49.25	20	49.3336	-0.0264091	49.4153	-0.0202189				49.5753	-0.0142655				49.6858	-0.00831087				49.7501	-0.00237442				49.7686	0.00352481				49.7414	0.00936832				49.669	0.0151382				49.5519	0.0208174
				20	0.05	49.3	20	49.3239	-0.0264003	49.4056	-0.0202145				49.5655	-0.0142653				49.6759	-0.00831474				49.7404	-0.00238234				49.7589	0.00351295				49.7318	0.00935265				49.6595	0.0151189				49.5425	0.0207947
				20	0.05	49.35	20	49.3141	-0.0263915	49.3958	-0.0202101				49.5557	-0.014265				49.6661	-0.0083186				49.7306	-0.00239024				49.7492	0.00350112				49.7221	0.00933702				49.65	0.0150997				49.5332	0.0207719
				20	0.05	49.4	20	49.3044	-0.0263827	49.386	-0.0202057				49.5459	-0.0142647				49.6564	-0.00832243				49.7208	-0.00239811				49.7395	0.00348932				49.7125	0.00932143				49.6405	0.0150804				49.5238	0.0207493
				20	0.05	49.45	20	49.2947	-0.026374	49.3763	-0.0202012				49.5361	-0.0142644				49.6466	-0.00832626				49.7111	-0.00240596				49.7298	0.00347755				49.7029	0.00930587				49.631	0.0150612				49.5145	0.0207266
				20	0.05	49.5	20	49.2849	-0.0263652	49.3666	-0.0201968				49.5263	-0.0142641				49.6368	-0.00833006				49.7013	-0.00241379				49.7201	0.0034658				49.6933	0.00929034				49.6215	0.0150421				49.5052	0.0207041
				20	0.05	49.55	20	49.2752	-0.0263564	49.3568	-0.0201924				49.5166	-0.0142638				49.627	-0.00833385				49.6916	-0.0024216				49.7104	0.00345409				49.6837	0.00927485				49.612	0.015023				49.4958	0.0206815
				20	0.05	49.6	20	49.2655	-0.0263477	49.3471	-0.0201879				49.5068	-0.0142635				49.6172	-0.00833762				49.6818	-0.00242938				49.7007	0.0034424				49.6741	0.0092594				49.6026	0.0150039				49.4865	0.020659
				20	0.05	49.65	20	49.2558	-0.026339	49.3374	-0.0201835				49.497	-0.0142632				49.6075	-0.00834138				49.6721	-0.00243714				49.691	0.00343074				49.6646	0.00924397				49.5931	0.0149849				49.4772	0.0206366
				20	0.05	49.7	20	49.2461	-0.0263302	49.3277	-0.0201791				49.4873	-0.0142629				49.5977	-0.00834512				49.6624	-0.00244488				49.6814	0.00341911				49.655	0.00922858				49.5836	0.0149659				49.4679	0.0206141
				20	0.05	49.75	20	49.2364	-0.0263215	49.3179	-0.0201746				49.4775	-0.0142625				49.588	-0.00834885				49.6527	-0.00245259				49.6717	0.00340751				49.6454	0.00921323				49.5742	0.0149469				49.4586	0.0205918
				20	0.05	49.8	20	49.2267	-0.0263128	49.3082	-0.0201702				49.4678	-0.0142622				49.5782	-0.00835256				49.643	-0.00246029				49.6621	0.00339593				49.6359	0.0091979				49.5648	0.014928				49.4493	0.0205694
				20	0.05	49.85	20	49.2171	-0.0263041	49.2985	-0.0201657				49.4581	-0.0142618				49.5685	-0.00835626				49.6333	-0.00246796				49.6524	0.00338439				49.6263	0.00918261				49.5553	0.0149091				49.44	0.0205472
				20	0.05	49.9	20	49.2074	-0.0262954	49.2889	-0.0201613				49.4484	-0.0142615				49.5588	-0.00835994				49.6236	-0.00247561				49.6428	0.00337287				49.6168	0.00916736				49.5459	0.0148903				49.4307	0.0205249
				20	0.05	49.95	20	49.1977	-0.0262867	49.2792	-0.0201569				49.4386	-0.0142611				49.5491	-0.0083636				49.6139	-0.00248324				49.6332	0.00336138				49.6072	0.00915213				49.5365	0.0148715				49.4214	0.0205027
				20	0.05	50	20	49.1881	-0.026278	49.2695	-0.0201524				49.4289	-0.0142607				49.5394	-0.00836725				49.6042	-0.00249085				49.6235	0.00334992				49.5977	0.00913694				49.527	0.0148527				49.4122	0.0204805
				20	0.05	50.05	20	49.1784	-0.0262693	49.2598	-0.020148				49.4192	-0.0142604				49.5297	-0.00837089				49.5945	-0.00249843				49.6139	0.00333848				49.5881	0.00912178				49.5176	0.014834				49.4029	0.0204584
				20	0.05	50.1	20	49.1688	-0.0262606	49.2502	-0.0201435				49.4095	-0.01426				49.52	-0.00837451				49.5848	-0.002506				49.6043	0.00332707				49.5786	0.00910666				49.5082	0.0148153				49.3936	0.0204363
				20	0.05	50.15	20	49.1591	-0.0262519	49.2405	-0.0201391				49.3998	-0.0142596				49.5103	-0.00837811				49.5752	-0.00251354				49.5947	0.00331569				49.5691	0.00909156				49.4988	0.0147967				49.3844	0.0204143
				20	0.05	50.2	20	49.1495	-0.0262432	49.2309	-0.0201346				49.3902	-0.0142591				49.5006	-0.0083817				49.5655	-0.00252106				49.5851	0.00330433				49.5596	0.0090765				49.4894	0.014778				49.3751	0.0203923
				20	0.05	50.25	20	49.1399	-0.0262346	49.2212	-0.0201302				49.3805	-0.0142587				49.4909	-0.00838528				49.5559	-0.00252856				49.5755	0.00329301				49.5501	0.00906147				49.48	0.0147595				49.3659	0.0203703
				20	0.05	50.3	20	49.1303	-0.0262259	49.2116	-0.0201257				49.3708	-0.0142583				49.4812	-0.00838884				49.5462	-0.00253604				49.5659	0.00328171				49.5406	0.00904647				49.4706	0.0147409				49.3566	0.0203484
				20	0.05	50.35	20	49.1207	-0.0262172	49.202	-0.0201213				49.3611	-0.0142579				49.4716	-0.00839238				49.5366	-0.0025435				49.5563	0.00327043				49.5311	0.00903151				49.4613	0.0147224				49.3474	0.0203265
				20	0.05	50.4	20	49.1111	-0.0262086	49.1923	-0.0201168				49.3515	-0.0142574				49.4619	-0.00839592				49.5269	-0.00255094				49.5468	0.00325918				49.5216	0.00901657				49.4519	0.0147039				49.3382	0.0203047
				20	0.05	50.45	20	49.1015	-0.0262	49.1827	-0.0201123				49.3418	-0.014257				49.4522	-0.00839943				49.5173	-0.00255836				49.5372	0.00324796				49.5121	0.00900167				49.4425	0.0146855				49.3289	0.0202829
				20	0.05	50.5	20	49.0919	-0.0261913	49.1731	-0.0201079				49.3322	-0.0142565				49.4426	-0.00840293				49.5077	-0.00256575				49.5276	0.00323677				49.5026	0.0089868				49.4332	0.0146671				49.3197	0.0202611
				20	0.05	50.55	20	49.0823	-0.0261827	49.1635	-0.0201034				49.3226	-0.014256				49.433	-0.00840642				49.4981	-0.00257313				49.5181	0.0032256				49.4932	0.00897196				49.4238	0.0146487				49.3105	0.0202394
				20	0.05	50.6	20	49.0727	-0.0261741	49.1539	-0.020099				49.3129	-0.0142556				49.4233	-0.0084099				49.4885	-0.00258049				49.5085	0.00321445				49.4837	0.00895715				49.4145	0.0146304				49.3013	0.0202177
				20	0.05	50.65	20	49.0631	-0.0261654	49.1443	-0.0200945				49.3033	-0.0142551				49.4137	-0.00841336				49.4789	-0.00258782				49.499	0.00320333				49.4742	0.00894237				49.4051	0.0146121				49.2921	0.020196
				20	0.05	50.7	20	49.0536	-0.0261568	49.1348	-0.02009				49.2937	-0.0142546				49.4041	-0.0084168				49.4693	-0.00259514				49.4894	0.00319224				49.4648	0.00892762				49.3958	0.0145938				49.2829	0.0201744
				20	0.05	50.75	20	49.044	-0.0261482	49.1252	-0.0200856				49.2841	-0.0142541				49.3945	-0.00842023				49.4597	-0.00260243				49.4799	0.00318118				49.4553	0.0089129				49.3864	0.0145756				49.2737	0.0201529
				20	0.05	50.8	20	49.0345	-0.0261396	49.1156	-0.0200811				49.2745	-0.0142536				49.3848	-0.00842365				49.4501	-0.00260971				49.4704	0.00317013				49.4459	0.00889822				49.3771	0.0145574				49.2645	0.0201313
				20	0.05	50.85	20	49.0249	-0.026131	49.1061	-0.0200766				49.2649	-0.0142531				49.3752	-0.00842705				49.4405	-0.00261697				49.4609	0.00315912				49.4365	0.00888356				49.3678	0.0145393				49.2553	0.0201098
				20	0.05	50.9	20	49.0154	-0.0261224	49.0965	-0.0200722				49.2553	-0.0142525				49.3656	-0.00843044				49.431	-0.0026242				49.4513	0.00314813				49.427	0.00886893				49.3585	0.0145211				49.2462	0.0200884
				20	0.05	50.95	20	49.0059	-0.0261138	49.0869	-0.0200677				49.2457	-0.014252				49.3561	-0.00843382				49.4214	-0.00263142				49.4418	0.00313716				49.4176	0.00885434				49.3492	0.0145031				49.237	0.0200669
				20	0.05	51	20	48.9963	-0.0261053	49.0774	-0.0200632				49.2361	-0.0142515				49.3465	-0.00843718				49.4118	-0.00263862				49.4323	0.00312622				49.4082	0.00883977				49.3399	0.014485				49.2278	0.0200456
				20	0.05	51.05	20	48.9868	-0.0260967	49.0679	-0.0200588				49.2265	-0.0142509				49.3369	-0.00844053				49.4023	-0.00264579				49.4228	0.00311531				49.3988	0.00882523				49.3306	0.014467				49.2187	0.0200242
				20	0.05	51.1	20	48.9773	-0.0260881	49.0583	-0.0200543				49.217	-0.0142504				49.3273	-0.00844387				49.3927	-0.00265295				49.4133	0.00310442				49.3894	0.00881072				49.3213	0.014449				49.2095	0.0200029
				20	0.05	51.15	20	48.9678	-0.0260796	49.0488	-0.0200498				49.2074	-0.0142498				49.3178	-0.00844719				49.3832	-0.00266009				49.4039	0.00309355				49.38	0.00879624				49.312	0.014431				49.2004	0.0199816
				20	0.05	51.2	20	48.9583	-0.026071	49.0393	-0.0200453				49.1979	-0.0142493				49.3082	-0.0084505				49.3737	-0.00266721				49.3944	0.00308271				49.3706	0.0087818				49.3027	0.0144131				49.1912	0.0199604
				20	0.05	51.25	20	48.9488	-0.0260625	49.0298	-0.0200409				49.1883	-0.0142487				49.2987	-0.00845379				49.3642	-0.00267431				49.3849	0.00307189				49.3612	0.00876738				49.2934	0.0143952				49.1821	0.0199392
				20	0.05	51.3	20	48.9393	-0.0260539	49.0203	-0.0200364				49.1788	-0.0142481				49.2891	-0.00845707				49.3546	-0.00268139				49.3755	0.0030611				49.3518	0.00875298				49.2842	0.0143774				49.173	0.0199181
				20	0.05	51.35	20	48.9298	-0.0260454	49.0108	-0.0200319				49.1692	-0.0142475				49.2796	-0.00846034				49.3451	-0.00268846				49.366	0.00305033				49.3425	0.00873862				49.2749	0.0143596				49.1638	0.0198969
				20	0.05	51.4	20	48.9204	-0.0260369	49.0013	-0.0200274				49.1597	-0.0142469				49.27	-0.0084636				49.3356	-0.0026955				49.3565	0.00303958				49.3331	0.00872429				49.2656	0.0143418				49.1547	0.0198758
				20	0.05	51.45	20	48.9109	-0.0260283	48.9918	-0.020023				49.1502	-0.0142463				49.2605	-0.00846684				49.3261	-0.00270253				49.3471	0.00302886				49.3237	0.00870998				49.2564	0.014324				49.1456	0.0198548
				20	0.05	51.5	20	48.9014	-0.0260198	48.9823	-0.0200185				49.1407	-0.0142457				49.251	-0.00847007				49.3166	-0.00270954				49.3377	0.00301816				49.3144	0.00869571				49.2471	0.0143063				49.1365	0.0198338
				20	0.05	51.55	20	48.892	-0.0260113	48.9729	-0.020014				49.1312	-0.0142451				49.2415	-0.00847329				49.3071	-0.00271652				49.3282	0.00300749				49.305	0.00868146				49.2379	0.0142886				49.1274	0.0198128
				20	0.05	51.6	20	48.8825	-0.0260028	48.9634	-0.0200095				49.1217	-0.0142445				49.232	-0.00847649				49.2977	-0.00272349				49.3188	0.00299684				49.2957	0.00866724				49.2287	0.014271				49.1183	0.0197918
				20	0.05	51.65	20	48.8731	-0.0259943	48.9539	-0.0200051				49.1122	-0.0142439				49.2225	-0.00847968				49.2882	-0.00273045				49.3094	0.00298621				49.2863	0.00865305				49.2194	0.0142533				49.1092	0.0197709
				20	0.05	51.7	20	48.8637	-0.0259858	48.9445	-0.0200006				49.1027	-0.0142432				49.213	-0.00848286				49.2787	-0.00273738				49.3	0.00297561				49.277	0.00863888				49.2102	0.0142357				49.1001	0.0197501
				20	0.05	51.75	20	48.8542	-0.0259773	48.935	-0.0199961				49.0932	-0.0142426				49.2035	-0.00848603				49.2692	-0.0027443				49.2906	0.00296503				49.2677	0.00862475				49.201	0.0142182				49.091	0.0197292
				20	0.05	51.8	20	48.8448	-0.0259688	48.9256	-0.0199916				49.0837	-0.0142419				49.194	-0.00848918				49.2598	-0.00275119				49.2811	0.00295447				49.2584	0.00861064				49.1918	0.0142006				49.0819	0.0197084
				20	0.05	51.85	20	48.8354	-0.0259603	48.9162	-0.0199871				49.0743	-0.0142413				49.1845	-0.00849233				49.2503	-0.00275807				49.2718	0.00294394				49.249	0.00859656				49.1826	0.0141831				49.0729	0.0196877
				20	0.05	51.9	20	48.826	-0.0259519	48.9067	-0.0199826				49.0648	-0.0142406				49.1751	-0.00849545				49.2409	-0.00276493				49.2624	0.00293343				49.2397	0.00858251				49.1734	0.0141657				49.0638	0.0196669
				20	0.05	51.95	20	48.8166	-0.0259434	48.8973	-0.0199782				49.0553	-0.0142399				49.1656	-0.00849857				49.2315	-0.00277178				49.253	0.00292294				49.2304	0.00856848				49.1642	0.0141482				49.0547	0.0196462
				20	0.05	52	20	48.8072	-0.0259349	48.8879	-0.0199737				49.0459	-0.0142393				49.1562	-0.00850167				49.222	-0.0027786				49.2436	0.00291247				49.2211	0.00855448				49.155	0.0141308				49.0457	0.0196256
				20	0.05	52.05	20	48.7978	-0.0259265	48.8785	-0.0199692				49.0365	-0.0142386				49.1467	-0.00850477				49.2126	-0.00278541				49.2342	0.00290203				49.2118	0.00854051				49.1458	0.0141135				49.0366	0.0196049
				20	0.05	52.1	20	48.7884	-0.025918	48.8691	-0.0199647				49.027	-0.0142379				49.1373	-0.00850785				49.2032	-0.0027922				49.2249	0.00289161				49.2025	0.00852656				49.1366	0.0140961				49.0276	0.0195843
				20	0.05	52.15	20	48.779	-0.0259096	48.8597	-0.0199602				49.0176	-0.0142372				49.1278	-0.00851091				49.1938	-0.00279898				49.2155	0.00288121				49.1933	0.00851265				49.1274	0.0140788				49.0186	0.0195638
				20	0.05	52.2	20	48.7697	-0.0259011	48.8503	-0.0199557				49.0082	-0.0142365				49.1184	-0.00851397				49.1844	-0.00280573				49.2061	0.00287084				49.184	0.00849876				49.1183	0.0140615				49.0095	0.0195432
				20	0.05	52.25	20	48.7603	-0.0258927	48.8409	-0.0199512				48.9987	-0.0142358				49.109	-0.00851701				49.175	-0.00281247				49.1968	0.00286048				49.1747	0.00848489				49.1091	0.0140443				49.0005	0.0195227
				20	0.05	52.3	20	48.7509	-0.0258843	48.8315	-0.0199468				48.9893	-0.0142351				49.0996	-0.00852005				49.1656	-0.0028192				49.1874	0.00285015				49.1655	0.00847105				49.1	0.0140271				48.9915	0.0195023
				20	0.05	52.35	20	48.7416	-0.0258758	48.8222	-0.0199423				48.9799	-0.0142344				49.0901	-0.00852307				49.1562	-0.0028259				49.1781	0.00283984				49.1562	0.00845724				49.0908	0.0140099				48.9824	0.0194819
				20	0.05	52.4	20	48.7322	-0.0258674	48.8128	-0.0199378				48.9705	-0.0142336				49.0807	-0.00852608				49.1468	-0.00283259				49.1688	0.00282955				49.1469	0.00844346				49.0817	0.0139927				48.9734	0.0194615
				20	0.05	52.45	20	48.7229	-0.025859	48.8034	-0.0199333				48.9611	-0.0142329				49.0713	-0.00852907				49.1374	-0.00283926				49.1595	0.00281929				49.1377	0.0084297				49.0725	0.0139756				48.9644	0.0194411
				20	0.05	52.5	20	48.7136	-0.0258506	48.7941	-0.0199288				48.9517	-0.0142322				49.0619	-0.00853206				49.128	-0.00284591				49.1501	0.00280904				49.1285	0.00841596				49.0634	0.0139585				48.9554	0.0194208
				20	0.05	52.55	20	48.7042	-0.0258422	48.7847	-0.0199243				48.9424	-0.0142314				49.0526	-0.00853503				49.1187	-0.00285255				49.1408	0.00279882				49.1192	0.00840226				49.0543	0.0139414				48.9464	0.0194005
				20	0.05	52.6	20	48.6949	-0.0258338	48.7754	-0.0199198				48.933	-0.0142307				49.0432	-0.00853799				49.1093	-0.00285917				49.1315	0.00278862				49.11	0.00838857				49.0451	0.0139244				48.9374	0.0193802
				20	0.05	52.65	20	48.6856	-0.0258254	48.7661	-0.0199153				48.9236	-0.0142299				49.0338	-0.00854094				49.1	-0.00286578				49.1222	0.00277844				49.1008	0.00837492				49.036	0.0139073				48.9284	0.01936
				20	0.05	52.7	20	48.6763	-0.025817	48.7567	-0.0199108				48.9142	-0.0142292				49.0244	-0.00854388				49.0906	-0.00287236				49.1129	0.00276828				49.0916	0.00836129				49.0269	0.0138904				48.9195	0.0193398
				20	0.05	52.75	20	48.667	-0.0258087	48.7474	-0.0199063				48.9049	-0.0142284				49.0151	-0.00854681				49.0813	-0.00287893				49.1036	0.00275814				49.0823	0.00834768				49.0178	0.0138734				48.9105	0.0193196
				20	0.05	52.8	20	48.6577	-0.0258003	48.7381	-0.0199018				48.8955	-0.0142276				49.0057	-0.00854973				49.0719	-0.00288549				49.0943	0.00274803				49.0731	0.0083341				49.0087	0.0138565				48.9015	0.0192995
				20	0.05	52.85	20	48.6484	-0.0257919	48.7288	-0.0198974				48.8862	-0.0142268				48.9964	-0.00855263				49.0626	-0.00289203				49.0851	0.00273793				49.0639	0.00832055				48.9996	0.0138396				48.8926	0.0192794
				20	0.05	52.9	20	48.6391	-0.0257835	48.7195	-0.0198929				48.8768	-0.0142261				48.987	-0.00855553				49.0533	-0.00289855				49.0758	0.00272786				49.0547	0.00830702				48.9905	0.0138227				48.8836	0.0192593
				20	0.05	52.95	20	48.6298	-0.0257752	48.7102	-0.0198884				48.8675	-0.0142253				48.9777	-0.00855841				49.044	-0.00290506				49.0665	0.0027178				49.0455	0.00829351				48.9814	0.0138059				48.8746	0.0192393
				20	0.05	53	20	48.6205	-0.0257668	48.7009	-0.0198839				48.8582	-0.0142245				48.9683	-0.00856128				49.0347	-0.00291155				49.0573	0.00270777				49.0364	0.00828003				48.9723	0.0137891				48.8657	0.0192193
				20	0.05	53.05	20	48.6113	-0.0257585	48.6916	-0.0198794				48.8489	-0.0142237				48.959	-0.00856415				49.0254	-0.00291802				49.048	0.00269775				49.0272	0.00826658				48.9633	0.0137723				48.8567	0.0191993
				20	0.05	53.1	20	48.602	-0.0257502	48.6823	-0.0198749				48.8396	-0.0142229				48.9497	-0.008567				49.0161	-0.00292448				49.0388	0.00268776				49.018	0.00825315				48.9542	0.0137555				48.8478	0.0191793
				20	0.05	53.15	20	48.5928	-0.0257418	48.6731	-0.0198704				48.8302	-0.014222				48.9404	-0.00856984				49.0068	-0.00293092				49.0295	0.00267779				49.0088	0.00823974				48.9451	0.0137388				48.8389	0.0191594
				20	0.05	53.2	20	48.5835	-0.0257335	48.6638	-0.0198659				48.8209	-0.0142212				48.9311	-0.00857266				48.9975	-0.00293735				49.0203	0.00266784				48.9997	0.00822636				48.9361	0.0137221				48.8299	0.0191396
				20	0.05	53.25	20	48.5743	-0.0257252	48.6545	-0.0198614				48.8116	-0.0142204				48.9218	-0.00857548				48.9882	-0.00294376				49.011	0.00265791				48.9905	0.008213				48.927	0.0137055				48.821	0.0191197
				20	0.05	53.3	20	48.565	-0.0257168	48.6453	-0.0198569				48.8024	-0.0142196				48.9125	-0.00857829				48.9789	-0.00295016				49.0018	0.002648				48.9814	0.00819967				48.918	0.0136888				48.8121	0.0190999
				20	0.05	53.35	20	48.5558	-0.0257085	48.636	-0.0198524				48.7931	-0.0142187				48.9032	-0.00858109				48.9696	-0.00295654				48.9926	0.0026381				48.9722	0.00818636				48.9089	0.0136722				48.8032	0.0190801
				20	0.05	53.4	20	48.5466	-0.0257002	48.6268	-0.0198479				48.7838	-0.0142179				48.8939	-0.00858387				48.9604	-0.0029629				48.9834	0.00262823				48.9631	0.00817308				48.8999	0.0136556				48.7943	0.0190603
				20	0.05	53.45	20	48.5374	-0.0256919	48.6175	-0.0198434				48.7745	-0.014217				48.8846	-0.00858665				48.9511	-0.00296925				48.9742	0.00261838				48.954	0.00815982				48.8909	0.0136391				48.7854	0.0190406
				20	0.05	53.5	20	48.5281	-0.0256836	48.6083	-0.0198389				48.7652	-0.0142162				48.8753	-0.00858941				48.9419	-0.00297559				48.965	0.00260855				48.9448	0.00814658				48.8819	0.0136225				48.7765	0.0190209
				20	0.05	53.55	20	48.5189	-0.0256753	48.5991	-0.0198344				48.756	-0.0142153				48.8661	-0.00859217				48.9326	-0.00298191				48.9558	0.00259874				48.9357	0.00813337				48.8728	0.013606				48.7676	0.0190012
				20	0.05	53.6	20	48.5097	-0.025667	48.5899	-0.0198299				48.7467	-0.0142145				48.8568	-0.00859491				48.9234	-0.00298821				48.9466	0.00258894				48.9266	0.00812018				48.8638	0.0135895				48.7587	0.0189816
				20	0.05	53.65	20	48.5005	-0.0256588	48.5807	-0.0198254				48.7375	-0.0142136				48.8475	-0.00859765				48.9142	-0.0029945				48.9374	0.00257917				48.9175	0.00810701				48.8548	0.0135731				48.7498	0.018962
				20	0.05	53.7	20	48.4914	-0.0256505	48.5714	-0.019821				48.7282	-0.0142127				48.8383	-0.00860037				48.9049	-0.00300077				48.9282	0.00256942				48.9084	0.00809387				48.8458	0.0135567				48.741	0.0189424
				20	0.05	53.75	20	48.4822	-0.0256422	48.5622	-0.0198165				48.719	-0.0142118				48.8291	-0.00860309				48.8957	-0.00300703				48.919	0.00255968				48.8993	0.00808075				48.8368	0.0135403				48.7321	0.0189229
				20	0.05	53.8	20	48.473	-0.025634	48.553	-0.019812				48.7098	-0.014211				48.8198	-0.00860579				48.8865	-0.00301328				48.9099	0.00254997				48.8902	0.00806765				48.8278	0.0135239				48.7232	0.0189034
				20	0.05	53.85	20	48.4638	-0.0256257	48.5439	-0.0198075				48.7005	-0.0142101				48.8106	-0.00860848				48.8773	-0.00301951				48.9007	0.00254027				48.8811	0.00805458				48.8188	0.0135076				48.7144	0.0188839
				20	0.05	53.9	20	48.4547	-0.0256174	48.5347	-0.019803				48.6913	-0.0142092				48.8014	-0.00861117				48.8681	-0.00302572				48.8915	0.00253059				48.872	0.00804152				48.8099	0.0134912				48.7055	0.0188644
				20	0.05	53.95	20	48.4455	-0.0256092	48.5255	-0.0197985				48.6821	-0.0142083				48.7921	-0.00861384				48.8589	-0.00303192				48.8824	0.00252094				48.8629	0.0080285				48.8009	0.0134749				48.6966	0.018845
				20	0.05	54	20	48.4363	-0.0256009	48.5163	-0.019794				48.6729	-0.0142074				48.7829	-0.00861651				48.8497	-0.00303811				48.8732	0.0025113				48.8539	0.00801549				48.7919	0.0134587				48.6878	0.0188256
				20	0.05	54.05	20	48.4272	-0.0255927	48.5072	-0.0197895				48.6637	-0.0142065				48.7737	-0.00861916				48.8405	-0.00304428				48.8641	0.00250168				48.8448	0.00800251				48.7829	0.0134424				48.679	0.0188062
				20	0.05	54.1	20	48.4181	-0.0255845	48.498	-0.019785				48.6545	-0.0142056				48.7645	-0.0086218				48.8313	-0.00305043				48.855	0.00249207				48.8358	0.00798955				48.774	0.0134262				48.6701	0.0187869
				20	0.05	54.15	20	48.4089	-0.0255762	48.4888	-0.0197805				48.6453	-0.0142046				48.7553	-0.00862444				48.8221	-0.00305658				48.8458	0.00248249				48.8267	0.00797661				48.765	0.01341				48.6613	0.0187675
				20	0.05	54.2	20	48.3998	-0.025568	48.4797	-0.019776				48.6361	-0.0142037				48.7461	-0.00862706				48.813	-0.0030627				48.8367	0.00247292				48.8176	0.0079637				48.7561	0.0133939				48.6525	0.0187483
				20	0.05	54.25	20	48.3907	-0.0255598	48.4706	-0.0197715				48.627	-0.0142028				48.7369	-0.00862968				48.8038	-0.00306882				48.8276	0.00246338				48.8086	0.0079508				48.7471	0.0133778				48.6437	0.018729
				20	0.05	54.3	20	48.3815	-0.0255516	48.4614	-0.019767				48.6178	-0.0142018				48.7278	-0.00863228				48.7946	-0.00307492				48.8185	0.00245385				48.7996	0.00793793				48.7382	0.0133616				48.6348	0.0187098
				20	0.05	54.35	20	48.3724	-0.0255434	48.4523	-0.0197625				48.6086	-0.0142009				48.7186	-0.00863488				48.7855	-0.003081				48.8094	0.00244434				48.7905	0.00792508				48.7293	0.0133456				48.626	0.0186906
				20	0.05	54.4	20	48.3633	-0.0255352	48.4432	-0.019758				48.5995	-0.0142				48.7094	-0.00863747				48.7763	-0.00308708				48.8003	0.00243485				48.7815	0.00791226				48.7203	0.0133295				48.6172	0.0186714
				20	0.05	54.45	20	48.3542	-0.025527	48.434	-0.0197535				48.5903	-0.014199				48.7003	-0.00864004				48.7672	-0.00309313				48.7912	0.00242537				48.7725	0.00789945				48.7114	0.0133135				48.6084	0.0186523
				20	0.05	54.5	20	48.3451	-0.0255188	48.4249	-0.019749				48.5812	-0.0141981				48.6911	-0.00864261				48.7581	-0.00309918				48.7821	0.00241592				48.7635	0.00788667				48.7025	0.0132975				48.5996	0.0186331
				20	0.05	54.55	20	48.336	-0.0255106	48.4158	-0.0197445				48.572	-0.0141971				48.682	-0.00864517				48.7489	-0.00310521				48.773	0.00240648				48.7545	0.00787391				48.6936	0.0132815				48.5908	0.018614
				20	0.05	54.6	20	48.327	-0.0255024	48.4067	-0.01974				48.5629	-0.0141961				48.6728	-0.00864772				48.7398	-0.00311123				48.7639	0.00239706				48.7455	0.00786117				48.6847	0.0132655				48.5821	0.018595
				20	0.05	54.65	20	48.3179	-0.0254943	48.3976	-0.0197355				48.5538	-0.0141952				48.6637	-0.00865026				48.7307	-0.00311723				48.7549	0.00238766				48.7365	0.00784845				48.6758	0.0132496				48.5733	0.018576
				20	0.05	54.7	20	48.3088	-0.0254861	48.3885	-0.019731				48.5446	-0.0141942				48.6545	-0.00865279				48.7216	-0.00312322				48.7458	0.00237827				48.7275	0.00783575				48.6669	0.0132337				48.5645	0.0185569
				20	0.05	54.75	20	48.2997	-0.0254779	48.3795	-0.0197265				48.5355	-0.0141932				48.6454	-0.00865531				48.7125	-0.00312919				48.7367	0.00236891				48.7185	0.00782308				48.658	0.0132178				48.5557	0.018538
				20	0.05	54.8	20	48.2907	-0.0254698	48.3704	-0.0197221				48.5264	-0.0141923				48.6363	-0.00865782				48.7034	-0.00313516				48.7277	0.00235956				48.7095	0.00781042				48.6491	0.0132019				48.547	0.018519
				20	0.05	54.85	20	48.2816	-0.0254616	48.3613	-0.0197176				48.5173	-0.0141913				48.6272	-0.00866033				48.6943	-0.0031411				48.7186	0.00235023				48.7005	0.00779779				48.6402	0.0131861				48.5382	0.0185001
				20	0.05	54.9	20	48.2726	-0.0254535	48.3522	-0.0197131				48.5082	-0.0141903				48.6181	-0.00866282				48.6852	-0.00314704				48.7096	0.00234091				48.6915	0.00778518				48.6313	0.0131703				48.5295	0.0184812
				20	0.05	54.95	20	48.2635	-0.0254453	48.3432	-0.0197086				48.4991	-0.0141893				48.609	-0.00866531				48.6761	-0.00315296				48.7006	0.00233161				48.6826	0.00777259				48.6225	0.0131545				48.5207	0.0184623
				20	0.05	55	20	48.2545	-0.0254372	48.3341	-0.0197041				48.49	-0.0141883				48.5999	-0.00866778				48.667	-0.00315887				48.6915	0.00232233				48.6736	0.00776002				48.6136	0.0131387				48.512	0.0184435
				20	0.05	55.05	20	48.2455	-0.0254291	48.3251	-0.0196996				48.4809	-0.0141873				48.5908	-0.00867025				48.6579	-0.00316477				48.6825	0.00231307				48.6646	0.00774747				48.6047	0.013123				48.5032	0.0184247
				20	0.05	55.1	20	48.2365	-0.0254209	48.316	-0.0196951				48.4718	-0.0141863				48.5817	-0.00867271				48.6489	-0.00317065				48.6735	0.00230383				48.6557	0.00773494				48.5959	0.0131073				48.4945	0.0184059
				20	0.05	55.15	20	48.2274	-0.0254128	48.307	-0.0196906				48.4628	-0.0141853				48.5726	-0.00867516				48.6398	-0.00317652				48.6645	0.0022946				48.6468	0.00772243				48.587	0.0130916				48.4858	0.0183871
				20	0.05	55.2	20	48.2184	-0.0254047	48.298	-0.0196861				48.4537	-0.0141843				48.5635	-0.0086776				48.6307	-0.00318238				48.6554	0.00228538				48.6378	0.00770994				48.5782	0.0130759				48.4771	0.0183684
				20	0.05	55.25	20	48.2094	-0.0253966	48.2889	-0.0196816				48.4446	-0.0141832				48.5545	-0.00868003				48.6217	-0.00318822				48.6464	0.00227619				48.6289	0.00769747				48.5694	0.0130603				48.4683	0.0183497
				20	0.05	55.3	20	48.2004	-0.0253885	48.2799	-0.0196771				48.4356	-0.0141822				48.5454	-0.00868246				48.6127	-0.00319405				48.6374	0.00226701				48.6199	0.00768503				48.5605	0.0130446				48.4596	0.018331
				20	0.05	55.35	20	48.1914	-0.0253804	48.2709	-0.0196726				48.4265	-0.0141812				48.5363	-0.00868487				48.6036	-0.00319987				48.6284	0.00225785				48.611	0.0076726				48.5517	0.013029				48.4509	0.0183123
				20	0.05	55.4	20	48.1824	-0.0253723	48.2619	-0.0196682				48.4175	-0.0141801				48.5273	-0.00868728				48.5946	-0.00320568				48.6194	0.0022487				48.6021	0.00766019				48.5429	0.0130135				48.4422	0.0182937
				20	0.05	55.45	20	48.1734	-0.0253642	48.2529	-0.0196637				48.4084	-0.0141791				48.5182	-0.00868968				48.5856	-0.00321147				48.6105	0.00223958				48.5932	0.0076478				48.5341	0.0129979				48.4335	0.0182751
				20	0.05	55.5	20	48.1645	-0.0253561	48.2439	-0.0196592				48.3994	-0.0141781				48.5092	-0.00869207				48.5765	-0.00321725				48.6015	0.00223046				48.5843	0.00763544				48.5253	0.0129824				48.4248	0.0182565
				20	0.05	55.55	20	48.1555	-0.025348	48.2349	-0.0196547				48.3904	-0.014177				48.5002	-0.00869445				48.5675	-0.00322302				48.5925	0.00222137				48.5754	0.00762309				48.5164	0.0129669				48.4161	0.0182379
				20	0.05	55.6	20	48.1465	-0.0253399	48.2259	-0.0196502				48.3814	-0.014176				48.4911	-0.00869682				48.5585	-0.00322877				48.5835	0.00221229				48.5665	0.00761076				48.5076	0.0129514				48.4075	0.0182194
				20	0.05	55.65	20	48.1375	-0.0253319	48.2169	-0.0196457				48.3723	-0.0141749				48.4821	-0.00869919				48.5495	-0.00323452				48.5746	0.00220323				48.5576	0.00759846				48.4988	0.0129359				48.3988	0.0182009
				20	0.05	55.7	20	48.1286	-0.0253238	48.208	-0.0196412				48.3633	-0.0141739				48.4731	-0.00870154				48.5405	-0.00324025				48.5656	0.00219418				48.5487	0.00758617				48.4901	0.0129205				48.3901	0.0181824
				20	0.05	55.75	20	48.1196	-0.0253157	48.199	-0.0196367				48.3543	-0.0141728				48.4641	-0.00870389				48.5315	-0.00324597				48.5567	0.00218515				48.5398	0.0075739				48.4813	0.0129051				48.3814	0.018164
				20	0.05	55.8	20	48.1107	-0.0253077	48.19	-0.0196322				48.3453	-0.0141717				48.4551	-0.00870623				48.5225	-0.00325167				48.5477	0.00217613				48.531	0.00756165				48.4725	0.0128897				48.3728	0.0181455
				20	0.05	55.85	20	48.1018	-0.0252996	48.1811	-0.0196278				48.3363	-0.0141707				48.4461	-0.00870856				48.5135	-0.00325737				48.5388	0.00216713				48.5221	0.00754942				48.4637	0.0128743				48.3641	0.0181271
				20	0.05	55.9	20	48.0928	-0.0252916	48.1721	-0.0196233				48.3273	-0.0141696				48.4371	-0.00871089				48.5045	-0.00326305				48.5299	0.00215815				48.5132	0.00753721				48.4549	0.012859				48.3555	0.0181088
				20	0.05	55.95	20	48.0839	-0.0252835	48.1632	-0.0196188				48.3184	-0.0141685				48.4281	-0.0087132				48.4956	-0.00326872				48.5209	0.00214918				48.5044	0.00752502				48.4462	0.0128437				48.3468	0.0180904
				20	0.05	56	20	48.075	-0.0252755	48.1542	-0.0196143				48.3094	-0.0141675				48.4191	-0.00871551				48.4866	-0.00327437				48.512	0.00214023				48.4955	0.00751285				48.4374	0.0128284				48.3382	0.0180721
				20	0.05	56.05	20	48.0661	-0.0252675	48.1453	-0.0196098				48.3004	-0.0141664				48.4101	-0.00871781				48.4776	-0.00328002				48.5031	0.0021313				48.4867	0.0075007				48.4287	0.0128131				48.3296	0.0180538
				20	0.05	56.1	20	48.0571	-0.0252594	48.1364	-0.0196053				48.2915	-0.0141653				48.4011	-0.0087201				48.4687	-0.00328565				48.4942	0.00212238				48.4778	0.00748856				48.4199	0.0127978				48.3209	0.0180355
				20	0.05	56.15	20	48.0482	-0.0252514	48.1274	-0.0196008				48.2825	-0.0141642				48.3922	-0.00872239				48.4597	-0.00329128				48.4853	0.00211347				48.469	0.00747645				48.4112	0.0127826				48.3123	0.0180172
				20	0.05	56.2	20	48.0393	-0.0252434	48.1185	-0.0195964				48.2735	-0.0141631				48.3832	-0.00872466				48.4508	-0.00329689				48.4764	0.00210458				48.4601	0.00746435				48.4024	0.0127674				48.3037	0.017999
				20	0.05	56.25	20	48.0304	-0.0252354	48.1096	-0.0195919				48.2646	-0.014162				48.3743	-0.00872693				48.4419	-0.00330248				48.4675	0.00209571				48.4513	0.00745228				48.3937	0.0127522				48.2951	0.0179808
				20	0.05	56.3	20	48.0215	-0.0252274	48.1007	-0.0195874				48.2556	-0.0141609				48.3653	-0.00872919				48.4329	-0.00330807				48.4586	0.00208685				48.4425	0.00744022				48.385	0.012737				48.2864	0.0179626
				20	0.05	56.35	20	48.0127	-0.0252194	48.0918	-0.0195829				48.2467	-0.0141598				48.3564	-0.00873144				48.424	-0.00331365				48.4497	0.00207801				48.4337	0.00742818				48.3762	0.0127219				48.2778	0.0179445
				20	0.05	56.4	20	48.0038	-0.0252114	48.0829	-0.0195784				48.2378	-0.0141587				48.3474	-0.00873369				48.4151	-0.00331921				48.4408	0.00206918				48.4249	0.00741616				48.3675	0.0127067				48.2692	0.0179263
				20	0.05	56.45	20	47.9949	-0.0252034	48.074	-0.019574				48.2288	-0.0141576				48.3385	-0.00873592				48.4061	-0.00332476				48.4319	0.00206037				48.416	0.00740416				48.3588	0.0126916				48.2606	0.0179082
				20	0.05	56.5	20	47.986	-0.0251954	48.0651	-0.0195695				48.2199	-0.0141564				48.3295	-0.00873815				48.3972	-0.0033303				48.4231	0.00205157				48.4072	0.00739217				48.3501	0.0126765				48.252	0.0178901
				20	0.05	56.55	20	47.9772	-0.0251874	48.0562	-0.019565				48.211	-0.0141553				48.3206	-0.00874038				48.3883	-0.00333583				48.4142	0.00204279				48.3985	0.00738021				48.3414	0.0126615				48.2435	0.0178721
				20	0.05	56.6	20	47.9683	-0.0251795	48.0474	-0.0195605				48.2021	-0.0141542				48.3117	-0.00874259				48.3794	-0.00334135				48.4053	0.00203402				48.3897	0.00736826				48.3327	0.0126464				48.2349	0.017854
				20	0.05	56.65	20	47.9595	-0.0251715	48.0385	-0.019556				48.1932	-0.0141531				48.3028	-0.0087448				48.3705	-0.00334686				48.3965	0.00202527				48.3809	0.00735633				48.324	0.0126314				48.2263	0.017836
				20	0.05	56.7	20	47.9506	-0.0251635	48.0296	-0.0195516				48.1843	-0.0141519				48.2939	-0.008747				48.3616	-0.00335235				48.3876	0.00201653				48.3721	0.00734442				48.3153	0.0126164				48.2177	0.017818
				20	0.05	56.75	20	47.9418	-0.0251556	48.0208	-0.0195471				48.1754	-0.0141508				48.285	-0.00874919				48.3528	-0.00335784				48.3788	0.0020078				48.3633	0.00733252				48.3066	0.0126014				48.2092	0.0178001
				20	0.05	56.8	20	47.933	-0.0251476	48.0119	-0.0195426				48.1665	-0.0141497				48.2761	-0.00875138				48.3439	-0.00336331				48.37	0.0019991				48.3545	0.00732065				48.2979	0.0125865				48.2006	0.0177821
				20	0.05	56.85	20	47.9241	-0.0251397	48.0031	-0.0195381				48.1576	-0.0141485				48.2672	-0.00875355				48.335	-0.00336877				48.3611	0.0019904				48.3458	0.00730879				48.2893	0.0125715				48.192	0.0177642
				20	0.05	56.9	20	47.9153	-0.0251317	47.9942	-0.0195337				48.1488	-0.0141474				48.2583	-0.00875572				48.3261	-0.00337422				48.3523	0.00198172				48.337	0.00729695				48.2806	0.0125566				48.1835	0.0177463
				20	0.05	56.95	20	47.9065	-0.0251238	47.9854	-0.0195292				48.1399	-0.0141462				48.2494	-0.00875789				48.3173	-0.00337966				48.3435	0.00197306				48.3283	0.00728513				48.2719	0.0125417				48.1749	0.0177284
				20	0.05	57	20	47.8977	-0.0251158	47.9766	-0.0195247				48.131	-0.0141451				48.2406	-0.00876004				48.3084	-0.00338509				48.3347	0.00196441				48.3195	0.00727332				48.2633	0.0125269				48.1664	0.0177106
				20	0.05	57.05	20	47.8889	-0.0251079	47.9677	-0.0195202				48.1222	-0.0141439				48.2317	-0.00876219				48.2996	-0.00339051				48.3259	0.00195577				48.3108	0.00726154				48.2546	0.012512				48.1579	0.0176927
				20	0.05	57.1	20	47.8801	-0.0251	47.9589	-0.0195158				48.1133	-0.0141428				48.2228	-0.00876433				48.2907	-0.00339591				48.317	0.00194715				48.302	0.00724977				48.246	0.0124972				48.1493	0.0176749
				20	0.05	57.15	20	47.8713	-0.0250921	47.9501	-0.0195113				48.1045	-0.0141416				48.214	-0.00876647				48.2819	-0.00340131				48.3082	0.00193854				48.2933	0.00723801				48.2373	0.0124823				48.1408	0.0176572
				20	0.05	57.2	20	47.8625	-0.0250841	47.9413	-0.0195068				48.0956	-0.0141405				48.2051	-0.00876859				48.273	-0.0034067				48.2995	0.00192995				48.2846	0.00722628				48.2287	0.0124675				48.1323	0.0176394
				20	0.05	57.25	20	47.8537	-0.0250762	47.9325	-0.0195024				48.0868	-0.0141393				48.1963	-0.00877071				48.2642	-0.00341207				48.2907	0.00192137				48.2758	0.00721456				48.2201	0.0124528				48.1237	0.0176217
				20	0.05	57.3	20	47.8449	-0.0250683	47.9237	-0.0194979				48.0779	-0.0141381				48.1874	-0.00877283				48.2554	-0.00341743				48.2819	0.0019128				48.2671	0.00720286				48.2114	0.012438				48.1152	0.0176039
				20	0.05	57.35	20	47.8361	-0.0250604	47.9149	-0.0194934				48.0691	-0.0141369				48.1786	-0.00877493				48.2465	-0.00342279				48.2731	0.00190425				48.2584	0.00719118				48.2028	0.0124233				48.1067	0.0175862
				20	0.05	57.4	20	47.8274	-0.0250525	47.9061	-0.019489				48.0603	-0.0141358				48.1697	-0.00877703				48.2377	-0.00342813				48.2643	0.00189572				48.2497	0.00717951				48.1942	0.0124086				48.0982	0.0175686
				20	0.05	57.45	20	47.8186	-0.0250446	47.8973	-0.0194845				48.0515	-0.0141346				48.1609	-0.00877913				48.2289	-0.00343346				48.2556	0.00188719				48.241	0.00716786				48.1856	0.0123939				48.0897	0.0175509
				20	0.05	57.5	20	47.8098	-0.0250367	47.8886	-0.01948				48.0427	-0.0141334				48.1521	-0.00878121				48.2201	-0.00343879				48.2468	0.00187868				48.2323	0.00715623				48.177	0.0123792				48.0812	0.0175333
				20	0.05	57.55	20	47.8011	-0.0250289	47.8798	-0.0194756				48.0339	-0.0141322				48.1433	-0.00878329				48.2113	-0.0034441				48.238	0.00187019				48.2236	0.00714461				48.1684	0.0123645				48.0727	0.0175157
				20	0.05	57.6	20	47.7923	-0.025021	47.871	-0.0194711				48.0251	-0.014131				48.1345	-0.00878536				48.2025	-0.0034494				48.2293	0.0018617				48.2149	0.00713302				48.1598	0.0123499				48.0643	0.0174981
				20	0.05	57.65	20	47.7836	-0.0250131	47.8623	-0.0194666				48.0163	-0.0141298				48.1257	-0.00878743				48.1937	-0.00345469				48.2205	0.00185324				48.2062	0.00712143				48.1512	0.0123353				48.0558	0.0174805
				20	0.05	57.7	20	47.7749	-0.0250052	47.8535	-0.0194622				48.0075	-0.0141286				48.1169	-0.00878949				48.185	-0.00345997				48.2118	0.00184478				48.1976	0.00710987				48.1426	0.0123207				48.0473	0.017463
				20	0.05	57.75	20	47.7661	-0.0249974	47.8448	-0.0194577				47.9987	-0.0141274				48.1081	-0.00879154				48.1762	-0.00346524				48.2031	0.00183634				48.1889	0.00709832				48.134	0.0123061				48.0388	0.0174455
				20	0.05	57.8	20	47.7574	-0.0249895	47.836	-0.0194533				47.9899	-0.0141262				48.0993	-0.00879358				48.1674	-0.0034705				48.1943	0.00182791				48.1802	0.00708679				48.1254	0.0122916				48.0304	0.017428
				20	0.05	57.85	20	47.7487	-0.0249817	47.8273	-0.0194488				47.9811	-0.014125				48.0905	-0.00879562				48.1586	-0.00347575				48.1856	0.0018195				48.1716	0.00707527				48.1169	0.012277				48.0219	0.0174105
				20	0.05	57.9	20	47.74	-0.0249738	47.8185	-0.0194443				47.9724	-0.0141238				48.0817	-0.00879765				48.1499	-0.00348099				48.1769	0.0018111				48.1629	0.00706377				48.1083	0.0122625				48.0134	0.0173931
				20	0.05	57.95	20	47.7313	-0.024966	47.8098	-0.0194399				47.9636	-0.0141226				48.073	-0.00879968				48.1411	-0.00348622				48.1682	0.00180271				48.1543	0.00705229				48.0997	0.012248				48.005	0.0173756
				20	0.05	58	20	47.7226	-0.0249581	47.8011	-0.0194354				47.9548	-0.0141214				48.0642	-0.0088017				48.1324	-0.00349144				48.1594	0.00179434				48.1456	0.00704082				48.0912	0.0122335				47.9965	0.0173582
				20	0.05	58.05	20	47.7139	-0.0249503	47.7924	-0.019431				47.9461	-0.0141202				48.0554	-0.00880371				48.1236	-0.00349665				48.1507	0.00178597				48.137	0.00702937				48.0826	0.012219				47.9881	0.0173408
				20	0.05	58.1	20	47.7052	-0.0249425	47.7837	-0.0194265				47.9373	-0.014119				48.0467	-0.00880572				48.1149	-0.00350185				48.142	0.00177763				48.1283	0.00701794				48.0741	0.0122046				47.9797	0.0173235
				20	0.05	58.15	20	47.6965	-0.0249346	47.775	-0.019422				47.9286	-0.0141178				48.0379	-0.00880772				48.1061	-0.00350704				48.1333	0.00176929				48.1197	0.00700652				48.0655	0.0121902				47.9712	0.0173061
				20	0.05	58.2	20	47.6878	-0.0249268	47.7663	-0.0194176				47.9199	-0.0141165				48.0292	-0.00880971				48.0974	-0.00351222				48.1246	0.00176097				48.1111	0.00699512				48.057	0.0121758				47.9628	0.0172888
				20	0.05	58.25	20	47.6791	-0.024919	47.7576	-0.0194131				47.9111	-0.0141153				48.0204	-0.0088117				48.0887	-0.00351739				48.116	0.00175266				48.1025	0.00698373				48.0485	0.0121614				47.9544	0.0172715
				20	0.05	58.3	20	47.6704	-0.0249112	47.7489	-0.0194087				47.9024	-0.0141141				48.0117	-0.00881368				48.08	-0.00352255				48.1073	0.00174436				48.0938	0.00697236				48.0399	0.012147				47.946	0.0172542
				20	0.05	58.35	20	47.6618	-0.0249034	47.7402	-0.0194042				47.8937	-0.0141128				48.003	-0.00881565				48.0712	-0.0035277				48.0986	0.00173608				48.0852	0.00696101				48.0314	0.0121327				47.9376	0.0172369
				20	0.05	58.4	20	47.6531	-0.0248956	47.7315	-0.0193998				47.885	-0.0141116				47.9942	-0.00881762				48.0625	-0.00353285				48.0899	0.00172781				48.0766	0.00694967				48.0229	0.0121183				47.9292	0.0172197
				20	0.05	58.45	20	47.6445	-0.0248878	47.7228	-0.0193953				47.8763	-0.0141104				47.9855	-0.00881958				48.0538	-0.00353798				48.0813	0.00171955				48.068	0.00693835				48.0144	0.012104				47.9208	0.0172025
				20	0.05	58.5	20	47.6358	-0.02488	47.7142	-0.0193909				47.8676	-0.0141091				47.9768	-0.00882154				48.0451	-0.0035431				48.0726	0.00171131				48.0594	0.00692704				48.0059	0.0120897				47.9124	0.0171853
				20	0.05	58.55	20	47.6272	-0.0248722	47.7055	-0.0193864				47.8589	-0.0141079				47.9681	-0.00882349				48.0364	-0.00354821				48.064	0.00170308				48.0508	0.00691575				47.9974	0.0120754				47.904	0.0171681
				20	0.05	58.6	20	47.6185	-0.0248644	47.6968	-0.019382				47.8502	-0.0141066				47.9594	-0.00882543				48.0278	-0.00355332				48.0553	0.00169486				48.0422	0.00690447				47.9889	0.0120612				47.8956	0.0171509
				20	0.05	58.65	20	47.6099	-0.0248567	47.6882	-0.0193776				47.8415	-0.0141054				47.9507	-0.00882737				48.0191	-0.00355841				48.0467	0.00168665				48.0337	0.00689321				47.9804	0.0120469				47.8872	0.0171338
				20	0.05	58.7	20	47.6013	-0.0248489	47.6795	-0.0193731				47.8328	-0.0141041				47.942	-0.0088293				48.0104	-0.0035635				48.038	0.00167846				48.0251	0.00688196				47.9719	0.0120327				47.8788	0.0171167
				20	0.05	58.75	20	47.5926	-0.0248411	47.6709	-0.0193687				47.8241	-0.0141029				47.9333	-0.00883122				48.0017	-0.00356857				48.0294	0.00167027				48.0165	0.00687073				47.9634	0.0120185				47.8704	0.0170996
				20	0.05	58.8	20	47.584	-0.0248334	47.6623	-0.0193642				47.8154	-0.0141016				47.9246	-0.00883314				47.993	-0.00357364				48.0208	0.0016621				48.008	0.00685952				47.9549	0.0120043				47.8621	0.0170825
				20	0.05	58.85	20	47.5754	-0.0248256	47.6536	-0.0193598				47.8068	-0.0141004				47.916	-0.00883506				47.9844	-0.0035787				48.0121	0.00165395				47.9994	0.00684832				47.9464	0.0119901				47.8537	0.0170654
				20	0.05	58.9	20	47.5668	-0.0248179	47.645	-0.0193553				47.7981	-0.0140991				47.9073	-0.00883696				47.9757	-0.00358374				48.0035	0.0016458				47.9908	0.00683713				47.938	0.011976				47.8453	0.0170484
				20	0.05	58.95	20	47.5582	-0.0248101	47.6364	-0.0193509				47.7894	-0.0140979				47.8986	-0.00883887				47.9671	-0.00358878				47.9949	0.00163767				47.9823	0.00682596				47.9295	0.0119618				47.837	0.0170314
				20	0.05	59	20	47.5496	-0.0248024	47.6278	-0.0193465				47.7808	-0.0140966				47.89	-0.00884076				47.9584	-0.00359381				47.9863	0.00162955				47.9737	0.00681481				47.9211	0.0119477				47.8286	0.0170144
				20	0.05	59.05	20	47.541	-0.0247946	47.6191	-0.019342				47.7721	-0.0140953				47.8813	-0.00884265				47.9498	-0.00359883				47.9777	0.00162144				47.9652	0.00680367				47.9126	0.0119336				47.8203	0.0169974
				20	0.05	59.1	20	47.5324	-0.0247869	47.6105	-0.0193376				47.7635	-0.0140941				47.8726	-0.00884453				47.9411	-0.00360384				47.9691	0.00161334				47.9567	0.00679255				47.9041	0.0119195				47.812	0.0169804
				20	0.05	59.15	20	47.5238	-0.0247792	47.6019	-0.0193332				47.7549	-0.0140928				47.864	-0.00884641				47.9325	-0.00360884				47.9605	0.00160526				47.9481	0.00678144				47.8957	0.0119055				47.8036	0.0169635
				20	0.05	59.2	20	47.5152	-0.0247714	47.5933	-0.0193287				47.7462	-0.0140915				47.8554	-0.00884829				47.9239	-0.00361384				47.9519	0.00159719				47.9396	0.00677034				47.8873	0.0118914				47.7953	0.0169466
				20	0.05	59.25	20	47.5067	-0.0247637	47.5847	-0.0193243				47.7376	-0.0140902				47.8467	-0.00885015				47.9153	-0.00361882				47.9433	0.00158913				47.9311	0.00675926				47.8788	0.0118774				47.787	0.0169297
				20	0.05	59.3	20	47.4981	-0.024756	47.5762	-0.0193199				47.729	-0.0140889				47.8381	-0.00885201				47.9067	-0.0036238				47.9348	0.00158108				47.9226	0.0067482				47.8704	0.0118634				47.7786	0.0169128
				20	0.05	59.35	20	47.4895	-0.0247483	47.5676	-0.0193154				47.7204	-0.0140877				47.8295	-0.00885387				47.898	-0.00362876				47.9262	0.00157304				47.9141	0.00673714				47.862	0.0118494				47.7703	0.0168959
				20	0.05	59.4	20	47.481	-0.0247406	47.559	-0.019311				47.7118	-0.0140864				47.8208	-0.00885572				47.8894	-0.00363372				47.9176	0.00156502				47.9056	0.00672611				47.8536	0.0118354				47.762	0.0168791
				20	0.05	59.45	20	47.4724	-0.0247329	47.5504	-0.0193066				47.7032	-0.0140851				47.8122	-0.00885756				47.8808	-0.00363867				47.9091	0.00155701				47.8971	0.00671509				47.8451	0.0118214				47.7537	0.0168623
				20	0.05	59.5	20	47.4639	-0.0247252	47.5419	-0.0193021				47.6946	-0.0140838				47.8036	-0.0088594				47.8722	-0.00364361				47.9005	0.001549				47.8886	0.00670408				47.8367	0.0118075				47.7454	0.0168455
				20	0.05	59.55	20	47.4553	-0.0247175	47.5333	-0.0192977				47.686	-0.0140825				47.795	-0.00886123				47.8636	-0.00364854				47.8919	0.00154102				47.8801	0.00669309				47.8283	0.0117936				47.7371	0.0168287
				20	0.05	59.6	20	47.4468	-0.0247098	47.5248	-0.0192933				47.6774	-0.0140812				47.7864	-0.00886306				47.8551	-0.00365347				47.8834	0.00153304				47.8716	0.00668211				47.8199	0.0117797				47.7288	0.0168119
				20	0.05	59.65	20	47.4383	-0.0247021	47.5162	-0.0192889				47.6688	-0.0140799				47.7778	-0.00886488				47.8465	-0.00365838				47.8748	0.00152507				47.8631	0.00667114				47.8115	0.0117658				47.7205	0.0167952
				20	0.05	59.7	20	47.4297	-0.0246944	47.5077	-0.0192844				47.6602	-0.0140786				47.7692	-0.0088667				47.8379	-0.00366329				47.8663	0.00151712				47.8546	0.00666019				47.8031	0.0117519				47.7122	0.0167784
				20	0.05	59.75	20	47.4212	-0.0246868	47.4991	-0.01928				47.6516	-0.0140773				47.7606	-0.00886851				47.8293	-0.00366818				47.8578	0.00150917				47.8462	0.00664926				47.7947	0.011738				47.704	0.0167617
				20	0.05	59.8	20	47.4127	-0.0246791	47.4906	-0.0192756				47.6431	-0.014076				47.7521	-0.00887032				47.8208	-0.00367307				47.8493	0.00150124				47.8377	0.00663834				47.7864	0.0117242				47.6957	0.016745
				20	0.05	59.85	20	47.4042	-0.0246714	47.4821	-0.0192712				47.6345	-0.0140747				47.7435	-0.00887212				47.8122	-0.00367795				47.8407	0.00149332				47.8292	0.00662743				47.778	0.0117104				47.6874	0.0167284
				20	0.05	59.9	20	47.3957	-0.0246638	47.4735	-0.0192668				47.6259	-0.0140734				47.7349	-0.00887391				47.8037	-0.00368282				47.8322	0.00148541				47.8208	0.00661654				47.7696	0.0116965				47.6791	0.0167117
				20	0.05	59.95	20	47.3872	-0.0246561	47.465	-0.0192623				47.6174	-0.0140721				47.7264	-0.0088757				47.7951	-0.00368769				47.8237	0.00147751				47.8123	0.00660566				47.7612	0.0116827				47.6709	0.0166951
				20	0.05	60	20	47.3787	-0.0246485	47.4565	-0.0192579				47.6088	-0.0140708				47.7178	-0.00887749				47.7866	-0.00369254				47.8152	0.00146963				47.8039	0.00659479				47.7529	0.011669				47.6626	0.0166785
				20	0.05	60.05	20	47.3702	-0.0246408	47.448	-0.0192535				47.6003	-0.0140695				47.7092	-0.00887926				47.778	-0.00369739				47.8067	0.00146175				47.7954	0.00658394				47.7445	0.0116552				47.6544	0.0166619
				20	0.05	60.1	20	47.3617	-0.0246332	47.4395	-0.0192491				47.5918	-0.0140682				47.7007	-0.00888104				47.7695	-0.00370223				47.7982	0.00145389				47.787	0.0065731				47.7362	0.0116415				47.6461	0.0166453
				20	0.05	60.15	20	47.3532	-0.0246255	47.431	-0.0192447				47.5832	-0.0140668				47.6921	-0.00888281				47.761	-0.00370706				47.7897	0.00144603				47.7786	0.00656228				47.7278	0.0116277				47.6379	0.0166287
				20	0.05	60.2	20	47.3447	-0.0246179	47.4225	-0.0192403				47.5747	-0.0140655				47.6836	-0.00888457				47.7524	-0.00371188				47.7812	0.00143819				47.7701	0.00655147				47.7195	0.011614				47.6296	0.0166122
				20	0.05	60.25	20	47.3363	-0.0246103	47.414	-0.0192359				47.5662	-0.0140642				47.6751	-0.00888633				47.7439	-0.00371669				47.7727	0.00143036				47.7617	0.00654067				47.7111	0.0116003				47.6214	0.0165957
				20	0.05	60.3	20	47.3278	-0.0246027	47.4055	-0.0192314				47.5577	-0.0140629				47.6665	-0.00888808				47.7354	-0.0037215				47.7642	0.00142254				47.7533	0.00652989				47.7028	0.0115866				47.6132	0.0165792
				20	0.05	60.35	20	47.3194	-0.024595	47.397	-0.019227				47.5491	-0.0140616				47.658	-0.00888983				47.7269	-0.0037263				47.7558	0.00141473				47.7449	0.00651912				47.6945	0.011573				47.605	0.0165627
				20	0.05	60.4	20	47.3109	-0.0245874	47.3886	-0.0192226				47.5406	-0.0140602				47.6495	-0.00889157				47.7184	-0.00373109				47.7473	0.00140693				47.7365	0.00650836				47.6862	0.0115593				47.5967	0.0165462
				20	0.05	60.45	20	47.3024	-0.0245798	47.3801	-0.0192182				47.5321	-0.0140589				47.641	-0.00889331				47.7099	-0.00373587				47.7388	0.00139915				47.7281	0.00649762				47.6778	0.0115457				47.5885	0.0165297
				20	0.05	60.5	20	47.294	-0.0245722	47.3716	-0.0192138				47.5236	-0.0140576				47.6325	-0.00889504				47.7014	-0.00374064				47.7304	0.00139137				47.7197	0.00648689				47.6695	0.0115321				47.5803	0.0165133
				20	0.05	60.55	20	47.2856	-0.0245646	47.3632	-0.0192094				47.5151	-0.0140562				47.624	-0.00889677				47.6929	-0.00374541				47.7219	0.00138361				47.7113	0.00647618				47.6612	0.0115185				47.5721	0.0164969
				20	0.05	60.6	20	47.2771	-0.024557	47.3547	-0.019205				47.5067	-0.0140549				47.6155	-0.00889849				47.6844	-0.00375016				47.7135	0.00137585				47.7029	0.00646547				47.6529	0.0115049				47.5639	0.0164805
				20	0.05	60.65	20	47.2687	-0.0245494	47.3463	-0.0192006				47.4982	-0.0140536				47.607	-0.00890021				47.6759	-0.00375491				47.705	0.00136811				47.6945	0.00645478				47.6446	0.0114913				47.5557	0.0164641
				20	0.05	60.7	20	47.2603	-0.0245418	47.3378	-0.0191962				47.4897	-0.0140522				47.5985	-0.00890192				47.6675	-0.00375965				47.6966	0.00136037				47.6861	0.00644411				47.6363	0.0114777				47.5475	0.0164478
				20	0.05	60.75	20	47.2519	-0.0245342	47.3294	-0.0191918				47.4812	-0.0140509				47.59	-0.00890363				47.659	-0.00376439				47.6882	0.00135265				47.6778	0.00643345				47.628	0.0114642				47.5393	0.0164314
				20	0.05	60.8	20	47.2434	-0.0245267	47.321	-0.0191874				47.4728	-0.0140495				47.5815	-0.00890534				47.6505	-0.00376911				47.6797	0.00134494				47.6694	0.0064228				47.6197	0.0114507				47.5312	0.0164151
				20	0.05	60.85	20	47.235	-0.0245191	47.3125	-0.019183				47.4643	-0.0140482				47.5731	-0.00890703				47.6421	-0.00377383				47.6713	0.00133723				47.661	0.00641216				47.6115	0.0114372				47.523	0.0163988
				20	0.05	60.9	20	47.2266	-0.0245115	47.3041	-0.0191786				47.4558	-0.0140468				47.5646	-0.00890873				47.6336	-0.00377854				47.6629	0.00132954				47.6527	0.00640154				47.6032	0.0114237				47.5148	0.0163825
				20	0.05	60.95	20	47.2182	-0.024504	47.2957	-0.0191742				47.4474	-0.0140455				47.5561	-0.00891042				47.6252	-0.00378325				47.6545	0.00132186				47.6443	0.00639093				47.5949	0.0114102				47.5066	0.0163662
				20	0.05	61	20	47.2098	-0.0244964	47.2873	-0.0191698				47.4389	-0.0140441				47.5477	-0.0089121				47.6167	-0.00378794				47.6461	0.00131419				47.636	0.00638033				47.5866	0.0113967				47.4985	0.0163499
				20	0.05	61.05	20	47.2014	-0.0244888	47.2789	-0.0191655				47.4305	-0.0140428				47.5392	-0.00891378				47.6083	-0.00379263				47.6377	0.00130653				47.6276	0.00636974				47.5784	0.0113833				47.4903	0.0163337
				20	0.05	61.1	20	47.1931	-0.0244813	47.2705	-0.0191611				47.4221	-0.0140414				47.5308	-0.00891545				47.5998	-0.00379731				47.6293	0.00129888				47.6193	0.00635917				47.5701	0.0113698				47.4822	0.0163175
				20	0.05	61.15	20	47.1847	-0.0244737	47.2621	-0.0191567				47.4136	-0.0140401				47.5223	-0.00891712				47.5914	-0.00380198				47.6209	0.00129124				47.6109	0.00634861				47.5619	0.0113564				47.474	0.0163013
				20	0.05	61.2	20	47.1763	-0.0244662	47.2537	-0.0191523				47.4052	-0.0140387				47.5139	-0.00891879				47.583	-0.00380665				47.6125	0.00128361				47.6026	0.00633807				47.5536	0.011343				47.4659	0.0162851
				20	0.05	61.25	20	47.1679	-0.0244587	47.2453	-0.0191479				47.3968	-0.0140374				47.5055	-0.00892045				47.5746	-0.0038113				47.6041	0.00127599				47.5943	0.00632753				47.5454	0.0113296				47.4577	0.0162689
				20	0.05	61.3	20	47.1596	-0.0244511	47.2369	-0.0191435				47.3884	-0.014036				47.497	-0.0089221				47.5661	-0.00381595				47.5957	0.00126838				47.586	0.00631701				47.5371	0.0113163				47.4496	0.0162528
				20	0.05	61.35	20	47.1512	-0.0244436	47.2285	-0.0191391				47.3799	-0.0140346				47.4886	-0.00892375				47.5577	-0.00382059				47.5874	0.00126079				47.5777	0.00630651				47.5289	0.0113029				47.4415	0.0162366
				20	0.05	61.4	20	47.1428	-0.0244361	47.2202	-0.0191348				47.3715	-0.0140333				47.4802	-0.0089254				47.5493	-0.00382523				47.579	0.0012532				47.5693	0.00629601				47.5207	0.0112896				47.4333	0.0162205
				20	0.05	61.45	20	47.1345	-0.0244286	47.2118	-0.0191304				47.3631	-0.0140319				47.4718	-0.00892704				47.5409	-0.00382986				47.5706	0.00124562				47.561	0.00628553				47.5124	0.0112762				47.4252	0.0162044
				20	0.05	61.5	20	47.1261	-0.024421	47.2034	-0.019126				47.3547	-0.0140306				47.4634	-0.00892868				47.5325	-0.00383448				47.5623	0.00123805				47.5527	0.00627506				47.5042	0.0112629				47.4171	0.0161883
				20	0.05	61.55	20	47.1178	-0.0244135	47.1951	-0.0191216				47.3463	-0.0140292				47.455	-0.00893031				47.5241	-0.00383909				47.5539	0.00123049				47.5444	0.0062646				47.496	0.0112496				47.409	0.0161722
				20	0.05	61.6	20	47.1095	-0.024406	47.1867	-0.0191172				47.338	-0.0140278				47.4466	-0.00893194				47.5158	-0.0038437				47.5456	0.00122294				47.5361	0.00625415				47.4878	0.0112363				47.4009	0.0161562
				20	0.05	61.65	20	47.1011	-0.0243985	47.1784	-0.0191129				47.3296	-0.0140264				47.4382	-0.00893356				47.5074	-0.00384829				47.5372	0.0012154				47.5279	0.00624372				47.4796	0.0112231				47.3928	0.0161401
				20	0.05	61.7	20	47.0928	-0.024391	47.17	-0.0191085				47.3212	-0.0140251				47.4298	-0.00893518				47.499	-0.00385289				47.5289	0.00120787				47.5196	0.0062333				47.4714	0.0112098				47.3847	0.0161241
				20	0.05	61.75	20	47.0845	-0.0243835	47.1617	-0.0191041				47.3128	-0.0140237				47.4214	-0.0089368				47.4906	-0.00385747				47.5205	0.00120035				47.5113	0.00622289				47.4632	0.0111966				47.3766	0.0161081
				20	0.05	61.8	20	47.0762	-0.024376	47.1534	-0.0190997				47.3044	-0.0140223				47.413	-0.00893841				47.4823	-0.00386205				47.5122	0.00119284				47.503	0.00621249				47.455	0.0111833				47.3685	0.0160921
				20	0.05	61.85	20	47.0679	-0.0243686	47.145	-0.0190954				47.2961	-0.0140209				47.4047	-0.00894001				47.4739	-0.00386662				47.5039	0.00118534				47.4948	0.00620211				47.4468	0.0111701				47.3604	0.0160761
				20	0.05	61.9	20	47.0596	-0.0243611	47.1367	-0.019091				47.2877	-0.0140196				47.3963	-0.00894162				47.4655	-0.00387118				47.4956	0.00117785				47.4865	0.00619174				47.4386	0.0111569				47.3523	0.0160602
				20	0.05	61.95	20	47.0513	-0.0243536	47.1284	-0.0190866				47.2794	-0.0140182				47.3879	-0.00894321				47.4572	-0.00387573				47.4872	0.00117037				47.4782	0.00618138				47.4304	0.0111438				47.3442	0.0160442
				20	0.05	62	20	47.043	-0.0243461	47.1201	-0.0190823				47.271	-0.0140168				47.3796	-0.00894481				47.4488	-0.00388028				47.4789	0.0011629				47.47	0.00617103				47.4223	0.0111306				47.3362	0.0160283
				20	0.05	62.05	20	47.0347	-0.0243387	47.1118	-0.0190779				47.2627	-0.0140154				47.3712	-0.00894639				47.4405	-0.00388482				47.4706	0.00115544				47.4617	0.00616069				47.4141	0.0111174				47.3281	0.0160124
				20	0.05	62.1	20	47.0264	-0.0243312	47.1035	-0.0190736				47.2543	-0.014014				47.3629	-0.00894798				47.4322	-0.00388936				47.4623	0.00114799				47.4535	0.00615037				47.4059	0.0111043				47.32	0.0159965
				20	0.05	62.15	20	47.0181	-0.0243238	47.0952	-0.0190692				47.246	-0.0140126				47.3545	-0.00894956				47.4238	-0.00389388				47.454	0.00114055				47.4452	0.00614005				47.3978	0.0110912				47.312	0.0159807
				20	0.05	62.2	20	47.0098	-0.0243163	47.0869	-0.0190648				47.2377	-0.0140112				47.3462	-0.00895113				47.4155	-0.00389841				47.4457	0.00113311				47.437	0.00612975				47.3896	0.011078				47.3039	0.0159648
				20	0.05	62.25	20	47.0016	-0.0243088	47.0786	-0.0190605				47.2294	-0.0140099				47.3378	-0.00895271				47.4072	-0.00390292				47.4374	0.00112569				47.4288	0.00611947				47.3815	0.011065				47.2959	0.015949
				20	0.05	62.3	20	46.9933	-0.0243014	47.0703	-0.0190561				47.221	-0.0140085				47.3295	-0.00895427				47.3989	-0.00390743				47.4292	0.00111828				47.4206	0.00610919				47.3733	0.0110519				47.2878	0.0159331
				20	0.05	62.35	20	46.985	-0.024294	47.062	-0.0190518				47.2127	-0.0140071				47.3212	-0.00895584				47.3906	-0.00391193				47.4209	0.00111087				47.4123	0.00609892				47.3652	0.0110388				47.2798	0.0159173
				20	0.05	62.4	20	46.9768	-0.0242865	47.0537	-0.0190474				47.2044	-0.0140057				47.3129	-0.0089574				47.3822	-0.00391642				47.4126	0.00110348				47.4041	0.00608867				47.357	0.0110257				47.2718	0.0159015
				20	0.05	62.45	20	46.9685	-0.0242791	47.0455	-0.0190431				47.1961	-0.0140043				47.3046	-0.00895895				47.3739	-0.0039209				47.4043	0.00109609				47.3959	0.00607843				47.3489	0.0110127				47.2637	0.0158857
				20	0.05	62.5	20	46.9603	-0.0242717	47.0372	-0.0190387				47.1878	-0.0140029				47.2962	-0.0089605				47.3656	-0.00392538				47.3961	0.00108872				47.3877	0.0060682				47.3408	0.0109997				47.2557	0.01587
				20	0.05	62.55	20	46.952	-0.0242642	47.0289	-0.0190343				47.1795	-0.0140015				47.2879	-0.00896205				47.3574	-0.00392986				47.3878	0.00108135				47.3795	0.00605798				47.3327	0.0109867				47.2477	0.0158542
				20	0.05	62.6	20	46.9438	-0.0242568	47.0207	-0.01903				47.1712	-0.0140001				47.2796	-0.00896359				47.3491	-0.00393432				47.3796	0.00107399				47.3713	0.00604777				47.3245	0.0109736				47.2397	0.0158385
				20	0.05	62.65	20	46.9356	-0.0242494	47.0124	-0.0190257				47.1629	-0.0139987				47.2713	-0.00896513				47.3408	-0.00393878				47.3713	0.00106664				47.3631	0.00603758				47.3164	0.0109607				47.2317	0.0158228
				20	0.05	62.7	20	46.9273	-0.024242	47.0042	-0.0190213				47.1547	-0.0139973				47.263	-0.00896666				47.3325	-0.00394323				47.3631	0.0010593				47.3549	0.00602739				47.3083	0.0109477				47.2236	0.0158071
				20	0.05	62.75	20	46.9191	-0.0242346	46.996	-0.019017				47.1464	-0.0139959				47.2548	-0.00896819				47.3242	-0.00394768				47.3548	0.00105197				47.3467	0.00601722				47.3002	0.0109347				47.2156	0.0157914
				20	0.05	62.8	20	46.9109	-0.0242272	46.9877	-0.0190126				47.1381	-0.0139945				47.2465	-0.00896972				47.316	-0.00395212				47.3466	0.00104465				47.3386	0.00600706				47.2921	0.0109218				47.2076	0.0157757
				20	0.05	62.85	20	46.9027	-0.0242198	46.9795	-0.0190083				47.1299	-0.0139931				47.2382	-0.00897124				47.3077	-0.00395655				47.3384	0.00103734				47.3304	0.00599691				47.284	0.0109088				47.1996	0.0157601
				20	0.05	62.9	20	46.8945	-0.0242124	46.9713	-0.0190039				47.1216	-0.0139917				47.2299	-0.00897276				47.2994	-0.00396098				47.3301	0.00103003				47.3222	0.00598677				47.2759	0.0108959				47.1917	0.0157444
				20	0.05	62.95	20	46.8863	-0.024205	46.963	-0.0189996				47.1133	-0.0139903				47.2217	-0.00897428				47.2912	-0.0039654				47.3219	0.00102274				47.3141	0.00597665				47.2679	0.010883				47.1837	0.0157288
				20	0.05	63	20	46.8781	-0.0241976	46.9548	-0.0189953				47.1051	-0.0139888				47.2134	-0.00897579				47.2829	-0.00396981				47.3137	0.00101545				47.3059	0.00596653				47.2598	0.0108701				47.1757	0.0157132
				20	0.05	63.05	20	46.8699	-0.0241903	46.9466	-0.0189909				47.0968	-0.0139874				47.2051	-0.00897729				47.2747	-0.00397422				47.3055	0.00100818				47.2977	0.00595643				47.2517	0.0108572				47.1677	0.0156976
				20	0.05	63.1	20	46.8617	-0.0241829	46.9384	-0.0189866				47.0886	-0.013986				47.1969	-0.0089788				47.2664	-0.00397862				47.2973	0.00100091				47.2896	0.00594633				47.2436	0.0108444				47.1597	0.015682
				20	0.05	63.15	20	46.8535	-0.0241755	46.9302	-0.0189823				47.0804	-0.0139846				47.1886	-0.0089803				47.2582	-0.00398301				47.2891	0.000993651				47.2814	0.00593625				47.2356	0.0108315				47.1518	0.0156665
				20	0.05	63.2	20	46.8453	-0.0241681	46.922	-0.0189779				47.0721	-0.0139832				47.1804	-0.00898179				47.25	-0.0039874				47.2809	0.000986401				47.2733	0.00592618				47.2275	0.0108187				47.1438	0.0156509
				20	0.05	63.25	20	46.8371	-0.0241608	46.9138	-0.0189736				47.0639	-0.0139818				47.1722	-0.00898328				47.2417	-0.00399178				47.2727	0.00097916				47.2652	0.00591612				47.2194	0.0108059				47.1358	0.0156354
				20	0.05	63.3	20	46.829	-0.0241534	46.9056	-0.0189693				47.0557	-0.0139804				47.1639	-0.00898477				47.2335	-0.00399616				47.2645	0.000971928				47.257	0.00590607				47.2114	0.010793				47.1279	0.0156199
				20	0.05	63.35	20	46.8208	-0.0241461	46.8974	-0.0189649				47.0475	-0.0139789				47.1557	-0.00898625				47.2253	-0.00400053				47.2563	0.000964704				47.2489	0.00589603				47.2033	0.0107802				47.1199	0.0156044
				20	0.05	63.4	20	46.8126	-0.0241387	46.8893	-0.0189606				47.0393	-0.0139775				47.1475	-0.00898773				47.2171	-0.00400489				47.2481	0.000957489				47.2408	0.005886				47.1953	0.0107675				47.112	0.0155889
				20	0.05	63.45	20	46.8045	-0.0241314	46.8811	-0.0189563				47.031	-0.0139761				47.1393	-0.00898921				47.2089	-0.00400924				47.24	0.000950282				47.2327	0.00587599				47.1872	0.0107547				47.1041	0.0155734
				20	0.05	63.5	20	46.7963	-0.024124	46.8729	-0.018952				47.0228	-0.0139747				47.1311	-0.00899068				47.2007	-0.00401359				47.2318	0.000943084				47.2246	0.00586598				47.1792	0.0107419				47.0961	0.0155579
				20	0.05	63.55	20	46.7882	-0.0241167	46.8648	-0.0189477				47.0146	-0.0139733				47.1228	-0.00899215				47.1925	-0.00401794				47.2236	0.000935895				47.2164	0.00585599				47.1712	0.0107292				47.0882	0.0155425
				20	0.05	63.6	20	46.78	-0.0241094	46.8566	-0.0189433				47.0064	-0.0139718				47.1146	-0.00899362				47.1843	-0.00402228				47.2155	0.000928714				47.2083	0.005846				47.1631	0.0107164				47.0803	0.0155271
				20	0.05	63.65	20	46.7719	-0.024102	46.8484	-0.018939				46.9983	-0.0139704				47.1064	-0.00899508				47.1761	-0.00402661				47.2073	0.000921542				47.2002	0.00583603				47.1551	0.0107037				47.0723	0.0155117
				20	0.05	63.7	20	46.7638	-0.0240947	46.8403	-0.0189347				46.9901	-0.013969				47.0982	-0.00899654				47.1679	-0.00403093				47.1992	0.000914379				47.1921	0.00582607				47.1471	0.010691				47.0644	0.0154963
				20	0.05	63.75	20	46.7557	-0.0240874	46.8321	-0.0189304				46.9819	-0.0139675				47.0901	-0.00899799				47.1597	-0.00403525				47.191	0.000907223				47.1841	0.00581612				47.1391	0.0106783				47.0565	0.0154809
				20	0.05	63.8	20	46.7475	-0.0240801	46.824	-0.0189261				46.9737	-0.0139661				47.0819	-0.00899944				47.1516	-0.00403956				47.1829	0.000900077				47.176	0.00580618				47.1311	0.0106656				47.0486	0.0154655
				20	0.05	63.85	20	46.7394	-0.0240728	46.8159	-0.0189218				46.9656	-0.0139647				47.0737	-0.00900089				47.1434	-0.00404387				47.1748	0.000892938				47.1679	0.00579624				47.1231	0.0106529				47.0407	0.0154501
				20	0.05	63.9	20	46.7313	-0.0240655	46.8077	-0.0189175				46.9574	-0.0139633				47.0655	-0.00900233				47.1352	-0.00404817				47.1666	0.000885809				47.1598	0.00578632				47.1151	0.0106403				47.0328	0.0154348
				20	0.05	63.95	20	46.7232	-0.0240582	46.7996	-0.0189131				46.9492	-0.0139618				47.0573	-0.00900377				47.1271	-0.00405247				47.1585	0.000878687				47.1517	0.00577642				47.1071	0.0106276				47.0249	0.0154195
				20	0.05	64	20	46.7151	-0.0240509	46.7915	-0.0189088				46.9411	-0.0139604				47.0492	-0.00900521				47.1189	-0.00405675				47.1504	0.000871574				47.1437	0.00576652				47.0991	0.010615				47.017	0.0154042
				20	0.05	64.05	20	46.707	-0.0240436	46.7834	-0.0189045				46.9329	-0.013959				47.041	-0.00900664				47.1108	-0.00406104				47.1423	0.000864469				47.1356	0.00575663				47.0911	0.0106024				47.0091	0.0153889
				20	0.05	64.1	20	46.6989	-0.0240363	46.7753	-0.0189002				46.9248	-0.0139575				47.0329	-0.00900807				47.1026	-0.00406531				47.1341	0.000857372				47.1276	0.00574675				47.0831	0.0105898				47.0012	0.0153736
				20	0.05	64.15	20	46.6908	-0.024029	46.7672	-0.0188959				46.9166	-0.0139561				47.0247	-0.0090095				47.0945	-0.00406959				47.126	0.000850284				47.1195	0.00573688				47.0752	0.0105772				46.9933	0.0153583
				20	0.05	64.2	20	46.6827	-0.0240217	46.7591	-0.0188916				46.9085	-0.0139547				47.0166	-0.00901092				47.0863	-0.00407385				47.1179	0.000843203				47.1115	0.00572703				47.0672	0.0105646				46.9855	0.0153431
				20	0.05	64.25	20	46.6746	-0.0240144	46.751	-0.0188873				46.9004	-0.0139532				47.0084	-0.00901234				47.0782	-0.00407811				47.1098	0.000836131				47.1034	0.00571718				47.0592	0.010552				46.9776	0.0153278
				20	0.05	64.3	20	46.6666	-0.0240072	46.7429	-0.018883				46.8922	-0.0139518				47.0003	-0.00901375				47.0701	-0.00408236				47.1017	0.000829068				47.0954	0.00570734				47.0512	0.0105394				46.9697	0.0153126
				20	0.05	64.35	20	46.6585	-0.0239999	46.7348	-0.0188787				46.8841	-0.0139503				46.9921	-0.00901516				47.062	-0.00408661				47.0936	0.000822012				47.0873	0.00569752				47.0433	0.0105269				46.9619	0.0152974
				20	0.05	64.4	20	46.6504	-0.0239926	46.7267	-0.0188744				46.876	-0.0139489				46.984	-0.00901657				47.0538	-0.00409085				47.0856	0.000814964				47.0793	0.0056877				47.0353	0.0105144				46.954	0.0152822
				20	0.05	64.45	20	46.6424	-0.0239854	46.7186	-0.0188702				46.8679	-0.0139475				46.9759	-0.00901798				47.0457	-0.00409509				47.0775	0.000807924				47.0713	0.0056779				47.0274	0.0105018				46.9462	0.015267
				20	0.05	64.5	20	46.6343	-0.0239781	46.7105	-0.0188659				46.8598	-0.013946				46.9678	-0.00901938				47.0376	-0.00409932				47.0694	0.000800893				47.0633	0.0056681				47.0194	0.0104893				46.9383	0.0152518
				20	0.05	64.55	20	46.6263	-0.0239709	46.7025	-0.0188616				46.8517	-0.0139446				46.9597	-0.00902078				47.0295	-0.00410354				47.0613	0.000793869				47.0552	0.00565832				47.0115	0.0104768				46.9305	0.0152367
				20	0.05	64.6	20	46.6182	-0.0239636	46.6944	-0.0188573				46.8436	-0.0139431				46.9515	-0.00902217				47.0214	-0.00410776				47.0533	0.000786854				47.0472	0.00564854				47.0036	0.0104643				46.9226	0.0152215
				20	0.05	64.65	20	46.6102	-0.0239564	46.6863	-0.018853				46.8355	-0.0139417				46.9434	-0.00902356				47.0133	-0.00411197				47.0452	0.000779846				47.0392	0.00563878				46.9956	0.0104519				46.9148	0.0152064
				20	0.05	64.7	20	46.6021	-0.0239491	46.6783	-0.0188487				46.8274	-0.0139402				46.9353	-0.00902495				47.0052	-0.00411618				47.0371	0.000772846				47.0312	0.00562902				46.9877	0.0104394				46.907	0.0151913
				20	0.05	64.75	20	46.5941	-0.0239419	46.6702	-0.0188444				46.8193	-0.0139388				46.9272	-0.00902634				46.9972	-0.00412038				47.0291	0.000765855				47.0232	0.00561928				46.9798	0.010427				46.8991	0.0151762
				20	0.05	64.8	20	46.5861	-0.0239347	46.6622	-0.0188401				46.8112	-0.0139373				46.9191	-0.00902772				46.9891	-0.00412458				47.021	0.000758871				47.0152	0.00560954				46.9719	0.0104145				46.8913	0.0151611
				20	0.05	64.85	20	46.578	-0.0239275	46.6541	-0.0188359				46.8032	-0.0139359				46.9111	-0.0090291				46.981	-0.00412877				47.013	0.000751895				47.0072	0.00559982				46.9639	0.0104021				46.8835	0.015146
				20	0.05	64.9	20	46.57	-0.0239202	46.6461	-0.0188316				46.7951	-0.0139344				46.903	-0.00903047				46.9729	-0.00413295				47.005	0.000744926				46.9992	0.0055901				46.956	0.0103897				46.8757	0.015131
				20	0.05	64.95	20	46.562	-0.023913	46.6381	-0.0188273				46.787	-0.013933				46.8949	-0.00903184				46.9649	-0.00413713				46.9969	0.000737966				46.9913	0.0055804				46.9481	0.0103773				46.8679	0.0151159
				20	0.05	65	20	46.554	-0.0239058	46.63	-0.018823				46.779	-0.0139315				46.8868	-0.00903321				46.9568	-0.00414131				46.9889	0.000731013				46.9833	0.0055707				46.9402	0.0103649				46.8601	0.0151009
				20	0.05	65.05	20	46.546	-0.0238986	46.622	-0.0188188				46.7709	-0.0139301				46.8788	-0.00903458				46.9487	-0.00414548				46.9809	0.000724068				46.9753	0.00556101				46.9323	0.0103525				46.8523	0.0150859
				20	0.05	65.1	20	46.538	-0.0238914	46.614	-0.0188145				46.7628	-0.0139286				46.8707	-0.00903594				46.9407	-0.00414964				46.9729	0.000717131				46.9674	0.00555134				46.9244	0.0103401				46.8445	0.0150709
				20	0.05	65.15	20	46.53	-0.0238842	46.606	-0.0188102				46.7548	-0.0139272				46.8626	-0.0090373				46.9326	-0.0041538				46.9648	0.000710201				46.9594	0.00554167				46.9165	0.0103278				46.8367	0.0150559
				20	0.05	65.2	20	46.522	-0.023877	46.598	-0.018806				46.7468	-0.0139257				46.8546	-0.00903866				46.9246	-0.00415795				46.9568	0.00070328				46.9514	0.00553202				46.9087	0.0103154				46.8289	0.0150409
				20	0.05	65.25	20	46.514	-0.0238698	46.59	-0.0188017				46.7387	-0.0139243				46.8465	-0.00904001				46.9166	-0.00416209				46.9488	0.000696365				46.9435	0.00552237				46.9008	0.0103031				46.8211	0.0150259
				20	0.05	65.3	20	46.506	-0.0238626	46.582	-0.0187974				46.7307	-0.0139228				46.8385	-0.00904136				46.9085	-0.00416623				46.9408	0.000689459				46.9355	0.00551273				46.8929	0.0102908				46.8133	0.015011
				20	0.05	65.35	20	46.498	-0.0238554	46.574	-0.0187932				46.7227	-0.0139214				46.8304	-0.00904271				46.9005	-0.00417037				46.9328	0.00068256				46.9276	0.00550311				46.885	0.0102785				46.8055	0.014996
				20	0.05	65.4	20	46.4901	-0.0238482	46.566	-0.0187889				46.7146	-0.0139199				46.8224	-0.00904405				46.8925	-0.0041745				46.9248	0.000675668				46.9196	0.00549349				46.8772	0.0102662				46.7978	0.0149811
				20	0.05	65.45	20	46.4821	-0.0238411	46.558	-0.0187846				46.7066	-0.0139184				46.8144	-0.00904539				46.8844	-0.00417862				46.9168	0.000668784				46.9117	0.00548388				46.8693	0.0102539				46.79	0.0149662
				20	0.05	65.5	20	46.4741	-0.0238339	46.55	-0.0187804				46.6986	-0.013917				46.8064	-0.00904673				46.8764	-0.00418274				46.9088	0.000661908				46.9038	0.00547428				46.8615	0.0102416				46.7822	0.0149513
				20	0.05	65.55	20	46.4662	-0.0238267	46.542	-0.0187761				46.6906	-0.0139155				46.7983	-0.00904806				46.8684	-0.00418686				46.9009	0.000655039				46.8958	0.00546469				46.8536	0.0102293				46.7745	0.0149364
				20	0.05	65.6	20	46.4582	-0.0238196	46.5341	-0.0187719				46.6826	-0.0139141				46.7903	-0.00904939				46.8604	-0.00419097				46.8929	0.000648177				46.8879	0.00545511				46.8458	0.0102171				46.7667	0.0149215
				20	0.05	65.65	20	46.4503	-0.0238124	46.5261	-0.0187676				46.6746	-0.0139126				46.7823	-0.00905072				46.8524	-0.00419507				46.8849	0.000641323				46.88	0.00544555				46.8379	0.0102048				46.759	0.0149067
				20	0.05	65.7	20	46.4423	-0.0238052	46.5181	-0.0187634				46.6666	-0.0139111				46.7743	-0.00905205				46.8444	-0.00419917				46.877	0.000634476				46.8721	0.00543598				46.8301	0.0101926				46.7512	0.0148918
				20	0.05	65.75	20	46.4344	-0.0237981	46.5102	-0.0187591				46.6586	-0.0139097				46.7663	-0.00905337				46.8364	-0.00420326				46.869	0.000627637				46.8642	0.00542643				46.8222	0.0101804				46.7435	0.014877
				20	0.05	65.8	20	46.4265	-0.0237909	46.5022	-0.0187549				46.6506	-0.0139082				46.7583	-0.00905469				46.8284	-0.00420735				46.861	0.000620805				46.8563	0.00541689				46.8144	0.0101682				46.7358	0.0148622
				20	0.05	65.85	20	46.4185	-0.0237838	46.4943	-0.0187506				46.6426	-0.0139067				46.7503	-0.009056				46.8204	-0.00421143				46.8531	0.000613981				46.8484	0.00540736				46.8066	0.010156				46.728	0.0148474
				20	0.05	65.9	20	46.4106	-0.0237767	46.4863	-0.0187464				46.6346	-0.0139053				46.7423	-0.00905732				46.8125	-0.00421551				46.8451	0.000607163				46.8405	0.00539784				46.7988	0.0101438				46.7203	0.0148326
				20	0.05	65.95	20	46.4027	-0.0237695	46.4784	-0.0187421				46.6267	-0.0139038				46.7343	-0.00905863				46.8045	-0.00421958				46.8372	0.000600353				46.8326	0.00538832				46.7909	0.0101316				46.7126	0.0148178
				20	0.05	66	20	46.3947	-0.0237624	46.4705	-0.0187379				46.6187	-0.0139024				46.7263	-0.00905994				46.7965	-0.00422365				46.8293	0.000593551				46.8247	0.00537882				46.7831	0.0101195				46.7049	0.014803
				20	0.05	66.05	20	46.3868	-0.0237553	46.4625	-0.0187336				46.6107	-0.0139009				46.7184	-0.00906124				46.7885	-0.00422771				46.8213	0.000586755				46.8168	0.00536932				46.7753	0.0101073				46.6971	0.0147883
				20	0.05	66.1	20	46.3789	-0.0237482	46.4546	-0.0187294				46.6028	-0.0138994				46.7104	-0.00906254				46.7806	-0.00423177				46.8134	0.000579967				46.809	0.00535984				46.7675	0.0100952				46.6894	0.0147735
				20	0.05	66.15	20	46.371	-0.023741	46.4467	-0.0187252				46.5948	-0.013898				46.7024	-0.00906384				46.7726	-0.00423582				46.8055	0.000573186				46.8011	0.00535036				46.7597	0.0100831				46.6817	0.0147588
				20	0.05	66.2	20	46.3631	-0.0237339	46.4388	-0.0187209				46.5869	-0.0138965				46.6945	-0.00906514				46.7647	-0.00423987				46.7975	0.000566412				46.7932	0.00534089				46.7519	0.0100709				46.674	0.0147441
				20	0.05	66.25	20	46.3552	-0.0237268	46.4309	-0.0187167				46.5789	-0.013895				46.6865	-0.00906643				46.7567	-0.00424391				46.7896	0.000559645				46.7853	0.00533144				46.7441	0.0100588				46.6663	0.0147294
				20	0.05	66.3	20	46.3473	-0.0237197	46.4229	-0.0187125				46.571	-0.0138935				46.6786	-0.00906772				46.7488	-0.00424795				46.7817	0.000552886				46.7775	0.00532199				46.7363	0.0100467				46.6586	0.0147147
				20	0.05	66.35	20	46.3394	-0.0237126	46.415	-0.0187082				46.563	-0.0138921				46.6706	-0.00906901				46.7408	-0.00425198				46.7738	0.000546133				46.7696	0.00531255				46.7286	0.0100346				46.6509	0.0147
				20	0.05	66.4	20	46.3316	-0.0237055	46.4071	-0.018704				46.5551	-0.0138906				46.6627	-0.00907029				46.7329	-0.004256				46.7659	0.000539388				46.7618	0.00530312				46.7208	0.0100226				46.6433	0.0146853
				20	0.05	66.45	20	46.3237	-0.0236984	46.3992	-0.0186998				46.5472	-0.0138891				46.6547	-0.00907157				46.725	-0.00426003				46.758	0.000532649				46.7539	0.00529369				46.713	0.0100105				46.6356	0.0146707
				20	0.05	66.5	20	46.3158	-0.0236913	46.3914	-0.0186955				46.5393	-0.0138877				46.6468	-0.00907285				46.7171	-0.00426404				46.7501	0.000525918				46.7461	0.00528428				46.7052	0.00999846				46.6279	0.014656
				20	0.05	66.55	20	46.3079	-0.0236842	46.3835	-0.0186913				46.5313	-0.0138862				46.6389	-0.00907413				46.7091	-0.00426805				46.7422	0.000519194				46.7383	0.00527488				46.6975	0.00998641				46.6202	0.0146414
				20	0.05	66.6	20	46.3001	-0.0236771	46.3756	-0.0186871				46.5234	-0.0138847				46.6309	-0.0090754				46.7012	-0.00427206				46.7343	0.000512476				46.7304	0.00526548				46.6897	0.00997438				46.6126	0.0146268
				20	0.05	66.65	20	46.2922	-0.0236701	46.3677	-0.0186829				46.5155	-0.0138832				46.623	-0.00907667				46.6933	-0.00427606				46.7265	0.000505766				46.7226	0.0052561				46.682	0.00996236				46.6049	0.0146122
				20	0.05	66.7	20	46.2844	-0.023663	46.3598	-0.0186787				46.5076	-0.0138818				46.6151	-0.00907794				46.6854	-0.00428006				46.7186	0.000499062				46.7148	0.00524672				46.6742	0.00995035				46.5972	0.0145976
				20	0.05	66.75	20	46.2765	-0.0236559	46.352	-0.0186744				46.4997	-0.0138803				46.6072	-0.00907921				46.6775	-0.00428405				46.7107	0.000492366				46.7069	0.00523735				46.6665	0.00993835				46.5896	0.014583
				20	0.05	66.8	20	46.2687	-0.0236489	46.3441	-0.0186702				46.4918	-0.0138788				46.5993	-0.00908047				46.6696	-0.00428804				46.7028	0.000485676				46.6991	0.00522799				46.6587	0.00992637				46.5819	0.0145685
				20	0.05	66.85	20	46.2608	-0.0236418	46.3363	-0.018666				46.4839	-0.0138773				46.5914	-0.00908173				46.6617	-0.00429202				46.695	0.000478993				46.6913	0.00521864				46.651	0.00991439				46.5743	0.0145539
				20	0.05	66.9	20	46.253	-0.0236347	46.3284	-0.0186618				46.476	-0.0138759				46.5835	-0.00908299				46.6538	-0.004296				46.6871	0.000472318				46.6835	0.0052093				46.6432	0.00990242				46.5666	0.0145394
				20	0.05	66.95	20	46.2452	-0.0236277	46.3205	-0.0186576				46.4681	-0.0138744				46.5756	-0.00908424				46.6459	-0.00429997				46.6793	0.000465648				46.6757	0.00519996				46.6355	0.00989047				46.559	0.0145248
				20	0.05	67	20	46.2373	-0.0236206	46.3127	-0.0186534				46.4603	-0.0138729				46.5677	-0.00908549				46.6381	-0.00430394				46.6714	0.000458986				46.6679	0.00519064				46.6278	0.00987852				46.5514	0.0145103
				20	0.05	67.05	20	46.2295	-0.0236136	46.3049	-0.0186492				46.4524	-0.0138714				46.5598	-0.00908674				46.6302	-0.0043079				46.6636	0.000452331				46.6601	0.00518132				46.6201	0.00986659				46.5437	0.0144958
				20	0.05	67.1	20	46.2217	-0.0236066	46.297	-0.018645				46.4445	-0.01387				46.5519	-0.00908799				46.6223	-0.00431186				46.6557	0.000445682				46.6523	0.00517202				46.6123	0.00985466				46.5361	0.0144813
				20	0.05	67.15	20	46.2139	-0.0235995	46.2892	-0.0186408				46.4367	-0.0138685				46.544	-0.00908923				46.6144	-0.00431582				46.6479	0.00043904				46.6445	0.00516272				46.6046	0.00984275				46.5285	0.0144668
				20	0.05	67.2	20	46.2061	-0.0235925	46.2814	-0.0186366				46.4288	-0.013867				46.5362	-0.00909047				46.6066	-0.00431977				46.6401	0.000432405				46.6368	0.00515343				46.5969	0.00983084				46.5209	0.0144524
				20	0.05	67.25	20	46.1983	-0.0235855	46.2735	-0.0186324				46.4209	-0.0138655				46.5283	-0.00909171				46.5987	-0.00432371				46.6322	0.000425776				46.629	0.00514415				46.5892	0.00981895				46.5133	0.0144379
				20	0.05	67.3	20	46.1905	-0.0235784	46.2657	-0.0186282				46.4131	-0.013864				46.5204	-0.00909295				46.5909	-0.00432765				46.6244	0.000419155				46.6212	0.00513488				46.5815	0.00980707				46.5057	0.0144235
				20	0.05	67.35	20	46.1827	-0.0235714	46.2579	-0.018624				46.4052	-0.0138626				46.5126	-0.00909418				46.583	-0.00433159				46.6166	0.000412539				46.6134	0.00512561				46.5738	0.0097952				46.4981	0.014409
				20	0.05	67.4	20	46.1749	-0.0235644	46.2501	-0.0186198				46.3974	-0.0138611				46.5047	-0.00909541				46.5752	-0.00433552				46.6088	0.000405931				46.6057	0.00511636				46.5661	0.00978333				46.4905	0.0143946
				20	0.05	67.45	20	46.1671	-0.0235574	46.2423	-0.0186156				46.3896	-0.0138596				46.4969	-0.00909664				46.5673	-0.00433944				46.601	0.000399329				46.5979	0.00510711				46.5584	0.00977148				46.4829	0.0143802
				20	0.05	67.5	20	46.1593	-0.0235504	46.2345	-0.0186114				46.3817	-0.0138581				46.489	-0.00909787				46.5595	-0.00434336				46.5932	0.000392734				46.5902	0.00509787				46.5508	0.00975964				46.4753	0.0143658
				20	0.05	67.55	20	46.1515	-0.0235434	46.2267	-0.0186072				46.3739	-0.0138566				46.4812	-0.00909909				46.5517	-0.00434728				46.5854	0.000386145				46.5824	0.00508864				46.5431	0.00974781				46.4677	0.0143514
				20	0.05	67.6	20	46.1437	-0.0235364	46.2189	-0.018603				46.3661	-0.0138552				46.4734	-0.00910031				46.5438	-0.00435119				46.5776	0.000379563				46.5747	0.00507942				46.5354	0.00973599				46.4601	0.0143371
				20	0.05	67.65	20	46.136	-0.0235294	46.2111	-0.0185988				46.3582	-0.0138537				46.4655	-0.00910153				46.536	-0.0043551				46.5698	0.000372987				46.5669	0.00507021				46.5277	0.00972418				46.4525	0.0143227
				20	0.05	67.7	20	46.1282	-0.0235224	46.2033	-0.0185947				46.3504	-0.0138522				46.4577	-0.00910274				46.5282	-0.004359				46.562	0.000366418				46.5592	0.005061				46.5201	0.00971238				46.445	0.0143083
				20	0.05	67.75	20	46.1204	-0.0235154	46.1956	-0.0185905				46.3426	-0.0138507				46.4499	-0.00910396				46.5204	-0.0043629				46.5542	0.000359855				46.5515	0.00505181				46.5124	0.00970059				46.4374	0.014294
				20	0.05	67.8	20	46.1127	-0.0235084	46.1878	-0.0185863				46.3348	-0.0138492				46.4421	-0.00910517				46.5126	-0.0043668				46.5464	0.000353299				46.5437	0.00504262				46.5048	0.00968881				46.4298	0.0142797
				20	0.05	67.85	20	46.1049	-0.0235014	46.18	-0.0185821				46.327	-0.0138477				46.4342	-0.00910638				46.5048	-0.00437069				46.5386	0.00034675				46.536	0.00503344				46.4971	0.00967703				46.4223	0.0142654
				20	0.05	67.9	20	46.0972	-0.0234944	46.1722	-0.0185779				46.3192	-0.0138462				46.4264	-0.00910758				46.497	-0.00437457				46.5309	0.000340207				46.5283	0.00502427				46.4895	0.00966527				46.4147	0.0142511
				20	0.05	67.95	20	46.0894	-0.0234875	46.1645	-0.0185738				46.3114	-0.0138448				46.4186	-0.00910879				46.4892	-0.00437845				46.5231	0.00033367				46.5206	0.00501511				46.4818	0.00965352				46.4071	0.0142368
				20	0.05	68	20	46.0817	-0.0234805	46.1567	-0.0185696				46.3036	-0.0138433				46.4108	-0.00910999				46.4814	-0.00438233				46.5153	0.000327139				46.5129	0.00500595				46.4742	0.00964178				46.3996	0.0142225
				20	0.05	68.05	20	46.074	-0.0234735	46.149	-0.0185654				46.2958	-0.0138418				46.403	-0.00911119				46.4736	-0.0043862				46.5076	0.000320615				46.5052	0.0049968				46.4665	0.00963005				46.392	0.0142082
				20	0.05	68.1	20	46.0662	-0.0234666	46.1412	-0.0185612				46.2881	-0.0138403				46.3952	-0.00911238				46.4658	-0.00439007				46.4998	0.000314098				46.4975	0.00498767				46.4589	0.00961833				46.3845	0.014194
				20	0.05	68.15	20	46.0585	-0.0234596	46.1335	-0.0185571				46.2803	-0.0138388				46.3874	-0.00911358				46.458	-0.00439393				46.4921	0.000307587				46.4898	0.00497854				46.4513	0.00960662				46.377	0.0141797
				20	0.05	68.2	20	46.0508	-0.0234527	46.1258	-0.0185529				46.2725	-0.0138373				46.3797	-0.00911477				46.4503	-0.00439779				46.4843	0.000301082				46.4821	0.00496941				46.4437	0.00959492				46.3694	0.0141655
				20	0.05	68.25	20	46.0431	-0.0234457	46.118	-0.0185487				46.2647	-0.0138358				46.3719	-0.00911596				46.4425	-0.00440164				46.4766	0.000294583				46.4744	0.0049603				46.436	0.00958323				46.3619	0.0141513
				20	0.05	68.3	20	46.0354	-0.0234388	46.1103	-0.0185446				46.257	-0.0138344				46.3641	-0.00911714				46.4347	-0.00440549				46.4689	0.000288091				46.4667	0.0049512				46.4284	0.00957155				46.3544	0.0141371
				20	0.05	68.35	20	46.0276	-0.0234318	46.1026	-0.0185404				46.2492	-0.0138329				46.3563	-0.00911833				46.427	-0.00440934				46.4611	0.000281604				46.459	0.0049421				46.4208	0.00955988				46.3469	0.0141229
				20	0.05	68.4	20	46.0199	-0.0234249	46.0948	-0.0185363				46.2415	-0.0138314				46.3486	-0.00911951				46.4192	-0.00441318				46.4534	0.000275125				46.4513	0.00493301				46.4132	0.00954822				46.3393	0.0141087
				20	0.05	68.45	20	46.0122	-0.0234179	46.0871	-0.0185321				46.2337	-0.0138299				46.3408	-0.00912069				46.4115	-0.00441701				46.4457	0.000268651				46.4437	0.00492393				46.4056	0.00953657				46.3318	0.0140945
				20	0.05	68.5	20	46.0045	-0.023411	46.0794	-0.018528				46.226	-0.0138284				46.3331	-0.00912187				46.4037	-0.00442085				46.438	0.000262184				46.436	0.00491485				46.398	0.00952493				46.3243	0.0140803
				20	0.05	68.55	20	45.9969	-0.0234041	46.0717	-0.0185238				46.2182	-0.0138269				46.3253	-0.00912304				46.396	-0.00442468				46.4303	0.000255723				46.4283	0.00490579				46.3904	0.0095133				46.3168	0.0140662
				20	0.05	68.6	20	45.9892	-0.0233972	46.064	-0.0185196				46.2105	-0.0138254				46.3176	-0.00912421				46.3882	-0.0044285				46.4225	0.000249267				46.4207	0.00489673				46.3828	0.00950168				46.3093	0.0140521
				20	0.05	68.65	20	45.9815	-0.0233902	46.0563	-0.0185155				46.2028	-0.0138239				46.3098	-0.00912538				46.3805	-0.00443232				46.4148	0.000242819				46.413	0.00488768				46.3752	0.00949006				46.3018	0.0140379
				20	0.05	68.7	20	45.9738	-0.0233833	46.0486	-0.0185113				46.195	-0.0138225				46.3021	-0.00912655				46.3728	-0.00443613				46.4071	0.000236376				46.4054	0.00487864				46.3677	0.00947846				46.2943	0.0140238
				20	0.05	68.75	20	45.9661	-0.0233764	46.0409	-0.0185072				46.1873	-0.013821				46.2943	-0.00912772				46.365	-0.00443995				46.3994	0.000229939				46.3977	0.00486961				46.3601	0.00946687				46.2869	0.0140097
				20	0.05	68.8	20	45.9585	-0.0233695	46.0332	-0.0185031				46.1796	-0.0138195				46.2866	-0.00912888				46.3573	-0.00444375				46.3918	0.000223509				46.3901	0.00486058				46.3525	0.00945528				46.2794	0.0139956
				20	0.05	68.85	20	45.9508	-0.0233626	46.0255	-0.0184989				46.1719	-0.013818				46.2789	-0.00913004				46.3496	-0.00444756				46.3841	0.000217085				46.3824	0.00485157				46.3449	0.00944371				46.2719	0.0139815
				20	0.05	68.9	20	45.9431	-0.0233557	46.0179	-0.0184948				46.1642	-0.0138165				46.2712	-0.0091312				46.3419	-0.00445135				46.3764	0.000210666				46.3748	0.00484256				46.3374	0.00943215				46.2644	0.0139674
				20	0.05	68.95	20	45.9355	-0.0233488	46.0102	-0.0184906				46.1565	-0.013815				46.2634	-0.00913236				46.3342	-0.00445515				46.3687	0.000204254				46.3672	0.00483355				46.3298	0.00942059				46.2569	0.0139534
				20	0.05	69	20	45.9278	-0.0233419	46.0025	-0.0184865				46.1488	-0.0138135				46.2557	-0.00913352				46.3265	-0.00445894				46.361	0.000197848				46.3595	0.00482456				46.3223	0.00940905				46.2495	0.0139393
				20	0.05	69.05	20	45.9202	-0.023335	45.9949	-0.0184824				46.1411	-0.013812				46.248	-0.00913467				46.3188	-0.00446272				46.3534	0.000191447				46.3519	0.00481557				46.3147	0.00939751				46.242	0.0139253
				20	0.05	69.1	20	45.9125	-0.0233282	45.9872	-0.0184782				46.1334	-0.0138105				46.2403	-0.00913582				46.3111	-0.00446651				46.3457	0.000185053				46.3443	0.0048066				46.3072	0.00938599				46.2346	0.0139113
				20	0.05	69.15	20	45.9049	-0.0233213	45.9795	-0.0184741				46.1257	-0.013809				46.2326	-0.00913697				46.3034	-0.00447028				46.338	0.000178665				46.3367	0.00479763				46.2996	0.00937447				46.2271	0.0138972
				20	0.05	69.2	20	45.8973	-0.0233144	45.9719	-0.01847				46.118	-0.0138075				46.2249	-0.00913811				46.2957	-0.00447406				46.3304	0.000172283				46.3291	0.00478866				46.2921	0.00936296				46.2197	0.0138832
				20	0.05	69.25	20	45.8896	-0.0233075	45.9642	-0.0184658				46.1103	-0.0138061				46.2172	-0.00913926				46.288	-0.00447783				46.3227	0.000165906				46.3215	0.00477971				46.2845	0.00935147				46.2122	0.0138692
				20	0.05	69.3	20	45.882	-0.0233007	45.9566	-0.0184617				46.1027	-0.0138046				46.2095	-0.0091404				46.2803	-0.00448159				46.3151	0.000159536				46.3139	0.00477076				46.277	0.00933998				46.2048	0.0138553
				20	0.05	69.35	20	45.8744	-0.0232938	45.949	-0.0184576				46.095	-0.0138031				46.2019	-0.00914154				46.2727	-0.00448536				46.3074	0.000153172				46.3063	0.00476182				46.2695	0.0093285				46.1973	0.0138413
				20	0.05	69.4	20	45.8668	-0.0232869	45.9413	-0.0184535				46.0873	-0.0138016				46.1942	-0.00914268				46.265	-0.00448911				46.2998	0.000146813				46.2987	0.00475289				46.262	0.00931703				46.1899	0.0138273
				20	0.05	69.45	20	45.8592	-0.0232801	45.9337	-0.0184493				46.0797	-0.0138001				46.1865	-0.00914381				46.2573	-0.00449287				46.2922	0.00014046				46.2911	0.00474396				46.2544	0.00930557				46.1825	0.0138134
				20	0.05	69.5	20	45.8515	-0.0232732	45.9261	-0.0184452				46.072	-0.0137986				46.1788	-0.00914494				46.2497	-0.00449662				46.2845	0.000134114				46.2835	0.00473505				46.2469	0.00929412				46.175	0.0137994
				20	0.05	69.55	20	45.8439	-0.0232664	45.9185	-0.0184411				46.0643	-0.0137971				46.1712	-0.00914608				46.242	-0.00450036				46.2769	0.000127773				46.276	0.00472614				46.2394	0.00928268				46.1676	0.0137855
				20	0.05	69.6	20	45.8363	-0.0232595	45.9108	-0.018437				46.0567	-0.0137956				46.1635	-0.0091472				46.2344	-0.0045041				46.2693	0.000121437				46.2684	0.00471724				46.2319	0.00927124				46.1602	0.0137716
				20	0.05	69.65	20	45.8287	-0.0232527	45.9032	-0.0184329				46.049	-0.0137941				46.1559	-0.00914833				46.2267	-0.00450784				46.2616	0.000115108				46.2608	0.00470834				46.2244	0.00925982				46.1528	0.0137577
				20	0.05	69.7	20	45.8212	-0.0232459	45.8956	-0.0184288				46.0414	-0.0137926				46.1482	-0.00914946				46.2191	-0.00451157				46.254	0.000108785				46.2532	0.00469946				46.2169	0.00924841				46.1454	0.0137438
				20	0.05	69.75	20	45.8136	-0.023239	45.888	-0.0184246				46.0338	-0.0137911				46.1406	-0.00915058				46.2114	-0.0045153				46.2464	0.000102467				46.2457	0.00469058				46.2094	0.009237				46.138	0.0137299
				20	0.05	69.8	20	45.806	-0.0232322	45.8804	-0.0184205				46.0261	-0.0137896				46.1329	-0.0091517				46.2038	-0.00451903				46.2388	9.61548e-05				46.2381	0.00468171				46.2019	0.00922561				46.1306	0.013716
				20	0.05	69.85	20	45.7984	-0.0232254	45.8728	-0.0184164				46.0185	-0.0137881				46.1253	-0.00915282				46.1962	-0.00452275				46.2312	8.98486e-05				46.2306	0.00467284				46.1945	0.00921422				46.1232	0.0137021
				20	0.05	69.9	20	45.7908	-0.0232186	45.8652	-0.0184123				46.0109	-0.0137866				46.1176	-0.00915393				46.1885	-0.00452647				46.2236	8.35481e-05				46.223	0.00466399				46.187	0.00920284				46.1158	0.0136883
				20	0.05	69.95	20	45.7833	-0.0232117	45.8576	-0.0184082				46.0033	-0.0137851				46.11	-0.00915505				46.1809	-0.00453018				46.216	7.72533e-05				46.2155	0.00465514				46.1795	0.00919148				46.1084	0.0136744
				20	0.05	70	20	45.7757	-0.0232049	45.8501	-0.0184041				45.9957	-0.0137837				46.1024	-0.00915616				46.1733	-0.00453389				46.2084	7.09643e-05				46.2079	0.0046463				46.172	0.00918012				46.101	0.0136606
				20	0.05	70.05	20	45.7681	-0.0231981	45.8425	-0.0184				45.988	-0.0137822				46.0948	-0.00915727				46.1657	-0.0045376				46.2009	6.46809e-05				46.2004	0.00463746				46.1646	0.00916877				46.0936	0.0136468
				20	0.05	70.1	20	45.7606	-0.0231913	45.8349	-0.0183959				45.9804	-0.0137807				46.0871	-0.00915838				46.1581	-0.0045413				46.1933	5.84032e-05				46.1929	0.00462863				46.1571	0.00915743				46.0863	0.013633
				20	0.05	70.15	20	45.753	-0.0231845	45.8273	-0.0183918				45.9728	-0.0137792				46.0795	-0.00915949				46.1505	-0.004545				46.1857	5.21311e-05				46.1853	0.00461982				46.1496	0.00914609				46.0789	0.0136192
				20	0.05	70.2	20	45.7455	-0.0231777	45.8198	-0.0183877				45.9652	-0.0137777				46.0719	-0.00916059				46.1429	-0.00454869				46.1781	4.58647e-05				46.1778	0.004611				46.1422	0.00913477				46.0715	0.0136054
				20	0.05	70.25	20	45.7379	-0.0231709	45.8122	-0.0183836				45.9576	-0.0137762				46.0643	-0.00916169				46.1353	-0.00455238				46.1706	3.96039e-05				46.1703	0.0046022				46.1347	0.00912346				46.0642	0.0135916
				20	0.05	70.3	20	45.7304	-0.0231641	45.8047	-0.0183795				45.9501	-0.0137747				46.0567	-0.0091628				46.1277	-0.00455607				46.163	3.33487e-05				46.1628	0.0045934				46.1273	0.00911215				46.0568	0.0135778
				20	0.05	70.35	20	45.7229	-0.0231574	45.7971	-0.0183755				45.9425	-0.0137732				46.0491	-0.00916389				46.1201	-0.00455975				46.1554	2.70991e-05				46.1553	0.00458461				46.1198	0.00910086				46.0494	0.0135641
				20	0.05	70.4	20	45.7153	-0.0231506	45.7896	-0.0183714				45.9349	-0.0137717				46.0415	-0.00916499				46.1125	-0.00456343				46.1479	2.08551e-05				46.1478	0.00457583				46.1124	0.00908957				46.0421	0.0135503
				20	0.05	70.45	20	45.7078	-0.0231438	45.782	-0.0183673				45.9273	-0.0137702				46.0339	-0.00916609				46.1049	-0.00456711				46.1403	1.46166e-05				46.1403	0.00456705				46.105	0.00907829				46.0347	0.0135366
				20	0.05	70.5	20	45.7003	-0.023137	45.7745	-0.0183632				45.9197	-0.0137687				46.0264	-0.00916718				46.0974	-0.00457078				46.1328	8.38369e-06				46.1328	0.00455829				46.0975	0.00906702				46.0274	0.0135228
				20	0.05	70.55	20	45.6928	-0.0231302	45.7669	-0.0183591				45.9122	-0.0137672				46.0188	-0.00916827				46.0898	-0.00457445				46.1252	2.15632e-06				46.1253	0.00454952				46.0901	0.00905576				46.0201	0.0135091
				20	0.05	70.6	20	45.6852	-0.0231235	45.7594	-0.018355				45.9046	-0.0137657				46.0112	-0.00916936				46.0822	-0.00457811				46.1177	-4.06554e-06				46.1178	0.00454077				46.0827	0.00904451				46.0127	0.0134954
				20	0.05	70.65	20	45.6777	-0.0231167	45.7519	-0.018351				45.897	-0.0137642				46.0036	-0.00917045				46.0747	-0.00458177				46.1102	-1.02819e-05				46.1103	0.00453202				46.0753	0.00903327				46.0054	0.0134817
				20	0.05	70.7	20	45.6702	-0.02311	45.7444	-0.0183469				45.8895	-0.0137627				45.9961	-0.00917153				46.0671	-0.00458543				46.1026	-1.64928e-05				46.1028	0.00452329				46.0678	0.00902203				45.9981	0.013468
				20	0.05	70.75	20	45.6627	-0.0231032	45.7368	-0.0183428				45.8819	-0.0137612				45.9885	-0.00917261				46.0595	-0.00458908				46.0951	-2.26982e-05				46.0953	0.00451455				46.0604	0.00901081				45.9907	0.0134544
				20	0.05	70.8	20	45.6552	-0.0230964	45.7293	-0.0183387				45.8744	-0.0137597				45.9809	-0.0091737				46.052	-0.00459273				46.0876	-2.88981e-05				46.0879	0.00450583				46.053	0.00899959				45.9834	0.0134407
				20	0.05	70.85	20	45.6477	-0.0230897	45.7218	-0.0183347				45.8669	-0.0137582				45.9734	-0.00917477				46.0444	-0.00459638				46.0801	-3.50926e-05				46.0804	0.00449711				46.0456	0.00898838				45.9761	0.013427
				20	0.05	70.9	20	45.6402	-0.023083	45.7143	-0.0183306				45.8593	-0.0137567				45.9658	-0.00917585				46.0369	-0.00460002				46.0726	-4.12816e-05				46.0729	0.0044884				46.0382	0.00897718				45.9688	0.0134134
				20	0.05	70.95	20	45.6328	-0.0230762	45.7068	-0.0183265				45.8518	-0.0137552				45.9583	-0.00917693				46.0294	-0.00460366				46.065	-4.74653e-05				46.0655	0.0044797				46.0308	0.00896599				45.9615	0.0133997
				20	0.05	71	20	45.6253	-0.0230695	45.6993	-0.0183225				45.8443	-0.0137537				45.9507	-0.009178				46.0218	-0.00460729				46.0575	-5.36435e-05				46.058	0.004471				46.0234	0.00895481				45.9542	0.0133861
				20	0.05	71.05	20	45.6178	-0.0230627	45.6918	-0.0183184				45.8367	-0.0137523				45.9432	-0.00917907				46.0143	-0.00461092				46.05	-5.98164e-05				46.0506	0.00446231				46.0161	0.00894364				45.9469	0.0133725
				20	0.05	71.1	20	45.6103	-0.023056	45.6843	-0.0183143				45.8292	-0.0137508				45.9357	-0.00918014				46.0068	-0.00461455				46.0425	-6.59839e-05				46.0431	0.00445363				46.0087	0.00893247				45.9396	0.0133589
				20	0.05	71.15	20	45.6029	-0.0230493	45.6768	-0.0183103				45.8217	-0.0137493				45.9282	-0.00918121				45.9993	-0.00461817				46.0351	-7.2146e-05				46.0357	0.00444495				46.0013	0.00892132				45.9323	0.0133453
				20	0.05	71.2	20	45.5954	-0.0230426	45.6694	-0.0183062				45.8142	-0.0137478				45.9206	-0.00918228				45.9917	-0.00462179				46.0276	-7.83028e-05				46.0282	0.00443628				45.9939	0.00891017				45.925	0.0133317
				20	0.05	71.25	20	45.5879	-0.0230359	45.6619	-0.0183022				45.8067	-0.0137463				45.9131	-0.00918334				45.9842	-0.00462541				46.0201	-8.44542e-05				46.0208	0.00442762				45.9866	0.00889903				45.9177	0.0133181
				20	0.05	71.3	20	45.5805	-0.0230291	45.6544	-0.0182981				45.7992	-0.0137448				45.9056	-0.00918441				45.9767	-0.00462902				46.0126	-9.06003e-05				46.0133	0.00441897				45.9792	0.0088879				45.9105	0.0133046
				20	0.05	71.35	20	45.573	-0.0230224	45.6469	-0.0182941				45.7917	-0.0137433				45.8981	-0.00918547				45.9692	-0.00463263				46.0051	-9.67412e-05				46.0059	0.00441032				45.9718	0.00887678				45.9032	0.013291
				20	0.05	71.4	20	45.5656	-0.0230157	45.6395	-0.01829				45.7842	-0.0137418				45.8906	-0.00918653				45.9617	-0.00463624				45.9977	-0.000102877				45.9985	0.00440168				45.9645	0.00886567				45.8959	0.0132775
				20	0.05	71.45	20	45.5581	-0.023009	45.632	-0.018286				45.7767	-0.0137403				45.8831	-0.00918759				45.9542	-0.00463984				45.9902	-0.000109007				45.9911	0.00439305				45.9571	0.00885456				45.8886	0.0132639
				20	0.05	71.5	20	45.5507	-0.0230023	45.6246	-0.0182819				45.7692	-0.0137388				45.8756	-0.00918864				45.9467	-0.00464344				45.9827	-0.000115132				45.9837	0.00438442				45.9498	0.00884347				45.8814	0.0132504
				20	0.05	71.55	20	45.5433	-0.0229956	45.6171	-0.0182779				45.7617	-0.0137373				45.8681	-0.0091897				45.9392	-0.00464704				45.9753	-0.000121252				45.9763	0.0043758				45.9424	0.00883238				45.8741	0.0132369
				20	0.05	71.6	20	45.5358	-0.0229889	45.6097	-0.0182738				45.7542	-0.0137358				45.8606	-0.00919075				45.9318	-0.00465063				45.9678	-0.000127366				45.9688	0.00436719				45.9351	0.0088213				45.8669	0.0132234
				20	0.05	71.65	20	45.5284	-0.0229822	45.6022	-0.0182698				45.7468	-0.0137343				45.8531	-0.0091918				45.9243	-0.00465422				45.9604	-0.000133476				45.9614	0.00435858				45.9278	0.00881023				45.8596	0.0132099
				20	0.05	71.7	20	45.521	-0.0229756	45.5948	-0.0182658				45.7393	-0.0137328				45.8456	-0.00919285				45.9168	-0.0046578				45.9529	-0.00013958				45.954	0.00434998				45.9204	0.00879917				45.8524	0.0131964
				20	0.05	71.75	20	45.5136	-0.0229689	45.5874	-0.0182617				45.7318	-0.0137313				45.8381	-0.00919389				45.9093	-0.00466138				45.9455	-0.000145679				45.9466	0.00434139				45.9131	0.00878812				45.8451	0.0131829
				20	0.05	71.8	20	45.5061	-0.0229622	45.5799	-0.0182577				45.7244	-0.0137298				45.8307	-0.00919494				45.9019	-0.00466496				45.938	-0.000151772				45.9393	0.0043328				45.9058	0.00877707				45.8379	0.0131695
				20	0.05	71.85	20	45.4987	-0.0229555	45.5725	-0.0182537				45.7169	-0.0137283				45.8232	-0.00919598				45.8944	-0.00466853				45.9306	-0.000157861				45.9319	0.00432423				45.8984	0.00876603				45.8306	0.013156
				20	0.05	71.9	20	45.4913	-0.0229489	45.5651	-0.0182496				45.7094	-0.0137268				45.8157	-0.00919703				45.887	-0.0046721				45.9232	-0.000163944				45.9245	0.00431565				45.8911	0.00875501				45.8234	0.0131426
				20	0.05	71.95	20	45.4839	-0.0229422	45.5577	-0.0182456				45.702	-0.0137253				45.8083	-0.00919807				45.8795	-0.00467567				45.9157	-0.000170022				45.9171	0.00430709				45.8838	0.00874399				45.8162	0.0131291
				20	0.05	72	20	45.4765	-0.0229355	45.5502	-0.0182416				45.6945	-0.0137238				45.8008	-0.0091991				45.8721	-0.00467923				45.9083	-0.000176096				45.9097	0.00429853				45.8765	0.00873297				45.809	0.0131157
				20	0.05	72.05	20	45.4691	-0.0229289	45.5428	-0.0182375				45.6871	-0.0137224				45.7934	-0.00920014				45.8646	-0.0046828				45.9009	-0.000182164				45.9024	0.00428998				45.8692	0.00872197				45.8017	0.0131023
				20	0.05	72.1	20	45.4617	-0.0229222	45.5354	-0.0182335				45.6797	-0.0137209				45.7859	-0.00920118				45.8572	-0.00468635				45.8935	-0.000188226				45.895	0.00428143				45.8619	0.00871098				45.7945	0.0130889
				20	0.05	72.15	20	45.4544	-0.0229156	45.528	-0.0182295				45.6722	-0.0137194				45.7785	-0.00920221				45.8497	-0.00468991				45.8861	-0.000194284				45.8876	0.0042729				45.8546	0.00869999				45.7873	0.0130755
				20	0.05	72.2	20	45.447	-0.0229089	45.5206	-0.0182255				45.6648	-0.0137179				45.771	-0.00920324				45.8423	-0.00469346				45.8787	-0.000200337				45.8803	0.00426436				45.8473	0.00868901				45.7801	0.0130621
				20	0.05	72.25	20	45.4396	-0.0229023	45.5132	-0.0182215				45.6574	-0.0137164				45.7636	-0.00920427				45.8349	-0.004697				45.8713	-0.000206385				45.8729	0.00425584				45.84	0.00867804				45.7729	0.0130487
				20	0.05	72.3	20	45.4322	-0.0228956	45.5058	-0.0182174				45.65	-0.0137149				45.7562	-0.0092053				45.8275	-0.00470055				45.8639	-0.000212427				45.8656	0.00424732				45.8327	0.00866708				45.7657	0.0130354
				20	0.05	72.35	20	45.4249	-0.022889	45.4985	-0.0182134				45.6425	-0.0137134				45.7487	-0.00920633				45.82	-0.00470409				45.8565	-0.000218465				45.8582	0.00423881				45.8255	0.00865612				45.7585	0.013022
				20	0.05	72.4	20	45.4175	-0.0228824	45.4911	-0.0182094				45.6351	-0.0137119				45.7413	-0.00920735				45.8126	-0.00470762				45.8491	-0.000224497				45.8509	0.00423031				45.8182	0.00864518				45.7513	0.0130087
				20	0.05	72.45	20	45.4101	-0.0228758	45.4837	-0.0182054				45.6277	-0.0137104				45.7339	-0.00920838				45.8052	-0.00471116				45.8417	-0.000230525				45.8435	0.00422181				45.8109	0.00863424				45.7441	0.0129953
				20	0.05	72.5	20	45.4028	-0.0228691	45.4763	-0.0182014				45.6203	-0.0137089				45.7265	-0.0092094				45.7978	-0.00471469				45.8343	-0.000236548				45.8362	0.00421332				45.8036	0.00862331				45.737	0.012982
				20	0.05	72.55	20	45.3954	-0.0228625	45.469	-0.0181974				45.6129	-0.0137074				45.7191	-0.00921042				45.7904	-0.00471821				45.827	-0.000242565				45.8289	0.00420483				45.7964	0.00861239				45.7298	0.0129687
				20	0.05	72.6	20	45.3881	-0.0228559	45.4616	-0.0181934				45.6055	-0.0137059				45.7117	-0.00921144				45.783	-0.00472174				45.8196	-0.000248578				45.8216	0.00419635				45.7891	0.00860147				45.7226	0.0129554
				20	0.05	72.65	20	45.3807	-0.0228493	45.4542	-0.0181894				45.5981	-0.0137044				45.7042	-0.00921245				45.7756	-0.00472526				45.8122	-0.000254585				45.8142	0.00418788				45.7819	0.00859057				45.7154	0.0129421
				20	0.05	72.7	20	45.3734	-0.0228427	45.4469	-0.0181854				45.5907	-0.0137029				45.6968	-0.00921347				45.7682	-0.00472877				45.8049	-0.000260588				45.8069	0.00417942				45.7746	0.00857967				45.7083	0.0129288
				20	0.05	72.75	20	45.3661	-0.0228361	45.4395	-0.0181814				45.5834	-0.0137014				45.6895	-0.00921448				45.7608	-0.00473229				45.7975	-0.000266586				45.7996	0.00417096				45.7674	0.00856878				45.7011	0.0129155
				20	0.05	72.8	20	45.3587	-0.0228295	45.4322	-0.0181774				45.576	-0.0136999				45.6821	-0.0092155				45.7534	-0.0047358				45.7901	-0.000272578				45.7923	0.0041625				45.7601	0.0085579				45.6939	0.0129022
				20	0.05	72.85	20	45.3514	-0.0228229	45.4248	-0.0181734				45.5686	-0.0136984				45.6747	-0.00921651				45.7461	-0.0047393				45.7828	-0.000278566				45.785	0.00415406				45.7529	0.00854703				45.6868	0.0128889
				20	0.05	72.9	20	45.3441	-0.0228163	45.4175	-0.0181694				45.5612	-0.013697				45.6673	-0.00921752				45.7387	-0.00474281				45.7754	-0.000284549				45.7777	0.00414562				45.7456	0.00853616				45.6796	0.0128757
				20	0.05	72.95	20	45.3368	-0.0228097	45.4102	-0.0181654				45.5539	-0.0136955				45.6599	-0.00921852				45.7313	-0.00474631				45.7681	-0.000290527				45.7704	0.00413719				45.7384	0.00852531				45.6725	0.0128624
				20	0.05	73	20	45.3295	-0.0228031	45.4028	-0.0181614				45.5465	-0.013694				45.6525	-0.00921953				45.7239	-0.00474981				45.7608	-0.0002965				45.7631	0.00412876				45.7312	0.00851446				45.6653	0.0128492
				20	0.05	73.05	20	45.3221	-0.0227965	45.3955	-0.0181574				45.5391	-0.0136925				45.6452	-0.00922053				45.7166	-0.0047533				45.7534	-0.000302469				45.7558	0.00412034				45.724	0.00850362				45.6582	0.012836
				20	0.05	73.1	20	45.3148	-0.0227899	45.3882	-0.0181534				45.5318	-0.013691				45.6378	-0.00922154				45.7092	-0.00475679				45.7461	-0.000308432				45.7485	0.00411193				45.7167	0.00849278				45.6511	0.0128228
				20	0.05	73.15	20	45.3075	-0.0227833	45.3809	-0.0181494				45.5244	-0.0136895				45.6304	-0.00922254				45.7019	-0.00476028				45.7388	-0.000314391				45.7412	0.00410352				45.7095	0.00848196				45.6439	0.0128096
				20	0.05	73.2	20	45.3002	-0.0227768	45.3736	-0.0181455				45.5171	-0.013688				45.6231	-0.00922354				45.6945	-0.00476376				45.7314	-0.000320345				45.734	0.00409512				45.7023	0.00847114				45.6368	0.0127964
				20	0.05	73.25	20	45.2929	-0.0227702	45.3662	-0.0181415				45.5098	-0.0136865				45.6157	-0.00922454				45.6872	-0.00476724				45.7241	-0.000326294				45.7267	0.00408673				45.6951	0.00846033				45.6297	0.0127832
				20	0.05	73.3	20	45.2856	-0.0227636	45.3589	-0.0181375				45.5024	-0.013685				45.6084	-0.00922553				45.6798	-0.00477072				45.7168	-0.000332238				45.7194	0.00407834				45.6879	0.00844953				45.6226	0.01277
				20	0.05	73.35	20	45.2784	-0.0227571	45.3516	-0.0181335				45.4951	-0.0136835				45.601	-0.00922653				45.6725	-0.0047742				45.7095	-0.000338177				45.7122	0.00406996				45.6807	0.00843874				45.6154	0.0127568
				20	0.05	73.4	20	45.2711	-0.0227505	45.3443	-0.0181295				45.4878	-0.013682				45.5937	-0.00922752				45.6652	-0.00477767				45.7022	-0.000344112				45.7049	0.00406158				45.6735	0.00842795				45.6083	0.0127437
				20	0.05	73.45	20	45.2638	-0.022744	45.337	-0.0181256				45.4804	-0.0136805				45.5864	-0.00922851				45.6578	-0.00478114				45.6949	-0.000350041				45.6976	0.00405321				45.6663	0.00841717				45.6012	0.0127305
				20	0.05	73.5	20	45.2565	-0.0227374	45.3297	-0.0181216				45.4731	-0.0136791				45.579	-0.0092295				45.6505	-0.0047846				45.6876	-0.000355966				45.6904	0.00404485				45.6591	0.0084064				45.5941	0.0127174
				20	0.05	73.55	20	45.2493	-0.0227309	45.3225	-0.0181176				45.4658	-0.0136776				45.5717	-0.00923049				45.6432	-0.00478806				45.6803	-0.000361887				45.6831	0.00403649				45.6519	0.00839564				45.587	0.0127043
				20	0.05	73.6	20	45.242	-0.0227243	45.3152	-0.0181137				45.4585	-0.0136761				45.5644	-0.00923148				45.6359	-0.00479152				45.673	-0.000367802				45.6759	0.00402814				45.6448	0.00838489				45.5799	0.0126911
				20	0.05	73.65	20	45.2347	-0.0227178	45.3079	-0.0181097				45.4512	-0.0136746				45.557	-0.00923247				45.6286	-0.00479498				45.6657	-0.000373713				45.6687	0.0040198				45.6376	0.00837414				45.5728	0.012678
				20	0.05	73.7	20	45.2275	-0.0227113	45.3006	-0.0181057				45.4439	-0.0136731				45.5497	-0.00923345				45.6212	-0.00479843				45.6584	-0.000379619				45.6614	0.00401146				45.6304	0.0083634				45.5657	0.0126649
				20	0.05	73.75	20	45.2202	-0.0227047	45.2934	-0.0181018				45.4366	-0.0136716				45.5424	-0.00923444				45.6139	-0.00480188				45.6512	-0.00038552				45.6542	0.00400313				45.6232	0.00835267				45.5586	0.0126518
				20	0.05	73.8	20	45.213	-0.0226982	45.2861	-0.0180978				45.4293	-0.0136701				45.5351	-0.00923542				45.6066	-0.00480533				45.6439	-0.000391417				45.647	0.00399481				45.6161	0.00834195				45.5516	0.0126387
				20	0.05	73.85	20	45.2057	-0.0226917	45.2788	-0.0180939				45.422	-0.0136686				45.5278	-0.0092364				45.5993	-0.00480877				45.6366	-0.000397309				45.6397	0.00398649				45.6089	0.00833123				45.5445	0.0126257
				20	0.05	73.9	20	45.1985	-0.0226851	45.2716	-0.0180899				45.4147	-0.0136671				45.5205	-0.00923738				45.592	-0.00481221				45.6293	-0.000403196				45.6325	0.00397818				45.6018	0.00832052				45.5374	0.0126126
				20	0.05	73.95	20	45.1912	-0.0226786	45.2643	-0.0180859				45.4074	-0.0136656				45.5132	-0.00923836				45.5848	-0.00481565				45.6221	-0.000409079				45.6253	0.00396987				45.5946	0.00830982				45.5303	0.0125995
				20	0.05	74	20	45.184	-0.0226721	45.2571	-0.018082				45.4001	-0.0136642				45.5059	-0.00923933				45.5775	-0.00481908				45.6148	-0.000414957				45.6181	0.00396157				45.5875	0.00829913				45.5233	0.0125865
				20	0.05	74.05	20	45.1768	-0.0226656	45.2498	-0.018078				45.3928	-0.0136627				45.4986	-0.00924031				45.5702	-0.00482251				45.6076	-0.00042083				45.6109	0.00395328				45.5803	0.00828844				45.5162	0.0125734
				20	0.05	74.1	20	45.1696	-0.0226591	45.2426	-0.0180741				45.3856	-0.0136612				45.4913	-0.00924128				45.5629	-0.00482594				45.6003	-0.000426699				45.6037	0.00394499				45.5732	0.00827777				45.5092	0.0125604
				20	0.05	74.15	20	45.1623	-0.0226526	45.2353	-0.0180701				45.3783	-0.0136597				45.4841	-0.00924225				45.5556	-0.00482937				45.5931	-0.000432563				45.5965	0.00393671				45.566	0.0082671				45.5021	0.0125474
				20	0.05	74.2	20	45.1551	-0.0226461	45.2281	-0.0180662				45.371	-0.0136582				45.4768	-0.00924322				45.5484	-0.00483279				45.5858	-0.000438422				45.5893	0.00392843				45.5589	0.00825643				45.4951	0.0125344
				20	0.05	74.25	20	45.1479	-0.0226396	45.2209	-0.0180623				45.3638	-0.0136567				45.4695	-0.00924419				45.5411	-0.00483621				45.5786	-0.000444277				45.5821	0.00392016				45.5518	0.00824578				45.488	0.0125214
				20	0.05	74.3	20	45.1407	-0.0226331	45.2137	-0.0180583				45.3565	-0.0136552				45.4622	-0.00924516				45.5339	-0.00483962				45.5714	-0.000450127				45.5749	0.0039119				45.5447	0.00823513				45.481	0.0125084
				20	0.05	74.35	20	45.1335	-0.0226266	45.2064	-0.0180544				45.3493	-0.0136537				45.455	-0.00924612				45.5266	-0.00484304				45.5641	-0.000455973				45.5677	0.00390365				45.5375	0.00822449				45.4739	0.0124954
				20	0.05	74.4	20	45.1263	-0.0226201	45.1992	-0.0180504				45.342	-0.0136523				45.4477	-0.00924709				45.5193	-0.00484645				45.5569	-0.000461814				45.5605	0.00389539				45.5304	0.00821386				45.4669	0.0124824
				20	0.05	74.45	20	45.1191	-0.0226137	45.192	-0.0180465				45.3348	-0.0136508				45.4405	-0.00924805				45.5121	-0.00484985				45.5497	-0.00046765				45.5533	0.00388715				45.5233	0.00820324				45.4599	0.0124694
				20	0.05	74.5	20	45.1119	-0.0226072	45.1848	-0.0180426				45.3275	-0.0136493				45.4332	-0.00924901				45.5048	-0.00485326				45.5425	-0.000473482				45.5462	0.00387891				45.5162	0.00819262				45.4528	0.0124565
				20	0.05	74.55	20	45.1047	-0.0226007	45.1776	-0.0180386				45.3203	-0.0136478				45.426	-0.00924998				45.4976	-0.00485666				45.5352	-0.00047931				45.539	0.00387068				45.5091	0.00818201				45.4458	0.0124435
				20	0.05	74.6	20	45.0975	-0.0225942	45.1704	-0.0180347				45.3131	-0.0136463				45.4187	-0.00925093				45.4904	-0.00486006				45.528	-0.000485132				45.5318	0.00386245				45.502	0.00817141				45.4388	0.0124306
				20	0.05	74.65	20	45.0903	-0.0225878	45.1632	-0.0180308				45.3058	-0.0136448				45.4115	-0.00925189				45.4831	-0.00486345				45.5208	-0.000490951				45.5247	0.00385423				45.4949	0.00816082				45.4318	0.0124177
				20	0.05	74.7	20	45.0832	-0.0225813	45.156	-0.0180269				45.2986	-0.0136433				45.4042	-0.00925285				45.4759	-0.00486684				45.5136	-0.000496765				45.5175	0.00384602				45.4878	0.00815023				45.4248	0.0124047
				20	0.05	74.75	20	45.076	-0.0225748	45.1488	-0.0180229				45.2914	-0.0136419				45.397	-0.0092538				45.4687	-0.00487023				45.5064	-0.000502574				45.5104	0.00383781				45.4807	0.00813965				45.4178	0.0123918
				20	0.05	74.8	20	45.0688	-0.0225684	45.1416	-0.018019				45.2842	-0.0136404				45.3898	-0.00925476				45.4615	-0.00487362				45.4992	-0.000508379				45.5032	0.00382961				45.4736	0.00812908				45.4108	0.0123789
				20	0.05	74.85	20	45.0616	-0.0225619	45.1344	-0.0180151				45.277	-0.0136389				45.3826	-0.00925571				45.4542	-0.004877				45.492	-0.000514179				45.4961	0.00382141				45.4665	0.00811851				45.4038	0.012366
				20	0.05	74.9	20	45.0545	-0.0225555	45.1273	-0.0180112				45.2697	-0.0136374				45.3753	-0.00925666				45.447	-0.00488038				45.4849	-0.000519975				45.4889	0.00381322				45.4595	0.00810796				45.3968	0.0123531
				20	0.05	74.95	20	45.0473	-0.022549	45.1201	-0.0180073				45.2625	-0.0136359				45.3681	-0.00925761				45.4398	-0.00488376				45.4777	-0.000525766				45.4818	0.00380504				45.4524	0.00809741				45.3898	0.0123402
				20	0.05	75	20	45.0402	-0.0225426	45.1129	-0.0180033				45.2553	-0.0136344				45.3609	-0.00925856				45.4326	-0.00488714				45.4705	-0.000531553				45.4747	0.00379686				45.4453	0.00808687				45.3828	0.0123274
				20	0.05	75.05	20	45.033	-0.0225362	45.1058	-0.0179994				45.2481	-0.013633				45.3537	-0.00925951				45.4254	-0.00489051				45.4633	-0.000537336				45.4675	0.00378868				45.4383	0.00807633				45.3758	0.0123145
				20	0.05	75.1	20	45.0259	-0.0225297	45.0986	-0.0179955				45.241	-0.0136315				45.3465	-0.00926045				45.4182	-0.00489388				45.4562	-0.000543114				45.4604	0.00378052				45.4312	0.0080658				45.3688	0.0123017
				20	0.05	75.15	20	45.0187	-0.0225233	45.0914	-0.0179916				45.2338	-0.01363				45.3393	-0.0092614				45.411	-0.00489724				45.449	-0.000548888				45.4533	0.00377236				45.4241	0.00805528				45.3618	0.0122888
				20	0.05	75.2	20	45.0116	-0.0225169	45.0843	-0.0179877				45.2266	-0.0136285				45.3321	-0.00926234				45.4038	-0.0049006				45.4418	-0.000554657				45.4462	0.0037642				45.4171	0.00804477				45.3549	0.012276
				20	0.05	75.25	20	45.0045	-0.0225104	45.0771	-0.0179838				45.2194	-0.013627				45.3249	-0.00926328				45.3967	-0.00490396				45.4347	-0.000560422				45.439	0.00375605				45.41	0.00803427				45.3479	0.0122632
				20	0.05	75.3	20	44.9973	-0.022504	45.07	-0.0179799				45.2122	-0.0136255				45.3177	-0.00926422				45.3895	-0.00490732				45.4275	-0.000566182				45.4319	0.00374791				45.403	0.00802377				45.3409	0.0122503
				20	0.05	75.35	20	44.9902	-0.0224976	45.0628	-0.017976				45.2051	-0.0136241				45.3105	-0.00926516				45.3823	-0.00491068				45.4204	-0.000571938				45.4248	0.00373977				45.3959	0.00801328				45.334	0.0122375
				20	0.05	75.4	20	44.9831	-0.0224912	45.0557	-0.0179721				45.1979	-0.0136226				45.3034	-0.0092661				45.3751	-0.00491403				45.4132	-0.00057769				45.4177	0.00373164				45.3889	0.00800279				45.327	0.0122247
				20	0.05	75.45	20	44.976	-0.0224848	45.0486	-0.0179682				45.1907	-0.0136211				45.2962	-0.00926704				45.368	-0.00491738				45.4061	-0.000583437				45.4106	0.00372352				45.3819	0.00799232				45.32	0.0122119
				20	0.05	75.5	20	44.9689	-0.0224784	45.0414	-0.0179643				45.1836	-0.0136196				45.289	-0.00926797				45.3608	-0.00492072				45.3989	-0.00058918				45.4035	0.0037154				45.3748	0.00798185				45.3131	0.0121991
				20	0.05	75.55	20	44.9617	-0.022472	45.0343	-0.0179604				45.1764	-0.0136181				45.2819	-0.00926891				45.3536	-0.00492407				45.3918	-0.000594919				45.3964	0.00370728				45.3678	0.00797139				45.3062	0.0121864
				20	0.05	75.6	20	44.9546	-0.0224656	45.0272	-0.0179565				45.1693	-0.0136167				45.2747	-0.00926984				45.3465	-0.00492741				45.3847	-0.000600653				45.3894	0.00369918				45.3608	0.00796093				45.2992	0.0121736
				20	0.05	75.65	20	44.9475	-0.0224592	45.0201	-0.0179526				45.1621	-0.0136152				45.2675	-0.00927077				45.3393	-0.00493074				45.3775	-0.000606383				45.3823	0.00369107				45.3538	0.00795049				45.2923	0.0121608
				20	0.05	75.7	20	44.9404	-0.0224528	45.013	-0.0179487				45.155	-0.0136137				45.2604	-0.0092717				45.3322	-0.00493408				45.3704	-0.000612108				45.3752	0.00368298				45.3467	0.00794005				45.2853	0.0121481
				20	0.05	75.75	20	44.9333	-0.0224464	45.0059	-0.0179448				45.1478	-0.0136122				45.2532	-0.00927263				45.325	-0.00493741				45.3633	-0.00061783				45.3681	0.00367489				45.3397	0.00792961				45.2784	0.0121354
				20	0.05	75.8	20	44.9263	-0.02244	44.9988	-0.017941				45.1407	-0.0136107				45.2461	-0.00927356				45.3179	-0.00494074				45.3562	-0.000623547				45.3611	0.0036668				45.3327	0.00791919				45.2715	0.0121226
				20	0.05	75.85	20	44.9192	-0.0224336	44.9917	-0.0179371				45.1335	-0.0136093				45.2389	-0.00927449				45.3108	-0.00494406				45.3491	-0.000629259				45.354	0.00365872				45.3257	0.00790877				45.2646	0.0121099
				20	0.05	75.9	20	44.9121	-0.0224273	44.9846	-0.0179332				45.1264	-0.0136078				45.2318	-0.00927541				45.3036	-0.00494739				45.342	-0.000634968				45.3469	0.00365065				45.3187	0.00789836				45.2576	0.0120972
				20	0.05	75.95	20	44.905	-0.0224209	44.9775	-0.0179293				45.1193	-0.0136063				45.2247	-0.00927634				45.2965	-0.00495071				45.3349	-0.000640672				45.3399	0.00364258				45.3117	0.00788796				45.2507	0.0120845
				20	0.05	76	20	44.8979	-0.0224145	44.9704	-0.0179254				45.1122	-0.0136048				45.2175	-0.00927726				45.2894	-0.00495403				45.3278	-0.000646372				45.3328	0.00363452				45.3047	0.00787756				45.2438	0.0120718
				20	0.05	76.05	20	44.8909	-0.0224081	44.9633	-0.0179216				45.1051	-0.0136033				45.2104	-0.00927818				45.2822	-0.00495734				45.3207	-0.000652067				45.3258	0.00362646				45.2977	0.00786717				45.2369	0.0120591
				20	0.05	76.1	20	44.8838	-0.0224018	44.9562	-0.0179177				45.0979	-0.0136019				45.2033	-0.0092791				45.2751	-0.00496065				45.3136	-0.000657759				45.3187	0.00361841				45.2908	0.00785679				45.23	0.0120464
				20	0.05	76.15	20	44.8767	-0.0223954	44.9491	-0.0179138				45.0908	-0.0136004				45.1961	-0.00928002				45.268	-0.00496396				45.3065	-0.000663446				45.3117	0.00361037				45.2838	0.00784641				45.2231	0.0120337
				20	0.05	76.2	20	44.8697	-0.0223891	44.942	-0.01791				45.0837	-0.0135989				45.189	-0.00928094				45.2609	-0.00496727				45.2994	-0.000669128				45.3046	0.00360233				45.2768	0.00783604				45.2162	0.0120211
				20	0.05	76.25	20	44.8626	-0.0223827	44.935	-0.0179061				45.0766	-0.0135974				45.1819	-0.00928186				45.2538	-0.00497058				45.2923	-0.000674807				45.2976	0.0035943				45.2698	0.00782568				45.2093	0.0120084
				20	0.05	76.3	20	44.8556	-0.0223764	44.9279	-0.0179022				45.0695	-0.013596				45.1748	-0.00928277				45.2467	-0.00497388				45.2852	-0.000680481				45.2906	0.00358627				45.2629	0.00781533				45.2024	0.0119958
				20	0.05	76.35	20	44.8485	-0.02237	44.9208	-0.0178984				45.0624	-0.0135945				45.1677	-0.00928369				45.2396	-0.00497718				45.2782	-0.000686152				45.2835	0.00357825				45.2559	0.00780498				45.1955	0.0119831
				20	0.05	76.4	20	44.8415	-0.0223637	44.9138	-0.0178945				45.0554	-0.013593				45.1606	-0.0092846				45.2325	-0.00498047				45.2711	-0.000691818				45.2765	0.00357023				45.2489	0.00779464				45.1886	0.0119705
				20	0.05	76.45	20	44.8344	-0.0223573	44.9067	-0.0178906				45.0483	-0.0135915				45.1535	-0.00928551				45.2254	-0.00498376				45.264	-0.00069748				45.2695	0.00356222				45.242	0.00778431				45.1818	0.0119579
				20	0.05	76.5	20	44.8274	-0.022351	44.8997	-0.0178868				45.0412	-0.0135901				45.1464	-0.00928642				45.2183	-0.00498706				45.257	-0.000703137				45.2625	0.00355422				45.235	0.00777398				45.1749	0.0119453
				20	0.05	76.55	20	44.8204	-0.0223447	44.8926	-0.0178829				45.0341	-0.0135886				45.1393	-0.00928733				45.2113	-0.00499034				45.2499	-0.000708791				45.2555	0.00354622				45.2281	0.00776366				45.168	0.0119327
				20	0.05	76.6	20	44.8134	-0.0223383	44.8856	-0.0178791				45.027	-0.0135871				45.1322	-0.00928824				45.2042	-0.00499363				45.2429	-0.00071444				45.2485	0.00353822				45.2211	0.00775335				45.1611	0.0119201
				20	0.05	76.65	20	44.8063	-0.022332	44.8786	-0.0178752				45.02	-0.0135856				45.1252	-0.00928915				45.1971	-0.00499691				45.2358	-0.000720085				45.2414	0.00353023				45.2142	0.00774305				45.1543	0.0119075
				20	0.05	76.7	20	44.7993	-0.0223257	44.8715	-0.0178714				45.0129	-0.0135842				45.1181	-0.00929006				45.19	-0.00500019				45.2288	-0.000725726				45.2344	0.00352225				45.2072	0.00773275				45.1474	0.0118949
				20	0.05	76.75	20	44.7923	-0.0223194	44.8645	-0.0178675				45.0058	-0.0135827				45.111	-0.00929096				45.183	-0.00500347				45.2217	-0.000731363				45.2274	0.00351428				45.2003	0.00772246				45.1406	0.0118823
				20	0.05	76.8	20	44.7853	-0.0223131	44.8575	-0.0178637				44.9988	-0.0135812				45.1039	-0.00929187				45.1759	-0.00500674				45.2147	-0.000736996				45.2205	0.0035063				45.1934	0.00771217				45.1337	0.0118698
				20	0.05	76.85	20	44.7783	-0.0223068	44.8504	-0.0178598				44.9917	-0.0135798				45.0969	-0.00929277				45.1688	-0.00501002				45.2077	-0.000742624				45.2135	0.00349834				45.1864	0.0077019				45.1269	0.0118572
				20	0.05	76.9	20	44.7713	-0.0223004	44.8434	-0.017856				44.9847	-0.0135783				45.0898	-0.00929367				45.1618	-0.00501328				45.2006	-0.000748249				45.2065	0.00349038				45.1795	0.00769163				45.12	0.0118446
				20	0.05	76.95	20	44.7643	-0.0222941	44.8364	-0.0178522				44.9776	-0.0135768				45.0828	-0.00929457				45.1547	-0.00501655				45.1936	-0.000753869				45.1995	0.00348242				45.1726	0.00768136				45.1132	0.0118321
				20	0.05	77	20	44.7573	-0.0222878	44.8294	-0.0178483				44.9706	-0.0135753				45.0757	-0.00929547				45.1477	-0.00501982				45.1866	-0.000759485				45.1925	0.00347447				45.1657	0.00767111				45.1063	0.0118196
				20	0.05	77.05	20	44.7503	-0.0222815	44.8224	-0.0178445				44.9635	-0.0135739				45.0687	-0.00929637				45.1407	-0.00502308				45.1796	-0.000765097				45.1855	0.00346653				45.1588	0.00766086				45.0995	0.0118071
				20	0.05	77.1	20	44.7433	-0.0222753	44.8154	-0.0178406				44.9565	-0.0135724				45.0616	-0.00929727				45.1336	-0.00502634				45.1726	-0.000770706				45.1786	0.00345859				45.1519	0.00765061				45.0927	0.0117945
				20	0.05	77.15	20	44.7363	-0.022269	44.8084	-0.0178368				44.9495	-0.0135709				45.0546	-0.00929816				45.1266	-0.00502959				45.1656	-0.00077631				45.1716	0.00345066				45.1449	0.00764038				45.0859	0.011782
				20	0.05	77.2	20	44.7293	-0.0222627	44.8014	-0.017833				44.9425	-0.0135695				45.0475	-0.00929906				45.1195	-0.00503285				45.1585	-0.000781909				45.1646	0.00344273				45.138	0.00763015				45.079	0.0117695
				20	0.05	77.25	20	44.7223	-0.0222564	44.7944	-0.0178291				44.9354	-0.013568				45.0405	-0.00929995				45.1125	-0.0050361				45.1515	-0.000787505				45.1577	0.00343481				45.1311	0.00761993				45.0722	0.011757
				20	0.05	77.3	20	44.7154	-0.0222501	44.7874	-0.0178253				44.9284	-0.0135665				45.0335	-0.00930084				45.1055	-0.00503934				45.1445	-0.000793097				45.1507	0.00342689				45.1243	0.00760971				45.0654	0.0117446
				20	0.05	77.35	20	44.7084	-0.0222438	44.7804	-0.0178215				44.9214	-0.0135651				45.0264	-0.00930173				45.0985	-0.00504259				45.1376	-0.000798685				45.1438	0.00341898				45.1174	0.0075995				45.0586	0.0117321
				20	0.05	77.4	20	44.7014	-0.0222376	44.7734	-0.0178177				44.9144	-0.0135636				45.0194	-0.00930262				45.0915	-0.00504583				45.1306	-0.000804269				45.1368	0.00341108				45.1105	0.0075893				45.0518	0.0117196
				20	0.05	77.45	20	44.6945	-0.0222313	44.7665	-0.0178139				44.9074	-0.0135621				45.0124	-0.00930351				45.0845	-0.00504907				45.1236	-0.000809848				45.1299	0.00340318				45.1036	0.00757911				45.045	0.0117072
				20	0.05	77.5	20	44.6875	-0.022225	44.7595	-0.01781				44.9004	-0.0135607				45.0054	-0.0093044				45.0774	-0.00505231				45.1166	-0.000815424				45.123	0.00339528				45.0967	0.00756892				45.0382	0.0116947
				20	0.05	77.55	20	44.6806	-0.0222188	44.7525	-0.0178062				44.8934	-0.0135592				44.9984	-0.00930529				45.0704	-0.00505555				45.1096	-0.000820996				45.116	0.00338739				45.0898	0.00755874				45.0314	0.0116823
				20	0.05	77.6	20	44.6736	-0.0222125	44.7456	-0.0178024				44.8864	-0.0135577				44.9914	-0.00930618				45.0634	-0.00505878				45.1026	-0.000826563				45.1091	0.00337951				45.083	0.00754856				45.0246	0.0116698
				20	0.05	77.65	20	44.6667	-0.0222063	44.7386	-0.0177986				44.8794	-0.0135563				44.9844	-0.00930706				45.0564	-0.00506201				45.0957	-0.000832127				45.1022	0.00337163				45.0761	0.0075384				45.0178	0.0116574
				20	0.05	77.7	20	44.6597	-0.0222	44.7316	-0.0177948				44.8724	-0.0135548				44.9774	-0.00930794				45.0495	-0.00506524				45.0887	-0.000837687				45.0952	0.00336376				45.0692	0.00752824				45.011	0.011645
				20	0.05	77.75	20	44.6528	-0.0221938	44.7247	-0.017791				44.8654	-0.0135533				44.9704	-0.00930883				45.0425	-0.00506846				45.0817	-0.000843243				45.0883	0.00335589				45.0624	0.00751808				45.0042	0.0116326
				20	0.05	77.8	20	44.6459	-0.0221875	44.7177	-0.0177872				44.8584	-0.0135519				44.9634	-0.00930971				45.0355	-0.00507169				45.0748	-0.000848794				45.0814	0.00334803				45.0555	0.00750794				44.9975	0.0116202
				20	0.05	77.85	20	44.6389	-0.0221813	44.7108	-0.0177833				44.8515	-0.0135504				44.9564	-0.00931059				45.0285	-0.00507491				45.0678	-0.000854342				45.0745	0.00334017				45.0487	0.00749779				44.9907	0.0116078
				20	0.05	77.9	20	44.632	-0.022175	44.7038	-0.0177795				44.8445	-0.0135489				44.9494	-0.00931147				45.0215	-0.00507812				45.0609	-0.000859886				45.0676	0.00333232				45.0418	0.00748766				44.9839	0.0115954
				20	0.05	77.95	20	44.6251	-0.0221688	44.6969	-0.0177757				44.8375	-0.0135475				44.9424	-0.00931235				45.0145	-0.00508134				45.0539	-0.000865426				45.0607	0.00332448				45.035	0.00747753				44.9772	0.011583
				20	0.05	78	20	44.6182	-0.0221626	44.69	-0.0177719				44.8306	-0.013546				44.9354	-0.00931323				45.0076	-0.00508455				45.047	-0.000870962				45.0538	0.00331663				45.0281	0.00746741				44.9704	0.0115707
				20	0.05	78.05	20	44.6112	-0.0221563	44.683	-0.0177681				44.8236	-0.0135446				44.9285	-0.0093141				45.0006	-0.00508776				45.04	-0.000876494				45.0469	0.0033088				45.0213	0.0074573				44.9636	0.0115583
				20	0.05	78.1	20	44.6043	-0.0221501	44.6761	-0.0177643				44.8166	-0.0135431				44.9215	-0.00931498				44.9937	-0.00509097				45.0331	-0.000882022				45.04	0.00330097				45.0145	0.00744719				44.9569	0.011546
				20	0.05	78.15	20	44.5974	-0.0221439	44.6692	-0.0177606				44.8097	-0.0135416				44.9145	-0.00931585				44.9867	-0.00509417				45.0262	-0.000887546				45.0331	0.00329314				45.0076	0.00743709				44.9501	0.0115336
				20	0.05	78.2	20	44.5905	-0.0221377	44.6623	-0.0177568				44.8027	-0.0135402				44.9076	-0.00931673				44.9797	-0.00509738				45.0192	-0.000893066				45.0262	0.00328533				45.0008	0.007427				44.9434	0.0115213
				20	0.05	78.25	20	44.5836	-0.0221315	44.6554	-0.017753				44.7958	-0.0135387				44.9006	-0.0093176				44.9728	-0.00510058				45.0123	-0.000898582				45.0193	0.00327751				44.994	0.00741691				44.9366	0.0115089
				20	0.05	78.3	20	44.5767	-0.0221253	44.6484	-0.0177492				44.7889	-0.0135373				44.8937	-0.00931847				44.9658	-0.00510378				45.0054	-0.000904094				45.0124	0.0032697				44.9872	0.00740683				44.9299	0.0114966
				20	0.05	78.35	20	44.5698	-0.0221191	44.6415	-0.0177454				44.7819	-0.0135358				44.8867	-0.00931934				44.9589	-0.00510697				44.9985	-0.000909603				45.0056	0.0032619				44.9804	0.00739676				44.9232	0.0114843
				20	0.05	78.4	20	44.5629	-0.0221128	44.6346	-0.0177416				44.775	-0.0135343				44.8798	-0.00932021				44.952	-0.00511016				44.9916	-0.000915108				44.9987	0.0032541				44.9736	0.00738669				44.9164	0.011472
				20	0.05	78.45	20	44.5561	-0.0221066	44.6277	-0.0177378				44.768	-0.0135329				44.8728	-0.00932108				44.945	-0.00511335				44.9847	-0.000920608				44.9918	0.00324631				44.9667	0.00737663				44.9097	0.0114597
				20	0.05	78.5	20	44.5492	-0.0221005	44.6208	-0.017734				44.7611	-0.0135314				44.8659	-0.00932194				44.9381	-0.00511654				44.9777	-0.000926105				44.985	0.00323852				44.9599	0.00736658				44.903	0.0114474
				20	0.05	78.55	20	44.5423	-0.0220943	44.6139	-0.0177303				44.7542	-0.01353				44.859	-0.00932281				44.9312	-0.00511973				44.9708	-0.000931598				44.9781	0.00323074				44.9531	0.00735653				44.8962	0.0114351
				20	0.05	78.6	20	44.5354	-0.0220881	44.6071	-0.0177265				44.7473	-0.0135285				44.852	-0.00932368				44.9242	-0.00512291				44.9639	-0.000937087				44.9712	0.00322296				44.9463	0.00734649				44.8895	0.0114229
				20	0.05	78.65	20	44.5286	-0.0220819	44.6002	-0.0177227				44.7404	-0.013527				44.8451	-0.00932454				44.9173	-0.00512609				44.957	-0.000942572				44.9644	0.00321519				44.9396	0.00733645				44.8828	0.0114106
				20	0.05	78.7	20	44.5217	-0.0220757	44.5933	-0.0177189				44.7335	-0.0135256				44.8382	-0.0093254				44.9104	-0.00512927				44.9502	-0.000948054				44.9575	0.00320742				44.9328	0.00732643				44.8761	0.0113983
				20	0.05	78.75	20	44.5148	-0.0220695	44.5864	-0.0177152				44.7265	-0.0135241				44.8313	-0.00932626				44.9035	-0.00513244				44.9433	-0.000953531				44.9507	0.00319966				44.926	0.0073164				44.8694	0.0113861
				20	0.05	78.8	20	44.508	-0.0220633	44.5795	-0.0177114				44.7196	-0.0135227				44.8244	-0.00932713				44.8966	-0.00513562				44.9364	-0.000959005				44.9439	0.0031919				44.9192	0.00730639				44.8627	0.0113739
				20	0.05	78.85	20	44.5011	-0.0220572	44.5727	-0.0177076				44.7127	-0.0135212				44.8174	-0.00932799				44.8897	-0.00513879				44.9295	-0.000964475				44.937	0.00318415				44.9124	0.00729638				44.856	0.0113616
				20	0.05	78.9	20	44.4943	-0.022051	44.5658	-0.0177039				44.7059	-0.0135198				44.8105	-0.00932885				44.8828	-0.00514196				44.9226	-0.000969941				44.9302	0.00317641				44.9056	0.00728638				44.8493	0.0113494
				20	0.05	78.95	20	44.4874	-0.0220448	44.5589	-0.0177001				44.699	-0.0135183				44.8036	-0.0093297				44.8759	-0.00514512				44.9158	-0.000975403				44.9234	0.00316867				44.8989	0.00727639				44.8426	0.0113372
				20	0.05	79	20	44.4806	-0.0220387	44.5521	-0.0176963				44.6921	-0.0135169				44.7967	-0.00933056				44.869	-0.00514828				44.9089	-0.000980862				44.9165	0.00316093				44.8921	0.0072664				44.8359	0.011325
				20	0.05	79.05	20	44.4737	-0.0220325	44.5452	-0.0176926				44.6852	-0.0135154				44.7898	-0.00933142				44.8621	-0.00515145				44.902	-0.000986317				44.9097	0.0031532				44.8853	0.00725641				44.8292	0.0113128
				20	0.05	79.1	20	44.4669	-0.0220264	44.5384	-0.0176888				44.6783	-0.013514				44.7829	-0.00933227				44.8552	-0.0051546				44.8952	-0.000991767				44.9029	0.00314547				44.8786	0.00724644				44.8226	0.0113006
				20	0.05	79.15	20	44.4601	-0.0220202	44.5315	-0.0176851				44.6714	-0.0135125				44.7761	-0.00933313				44.8483	-0.00515776				44.8883	-0.000997215				44.8961	0.00313775				44.8718	0.00723647				44.8159	0.0112884
				20	0.05	79.2	20	44.4532	-0.0220141	44.5247	-0.0176813				44.6646	-0.013511				44.7692	-0.00933398				44.8415	-0.00516091				44.8815	-0.00100266				44.8893	0.00313004				44.8651	0.00722651				44.8092	0.0112762
				20	0.05	79.25	20	44.4464	-0.0220079	44.5178	-0.0176775				44.6577	-0.0135096				44.7623	-0.00933483				44.8346	-0.00516407				44.8746	-0.0010081				44.8825	0.00312233				44.8583	0.00721655				44.8025	0.011264
				20	0.05	79.3	20	44.4396	-0.0220018	44.511	-0.0176738				44.6508	-0.0135081				44.7554	-0.00933568				44.8277	-0.00516721				44.8678	-0.00101353				44.8757	0.00311462				44.8516	0.0072066				44.7959	0.0112519
				20	0.05	79.35	20	44.4328	-0.0219956	44.5042	-0.01767				44.644	-0.0135067				44.7485	-0.00933653				44.8209	-0.00517036				44.8609	-0.00101897				44.8689	0.00310692				44.8449	0.00719666				44.7892	0.0112397
				20	0.05	79.4	20	44.426	-0.0219895	44.4973	-0.0176663				44.6371	-0.0135052				44.7417	-0.00933738				44.814	-0.00517351				44.8541	-0.00102439				44.8621	0.00309923				44.8381	0.00718672				44.7825	0.0112276
				20	0.05	79.45	20	44.4192	-0.0219834	44.4905	-0.0176626				44.6302	-0.0135038				44.7348	-0.00933823				44.8071	-0.00517665				44.8472	-0.00102982				44.8553	0.00309154				44.8314	0.00717679				44.7759	0.0112154
				20	0.05	79.5	20	44.4124	-0.0219772	44.4837	-0.0176588				44.6234	-0.0135023				44.728	-0.00933908				44.8003	-0.00517979				44.8404	-0.00103524				44.8485	0.00308386				44.8247	0.00716687				44.7692	0.0112033
				20	0.05	79.55	20	44.4055	-0.0219711	44.4769	-0.0176551				44.6166	-0.0135009				44.7211	-0.00933992				44.7934	-0.00518292				44.8336	-0.00104066				44.8417	0.00307618				44.8179	0.00715695				44.7626	0.0111912
				20	0.05	79.6	20	44.3988	-0.021965	44.4701	-0.0176513				44.6097	-0.0134994				44.7142	-0.00934077				44.7866	-0.00518606				44.8268	-0.00104607				44.8349	0.0030685				44.8112	0.00714704				44.7559	0.011179
				20	0.05	79.65	20	44.392	-0.0219589	44.4633	-0.0176476				44.6029	-0.013498				44.7074	-0.00934162				44.7797	-0.00518919				44.8199	-0.00105148				44.8281	0.00306083				44.8045	0.00713713				44.7493	0.0111669
				20	0.05	79.7	20	44.3852	-0.0219528	44.4565	-0.0176439				44.596	-0.0134966				44.7005	-0.00934246				44.7729	-0.00519232				44.8131	-0.00105688				44.8214	0.00305317				44.7978	0.00712723				44.7427	0.0111548
				20	0.05	79.75	20	44.3784	-0.0219466	44.4497	-0.0176401				44.5892	-0.0134951				44.6937	-0.0093433				44.7661	-0.00519545				44.8063	-0.00106229				44.8146	0.00304551				44.7911	0.00711734				44.736	0.0111427
				20	0.05	79.8	20	44.3716	-0.0219405	44.4429	-0.0176364				44.5824	-0.0134937				44.6869	-0.00934414				44.7592	-0.00519858				44.7995	-0.00106769				44.8078	0.00303786				44.7844	0.00710746				44.7294	0.0111306
				20	0.05	79.85	20	44.3648	-0.0219344	44.4361	-0.0176327				44.5756	-0.0134922				44.68	-0.00934498				44.7524	-0.0052017				44.7927	-0.00107308				44.8011	0.00303021				44.7777	0.00709758				44.7228	0.0111186
				20	0.05	79.9	20	44.358	-0.0219283	44.4293	-0.0176289				44.5687	-0.0134908				44.6732	-0.00934582				44.7456	-0.00520482				44.7859	-0.00107847				44.7943	0.00302256				44.771	0.0070877				44.7161	0.0111065
				20	0.05	79.95	20	44.3513	-0.0219222	44.4225	-0.0176252				44.5619	-0.0134893				44.6664	-0.00934666				44.7388	-0.00520794				44.7791	-0.00108386				44.7875	0.00301492				44.7643	0.00707784				44.7095	0.0110944
				20	0.05	80	20	44.3445	-0.0219161	44.4157	-0.0176215				44.5551	-0.0134879				44.6595	-0.0093475				44.7319	-0.00521106				44.7723	-0.00108924				44.7808	0.00300729				44.7576	0.00706798				44.7029	0.0110824
				20	0.05	80.05	20	44.3377	-0.0219101	44.4089	-0.0176178				44.5483	-0.0134864				44.6527	-0.00934834				44.7251	-0.00521417				44.7655	-0.00109462				44.774	0.00299966				44.7509	0.00705812				44.6963	0.0110703
				20	0.05	80.1	20	44.331	-0.021904	44.4022	-0.017614				44.5415	-0.013485				44.6459	-0.00934918				44.7183	-0.00521728				44.7587	-0.0011				44.7673	0.00299204				44.7442	0.00704827				44.6897	0.0110583
				20	0.05	80.15	20	44.3242	-0.0218979	44.3954	-0.0176103				44.5347	-0.0134836				44.6391	-0.00935001				44.7115	-0.00522039				44.752	-0.00110537				44.7606	0.00298442				44.7375	0.00703843				44.6831	0.0110462
				20	0.05	80.2	20	44.3175	-0.0218918	44.3886	-0.0176066				44.5279	-0.0134821				44.6323	-0.00935084				44.7047	-0.0052235				44.7452	-0.00111074				44.7538	0.00297681				44.7308	0.0070286				44.6765	0.0110342
				20	0.05	80.25	20	44.3107	-0.0218857	44.3818	-0.0176029				44.5211	-0.0134807				44.6255	-0.00935168				44.6979	-0.0052266				44.7384	-0.00111611				44.7471	0.0029692				44.7242	0.00701877				44.6699	0.0110222
				20	0.05	80.3	20	44.304	-0.0218796	44.3751	-0.0175992				44.5143	-0.0134792				44.6187	-0.00935251				44.6911	-0.00522971				44.7316	-0.00112147				44.7404	0.00296159				44.7175	0.00700895				44.6633	0.0110102
				20	0.05	80.35	20	44.2972	-0.0218736	44.3683	-0.0175955				44.5075	-0.0134778				44.6119	-0.00935334				44.6843	-0.00523281				44.7249	-0.00112683				44.7336	0.00295399				44.7108	0.00699913				44.6567	0.0109982
				20	0.05	80.4	20	44.2905	-0.0218675	44.3616	-0.0175917				44.5007	-0.0134763				44.6051	-0.00935417				44.6775	-0.0052359				44.7181	-0.00113218				44.7269	0.0029464				44.7042	0.00698932				44.6501	0.0109862
				20	0.05	80.45	20	44.2838	-0.0218614	44.3548	-0.017588				44.494	-0.0134749				44.5983	-0.009355				44.6708	-0.005239				44.7113	-0.00113753				44.7202	0.00293881				44.6975	0.00697952				44.6435	0.0109742
				20	0.05	80.5	20	44.277	-0.0218554	44.3481	-0.0175843				44.4872	-0.0134735				44.5915	-0.00935583				44.664	-0.00524209				44.7046	-0.00114288				44.7135	0.00293123				44.6908	0.00696972				44.6369	0.0109622
				20	0.05	80.55	20	44.2703	-0.0218493	44.3413	-0.0175806				44.4804	-0.013472				44.5847	-0.00935666				44.6572	-0.00524518				44.6978	-0.00114822				44.7068	0.00292365				44.6842	0.00695993				44.6304	0.0109502
				20	0.05	80.6	20	44.2636	-0.0218433	44.3346	-0.0175769				44.4736	-0.0134706				44.578	-0.00935749				44.6504	-0.00524827				44.6911	-0.00115356				44.7001	0.00291607				44.6775	0.00695014				44.6238	0.0109383
				20	0.05	80.65	20	44.2569	-0.0218372	44.3279	-0.0175732				44.4669	-0.0134691				44.5712	-0.00935831				44.6437	-0.00525136				44.6843	-0.0011589				44.6934	0.0029085				44.6709	0.00694036				44.6172	0.0109263
				20	0.05	80.7	20	44.2501	-0.0218312	44.3211	-0.0175695				44.4601	-0.0134677				44.5644	-0.00935914				44.6369	-0.00525444				44.6776	-0.00116423				44.6867	0.00290094				44.6643	0.00693059				44.6107	0.0109143
				20	0.05	80.75	20	44.2434	-0.0218251	44.3144	-0.0175658				44.4534	-0.0134663				44.5576	-0.00935997				44.6301	-0.00525753				44.6709	-0.00116956				44.68	0.00289338				44.6576	0.00692082				44.6041	0.0109024
				20	0.05	80.8	20	44.2367	-0.0218191	44.3077	-0.0175621				44.4466	-0.0134648				44.5509	-0.00936079				44.6234	-0.00526061				44.6641	-0.00117489				44.6733	0.00288583				44.651	0.00691106				44.5975	0.0108905
				20	0.05	80.85	20	44.23	-0.021813	44.301	-0.0175584				44.4399	-0.0134634				44.5441	-0.00936161				44.6166	-0.00526368				44.6574	-0.00118021				44.6666	0.00287828				44.6444	0.00690131				44.591	0.0108785
				20	0.05	80.9	20	44.2233	-0.021807	44.2942	-0.0175548				44.4331	-0.013462				44.5374	-0.00936243				44.6099	-0.00526676				44.6507	-0.00118553				44.6599	0.00287073				44.6377	0.00689156				44.5844	0.0108666
				20	0.05	80.95	20	44.2166	-0.021801	44.2875	-0.0175511				44.4264	-0.0134605				44.5306	-0.00936326				44.6031	-0.00526983				44.644	-0.00119084				44.6532	0.00286319				44.6311	0.00688182				44.5779	0.0108547
				20	0.05	81	20	44.2099	-0.021795	44.2808	-0.0175474				44.4196	-0.0134591				44.5239	-0.00936408				44.5964	-0.0052729				44.6372	-0.00119615				44.6465	0.00285566				44.6245	0.00687208				44.5713	0.0108428
				20	0.05	81.05	20	44.2032	-0.0217889	44.2741	-0.0175437				44.4129	-0.0134577				44.5171	-0.0093649				44.5896	-0.00527597				44.6305	-0.00120146				44.6399	0.00284813				44.6179	0.00686235				44.5648	0.0108309
				20	0.05	81.1	20	44.1965	-0.0217829	44.2674	-0.01754				44.4062	-0.0134562				44.5104	-0.00936571				44.5829	-0.00527904				44.6238	-0.00120677				44.6332	0.0028406				44.6113	0.00685263				44.5583	0.010819
				20	0.05	81.15	20	44.1899	-0.0217769	44.2607	-0.0175363				44.3995	-0.0134548				44.5036	-0.00936653				44.5762	-0.0052821				44.6171	-0.00121207				44.6265	0.00283308				44.6047	0.00684291				44.5517	0.0108071
				20	0.05	81.2	20	44.1832	-0.0217709	44.254	-0.0175327				44.3927	-0.0134534				44.4969	-0.00936735				44.5694	-0.00528517				44.6104	-0.00121736				44.6199	0.00282556				44.598	0.0068332				44.5452	0.0107952
				20	0.05	81.25	20	44.1765	-0.0217649	44.2473	-0.017529				44.386	-0.0134519				44.4902	-0.00936816				44.5627	-0.00528823				44.6037	-0.00122266				44.6132	0.00281805				44.5914	0.00682349				44.5387	0.0107834
				20	0.05	81.3	20	44.1698	-0.0217589	44.2407	-0.0175253				44.3793	-0.0134505				44.4834	-0.00936898				44.556	-0.00529128				44.597	-0.00122795				44.6066	0.00281055				44.5848	0.00681379				44.5322	0.0107715
				20	0.05	81.35	20	44.1632	-0.0217529	44.234	-0.0175216				44.3726	-0.0134491				44.4767	-0.00936979				44.5493	-0.00529434				44.5903	-0.00123323				44.5999	0.00280305				44.5783	0.0068041				44.5256	0.0107596
				20	0.05	81.4	20	44.1565	-0.0217469	44.2273	-0.017518				44.3659	-0.0134476				44.47	-0.00937061				44.5426	-0.00529739				44.5836	-0.00123852				44.5933	0.00279555				44.5717	0.00679441				44.5191	0.0107478
				20	0.05	81.45	20	44.1498	-0.0217409	44.2206	-0.0175143				44.3592	-0.0134462				44.4633	-0.00937142				44.5359	-0.00530045				44.5769	-0.0012438				44.5866	0.00278806				44.5651	0.00678473				44.5126	0.0107359
				20	0.05	81.5	20	44.1432	-0.0217349	44.2139	-0.0175106				44.3525	-0.0134448				44.4566	-0.00937223				44.5292	-0.00530349				44.5703	-0.00124907				44.58	0.00278057				44.5585	0.00677506				44.5061	0.0107241
				20	0.05	81.55	20	44.1365	-0.0217289	44.2073	-0.017507				44.3458	-0.0134434				44.4499	-0.00937304				44.5225	-0.00530654				44.5636	-0.00125435				44.5733	0.00277309				44.5519	0.00676539				44.4996	0.0107123
				20	0.05	81.6	20	44.1299	-0.0217229	44.2006	-0.0175033				44.3391	-0.0134419				44.4432	-0.00937385				44.5158	-0.00530959				44.5569	-0.00125962				44.5667	0.00276561				44.5453	0.00675573				44.4931	0.0107005
				20	0.05	81.65	20	44.1232	-0.0217169	44.194	-0.0174996				44.3324	-0.0134405				44.4365	-0.00937466				44.5091	-0.00531263				44.5502	-0.00126488				44.5601	0.00275814				44.5388	0.00674607				44.4866	0.0106887
				20	0.05	81.7	20	44.1166	-0.0217109	44.1873	-0.017496				44.3257	-0.0134391				44.4298	-0.00937547				44.5024	-0.00531567				44.5436	-0.00127014				44.5534	0.00275067				44.5322	0.00673642				44.4801	0.0106768
				20	0.05	81.75	20	44.11	-0.0217049	44.1806	-0.0174923				44.319	-0.0134376				44.4231	-0.00937628				44.4957	-0.00531871				44.5369	-0.0012754				44.5468	0.00274321				44.5256	0.00672678				44.4736	0.0106651
				20	0.05	81.8	20	44.1033	-0.021699	44.174	-0.0174886				44.3123	-0.0134362				44.4164	-0.00937709				44.489	-0.00532174				44.5302	-0.00128066				44.5402	0.00273575				44.5191	0.00671714				44.4671	0.0106533
				20	0.05	81.85	20	44.0967	-0.021693	44.1673	-0.017485				44.3057	-0.0134348				44.4097	-0.00937789				44.4823	-0.00532478				44.5236	-0.00128591				44.5336	0.0027283				44.5125	0.0067075				44.4606	0.0106415
				20	0.05	81.9	20	44.0901	-0.021687	44.1607	-0.0174813				44.299	-0.0134334				44.403	-0.0093787				44.4756	-0.00532781				44.5169	-0.00129116				44.527	0.00272085				44.506	0.00669788				44.4542	0.0106297
				20	0.05	81.95	20	44.0834	-0.0216811	44.1541	-0.0174777				44.2923	-0.0134319				44.3963	-0.0093795				44.469	-0.00533084				44.5103	-0.0012964				44.5204	0.00271341				44.4994	0.00668826				44.4477	0.0106179
				20	0.05	82	20	44.0768	-0.0216751	44.1474	-0.017474				44.2857	-0.0134305				44.3897	-0.00938031				44.4623	-0.00533387				44.5036	-0.00130164				44.5138	0.00270597				44.4929	0.00667864				44.4412	0.0106062
				20	0.05	82.05	20	44.0702	-0.0216691	44.1408	-0.0174704				44.279	-0.0134291				44.383	-0.00938111				44.4556	-0.00533689				44.497	-0.00130688				44.5072	0.00269853				44.4863	0.00666903				44.4347	0.0105944
				20	0.05	82.1	20	44.0636	-0.0216632	44.1342	-0.0174667				44.2723	-0.0134277				44.3763	-0.00938191				44.449	-0.00533992				44.4904	-0.00131212				44.5006	0.0026911				44.4798	0.00665943				44.4283	0.0105827
				20	0.05	82.15	20	44.057	-0.0216572	44.1275	-0.0174631				44.2657	-0.0134262				44.3697	-0.00938271				44.4423	-0.00534294				44.4837	-0.00131735				44.494	0.00268368				44.4732	0.00664984				44.4218	0.0105709
				20	0.05	82.2	20	44.0504	-0.0216513	44.1209	-0.0174595				44.259	-0.0134248				44.363	-0.00938351				44.4357	-0.00534596				44.4771	-0.00132258				44.4874	0.00267626				44.4667	0.00664024				44.4154	0.0105592
				20	0.05	82.25	20	44.0438	-0.0216453	44.1143	-0.0174558				44.2524	-0.0134234				44.3563	-0.00938431				44.429	-0.00534897				44.4705	-0.0013278				44.4808	0.00266884				44.4602	0.00663066				44.4089	0.0105475
				20	0.05	82.3	20	44.0372	-0.0216394	44.1077	-0.0174522				44.2458	-0.013422				44.3497	-0.00938511				44.4224	-0.00535199				44.4638	-0.00133302				44.4742	0.00266143				44.4537	0.00662108				44.4024	0.0105358
				20	0.05	82.35	20	44.0306	-0.0216335	44.1011	-0.0174485				44.2391	-0.0134206				44.343	-0.00938591				44.4157	-0.005355				44.4572	-0.00133824				44.4676	0.00265402				44.4471	0.00661151				44.396	0.010524
				20	0.05	82.4	20	44.024	-0.0216275	44.0945	-0.0174449				44.2325	-0.0134191				44.3364	-0.00938671				44.4091	-0.00535801				44.4506	-0.00134345				44.461	0.00264662				44.4406	0.00660194				44.3896	0.0105123
				20	0.05	82.45	20	44.0174	-0.0216216	44.0879	-0.0174413				44.2258	-0.0134177				44.3297	-0.0093875				44.4025	-0.00536102				44.444	-0.00134866				44.4545	0.00263923				44.4341	0.00659238				44.3831	0.0105006
				20	0.05	82.5	20	44.0108	-0.0216157	44.0813	-0.0174377				44.2192	-0.0134163				44.3231	-0.0093883				44.3958	-0.00536403				44.4374	-0.00135387				44.4479	0.00263183				44.4276	0.00658283				44.3767	0.0104889
				20	0.05	82.55	20	44.0042	-0.0216097	44.0747	-0.017434				44.2126	-0.0134149				44.3165	-0.00938909				44.3892	-0.00536703				44.4308	-0.00135907				44.4413	0.00262445				44.4211	0.00657328				44.3702	0.0104773
				20	0.05	82.6	20	43.9977	-0.0216038	44.0681	-0.0174304				44.206	-0.0134135				44.3098	-0.00938989				44.3826	-0.00537003				44.4242	-0.00136427				44.4348	0.00261706				44.4146	0.00656373				44.3638	0.0104656
				20	0.05	82.65	20	43.9911	-0.0215979	44.0615	-0.0174268				44.1994	-0.0134121				44.3032	-0.00939068				44.3759	-0.00537303				44.4176	-0.00136947				44.4282	0.00260969				44.4081	0.0065542				44.3574	0.0104539
				20	0.05	82.7	20	43.9845	-0.021592	44.0549	-0.0174231				44.1927	-0.0134106				44.2966	-0.00939147				44.3693	-0.00537603				44.411	-0.00137466				44.4217	0.00260231				44.4016	0.00654466				44.351	0.0104423
				20	0.05	82.75	20	43.978	-0.0215861	44.0483	-0.0174195				44.1861	-0.0134092				44.29	-0.00939227				44.3627	-0.00537903				44.4044	-0.00137986				44.4151	0.00259494				44.3951	0.00653514				44.3445	0.0104306
				20	0.05	82.8	20	43.9714	-0.0215802	44.0418	-0.0174159				44.1795	-0.0134078				44.2834	-0.00939306				44.3561	-0.00538202				44.3978	-0.00138504				44.4086	0.00258758				44.3886	0.00652562				44.3381	0.010419
				20	0.05	82.85	20	43.9648	-0.0215742	44.0352	-0.0174123				44.1729	-0.0134064				44.2767	-0.00939385				44.3495	-0.00538501				44.3912	-0.00139023				44.402	0.00258022				44.3821	0.00651611				44.3317	0.0104073
				20	0.05	82.9	20	43.9583	-0.0215683	44.0286	-0.0174087				44.1663	-0.013405				44.2701	-0.00939464				44.3429	-0.005388				44.3846	-0.00139541				44.3955	0.00257286				44.3756	0.0065066				44.3253	0.0103957
				20	0.05	82.95	20	43.9517	-0.0215624	44.0221	-0.0174051				44.1597	-0.0134036				44.2635	-0.00939543				44.3363	-0.00539099				44.3781	-0.00140058				44.3889	0.00256551				44.3691	0.0064971				44.3189	0.0103841
				20	0.05	83	20	43.9452	-0.0215565	44.0155	-0.0174015				44.1531	-0.0134022				44.2569	-0.00939621				44.3297	-0.00539398				44.3715	-0.00140576				44.3824	0.00255817				44.3627	0.0064876				44.3125	0.0103724
				20	0.05	83.05	20	43.9386	-0.0215507	44.0089	-0.0173978				44.1466	-0.0134007				44.2503	-0.009397				44.3231	-0.00539696				44.3649	-0.00141093				44.3759	0.00255083				44.3562	0.00647811				44.3061	0.0103608
				20	0.05	83.1	20	43.9321	-0.0215448	44.0024	-0.0173942				44.14	-0.0133993				44.2437	-0.00939779				44.3165	-0.00539994				44.3584	-0.00141609				44.3694	0.00254349				44.3497	0.00646862				44.2997	0.0103492
				20	0.05	83.15	20	43.9256	-0.0215389	43.9958	-0.0173906				44.1334	-0.0133979				44.2371	-0.00939857				44.3099	-0.00540292				44.3518	-0.00142126				44.3628	0.00253616				44.3433	0.00645915				44.2933	0.0103376
				20	0.05	83.2	20	43.919	-0.021533	43.9893	-0.017387				44.1268	-0.0133965				44.2306	-0.00939936				44.3033	-0.0054059				44.3452	-0.00142642				44.3563	0.00252883				44.3368	0.00644967				44.2869	0.010326
				20	0.05	83.25	20	43.9125	-0.0215271	43.9827	-0.0173834				44.1202	-0.0133951				44.224	-0.00940014				44.2968	-0.00540887				44.3387	-0.00143157				44.3498	0.00252151				44.3303	0.00644021				44.2805	0.0103144
				20	0.05	83.3	20	43.906	-0.0215212	43.9762	-0.0173798				44.1137	-0.0133937				44.2174	-0.00940093				44.2902	-0.00541185				44.3321	-0.00143673				44.3433	0.00251419				44.3239	0.00643074				44.2742	0.0103029
				20	0.05	83.35	20	43.8994	-0.0215154	43.9697	-0.0173762				44.1071	-0.0133923				44.2108	-0.00940171				44.2836	-0.00541482				44.3256	-0.00144188				44.3368	0.00250688				44.3174	0.00642129				44.2678	0.0102913
				20	0.05	83.4	20	43.8929	-0.0215095	43.9631	-0.0173726				44.1005	-0.0133909				44.2042	-0.00940249				44.2771	-0.00541779				44.319	-0.00144702				44.3303	0.00249957				44.311	0.00641184				44.2614	0.0102797
				20	0.05	83.45	20	43.8864	-0.0215036	43.9566	-0.017369				44.094	-0.0133895				44.1977	-0.00940327				44.2705	-0.00542075				44.3125	-0.00145217				44.3238	0.00249226				44.3045	0.0064024				44.255	0.0102682
				20	0.05	83.5	20	43.8799	-0.0214978	43.9501	-0.0173654				44.0874	-0.0133881				44.1911	-0.00940405				44.2639	-0.00542372				44.306	-0.00145731				44.3173	0.00248496				44.2981	0.00639296				44.2487	0.0102566
				20	0.05	83.55	20	43.8734	-0.0214919	43.9435	-0.0173618				44.0809	-0.0133866				44.1845	-0.00940483				44.2574	-0.00542668				44.2994	-0.00146244				44.3108	0.00247767				44.2917	0.00638353				44.2423	0.0102451
				20	0.05	83.6	20	43.8669	-0.021486	43.937	-0.0173583				44.0743	-0.0133852				44.178	-0.00940561				44.2508	-0.00542964				44.2929	-0.00146758				44.3043	0.00247038				44.2852	0.0063741				44.2359	0.0102336
				20	0.05	83.65	20	43.8604	-0.0214802	43.9305	-0.0173547				44.0678	-0.0133838				44.1714	-0.00940639				44.2443	-0.0054326				44.2864	-0.00147271				44.2978	0.00246309				44.2788	0.00636468				44.2296	0.010222
				20	0.05	83.7	20	43.8539	-0.0214743	43.924	-0.0173511				44.0613	-0.0133824				44.1649	-0.00940717				44.2377	-0.00543556				44.2798	-0.00147784				44.2913	0.00245581				44.2724	0.00635526				44.2232	0.0102105
				20	0.05	83.75	20	43.8474	-0.0214685	43.9175	-0.0173475				44.0547	-0.013381				44.1583	-0.00940794				44.2312	-0.00543851				44.2733	-0.00148296				44.2849	0.00244853				44.2659	0.00634585				44.2169	0.010199
				20	0.05	83.8	20	43.8409	-0.0214626	43.911	-0.0173439				44.0482	-0.0133796				44.1518	-0.00940872				44.2247	-0.00544147				44.2668	-0.00148808				44.2784	0.00244126				44.2595	0.00633645				44.2105	0.0101875
				20	0.05	83.85	20	43.8344	-0.0214568	43.9045	-0.0173403				44.0417	-0.0133782				44.1452	-0.0094095				44.2181	-0.00544442				44.2603	-0.0014932				44.2719	0.00243399				44.2531	0.00632705				44.2042	0.010176
				20	0.05	83.9	20	43.8279	-0.021451	43.898	-0.0173368				44.0351	-0.0133768				44.1387	-0.00941027				44.2116	-0.00544737				44.2538	-0.00149831				44.2654	0.00242673				44.2467	0.00631766				44.1978	0.0101645
				20	0.05	83.95	20	43.8214	-0.0214451	43.8915	-0.0173332				44.0286	-0.0133754				44.1322	-0.00941104				44.2051	-0.00545031				44.2473	-0.00150342				44.259	0.00241947				44.2403	0.00630827				44.1915	0.010153
				20	0.05	84	20	43.815	-0.0214393	43.885	-0.0173296				44.0221	-0.013374				44.1256	-0.00941182				44.1985	-0.00545326				44.2408	-0.00150853				44.2525	0.00241222				44.2339	0.00629889				44.1852	0.0101415
				20	0.05	84.05	20	43.8085	-0.0214335	43.8785	-0.017326				44.0156	-0.0133726				44.1191	-0.00941259				44.192	-0.0054562				44.2343	-0.00151363				44.2461	0.00240497				44.2275	0.00628952				44.1788	0.01013
				20	0.05	84.1	20	43.802	-0.0214276	43.872	-0.0173225				44.0091	-0.0133712				44.1126	-0.00941336				44.1855	-0.00545914				44.2278	-0.00151874				44.2396	0.00239772				44.2211	0.00628015				44.1725	0.0101186
				20	0.05	84.15	20	43.7956	-0.0214218	43.8655	-0.0173189				44.0025	-0.0133698				44.1061	-0.00941413				44.179	-0.00546208				44.2213	-0.00152383				44.2331	0.00239048				44.2147	0.00627079				44.1662	0.0101071
				20	0.05	84.2	20	43.7891	-0.021416	43.8591	-0.0173153				43.996	-0.0133684				44.0996	-0.0094149				44.1725	-0.00546502				44.2148	-0.00152893				44.2267	0.00238324				44.2083	0.00626143				44.1599	0.0100957
				20	0.05	84.25	20	43.7826	-0.0214102	43.8526	-0.0173118				43.9895	-0.013367				44.093	-0.00941567				44.166	-0.00546795				44.2083	-0.00153402				44.2203	0.00237601				44.2019	0.00625208				44.1536	0.0100842
				20	0.05	84.3	20	43.7762	-0.0214044	43.8461	-0.0173082				43.983	-0.0133656				44.0865	-0.00941644				44.1595	-0.00547089				44.2019	-0.00153911				44.2138	0.00236878				44.1955	0.00624273				44.1473	0.0100728
				20	0.05	84.35	20	43.7697	-0.0213986	43.8397	-0.0173046				43.9765	-0.0133642				44.08	-0.00941721				44.153	-0.00547382				44.1954	-0.00154419				44.2074	0.00236156				44.1891	0.00623339				44.1409	0.0100614
				20	0.05	84.4	20	43.7633	-0.0213928	43.8332	-0.0173011				43.9701	-0.0133628				44.0735	-0.00941798				44.1465	-0.00547675				44.1889	-0.00154927				44.2009	0.00235434				44.1828	0.00622405				44.1346	0.0100499
				20	0.05	84.45	20	43.7568	-0.021387	43.8267	-0.0172975				43.9636	-0.0133614				44.067	-0.00941875				44.14	-0.00547968				44.1824	-0.00155435				44.1945	0.00234713				44.1764	0.00621472				44.1283	0.0100385
				20	0.05	84.5	20	43.7504	-0.0213812	43.8203	-0.017294				43.9571	-0.01336				44.0605	-0.00941951				44.1335	-0.0054826				44.176	-0.00155943				44.1881	0.00233992				44.17	0.0062054				44.122	0.0100271
				20	0.05	84.55	20	43.744	-0.0213754	43.8138	-0.0172904				43.9506	-0.0133586				44.054	-0.00942028				44.127	-0.00548552				44.1695	-0.0015645				44.1817	0.00233271				44.1637	0.00619608				44.1157	0.0100157
				20	0.05	84.6	20	43.7375	-0.0213696	43.8074	-0.0172869				43.9441	-0.0133572				44.0476	-0.00942104				44.1205	-0.00548845				44.163	-0.00156957				44.1752	0.00232551				44.1573	0.00618677				44.1095	0.0100043
				20	0.05	84.65	20	43.7311	-0.0213638	43.8009	-0.0172833				43.9377	-0.0133558				44.0411	-0.00942181				44.114	-0.00549136				44.1566	-0.00157463				44.1688	0.00231831				44.1509	0.00617746				44.1032	0.00999291
				20	0.05	84.7	20	43.7247	-0.021358	43.7945	-0.0172798				43.9312	-0.0133544				44.0346	-0.00942257				44.1076	-0.00549428				44.1501	-0.00157969				44.1624	0.00231112				44.1446	0.00616816				44.0969	0.00998152
				20	0.05	84.75	20	43.7182	-0.0213522	43.7881	-0.0172762				43.9247	-0.013353				44.0281	-0.00942333				44.1011	-0.0054972				44.1437	-0.00158475				44.156	0.00230393				44.1382	0.00615886				44.0906	0.00997014
				20	0.05	84.8	20	43.7118	-0.0213464	43.7816	-0.0172727				43.9183	-0.0133517				44.0216	-0.00942409				44.0946	-0.00550011				44.1373	-0.00158981				44.1496	0.00229675				44.1319	0.00614957				44.0843	0.00995877
				20	0.05	84.85	20	43.7054	-0.0213406	43.7752	-0.0172691				43.9118	-0.0133503				44.0152	-0.00942486				44.0882	-0.00550302				44.1308	-0.00159486				44.1432	0.00228957				44.1255	0.00614029				44.078	0.00994741
				20	0.05	84.9	20	43.699	-0.0213349	43.7688	-0.0172656				43.9053	-0.0133489				44.0087	-0.00942562				44.0817	-0.00550593				44.1244	-0.00159991				44.1368	0.0022824				44.1192	0.00613101				44.0718	0.00993605
				20	0.05	84.95	20	43.6926	-0.0213291	43.7623	-0.017262				43.8989	-0.0133475				44.0022	-0.00942638				44.0753	-0.00550884				44.1179	-0.00160496				44.1304	0.00227523				44.1128	0.00612174				44.0655	0.0099247
				20	0.05	85	20	43.6862	-0.0213233	43.7559	-0.0172585				43.8924	-0.0133461				43.9958	-0.00942714				44.0688	-0.00551175				44.1115	-0.00161				44.124	0.00226806				44.1065	0.00611247				44.0592	0.00991336
				20	0.05	85.05	20	43.6798	-0.0213176	43.7495	-0.017255				43.886	-0.0133447				43.9893	-0.00942789				44.0624	-0.00551465				44.1051	-0.00161504				44.1176	0.0022609				44.1002	0.00610321				44.053	0.00990202
				20	0.05	85.1	20	43.6734	-0.0213118	43.7431	-0.0172514				43.8796	-0.0133433				43.9829	-0.00942865				44.0559	-0.00551755				44.0987	-0.00162008				44.1112	0.00225374				44.0938	0.00609395				44.0467	0.00989069
				20	0.05	85.15	20	43.667	-0.021306	43.7367	-0.0172479				43.8731	-0.0133419				43.9764	-0.00942941				44.0495	-0.00552045				44.0922	-0.00162511				44.1049	0.00224659				44.0875	0.0060847				44.0405	0.00987937
				20	0.05	85.2	20	43.6606	-0.0213003	43.7303	-0.0172444				43.8667	-0.0133405				43.97	-0.00943017				44.043	-0.00552335				44.0858	-0.00163014				44.0985	0.00223944				44.0812	0.00607546				44.0342	0.00986805
				20	0.05	85.25	20	43.6542	-0.0212945	43.7239	-0.0172409				43.8603	-0.0133391				43.9636	-0.00943092				44.0366	-0.00552625				44.0794	-0.00163517				44.0921	0.0022323				44.0749	0.00606622				44.028	0.00985674
				20	0.05	85.3	20	43.6478	-0.0212888	43.7175	-0.0172373				43.8538	-0.0133378				43.9571	-0.00943168				44.0302	-0.00552914				44.073	-0.0016402				44.0857	0.00222516				44.0686	0.00605698				44.0217	0.00984544
				20	0.05	85.35	20	43.6414	-0.021283	43.7111	-0.0172338				43.8474	-0.0133364				43.9507	-0.00943243				44.0237	-0.00553203				44.0666	-0.00164522				44.0794	0.00221802				44.0623	0.00604775				44.0155	0.00983414
				20	0.05	85.4	20	43.6351	-0.0212773	43.7047	-0.0172303				43.841	-0.013335				43.9442	-0.00943319				44.0173	-0.00553492				44.0602	-0.00165023				44.073	0.00221089				44.0559	0.00603853				44.0093	0.00982285
				20	0.05	85.45	20	43.6287	-0.0212716	43.6983	-0.0172268				43.8346	-0.0133336				43.9378	-0.00943394				44.0109	-0.00553781				44.0538	-0.00165525				44.0666	0.00220376				44.0496	0.00602931				44.003	0.00981157
				20	0.05	85.5	20	43.6223	-0.0212658	43.6919	-0.0172232				43.8282	-0.0133322				43.9314	-0.00943469				44.0045	-0.0055407				44.0474	-0.00166026				44.0603	0.00219664				44.0433	0.0060201				43.9968	0.0098003
				20	0.05	85.55	20	43.616	-0.0212601	43.6855	-0.0172197				43.8218	-0.0133308				43.925	-0.00943544				43.9981	-0.00554358				44.041	-0.00166527				44.0539	0.00218952				44.037	0.00601089				43.9906	0.00978903
				20	0.05	85.6	20	43.6096	-0.0212544	43.6792	-0.0172162				43.8153	-0.0133295				43.9186	-0.00943619				43.9916	-0.00554647				44.0346	-0.00167027				44.0476	0.00218241				44.0307	0.00600169				43.9843	0.00977776
				20	0.05	85.65	20	43.6032	-0.0212486	43.6728	-0.0172127				43.8089	-0.0133281				43.9121	-0.00943695				43.9852	-0.00554935				44.0282	-0.00167528				44.0412	0.0021753				44.0245	0.0059925				43.9781	0.00976651
				20	0.05	85.7	20	43.5969	-0.0212429	43.6664	-0.0172092				43.8025	-0.0133267				43.9057	-0.0094377				43.9788	-0.00555223				44.0219	-0.00168028				44.0349	0.0021682				44.0182	0.00598331				43.9719	0.00975526
				20	0.05	85.75	20	43.5905	-0.0212372	43.66	-0.0172057				43.7962	-0.0133253				43.8993	-0.00943844				43.9724	-0.0055551				44.0155	-0.00168527				44.0286	0.0021611				44.0119	0.00597412				43.9657	0.00974401
				20	0.05	85.8	20	43.5842	-0.0212315	43.6537	-0.0172022				43.7898	-0.0133239				43.8929	-0.00943919				43.966	-0.00555798				44.0091	-0.00169027				44.0222	0.002154				44.0056	0.00596494				43.9595	0.00973278
				20	0.05	85.85	20	43.5778	-0.0212258	43.6473	-0.0171987				43.7834	-0.0133225				43.8865	-0.00943994				43.9596	-0.00556085				44.0027	-0.00169526				44.0159	0.00214691				43.9993	0.00595577				43.9533	0.00972155
				20	0.05	85.9	20	43.5715	-0.02122	43.641	-0.0171952				43.777	-0.0133212				43.8801	-0.00944069				43.9533	-0.00556372				43.9964	-0.00170024				44.0096	0.00213982				43.9931	0.0059466				43.9471	0.00971033
				20	0.05	85.95	20	43.5651	-0.0212143	43.6346	-0.0171917				43.7706	-0.0133198				43.8737	-0.00944144				43.9469	-0.00556659				43.99	-0.00170523				44.0032	0.00213274				43.9868	0.00593744				43.9409	0.00969911
				20	0.05	86	20	43.5588	-0.0212086	43.6283	-0.0171882				43.7642	-0.0133184				43.8674	-0.00944218				43.9405	-0.00556946				43.9836	-0.00171021				43.9969	0.00212566				43.9805	0.00592828				43.9347	0.0096879
				20	0.05	86.05	20	43.5525	-0.0212029	43.6219	-0.0171847				43.7579	-0.013317				43.861	-0.00944293				43.9341	-0.00557233				43.9773	-0.00171518				43.9906	0.00211858				43.9742	0.00591913				43.9285	0.0096767
				20	0.05	86.1	20	43.5461	-0.0211972	43.6156	-0.0171812				43.7515	-0.0133157				43.8546	-0.00944367				43.9277	-0.00557519				43.9709	-0.00172016				43.9843	0.00211151				43.968	0.00590998				43.9223	0.0096655
				20	0.05	86.15	20	43.5398	-0.0211915	43.6092	-0.0171777				43.7451	-0.0133143				43.8482	-0.00944442				43.9214	-0.00557805				43.9646	-0.00172513				43.978	0.00210445				43.9617	0.00590084				43.9161	0.00965431
				20	0.05	86.2	20	43.5335	-0.0211858	43.6029	-0.0171742				43.7388	-0.0133129				43.8418	-0.00944516				43.915	-0.00558091				43.9582	-0.0017301				43.9717	0.00209739				43.9555	0.00589171				43.9099	0.00964313
				20	0.05	86.25	20	43.5272	-0.0211801	43.5966	-0.0171707				43.7324	-0.0133115				43.8355	-0.0094459				43.9086	-0.00558377				43.9519	-0.00173506				43.9654	0.00209033				43.9492	0.00588258				43.9037	0.00963195
				20	0.05	86.3	20	43.5209	-0.0211745	43.5902	-0.0171672				43.726	-0.0133101				43.8291	-0.00944665				43.9023	-0.00558663				43.9455	-0.00174003				43.9591	0.00208327				43.943	0.00587345				43.8976	0.00962078
				20	0.05	86.35	20	43.5146	-0.0211688	43.5839	-0.0171637				43.7197	-0.0133088				43.8227	-0.00944739				43.8959	-0.00558948				43.9392	-0.00174498				43.9528	0.00207623				43.9367	0.00586433				43.8914	0.00960962
				20	0.05	86.4	20	43.5082	-0.0211631	43.5776	-0.0171602				43.7133	-0.0133074				43.8164	-0.00944813				43.8895	-0.00559234				43.9329	-0.00174994				43.9465	0.00206918				43.9305	0.00585522				43.8852	0.00959846
				20	0.05	86.45	20	43.5019	-0.0211574	43.5713	-0.0171567				43.707	-0.013306				43.81	-0.00944887				43.8832	-0.00559519				43.9266	-0.00175489				43.9402	0.00206214				43.9243	0.00584611				43.8791	0.00958731
				20	0.05	86.5	20	43.4956	-0.0211517	43.5649	-0.0171533				43.7006	-0.0133047				43.8037	-0.00944961				43.8769	-0.00559804				43.9202	-0.00175984				43.9339	0.0020551				43.918	0.00583701				43.8729	0.00957617
				20	0.05	86.55	20	43.4893	-0.0211461	43.5586	-0.0171498				43.6943	-0.0133033				43.7973	-0.00945035				43.8705	-0.00560088				43.9139	-0.00176479				43.9276	0.00204807				43.9118	0.00582791				43.8667	0.00956503
				20	0.05	86.6	20	43.483	-0.0211404	43.5523	-0.0171463				43.688	-0.0133019				43.791	-0.00945109				43.8642	-0.00560373				43.9076	-0.00176973				43.9213	0.00204104				43.9056	0.00581882				43.8606	0.0095539
				20	0.05	86.65	20	43.4768	-0.0211347	43.546	-0.0171428				43.6816	-0.0133005				43.7846	-0.00945182				43.8578	-0.00560657				43.9013	-0.00177468				43.9151	0.00203402				43.8994	0.00580973				43.8544	0.00954277
				20	0.05	86.7	20	43.4705	-0.0211291	43.5397	-0.0171393				43.6753	-0.0132992				43.7783	-0.00945256				43.8515	-0.00560941				43.895	-0.00177961				43.9088	0.002027				43.8931	0.00580065				43.8483	0.00953166
				20	0.05	86.75	20	43.4642	-0.0211234	43.5334	-0.0171359				43.669	-0.0132978				43.772	-0.0094533				43.8452	-0.00561225				43.8886	-0.00178455				43.9025	0.00201999				43.8869	0.00579158				43.8421	0.00952055
				20	0.05	86.8	20	43.4579	-0.0211178	43.5271	-0.0171324				43.6627	-0.0132964				43.7656	-0.00945403				43.8388	-0.00561509				43.8823	-0.00178948				43.8962	0.00201298				43.8807	0.00578251				43.836	0.00950944
				20	0.05	86.85	20	43.4516	-0.0211121	43.5208	-0.0171289				43.6563	-0.0132951				43.7593	-0.00945477				43.8325	-0.00561793				43.876	-0.00179441				43.89	0.00200597				43.8745	0.00577344				43.8299	0.00949834
				20	0.05	86.9	20	43.4454	-0.0211065	43.5146	-0.0171255				43.65	-0.0132937				43.753	-0.0094555				43.8262	-0.00562076				43.8697	-0.00179933				43.8837	0.00199897				43.8683	0.00576438				43.8237	0.00948725
				20	0.05	86.95	20	43.4391	-0.0211008	43.5083	-0.017122				43.6437	-0.0132923				43.7466	-0.00945624				43.8199	-0.0056236				43.8634	-0.00180426				43.8775	0.00199197				43.8621	0.00575533				43.8176	0.00947617
				20	0.05	87	20	43.4328	-0.0210952	43.502	-0.0171185				43.6374	-0.013291				43.7403	-0.00945697				43.8136	-0.00562643				43.8572	-0.00180918				43.8712	0.00198497				43.8559	0.00574628				43.8115	0.00946509
				20	0.05	87.05	20	43.4266	-0.0210895	43.4957	-0.0171151				43.6311	-0.0132896				43.734	-0.0094577				43.8073	-0.00562926				43.8509	-0.00181409				43.865	0.00197798				43.8497	0.00573723				43.8053	0.00945402
				20	0.05	87.1	20	43.4203	-0.0210839	43.4894	-0.0171116				43.6248	-0.0132882				43.7277	-0.00945844				43.8009	-0.00563208				43.8446	-0.00181901				43.8587	0.001971				43.8435	0.0057282				43.7992	0.00944295
				20	0.05	87.15	20	43.414	-0.0210783	43.4832	-0.0171082				43.6185	-0.0132869				43.7214	-0.00945917				43.7946	-0.00563491				43.8383	-0.00182392				43.8525	0.00196402				43.8373	0.00571916				43.7931	0.00943189
				20	0.05	87.2	20	43.4078	-0.0210726	43.4769	-0.0171047				43.6122	-0.0132855				43.7151	-0.0094599				43.7883	-0.00563773				43.832	-0.00182882				43.8462	0.00195704				43.8311	0.00571014				43.787	0.00942084
				20	0.05	87.25	20	43.4015	-0.021067	43.4706	-0.0171012				43.6059	-0.0132841				43.7088	-0.00946063				43.7821	-0.00564055				43.8258	-0.00183373				43.84	0.00195007				43.8249	0.00570111				43.7809	0.00940979
				20	0.05	87.3	20	43.3953	-0.0210614	43.4644	-0.0170978				43.5996	-0.0132828				43.7025	-0.00946136				43.7758	-0.00564337				43.8195	-0.00183863				43.8338	0.0019431				43.8188	0.0056921				43.7748	0.00939875
				20	0.05	87.35	20	43.389	-0.0210558	43.4581	-0.0170943				43.5933	-0.0132814				43.6962	-0.00946209				43.7695	-0.00564619				43.8132	-0.00184353				43.8275	0.00193613				43.8126	0.00568309				43.7687	0.00938772
				20	0.05	87.4	20	43.3828	-0.0210501	43.4519	-0.0170909				43.5871	-0.01328				43.6899	-0.00946282				43.7632	-0.00564901				43.807	-0.00184842				43.8213	0.00192917				43.8064	0.00567408				43.7625	0.00937669
				20	0.05	87.45	20	43.3766	-0.0210445	43.4456	-0.0170874				43.5808	-0.0132787				43.6836	-0.00946355				43.7569	-0.00565182				43.8007	-0.00185332				43.8151	0.00192221				43.8003	0.00566508				43.7564	0.00936567
				20	0.05	87.5	20	43.3703	-0.0210389	43.4394	-0.017084				43.5745	-0.0132773				43.6773	-0.00946427				43.7506	-0.00565464				43.7944	-0.00185821				43.8089	0.00191526				43.7941	0.00565608				43.7504	0.00935466
				20	0.05	87.55	20	43.3641	-0.0210333	43.4331	-0.0170805				43.5682	-0.013276				43.671	-0.009465				43.7443	-0.00565745				43.7882	-0.00186309				43.8026	0.00190831				43.7879	0.00564709				43.7443	0.00934365
				20	0.05	87.6	20	43.3579	-0.0210277	43.4269	-0.0170771				43.562	-0.0132746				43.6648	-0.00946573				43.7381	-0.00566026				43.7819	-0.00186798				43.7964	0.00190137				43.7818	0.00563811				43.7382	0.00933265
				20	0.05	87.65	20	43.3517	-0.0210221	43.4206	-0.0170737				43.5557	-0.0132733				43.6585	-0.00946645				43.7318	-0.00566306				43.7757	-0.00187286				43.7902	0.00189443				43.7756	0.00562913				43.7321	0.00932165
				20	0.05	87.7	20	43.3454	-0.0210165	43.4144	-0.0170702				43.5495	-0.0132719				43.6522	-0.00946718				43.7255	-0.00566587				43.7694	-0.00187773				43.784	0.00188749				43.7695	0.00562015				43.726	0.00931067
				20	0.05	87.75	20	43.3392	-0.0210109	43.4082	-0.0170668				43.5432	-0.0132705				43.646	-0.0094679				43.7193	-0.00566867				43.7632	-0.00188261				43.7778	0.00188056				43.7633	0.00561118				43.7199	0.00929968
				20	0.05	87.8	20	43.333	-0.0210053	43.402	-0.0170634				43.5369	-0.0132692				43.6397	-0.00946863				43.713	-0.00567147				43.757	-0.00188748				43.7716	0.00187364				43.7572	0.00560222				43.7139	0.00928871
				20	0.05	87.85	20	43.3268	-0.0209997	43.3957	-0.0170599				43.5307	-0.0132678				43.6334	-0.00946935				43.7068	-0.00567428				43.7507	-0.00189235				43.7654	0.00186671				43.751	0.00559326				43.7078	0.00927774
				20	0.05	87.9	20	43.3206	-0.0209941	43.3895	-0.0170565				43.5245	-0.0132665				43.6272	-0.00947007				43.7005	-0.00567707				43.7445	-0.00189722				43.7592	0.00185979				43.7449	0.00558431				43.7017	0.00926678
				20	0.05	87.95	20	43.3144	-0.0209885	43.3833	-0.0170531				43.5182	-0.0132651				43.6209	-0.0094708				43.6943	-0.00567987				43.7383	-0.00190208				43.753	0.00185288				43.7388	0.00557536				43.6956	0.00925582
				20	0.05	88	20	43.3082	-0.020983	43.3771	-0.0170496				43.512	-0.0132638				43.6147	-0.00947152				43.688	-0.00568267				43.7321	-0.00190694				43.7469	0.00184597				43.7326	0.00556642				43.6896	0.00924487
				20	0.05	88.05	20	43.302	-0.0209774	43.3709	-0.0170462				43.5057	-0.0132624				43.6084	-0.00947224				43.6818	-0.00568546				43.7258	-0.00191179				43.7407	0.00183906				43.7265	0.00555748				43.6835	0.00923393
				20	0.05	88.1	20	43.2958	-0.0209718	43.3647	-0.0170428				43.4995	-0.0132611				43.6022	-0.00947296				43.6755	-0.00568825				43.7196	-0.00191665				43.7345	0.00183216				43.7204	0.00554855				43.6775	0.00922299
				20	0.05	88.15	20	43.2896	-0.0209662	43.3585	-0.0170394				43.4933	-0.0132597				43.5959	-0.00947368				43.6693	-0.00569104				43.7134	-0.0019215				43.7283	0.00182526				43.7142	0.00553962				43.6714	0.00921206
				20	0.05	88.2	20	43.2834	-0.0209607	43.3523	-0.0170359				43.487	-0.0132583				43.5897	-0.0094744				43.6631	-0.00569383				43.7072	-0.00192635				43.7222	0.00181836				43.7081	0.0055307				43.6654	0.00920114
				20	0.05	88.25	20	43.2773	-0.0209551	43.3461	-0.0170325				43.4808	-0.013257				43.5835	-0.00947512				43.6569	-0.00569661				43.701	-0.00193119				43.716	0.00181147				43.702	0.00552178				43.6593	0.00919022
				20	0.05	88.3	20	43.2711	-0.0209495	43.3399	-0.0170291				43.4746	-0.0132556				43.5772	-0.00947583				43.6506	-0.0056994				43.6948	-0.00193604				43.7098	0.00180459				43.6959	0.00551287				43.6533	0.00917931
				20	0.05	88.35	20	43.2649	-0.020944	43.3337	-0.0170257				43.4684	-0.0132543				43.571	-0.00947655				43.6444	-0.00570218				43.6886	-0.00194087				43.7037	0.0017977				43.6898	0.00550396				43.6472	0.0091684
				20	0.05	88.4	20	43.2587	-0.0209384	43.3275	-0.0170223				43.4622	-0.0132529				43.5648	-0.00947727				43.6382	-0.00570496				43.6824	-0.00194571				43.6975	0.00179083				43.6837	0.00549506				43.6412	0.0091575
				20	0.05	88.45	20	43.2526	-0.0209329	43.3213	-0.0170189				43.456	-0.0132516				43.5586	-0.00947799				43.632	-0.00570774				43.6762	-0.00195054				43.6913	0.00178395				43.6776	0.00548617				43.6352	0.00914661
				20	0.05	88.5	20	43.2464	-0.0209273	43.3152	-0.0170155				43.4498	-0.0132502				43.5524	-0.0094787				43.6258	-0.00571052				43.67	-0.00195538				43.6852	0.00177708				43.6715	0.00547728				43.6291	0.00913572
				20	0.05	88.55	20	43.2402	-0.0209218	43.309	-0.0170121				43.4436	-0.0132489				43.5461	-0.00947942				43.6196	-0.00571329				43.6638	-0.0019602				43.679	0.00177022				43.6654	0.00546839				43.6231	0.00912484
				20	0.05	88.6	20	43.2341	-0.0209162	43.3028	-0.0170086				43.4374	-0.0132476				43.5399	-0.00948013				43.6134	-0.00571607				43.6576	-0.00196503				43.6729	0.00176335				43.6593	0.00545951				43.6171	0.00911397
				20	0.05	88.65	20	43.2279	-0.0209107	43.2966	-0.0170052				43.4312	-0.0132462				43.5337	-0.00948085				43.6072	-0.00571884				43.6515	-0.00196985				43.6668	0.0017565				43.6532	0.00545064				43.6111	0.0091031
				20	0.05	88.7	20	43.2218	-0.0209051	43.2905	-0.0170018				43.425	-0.0132449				43.5275	-0.00948156				43.601	-0.00572161				43.6453	-0.00197467				43.6606	0.00174964				43.6471	0.00544177				43.6051	0.00909224
				20	0.05	88.75	20	43.2156	-0.0208996	43.2843	-0.0169984				43.4188	-0.0132435				43.5213	-0.00948227				43.5948	-0.00572438				43.6391	-0.00197948				43.6545	0.00174279				43.641	0.0054329				43.599	0.00908138
				20	0.05	88.8	20	43.2095	-0.0208941	43.2782	-0.016995				43.4126	-0.0132422				43.5151	-0.00948299				43.5886	-0.00572714				43.633	-0.0019843				43.6484	0.00173595				43.635	0.00542404				43.593	0.00907053
				20	0.05	88.85	20	43.2033	-0.0208885	43.272	-0.0169916				43.4064	-0.0132408				43.5089	-0.0094837				43.5824	-0.00572991				43.6268	-0.00198911				43.6422	0.00172911				43.6289	0.00541519				43.587	0.00905969
				20	0.05	88.9	20	43.1972	-0.020883	43.2658	-0.0169883				43.4002	-0.0132395				43.5028	-0.00948441				43.5762	-0.00573267				43.6206	-0.00199392				43.6361	0.00172227				43.6228	0.00540634				43.581	0.00904886
				20	0.05	88.95	20	43.1911	-0.0208775	43.2597	-0.0169849				43.3941	-0.0132381				43.4966	-0.00948512				43.57	-0.00573544				43.6145	-0.00199872				43.63	0.00171543				43.6168	0.0053975				43.575	0.00903803
				20	0.05	89	20	43.1849	-0.020872	43.2536	-0.0169815				43.3879	-0.0132368				43.4904	-0.00948583				43.5639	-0.0057382				43.6083	-0.00200352				43.6239	0.0017086				43.6107	0.00538866				43.569	0.0090272
				20	0.05	89.05	20	43.1788	-0.0208664	43.2474	-0.0169781				43.3817	-0.0132355				43.4842	-0.00948654				43.5577	-0.00574095				43.6022	-0.00200832				43.6178	0.00170178				43.6046	0.00537982				43.563	0.00901639
				20	0.05	89.1	20	43.1727	-0.0208609	43.2413	-0.0169747				43.3756	-0.0132341				43.478	-0.00948725				43.5515	-0.00574371				43.596	-0.00201312				43.6116	0.00169496				43.5986	0.005371				43.557	0.00900557
				20	0.05	89.15	20	43.1666	-0.0208554	43.2351	-0.0169713				43.3694	-0.0132328				43.4719	-0.00948796				43.5453	-0.00574646				43.5899	-0.00201791				43.6055	0.00168814				43.5925	0.00536217				43.5511	0.00899477
				20	0.05	89.2	20	43.1604	-0.0208499	43.229	-0.0169679				43.3632	-0.0132314				43.4657	-0.00948867				43.5392	-0.00574922				43.5837	-0.0020227				43.5994	0.00168133				43.5865	0.00535335				43.5451	0.00898397
				20	0.05	89.25	20	43.1543	-0.0208444	43.2229	-0.0169645				43.3571	-0.0132301				43.4595	-0.00948937				43.533	-0.00575197				43.5776	-0.00202749				43.5933	0.00167452				43.5804	0.00534454				43.5391	0.00897318
				20	0.05	89.3	20	43.1482	-0.0208389	43.2168	-0.0169612				43.3509	-0.0132288				43.4534	-0.00949008				43.5269	-0.00575472				43.5715	-0.00203227				43.5872	0.00166771				43.5744	0.00533573				43.5331	0.00896239
				20	0.05	89.35	20	43.1421	-0.0208334	43.2106	-0.0169578				43.3448	-0.0132274				43.4472	-0.00949079				43.5207	-0.00575747				43.5653	-0.00203705				43.5811	0.00166091				43.5683	0.00532693				43.5271	0.00895161
				20	0.05	89.4	20	43.136	-0.0208279	43.2045	-0.0169544				43.3386	-0.0132261				43.4411	-0.00949149				43.5146	-0.00576021				43.5592	-0.00204183				43.575	0.00165411				43.5623	0.00531813				43.5212	0.00894084
				20	0.05	89.45	20	43.1299	-0.0208224	43.1984	-0.016951				43.3325	-0.0132247				43.4349	-0.0094922				43.5084	-0.00576296				43.5531	-0.00204661				43.569	0.00164732				43.5563	0.00530934				43.5152	0.00893007
				20	0.05	89.5	20	43.1238	-0.0208169	43.1923	-0.0169477				43.3264	-0.0132234				43.4288	-0.0094929				43.5023	-0.0057657				43.5469	-0.00205138				43.5629	0.00164053				43.5502	0.00530055				43.5092	0.00891931
				20	0.05	89.55	20	43.1177	-0.0208114	43.1862	-0.0169443				43.3202	-0.0132221				43.4226	-0.00949361				43.4961	-0.00576844				43.5408	-0.00205615				43.5568	0.00163374				43.5442	0.00529177				43.5033	0.00890856
				20	0.05	89.6	20	43.1116	-0.0208059	43.1801	-0.0169409				43.3141	-0.0132207				43.4165	-0.00949431				43.49	-0.00577118				43.5347	-0.00206092				43.5507	0.00162696				43.5382	0.00528299				43.4973	0.00889781
				20	0.05	89.65	20	43.1055	-0.0208005	43.174	-0.0169375				43.308	-0.0132194				43.4103	-0.00949501				43.4839	-0.00577392				43.5286	-0.00206568				43.5446	0.00162019				43.5321	0.00527422				43.4914	0.00888706
				20	0.05	89.7	20	43.0995	-0.020795	43.1679	-0.0169342				43.3018	-0.0132181				43.4042	-0.00949572				43.4777	-0.00577665				43.5225	-0.00207044				43.5386	0.00161341				43.5261	0.00526546				43.4854	0.00887633
				20	0.05	89.75	20	43.0934	-0.0207895	43.1618	-0.0169308				43.2957	-0.0132167				43.3981	-0.00949642				43.4716	-0.00577939				43.5164	-0.0020752				43.5325	0.00160664				43.5201	0.00525669				43.4795	0.0088656
				20	0.05	89.8	20	43.0873	-0.020784	43.1557	-0.0169274				43.2896	-0.0132154				43.3919	-0.00949712				43.4655	-0.00578212				43.5103	-0.00207996				43.5264	0.00159988				43.5141	0.00524794				43.4735	0.00885487
				20	0.05	89.85	20	43.0812	-0.0207786	43.1496	-0.0169241				43.2835	-0.0132141				43.3858	-0.00949782				43.4594	-0.00578485				43.5042	-0.00208471				43.5204	0.00159311				43.5081	0.00523918				43.4676	0.00884416
				20	0.05	89.9	20	43.0752	-0.0207731	43.1435	-0.0169207				43.2774	-0.0132127				43.3797	-0.00949852				43.4533	-0.00578758				43.4981	-0.00208946				43.5143	0.00158636				43.5021	0.00523044				43.4616	0.00883344
				20	0.05	89.95	20	43.0691	-0.0207676	43.1374	-0.0169174				43.2713	-0.0132114				43.3736	-0.00949922				43.4471	-0.00579031				43.492	-0.00209421				43.5083	0.0015796				43.4961	0.0052217				43.4557	0.00882274
				20	0.05	90	20	43.063	-0.0207622	43.1314	-0.016914				43.2652	-0.0132101				43.3675	-0.00949992				43.441	-0.00579304				43.4859	-0.00209895				43.5022	0.00157285				43.4901	0.00521296				43.4498	0.00881204
				20	0.05	90.05	20	43.057	-0.0207567	43.1253	-0.0169107				43.2591	-0.0132088				43.3613	-0.00950062				43.4349	-0.00579576				43.4798	-0.00210369				43.4962	0.00156611				43.4841	0.00520423				43.4439	0.00880135
				20	0.05	90.1	20	43.0509	-0.0207513	43.1192	-0.0169073				43.253	-0.0132074				43.3552	-0.00950132				43.4288	-0.00579848				43.4738	-0.00210843				43.4901	0.00155937				43.4781	0.0051955				43.4379	0.00879066
				20	0.05	90.15	20	43.0448	-0.0207458	43.1132	-0.016904				43.2469	-0.0132061				43.3491	-0.00950202				43.4227	-0.0058012				43.4677	-0.00211317				43.4841	0.00155263				43.4721	0.00518678				43.432	0.00877998
				20	0.05	90.2	20	43.0388	-0.0207404	43.1071	-0.0169006				43.2408	-0.0132048				43.343	-0.00950271				43.4166	-0.00580392				43.4616	-0.0021179				43.478	0.00154589				43.4661	0.00517806				43.4261	0.0087693
				20	0.05	90.25	20	43.0328	-0.0207349	43.101	-0.0168973				43.2347	-0.0132035				43.3369	-0.00950341				43.4105	-0.00580664				43.4555	-0.00212263				43.472	0.00153916				43.4601	0.00516935				43.4202	0.00875863
				20	0.05	90.3	20	43.0267	-0.0207295	43.095	-0.0168939				43.2286	-0.0132021				43.3308	-0.00950411				43.4044	-0.00580936				43.4495	-0.00212736				43.466	0.00153244				43.4542	0.00516065				43.4143	0.00874797
				20	0.05	90.35	20	43.0207	-0.020724	43.0889	-0.0168906				43.2225	-0.0132008				43.3248	-0.0095048				43.3984	-0.00581207				43.4434	-0.00213208				43.4599	0.00152572				43.4482	0.00515195				43.4083	0.00873731
				20	0.05	90.4	20	43.0146	-0.0207186	43.0829	-0.0168872				43.2165	-0.0131995				43.3187	-0.0095055				43.3923	-0.00581478				43.4373	-0.0021368				43.4539	0.001519				43.4422	0.00514325				43.4024	0.00872666
				20	0.05	90.45	20	43.0086	-0.0207132	43.0768	-0.0168839				43.2104	-0.0131982				43.3126	-0.00950619				43.3862	-0.00581749				43.4313	-0.00214152				43.4479	0.00151228				43.4362	0.00513456				43.3965	0.00871602
				20	0.05	90.5	20	43.0026	-0.0207077	43.0708	-0.0168806				43.2043	-0.0131968				43.3065	-0.00950689				43.3801	-0.0058202				43.4252	-0.00214624				43.4419	0.00150557				43.4303	0.00512587				43.3906	0.00870538
				20	0.05	90.55	20	42.9965	-0.0207023	43.0647	-0.0168772				43.1982	-0.0131955				43.3004	-0.00950758				43.3741	-0.00582291				43.4192	-0.00215095				43.4359	0.00149887				43.4243	0.00511719				43.3847	0.00869475
				20	0.05	90.6	20	42.9905	-0.0206969	43.0587	-0.0168739				43.1922	-0.0131942				43.2943	-0.00950827				43.368	-0.00582562				43.4131	-0.00215566				43.4298	0.00149216				43.4183	0.00510852				43.3789	0.00868412
				20	0.05	90.65	20	42.9845	-0.0206915	43.0527	-0.0168706				43.1861	-0.0131929				43.2883	-0.00950896				43.3619	-0.00582832				43.4071	-0.00216037				43.4238	0.00148547				43.4124	0.00509984				43.373	0.0086735
				20	0.05	90.7	20	42.9785	-0.020686	43.0466	-0.0168672				43.1801	-0.0131915				43.2822	-0.00950966				43.3559	-0.00583102				43.401	-0.00216508				43.4178	0.00147877				43.4064	0.00509118				43.3671	0.00866289
				20	0.05	90.75	20	42.9725	-0.0206806	43.0406	-0.0168639				43.174	-0.0131902				43.2761	-0.00951035				43.3498	-0.00583372				43.395	-0.00216978				43.4118	0.00147208				43.4005	0.00508252				43.3612	0.00865228
				20	0.05	90.8	20	42.9664	-0.0206752	43.0346	-0.0168606				43.168	-0.0131889				43.2701	-0.00951104				43.3437	-0.00583642				43.389	-0.00217448				43.4058	0.00146539				43.3945	0.00507386				43.3553	0.00864168
				20	0.05	90.85	20	42.9604	-0.0206698	43.0285	-0.0168572				43.1619	-0.0131876				43.264	-0.00951173				43.3377	-0.00583912				43.3829	-0.00217918				43.3998	0.00145871				43.3886	0.00506521				43.3494	0.00863109
				20	0.05	90.9	20	42.9544	-0.0206644	43.0225	-0.0168539				43.1559	-0.0131863				43.258	-0.00951242				43.3316	-0.00584182				43.3769	-0.00218387				43.3938	0.00145203				43.3827	0.00505656				43.3436	0.0086205
				20	0.05	90.95	20	42.9484	-0.020659	43.0165	-0.0168506				43.1498	-0.0131849				43.2519	-0.00951311				43.3256	-0.00584451				43.3709	-0.00218856				43.3879	0.00144535				43.3767	0.00504792				43.3377	0.00860991
				20	0.05	91	20	42.9424	-0.0206536	43.0105	-0.0168473				43.1438	-0.0131836				43.2459	-0.0095138				43.3195	-0.0058472				43.3649	-0.00219325				43.3819	0.00143868				43.3708	0.00503929				43.3318	0.00859934
				20	0.05	91.05	20	42.9364	-0.0206482	43.0045	-0.016844				43.1377	-0.0131823				43.2398	-0.00951449				43.3135	-0.00584989				43.3588	-0.00219794				43.3759	0.00143202				43.3649	0.00503066				43.326	0.00858876
				20	0.05	91.1	20	42.9304	-0.0206428	42.9985	-0.0168406				43.1317	-0.013181				43.2338	-0.00951517				43.3075	-0.00585258				43.3528	-0.00220262				43.3699	0.00142535				43.3589	0.00502203				43.3201	0.0085782
				20	0.05	91.15	20	42.9245	-0.0206374	42.9925	-0.0168373				43.1257	-0.0131797				43.2277	-0.00951586				43.3014	-0.00585527				43.3468	-0.0022073				43.3639	0.00141869				43.353	0.00501341				43.3142	0.00856764
				20	0.05	91.2	20	42.9185	-0.020632	42.9865	-0.016834				43.1197	-0.0131784				43.2217	-0.00951655				43.2954	-0.00585796				43.3408	-0.00221198				43.358	0.00141204				43.3471	0.00500479				43.3084	0.00855709
				20	0.05	91.25	20	42.9125	-0.0206266	42.9805	-0.0168307				43.1136	-0.0131771				43.2157	-0.00951724				43.2894	-0.00586064				43.3348	-0.00221665				43.352	0.00140538				43.3412	0.00499618				43.3025	0.00854654
				20	0.05	91.3	20	42.9065	-0.0206212	42.9745	-0.0168274				43.1076	-0.0131757				43.2096	-0.00951792				43.2834	-0.00586332				43.3288	-0.00222132				43.346	0.00139874				43.3352	0.00498758				43.2967	0.008536
				20	0.05	91.35	20	42.9005	-0.0206159	42.9685	-0.0168241				43.1016	-0.0131744				43.2036	-0.00951861				43.2773	-0.005866				43.3228	-0.00222599				43.3401	0.00139209				43.3293	0.00497897				43.2908	0.00852546
				20	0.05	91.4	20	42.8946	-0.0206105	42.9625	-0.0168208				43.0956	-0.0131731				43.1976	-0.00951929				43.2713	-0.00586868				43.3168	-0.00223066				43.3341	0.00138545				43.3234	0.00497038				43.285	0.00851493
				20	0.05	91.45	20	42.8886	-0.0206051	42.9565	-0.0168175				43.0896	-0.0131718				43.1916	-0.00951998				43.2653	-0.00587136				43.3108	-0.00223532				43.3281	0.00137882				43.3175	0.00496179				43.2792	0.00850441
				20	0.05	91.5	20	42.8826	-0.0205997	42.9506	-0.0168142				43.0836	-0.0131705				43.1856	-0.00952066				43.2593	-0.00587404				43.3048	-0.00223998				43.3222	0.00137218				43.3116	0.0049532				43.2733	0.00849389
				20	0.05	91.55	20	42.8767	-0.0205944	42.9446	-0.0168109				43.0776	-0.0131692				43.1796	-0.00952134				43.2533	-0.00587671				43.2988	-0.00224464				43.3162	0.00136555				43.3057	0.00494462				43.2675	0.00848338
				20	0.05	91.6	20	42.8707	-0.020589	42.9386	-0.0168076				43.0716	-0.0131679				43.1735	-0.00952203				43.2473	-0.00587939				43.2928	-0.0022493				43.3103	0.00135893				43.2998	0.00493604				43.2617	0.00847288
				20	0.05	91.65	20	42.8648	-0.0205836	42.9327	-0.0168043				43.0656	-0.0131666				43.1675	-0.00952271				43.2413	-0.00588206				43.2869	-0.00225395				43.3044	0.00135231				43.2939	0.00492747				43.2558	0.00846238
				20	0.05	91.7	20	42.8588	-0.0205783	42.9267	-0.016801				43.0596	-0.0131653				43.1615	-0.00952339				43.2353	-0.00588473				43.2809	-0.0022586				43.2984	0.00134569				43.288	0.0049189				43.25	0.00845189
				20	0.05	91.75	20	42.8528	-0.0205729	42.9207	-0.0167977				43.0536	-0.0131639				43.1555	-0.00952407				43.2293	-0.0058874				43.2749	-0.00226325				43.2925	0.00133908				43.2822	0.00491034				43.2442	0.0084414
				20	0.05	91.8	20	42.8469	-0.0205676	42.9148	-0.0167944				43.0476	-0.0131626				43.1495	-0.00952475				43.2233	-0.00589006				43.2689	-0.00226789				43.2865	0.00133247				43.2763	0.00490178				43.2384	0.00843092
				20	0.05	91.85	20	42.841	-0.0205622	42.9088	-0.0167911				43.0416	-0.0131613				43.1436	-0.00952543				43.2173	-0.00589273				43.263	-0.00227253				43.2806	0.00132586				43.2704	0.00489323				43.2326	0.00842044
				20	0.05	91.9	20	42.835	-0.0205569	42.9029	-0.0167878				43.0357	-0.01316				43.1376	-0.00952611				43.2113	-0.00589539				43.257	-0.00227717				43.2747	0.00131926				43.2645	0.00488468				43.2268	0.00840997
				20	0.05	91.95	20	42.8291	-0.0205515	42.8969	-0.0167845				43.0297	-0.0131587				43.1316	-0.00952679				43.2054	-0.00589805				43.2511	-0.00228181				43.2688	0.00131266				43.2586	0.00487614				43.221	0.00839951
				20	0.05	92	20	42.8232	-0.0205462	42.891	-0.0167812				43.0237	-0.0131574				43.1256	-0.00952747				43.1994	-0.00590071				43.2451	-0.00228644				43.2628	0.00130607				43.2528	0.00486761				43.2151	0.00838905
				20	0.05	92.05	20	42.8172	-0.0205408	42.885	-0.016778				43.0177	-0.0131561				43.1196	-0.00952815				43.1934	-0.00590337				43.2391	-0.00229107				43.2569	0.00129947				43.2469	0.00485907				43.2093	0.0083786
				20	0.05	92.1	20	42.8113	-0.0205355	42.8791	-0.0167747				43.0118	-0.0131548				43.1136	-0.00952883				43.1874	-0.00590603				43.2332	-0.0022957				43.251	0.00129289				43.241	0.00485055				43.2036	0.00836816
				20	0.05	92.15	20	42.8054	-0.0205302	42.8731	-0.0167714				43.0058	-0.0131535				43.1077	-0.00952951				43.1815	-0.00590868				43.2272	-0.00230033				43.2451	0.00128631				43.2352	0.00484202				43.1978	0.00835772
				20	0.05	92.2	20	42.7995	-0.0205248	42.8672	-0.0167681				42.9999	-0.0131522				43.1017	-0.00953018				43.1755	-0.00591134				43.2213	-0.00230495				43.2392	0.00127973				43.2293	0.0048335				43.192	0.00834728
				20	0.05	92.25	20	42.7935	-0.0205195	42.8613	-0.0167648				42.9939	-0.0131509				43.0957	-0.00953086				43.1695	-0.00591399				43.2154	-0.00230957				43.2333	0.00127315				43.2235	0.00482499				43.1862	0.00833685
				20	0.05	92.3	20	42.7876	-0.0205142	42.8553	-0.0167616				42.9879	-0.0131496				43.0898	-0.00953154				43.1636	-0.00591664				43.2094	-0.00231419				43.2274	0.00126658				43.2176	0.00481648				43.1804	0.00832643
				20	0.05	92.35	20	42.7817	-0.0205089	42.8494	-0.0167583				42.982	-0.0131483				43.0838	-0.00953221				43.1576	-0.00591929				43.2035	-0.0023188				43.2215	0.00126001				43.2118	0.00480798				43.1746	0.00831602
				20	0.05	92.4	20	42.7758	-0.0205035	42.8435	-0.016755				42.9761	-0.013147				43.0779	-0.00953289				43.1517	-0.00592193				43.1976	-0.00232341				43.2156	0.00125345				43.2059	0.00479948				43.1688	0.00830561
				20	0.05	92.45	20	42.7699	-0.0204982	42.8376	-0.0167518				42.9701	-0.0131457				43.0719	-0.00953356				43.1457	-0.00592458				43.1916	-0.00232802				43.2097	0.00124689				43.2001	0.00479099				43.1631	0.0082952
				20	0.05	92.5	20	42.764	-0.0204929	42.8317	-0.0167485				42.9642	-0.0131444				43.066	-0.00953424				43.1398	-0.00592722				43.1857	-0.00233263				43.2038	0.00124033				43.1943	0.0047825				43.1573	0.00828481
				20	0.05	92.55	20	42.7581	-0.0204876	42.8258	-0.0167452				42.9582	-0.0131431				43.06	-0.00953491				43.1338	-0.00592987				43.1798	-0.00233723				43.1979	0.00123378				43.1884	0.00477402				43.1515	0.00827441
				20	0.05	92.6	20	42.7522	-0.0204823	42.8199	-0.016742				42.9523	-0.0131418				43.0541	-0.00953558				43.1279	-0.00593251				43.1739	-0.00234184				43.192	0.00122723				43.1826	0.00476554				43.1458	0.00826403
				20	0.05	92.65	20	42.7463	-0.020477	42.814	-0.0167387				42.9464	-0.0131405				43.0481	-0.00953625				43.122	-0.00593515				43.168	-0.00234643				43.1862	0.00122068				43.1768	0.00475706				43.14	0.00825365
				20	0.05	92.7	20	42.7404	-0.0204717	42.808	-0.0167354				42.9404	-0.0131392				43.0422	-0.00953693				43.116	-0.00593779				43.162	-0.00235103				43.1803	0.00121414				43.1709	0.00474859				43.1342	0.00824327
				20	0.05	92.75	20	42.7345	-0.0204664	42.8022	-0.0167322				42.9345	-0.0131379				43.0363	-0.0095376				43.1101	-0.00594042				43.1561	-0.00235562				43.1744	0.0012076				43.1651	0.00474013				43.1285	0.0082329
				20	0.05	92.8	20	42.7287	-0.0204611	42.7963	-0.0167289				42.9286	-0.0131366				43.0303	-0.00953827				43.1042	-0.00594306				43.1502	-0.00236021				43.1685	0.00120107				43.1593	0.00473167				43.1227	0.00822254
				20	0.05	92.85	20	42.7228	-0.0204558	42.7904	-0.0167257				42.9227	-0.0131353				43.0244	-0.00953894				43.0983	-0.00594569				43.1443	-0.0023648				43.1627	0.00119454				43.1535	0.00472322				43.117	0.00821219
				20	0.05	92.9	20	42.7169	-0.0204505	42.7845	-0.0167224				42.9168	-0.013134				43.0185	-0.00953961				43.0923	-0.00594832				43.1384	-0.00236939				43.1568	0.00118801				43.1477	0.00471477				43.1112	0.00820183
				20	0.05	92.95	20	42.711	-0.0204452	42.7786	-0.0167192				42.9109	-0.0131328				43.0125	-0.00954028				43.0864	-0.00595095				43.1325	-0.00237397				43.151	0.00118149				43.1419	0.00470632				43.1055	0.00819149
				20	0.05	93	20	42.7052	-0.0204399	42.7727	-0.0167159				42.9049	-0.0131315				43.0066	-0.00954095				43.0805	-0.00595358				43.1266	-0.00237855				43.1451	0.00117497				43.1361	0.00469788				43.0997	0.00818115
				20	0.05	93.05	20	42.6993	-0.0204347	42.7668	-0.0167127				42.899	-0.0131302				43.0007	-0.00954162				43.0746	-0.00595621				43.1208	-0.00238313				43.1392	0.00116846				43.1303	0.00468944				43.094	0.00817082
				20	0.05	93.1	20	42.6934	-0.0204294	42.761	-0.0167094				42.8931	-0.0131289				42.9948	-0.00954229				43.0687	-0.00595883				43.1149	-0.0023877				43.1334	0.00116195				43.1245	0.00468101				43.0883	0.00816049
				20	0.05	93.15	20	42.6876	-0.0204241	42.7551	-0.0167062				42.8872	-0.0131276				42.9889	-0.00954296				43.0628	-0.00596145				43.109	-0.00239227				43.1276	0.00115544				43.1187	0.00467259				43.0825	0.00815017
				20	0.05	93.2	20	42.6817	-0.0204188	42.7492	-0.0167029				42.8814	-0.0131263				42.983	-0.00954362				43.0569	-0.00596408				43.1031	-0.00239684				43.1217	0.00114893				43.1129	0.00466417				43.0768	0.00813985
				20	0.05	93.25	20	42.6759	-0.0204136	42.7434	-0.0166997				42.8755	-0.013125				42.9771	-0.00954429				43.051	-0.0059667				43.0972	-0.00240141				43.1159	0.00114243				43.1071	0.00465575				43.0711	0.00812954
				20	0.05	93.3	20	42.67	-0.0204083	42.7375	-0.0166964				42.8696	-0.0131237				42.9712	-0.00954496				43.0451	-0.00596932				43.0914	-0.00240597				43.11	0.00113594				43.1013	0.00464734				43.0654	0.00811924
				20	0.05	93.35	20	42.6642	-0.020403	42.7316	-0.0166932				42.8637	-0.0131224				42.9653	-0.00954562				43.0392	-0.00597193				43.0855	-0.00241053				43.1042	0.00112944				43.0955	0.00463893				43.0596	0.00810894
				20	0.05	93.4	20	42.6583	-0.0203978	42.7258	-0.01669				42.8578	-0.0131212				42.9594	-0.00954629				43.0333	-0.00597455				43.0796	-0.00241509				43.0984	0.00112296				43.0897	0.00463053				43.0539	0.00809865
				20	0.05	93.45	20	42.6525	-0.0203925	42.7199	-0.0166867				42.8519	-0.0131199				42.9535	-0.00954695				43.0275	-0.00597716				43.0738	-0.00241965				43.0925	0.00111647				43.0839	0.00462213				43.0482	0.00808836
				20	0.05	93.5	20	42.6467	-0.0203872	42.7141	-0.0166835				42.8461	-0.0131186				42.9476	-0.00954762				43.0216	-0.00597978				43.0679	-0.0024242				43.0867	0.00110999				43.0782	0.00461374				43.0425	0.00807808
				20	0.05	93.55	20	42.6408	-0.020382	42.7082	-0.0166803				42.8402	-0.0131173				42.9418	-0.00954828				43.0157	-0.00598239				43.062	-0.00242875				43.0809	0.00110351				43.0724	0.00460535				43.0368	0.00806781
				20	0.05	93.6	20	42.635	-0.0203767	42.7024	-0.016677				42.8343	-0.013116				42.9359	-0.00954895				43.0098	-0.005985				43.0562	-0.0024333				43.0751	0.00109704				43.0666	0.00459697				43.0311	0.00805754
				20	0.05	93.65	20	42.6292	-0.0203715	42.6965	-0.0166738				42.8284	-0.0131147				42.93	-0.00954961				43.004	-0.0059876				43.0503	-0.00243785				43.0693	0.00109057				43.0609	0.00458859				43.0254	0.00804727
[truncated: 140 more rows]
[truncated: 117 more columns]

## Sheet: Daten
		Berechnung der Kontakttemperatur bei kurzzeitiger Berührung
[truncated: 48 more rows]

[truncated: 3 more sheets: Tabelle4, Volumenelemente, Schwelle]
